# Supplementary material for: Visible light-driven α-sulfonylation of ketone-derived silyl enol ethers via an electron donor–acceptor complex
Source: Royal Society of Chemistry journal article supplement (doi:10.1039/d4gc04554h), 2024-01-01
Supplement: d4gc04554h1.pdf [file d4gc04554h1.pdf]

## **SUPPORTING INFORMATION**

### **Visible light driven $\alpha$ -sulfonylation of ketone-derived silyl enol ethers via electron donor-acceptor complex**

Barakha Saxena,<sup>a</sup> Roshan I. Patel,<sup>a</sup> and Anuj Sharma<sup>\*a</sup>

<sup>a</sup>Green Organic Synthesis Laboratory, Department of Chemistry, Indian Institute of Technology, Roorkee  
Roorkee, 247667, Uttarakhand (India)

Tel: +91-1331-284751

E-mail: anujsharma.mcl@gmail.com, anuj.sharma@cy.iitr.ac.in

## Table of Contents

|                                                                                                                     |             |
|---------------------------------------------------------------------------------------------------------------------|-------------|
| <b>1. General information.....</b>                                                                                  | <b>S3</b>   |
| <b>2. Detailed Optimization of Reaction Conditions.....</b>                                                         | <b>S4</b>   |
| 2.1 Screening of base.....                                                                                          | S4          |
| 2.2 Screening of solvent.....                                                                                       | S4          |
| 2.3 Optimization of different equivalents of DABCO.....                                                             | S4          |
| 2.4 Screening of light irradiation .....                                                                            | S5          |
| 2.5 Sensitivity assessment of reaction .....                                                                        | S5          |
| <b>3. General Procedure for Synthesis of Products.....</b>                                                          | <b>S6</b>   |
| 3.1 General procedure for the synthesis of silyl enol ethers .....                                                  | S6          |
| 3.2 General procedure for the synthesis of natural products.....                                                    | S8          |
| 3.3 General procedure for the synthesis of unsymmetrical thiosulfonates .....                                       | S9          |
| 3.4 General procedure for the synthesis of symmetrical thiosulfonates.....                                          | S9          |
| 3.5 General procedure <b>A</b> for the synthesis of $\beta$ -keto sulfones .....                                    | S10         |
| 3.6 General procedure <b>B</b> for the synthesis of $\beta$ -keto sulfones .....                                    | S11         |
| 3.7 Unsuitable substrates.....                                                                                      | S11         |
| <b>4. Procedure for the Gram Scale Synthesis of <math>\beta</math>-keto sulfones and recyclability of PhSSPh...</b> | <b>S12</b>  |
| <b>5. Mechanistic Studies.....</b>                                                                                  | <b>S12</b>  |
| 5.1 UV-visible absorption spectra .....                                                                             | S13         |
| 5.2. <sup>1</sup> H-NMR titration experiment .....                                                                  | S13         |
| 5.3 Job's plot .....                                                                                                | S15         |
| 5.4 Determination of association constant ( $k_{\text{EDA}}$ ) .....                                                | S16         |
| 5.5 Light-on/off experiment.....                                                                                    | S18         |
| 5.6 Radical Trapping Experiments .....                                                                              | S19         |
| 5.7 Irradiation of natural sunlight .....                                                                           | S22         |
| 5.8 Quantum Yield ( $\Phi$ ) .....                                                                                  | S23         |
| <b>6. Calculations of Green Chemistry Metrics.....</b>                                                              | <b>S26</b>  |
| <b>7. Calculations of EcoScale.....</b>                                                                             | <b>S34</b>  |
| <b>8. NMR data.....</b>                                                                                             | <b>S38</b>  |
| 8.1 Characterization data for products.....                                                                         | S39         |
| 8.2 NMR copies of products.....                                                                                     | S71         |
| <b>9. References.....</b>                                                                                           | <b>S136</b> |



## 1. General Information

**Reagents information:** Commercially available reagents and analytical grade solvents were purchased from Sigma-Aldrich, Toyko Chemical Company (TCI), Alfa-Aesar, MolyChem, SRL chemicals, AVRA, BLD pharm, GLR innovations, LOBA Chemie and AVARICE and were used as received without further purification. 1,4-DIAZABICYCLO (2,2,2) OCTANE (DABCO) was purchased from Alfa Aesar (Assay 98%, Cas No. 280-57-9).

**NMR Spectra:** Nuclear magnetic resonance (NMR) spectra for  $^1\text{H}$ ,  $^{13}\text{C}$ , and  $^{19}\text{F}$  NMR were recorded on a JEOL (500 MHz  $^1\text{H}$ , 126 MHz  $^{13}\text{C}$ ) spectrometer using  $\text{CDCl}_3$  as a solvent with tetramethylsilane (TMS) as internal standard. In the evaluation of  $^1\text{H}$  NMR spectra, chemical shift has been assigned in units of parts per million (ppm), wherein, “s” stands for singlet, “br.s” for broad singlet “d” for doublet, “t” for triplet, “q” for quartet, “dd” for doublet of doublets, “tt” for triplet of triplets, “dt” for doublet of triplets, “td” for triplet of doublets and “m” for multiplet. The units of coupling constant (J) has been assigned in Hz.

**High Resolution Mass Spectrometry (HRMS):** High resolution mass spectra (HRMS) were recorded with an Agilent LCQTOF spectrometer using ESI ionization.

**Melting points (mp):** Measurements were recorded on a OptiMelt, automated melting point apparatus (Stanford Research Systems, Inc.).

**Chromatography:** Reactions were monitored on Merck TLC silica gel 60 F254 plates and visualized using ultraviolet light of wavelength 254 nm. Column chromatography was performed on silica gel (100-200 mesh), eluted with hexane/ethyl acetate as a mobile phase.

**Photoreactor:** Visible light reaction was performed using a 40W Kessil PR160L lamp (456 nm), placed 3 cm away from reaction vials. The reaction setup was placed within a ventilated fume hood and using a fan to avoid overheating.

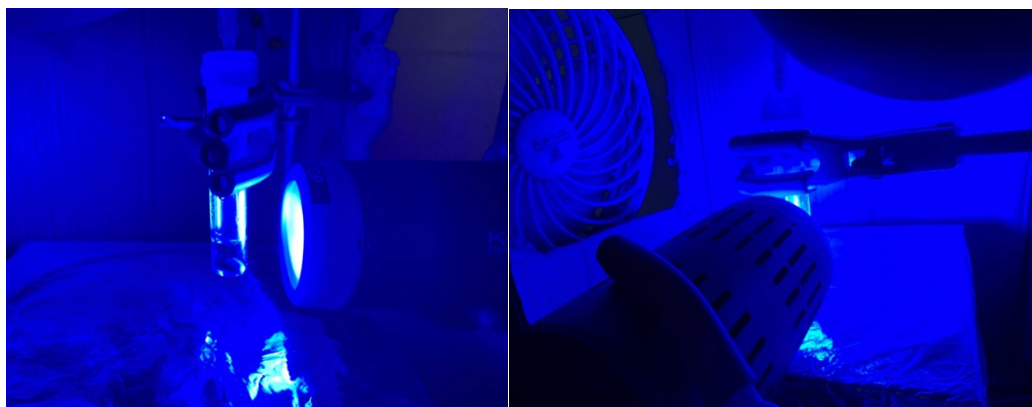



## 2. Detailed Optimization of Reaction Conditions

### 2.1 Screening of base

| Entry    | Base (2.0 equiv.) | Isolated Yield% |
|----------|-------------------|-----------------|
| 1        | TMEDA             | 48              |
| 2        | DBU               | 52              |
| 3        | DMAP              | 30              |
| 4        | Et <sub>3</sub> N | trace           |
| 5        | triphenylamine    | trace           |
| <b>6</b> | <b>DABCO</b>      | <b>67</b>       |

Reaction conditions: 1a (0.2 mmol), 2a (0.24 mmol, 2.0 equiv.) and base (0.4 mmol, 2.0 equiv.) in MeCN (0.5 mL) under blue Kessil ( $\lambda = 456$  nm) irradiation for 14 h at rt under argon atmosphere.

### 2.2 Screening of solvent

| Entry    | Base (2.0 equiv.) | Solvent    | Isolated Yield% |
|----------|-------------------|------------|-----------------|
| 1        | DABCO             | MeCN       | 67              |
| 2        | DABCO             | DMSO       | 72              |
| 3        | DABCO             | Acetone    | 38              |
| 4        | DABCO             | DCM        | 52              |
|          | DABCO             | DMF        | 70              |
| <b>5</b> | <b>DABCO</b>      | <b>DMA</b> | <b>81</b>       |
| 6        | DABCO             | EtOH       | nr              |
| 7        | DABCO             | DCE        | 55              |
| 8        | DABCO             | THF        | 42              |
| 9        | DABCO             | MeOH       | nr              |

Reaction conditions: 1a (0.2 mmol), 2a (0.24 mmol, 2.0 equiv.), and DABCO (0.4 mmol, 2.0 equiv.) in solvent (0.5 mL) under blue Kessil ( $\lambda = 456$  nm) irradiation for 14 h at rt under argon atmosphere; nr = no reaction

### 2.3 Optimization of different equivalents of DABCO

| Entry    | base         | Equiv.          | Isolated Yield% |
|----------|--------------|-----------------|-----------------|
| 1        | DABCO        | 1 equiv.        | 55              |
| 2        | DABCO        | 2 equiv.        | 81              |
| 3        | DABCO        | 2.5 equiv.      | 81              |
| <b>4</b> | <b>DABCO</b> | <b>3 equiv.</b> | <b>89</b>       |

Reaction conditions: 1a (0.2 mmol), 2a (0.24 mmol, 2.0 equiv.), and DABCO (x-equivalent) in DMA (0.5 mL) under blue Kessil ( $\lambda = 456$  nm) irradiation for 14 h at rt under argon atmosphere.

### 2.4 Screening of light Irradiation

| Entry | light                | Isolated Yield% |
|-------|----------------------|-----------------|
| 1     | White led            | 40              |
| 2     | Blue LEDS (427 nm)   | 65              |
| 3     | Blue LEDS (456 nm)   | 89              |
| 4     | Blue LEDS (440 nm)   | 77              |
| 5     | Purple LEDs (390 nm) | 55              |
| 6     | 3 W Green LED Strips | 72              |
| 7     | Dark (no light)      | nr              |
| 8     | Blue LEDS (456 nm)   | 62 <sup>b</sup> |

Reaction conditions: 1a (0.2 mmol), 2a (0.24 mmol, 2.0 equiv.), and DABCO (0.4 mmol, 3.0 equiv.) in DMA (0.5 mL) under various light irradiation for 14 h at rt under argon atmosphere; <sup>b</sup>open-to-air 1a (0.2 mmol), 2a (0.24 mmol, 2.0 equiv.) and DABCO (0.4 mmol, 3.0 equiv.) in DMA (0.5 mL) under blue LED (456 nm) irradiation for 14 h at rt; nr = no reaction

## 2.5. Sensitivity assessment of reaction

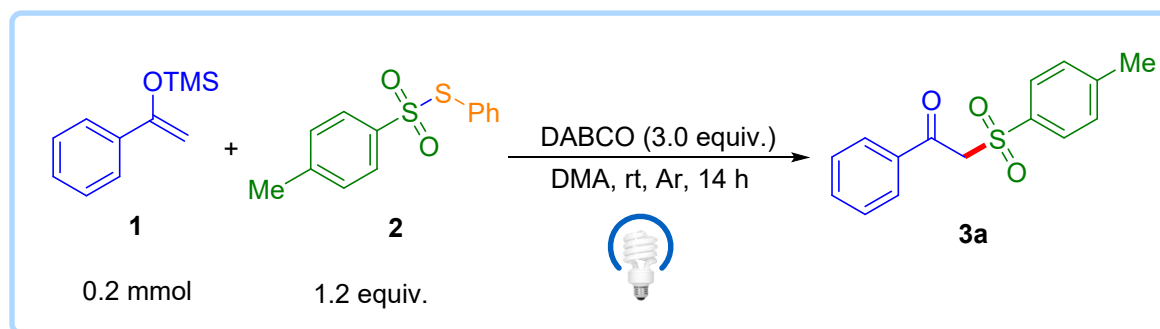

Table 1. Preparation of sensitivity assessment of reaction

| Entry | Parameter                     | Variation                                      | Description                              | Yield <sup>a</sup> |
|-------|-------------------------------|------------------------------------------------|------------------------------------------|--------------------|
| 1     | High concentration (+10%)     | $c + 10\% c$                                   | 0.45 mL DMA                              | 89%                |
| 2     | Low concentration (-10%)      | $c - 10\% c$                                   | 0.55 mL DMA                              | 82%                |
| 3     | High H <sub>2</sub> O         | +H <sub>2</sub> O;<br>$V_{H_2O} = 1\% V_{rxn}$ | 5 $\mu$ L H <sub>2</sub> O in 0.5 mL DMA | 85%                |
| 4     | O <sub>2</sub> level          | O <sub>2</sub> ballon                          | O <sub>2</sub> ballon instead of Ar      | 62%                |
| 5     | Low temperature ( <i>T</i> )  | $T - 10\text{ }^{\circ}\text{C}$               | 15 $^{\circ}\text{C}$                    | 74%                |
| 6     | High temperature ( <i>T</i> ) | $T + 10\text{ }^{\circ}\text{C}$               | cooling fan turned off                   | 81%                |
| 7     | Low intensity ( <i>W</i> )    | $d \cdot 4$                                    | Distance: 12 cm                          | 70%                |
| 8     | High intensity ( <i>W</i> )   | $d / 4$                                        | Distance: 0.75 cm                        | 87%                |
| 9     | Big Scale                     | n.20                                           | 6 mmol of 1a                             | 52%                |

<sup>a</sup> Isolated yield.

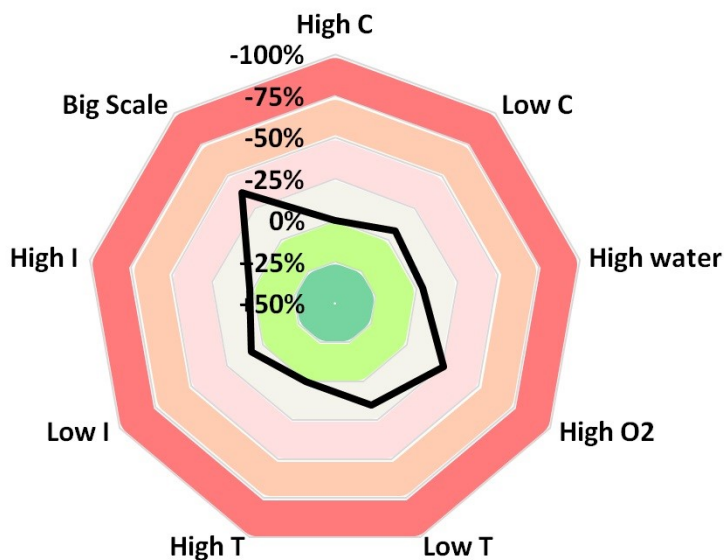

**Figure 1:** Sensitivity assessment of reaction towards concentration, water, oxygen, temperature, light intensity and large scale, is represented by a color-coded radar diagram. Deviation from standard reaction conditions is indicated by a black solid line.

### 3. General Procedure for Synthesis of Products

Silyl enol ethers **1z**,<sup>1a</sup> **1zf**,<sup>1b</sup> **1zh**,<sup>1c</sup> **1zi**,<sup>1c</sup> **1zj**<sup>1c</sup> and **1zk**<sup>1d</sup> were prepared according to synthesis procedures described in the literature.

#### 3.1 General procedure for the synthesis of silyl enol ethers.

Unless otherwise noted in the experimental procedures, the silyl enol ethers (**1b-1zg**) were prepared from the corresponding ketones according to procedures described in the literature.<sup>1e</sup>

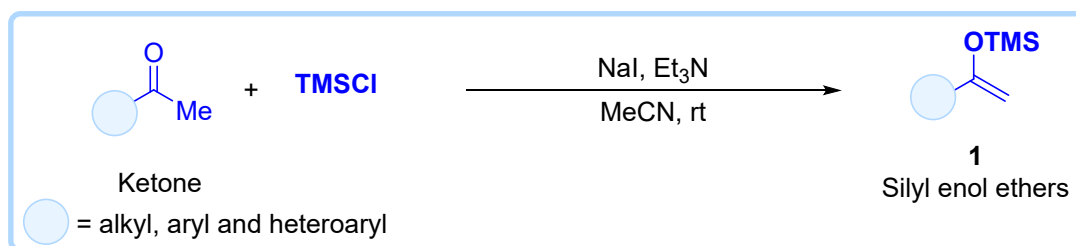

To an oven dried 100 mL round bottom flask, equipped with a magnetic stirrer, was charged with a mixture of substituted ketone (5.0 mmol, 1.0 equiv.) and anhydrous sodium iodide (899 mg, 6.0 mmol, 1.2 equiv.). The reaction vessel was evacuated and backfilled with N<sub>2</sub> (3 ×), then anhydrous MeCN (7.5 mL, 1.5

mL/mmol) was added. The round-bottom flask was stirred at rt for 5 min, and then added Et<sub>3</sub>N (1.0 mL, 7.5 mmol, 1.5 equiv), followed by chlorotrimethylsilane (0.76 mL, 6.0 mmol, 1.2 equiv). The reaction mixture was stirred for 16 h at rt, then cooled to 0 °C and quenched with a mixture of Et<sub>2</sub>O (20 mL) and saturated NH<sub>4</sub>Cl(aq) solution (20 mL). The organic layer was separated, and the aqueous layer was extracted with Et<sub>2</sub>O (2 × 20 mL). The combined organic extract was sequentially washed with ice-water (20 mL) and saturated NH<sub>4</sub>Cl(aq) solution (20 mL), dried over anhydrous MgSO<sub>4</sub>, filtered, and concentrated in vacuo. The residue was distilled under reduced pressure to provide pure silyl enol ethers.

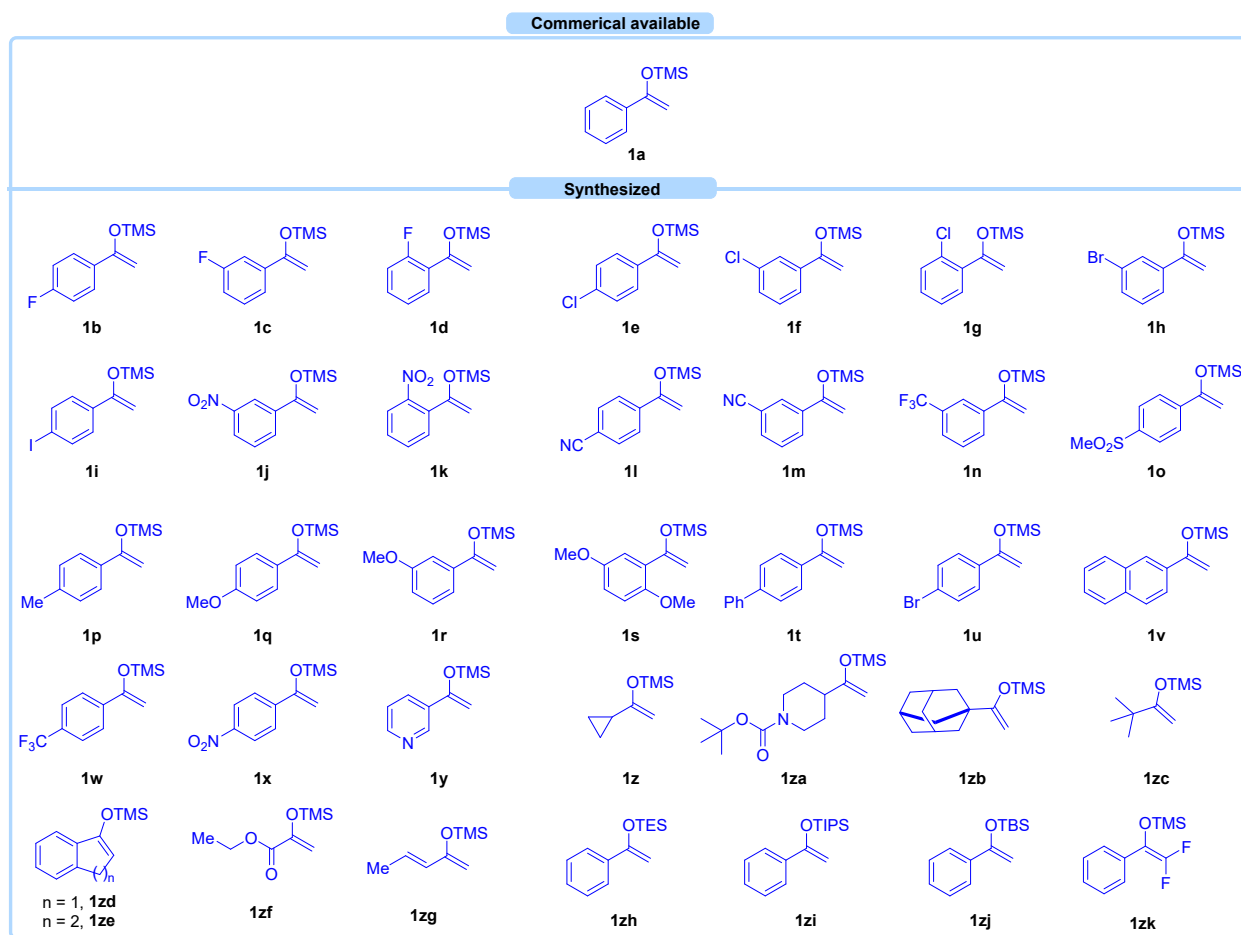

**Figure 2:** Various *O*-silyl enol ethers (1a-1zk) used in this experiment

### 3.2 General procedure for the synthesis of natural products

#### Synthesis of natural product B:<sup>2</sup>

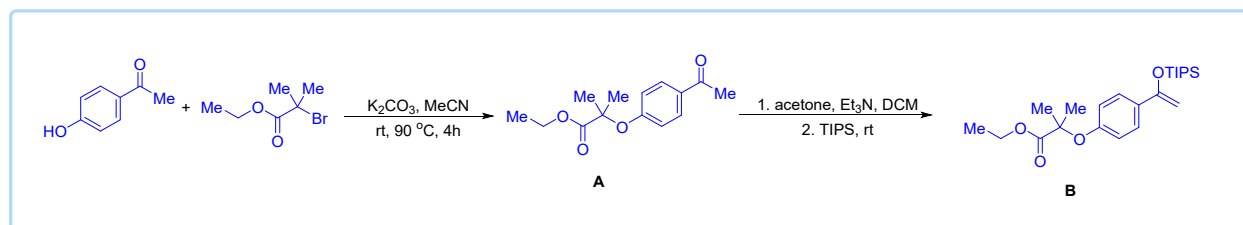

**General procedure:** Charge an oven dried 50 mL round bottom flask with 4-hydroxy acetophenone (1.0 equiv.), substituted bromoester (1.1 equiv.) and acetonitrile (25 mL). Add  $\text{K}_2\text{CO}_3$  (10.0 equiv.) and heat the reaction mixture to  $90\text{ }^\circ\text{C}$  for 4 h. Evaporate the acetonitrile in vacuo. Purify the residue by silica gel column chromatography (20% EtOAc/Hexane) to obtain the desired ketone A.

To a 50 mL round-bottom flask equipped with a stirring bar was added a solution of A (5.0 mmol) in dichloromethane (15 mL) and triethylamine (0.91 g, 9.0 mmol). The reaction mixture was stirred at room temperature for 40 min before triisopropylsilyl triflate (1.84 g, 6.0 mmol) was added slowly. Then the resulting mixture was stirred at room temperature for several minutes. Once the reaction was complete (reaction monitored by TLC), the reaction was quenched by addition of a saturated aqueous solution of  $\text{NaHCO}_3$  (20 mL) and diluted with dichloromethane (15 mL). The organic layer was washed twice with a cooled saturated aqueous solution of  $\text{NaHCO}_3$ , and dried over anhydrous  $\text{Na}_2\text{SO}_4$ , filtered, and concentrated under reduced pressure. The crude product was purified by column chromatography over on basic alumina (pH 9.09.5) eluting with petroleum ether to afford the desired silyl enol ether B.

#### Synthesis of natural product D:<sup>3</sup>

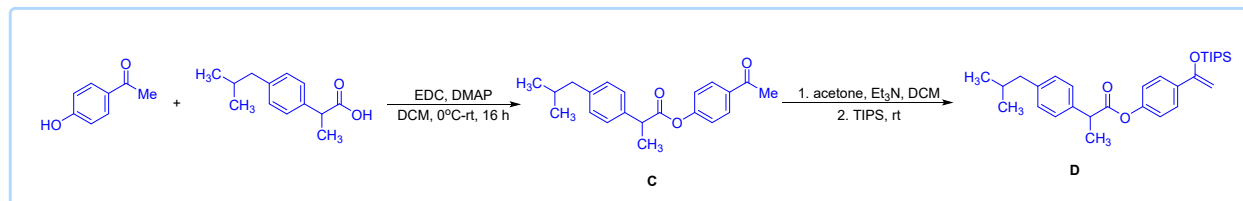

**General procedure:** EDC (2.5 equiv.) and DMAP (0.5 equiv.) were added sequentially to an ice-cold solution of the 4'-hydroxy acetophenone (1.0 equiv.) and corresponding acid (2.5 equiv.) in DCM (0.1 M). After 30 min, the ice-water cooling bath was removed, and the resulting suspension was stirred vigorously at room temperature for 16 h. Then, the reaction mixture was concentrated in vacuo. Purification by column chromatography on silica gel (n-hexane/EtOAc) afforded the desired ketone C. To a 50 mL round-bottom flask equipped with a stirring bar was added a solution of C (5.0 mmol) in dichloromethane (15 mL) and triethylamine (0.91 g, 9.0 mmol). The reaction mixture was stirred at room temperature for 40

min before triisopropylsilyl triflate (1.84 g, 6.0 mmol) was added slowly. Then the resulting mixture was stirred at room temperature for several minutes. Once the reaction was complete (reaction monitored by TLC), the reaction was quenched by addition of a saturated aqueous solution of  $\text{NaHCO}_3$  (20 mL) and diluted with dichloromethane (15 mL). The organic layer was washed twice with a cooled saturated aqueous solution of  $\text{NaHCO}_3$ , and dried over anhydrous  $\text{Na}_2\text{SO}_4$ , filtered, and concentrated under reduced pressure. The crude product was purified by column chromatography over on basic alumina eluting with hexane/EtOAc to afford the desired silyl enol ether D.

### 3.3 General procedure A for the synthesis of unsymmetrical thiosulfonates.

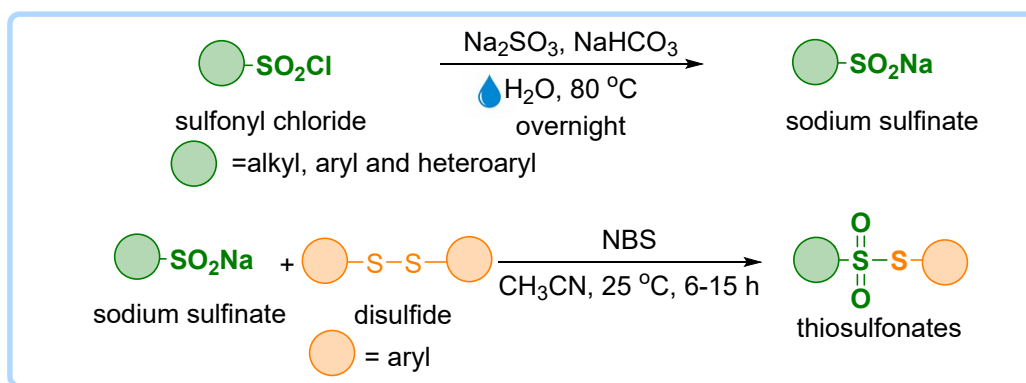

**Synthesis of sodium sulfinate salts:**<sup>4a</sup> To a oven dried 100 mL round-bottom flask, equipped with a magnetic stirrer, was charged with sulfonfyl chloride (5 mmol),  $\text{Na}_2\text{SO}_3$  (2.0 equiv.) followed by  $\text{NaHCO}_3$  (2.0 equiv.) in water (5 mL). The round-bottom flask was sealed with a rubber septa and the resulting mixture was stirred at 80 ° for 10 h. Later, the reaction was cooled to room temperature and the water was removed in a vacuum. The residue was extracted in ethanol and recrystallization from ethanol furnished the sodium sulfinates as a white or light yellow solid.

**Synthesis of thiosulfonates:**<sup>4b</sup> To a solution of sodium sulfinate (0.8 mmol) and disulfide (0.2 mmol) in  $\text{CH}_3\text{CN}$  (3.0 ml) was added NBS (0.4 mmol) while mixing. the reaction mixture was washed with water and extracted with ethyl acetate. The organic phase was separated and dried over anhydrous magnesium sulfate and filtered. The filtrate was concentrated and the resulting residue was purified by column chromatography on silica gel (300-400 mesh) with hexane-EtOAc as eluent to provide the desired unsymmetrical thiosulfonates.

### 3.4 General procedure B for the synthesis of symmetrical thiosulfonates.<sup>4c</sup>

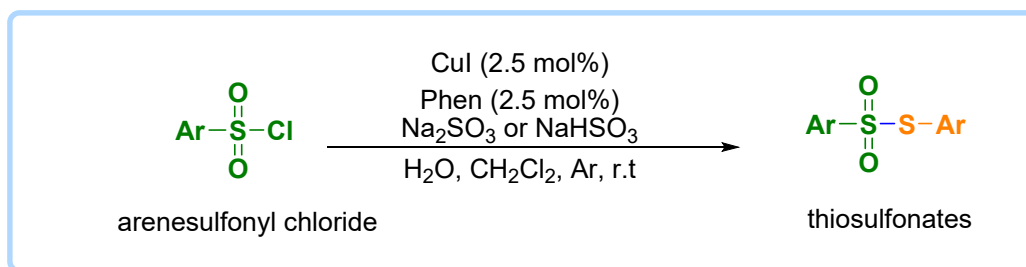

To a round-bottom flask equipped with a magnetic stir bar, aryl sulfonyl chlorides (1.0 equiv.),  $\text{Na}_2\text{SO}_3$  (3.0 equiv.), CuI (2.5 mol %) and Phenylenediamine (2.5 mol %) were added. The flask was then evacuated and flushed with argon. Degassed DCM (0.2 M) and  $\text{H}_2\text{O}$  (1.0 equiv.) were then added. The resulting mixture was stirred at room temperature overnight. After being diluted with DCM, the mixture was washed with water (three times) and brine, then dried over anhydrous  $\text{Na}_2\text{SO}_4$ . After filtration, the filtrate was concentrated by a rotary evaporator under reduced pressure. The residue was purified by column chromatography on silica gel (hexane/EtOAc = 20/1) to afford the corresponding thiosulfonates.

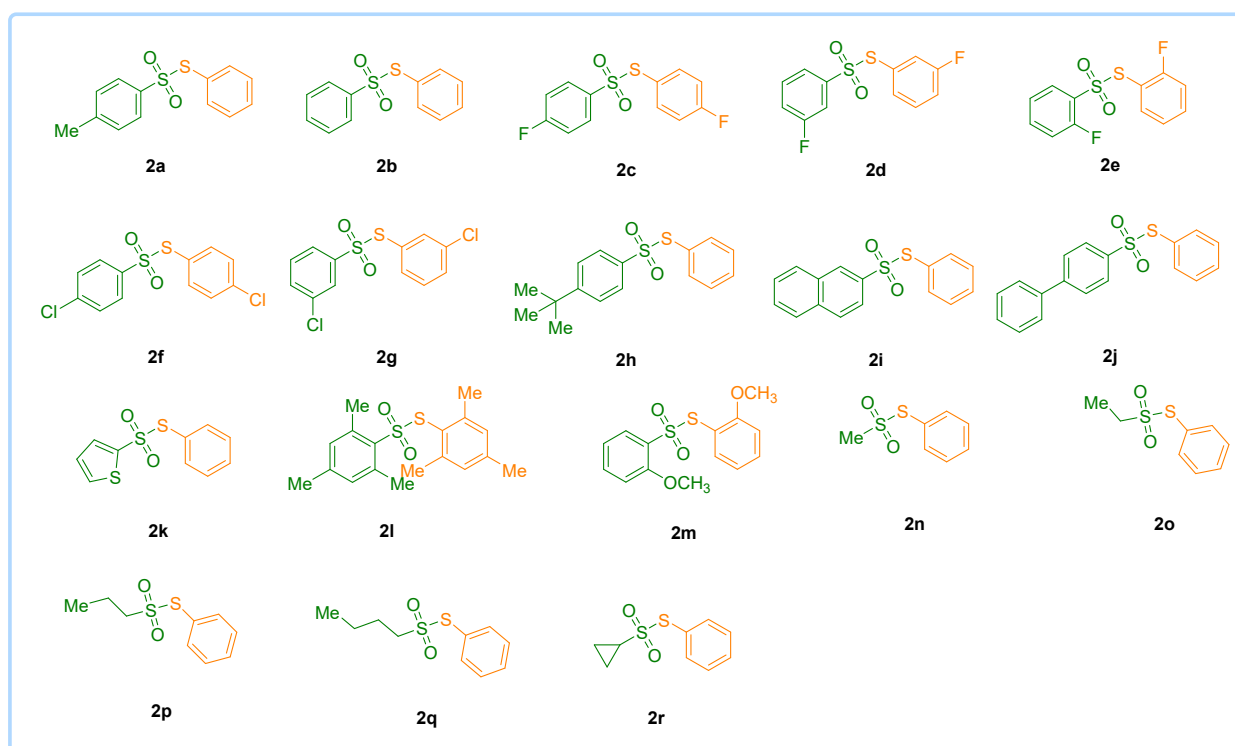

**Figure 3:** Various thiosulfonates (**2a-2r**) used in this experiment

### 3.5 General procedure A for the synthesis of $\beta$ -keto sulfones using different *O*-silyl enol ethers.

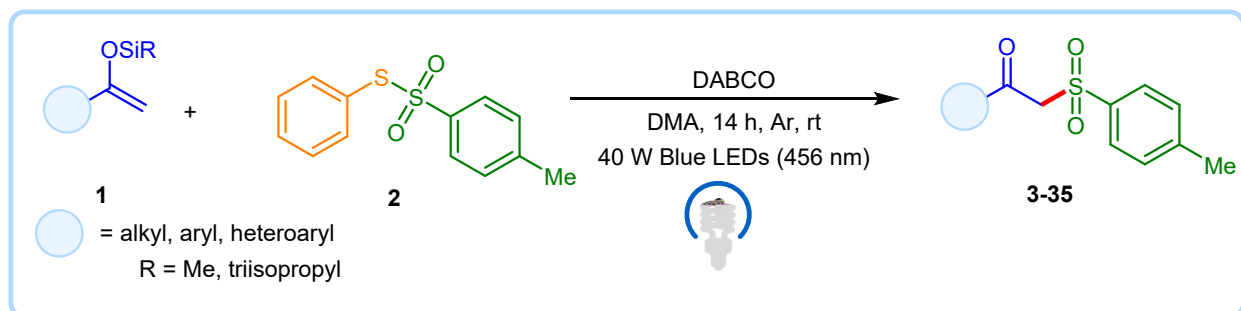

An oven-dried glass vial (10 mL) was equipped with a magnetic stir bar and charged with *O*-silyl enol ethers (0.2 mmol), *S*-phenyl-4-methylbenzenesulfonylthioate (0.24 mmol, 1.2 equiv.), DABCO (0.6 mmol, 3 equiv.). The flask was evacuated and backfilled with argon and then DMA (0.5 mL) was added. The reaction mixture was irradiated with 40 W blue LED (456 nm) at room temperature for 14 h. After the reaction, the residue was diluted with water (40 mL) and extracted with EtOAc (15 mL  $\times$  3). The combined organic phases were washed with brine (10 mL), dried over anhydrous Na<sub>2</sub>SO<sub>4</sub>, filtered, and concentrated in vacuo. The resulting residue was purified by silica gel column chromatography with hexane/EtOAc as eluent to afford the desired products **3-35**.

### 3.6 General procedure B for the synthesis of β-keto sulfones using different thiosulfonates.

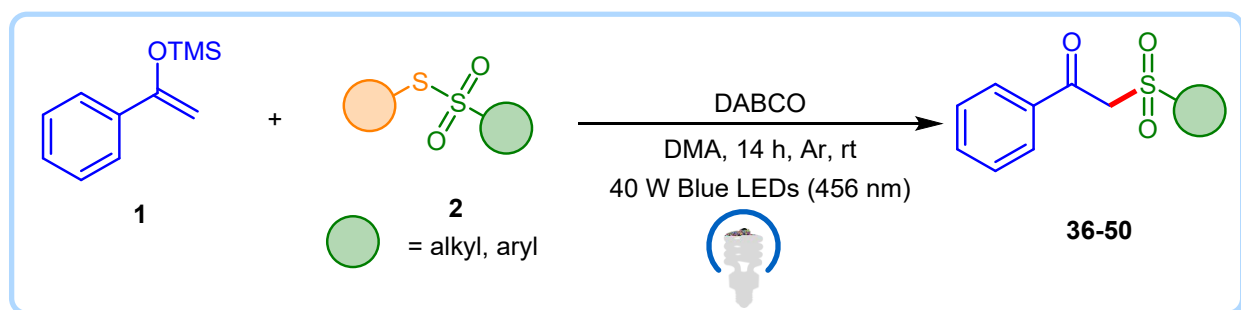

An oven-dried glass vial (10 mL) was equipped with a magnetic stir bar and charged with ((1-(4-methoxyphenyl)vinyl)oxy)trimethylsilane (0.2 mmol), thiosulfonates (0.24 mmol, 1.2 equiv.), DABCO (0.6 mmol, 3 equiv.). The flask was evacuated and backfilled with argon and then DMA (0.5 mL) was added. The reaction mixture was irradiated with 40 W blue LED (456 nm) at room temperature for 14 h. After the reaction, the residue was diluted with water (40 mL) and extracted with EtOAc (15 mL  $\times$  3). The combined organic phases were washed with brine (10 mL), dried over anhydrous Na<sub>2</sub>SO<sub>4</sub>, filtered, and concentrated in vacuo. The resulting residue was purified by silica gel column chromatography with hexane/EtOAc as eluent to afford the desired products **36-50**.

### 3.7 Unsuitable substrates



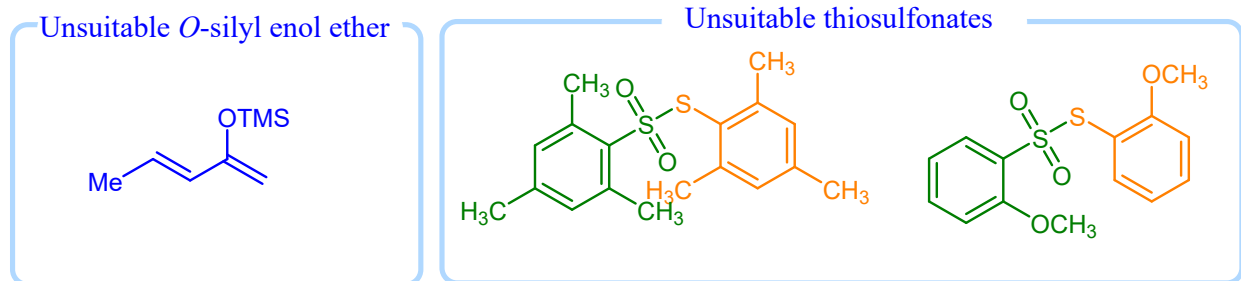

**Scheme 1:** Unsuitable substrates

#### 4. Procedure for the gram-scale synthesis of $\beta$ -keto sulfones and recyclability of PhSSPh.

The mixture of ((1-(4-methoxyphenyl)vinyl)oxy)trimethylsilane (3.0 mmol), *S*-phenyl-4-methylbenzenesulfonylthioate (3.6 mmol, 1.2 equiv.), DABCO (9.0 mmol, 3.0 equiv.) and DMA (10 mL) were sequentially added in a 100 mL round bottom flask. Then the reaction system was carried out under 40 W blue LED (456 nm) at room temperature under an Ar atmosphere for 14 h. Once completed, the mixture was diluted with water (60 mL) and extracted with EtOAc (30 mL  $\times$  3). The combined organic phases were washed with brine (30 mL), dried over anhydrous  $\text{Na}_2\text{SO}_4$ , filtered, and concentrated in vacuo. The residue was purified by silica gel chromatography using hexane/EtOAc (5:1, v/v) as eluent to afford the desired product **3a** (0.63 g, 68%) and phenyl disulfide (0.47 g, 72%).

To demonstrate the recyclability of phenyl disulfide by-product, the recovered phenyl disulfide was recycled to afford the *S*-phenyl-4-methylbenzenesulfonylthioate according to the General Procedure A, 3.3 mentioned above.

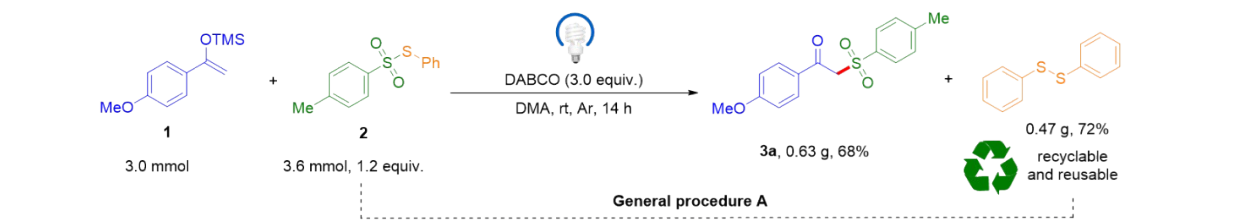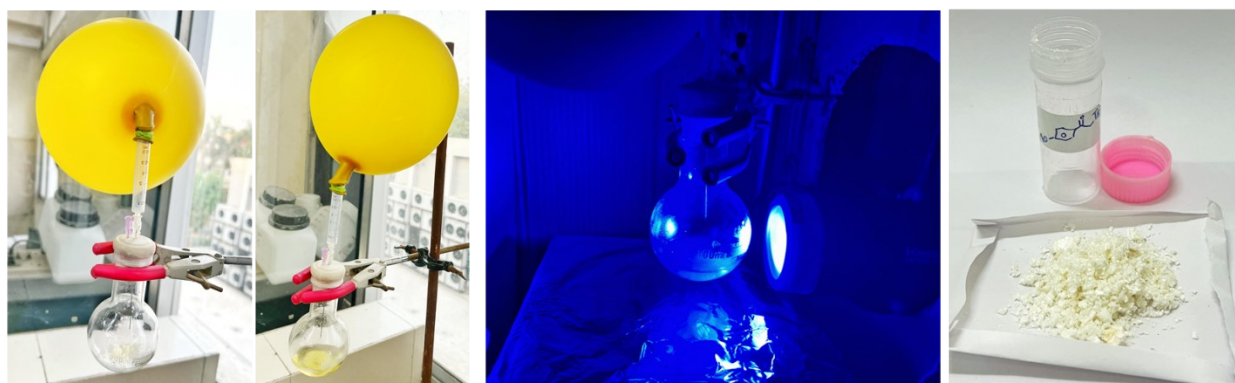

**Figure 4:** Gram-scale reaction of **3a**

#### 5. Mechanistic Studies

## 5.1 UV-visible absorption spectra

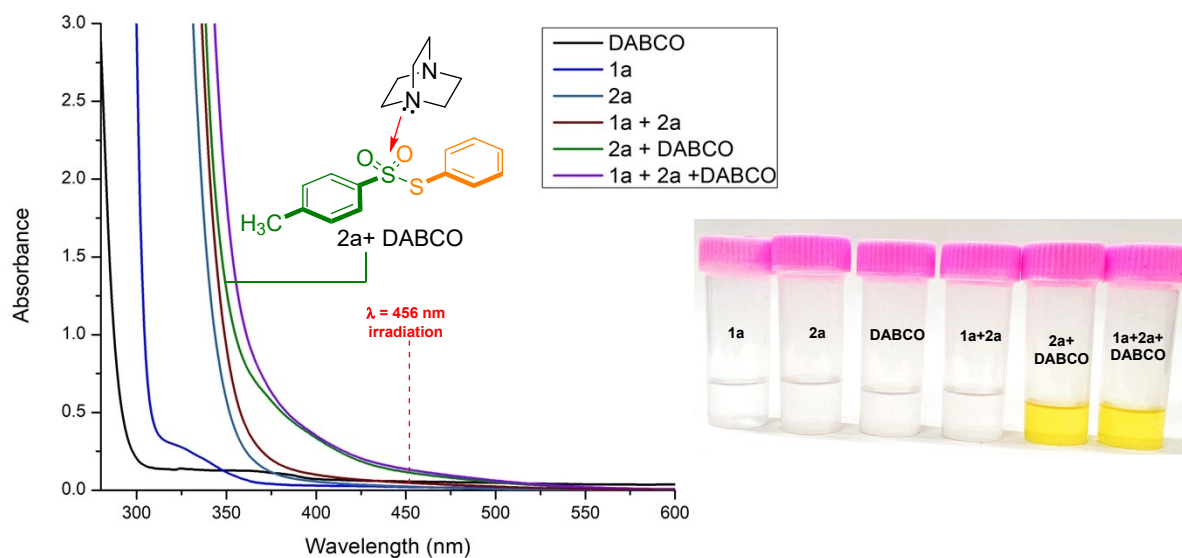

**Figure 5:** UV-visible spectra experiments measured in DMA and visual appearance of individual components and reaction mixture.

UV/vis absorption spectra was recorded using Shimadza UV-Vis 2600 spectrophotometer in the range of 200-800 nm in a 1 cm quartz cuvette. In order to identify light-absorbing species in this transformation, absorption spectra of the series of solutions were recorded (Figure 5). The results indicate, that none of the reaction components (**1a**, **2a** and DABCO) can individually absorb visible light. Combining silyl enol ether **1a** with **2a** led to just a small absorbance band in near UV region. In contrast, when aryl sulfonate S-ester **2a** in DMA was mixed with DABCO, the solution demonstrated a notable absorbance band in the visible region, thus, pointing on the possibility of the formation of an electron donor-acceptor (EDA) complex, presumably between **2a** and DABCO. Likewise, absorbance in the visible region was observed when **1a**, **2a**, and DABCO were mixed together.

The coloration of the prepared solutions additionally supports the formation of the EDA-complex (Figure 5). Individually, the components of the reaction remain clear even upon prolonged standing. In contrast, mixing **2a**, DABCO in DMA, rapidly develops the yellow color of the solution.

## 5.2 $^1\text{H}$ -NMR titration experiment

$^1\text{H}$  NMR spectra of mixtures of S-phenyl-4-methylbenzenesulfonothioate **2a** and DABCO in  $\text{CDCl}_3$  were recorded at 300 K. In an NMR tube, the total volume of the mixture was 0.6 mL, the concentration of S-phenyl-4-methylbenzenesulfonothioate **2a** (0.03 mmol) was kept constant at 0.05 M, and that of DABCO was varied from 0 to 0.2 M. The molar ratios of S-phenyl-4-methylbenzenesulfonothioate **2a**: DABCO were 1:0, 1:1, 1:2, 1:3, 1:4 in  $\text{CDCl}_3$ . The  $^1\text{H}$  NMR signal

of *S*-phenyl-4-methylbenzenesulfonothioate **2a** shifted upfield along with increasing the amount of DABCO, indicating the formation of EDA-complex between *S*-phenyl-4-methylbenzenesulfonothioate **2a** with DABCO.

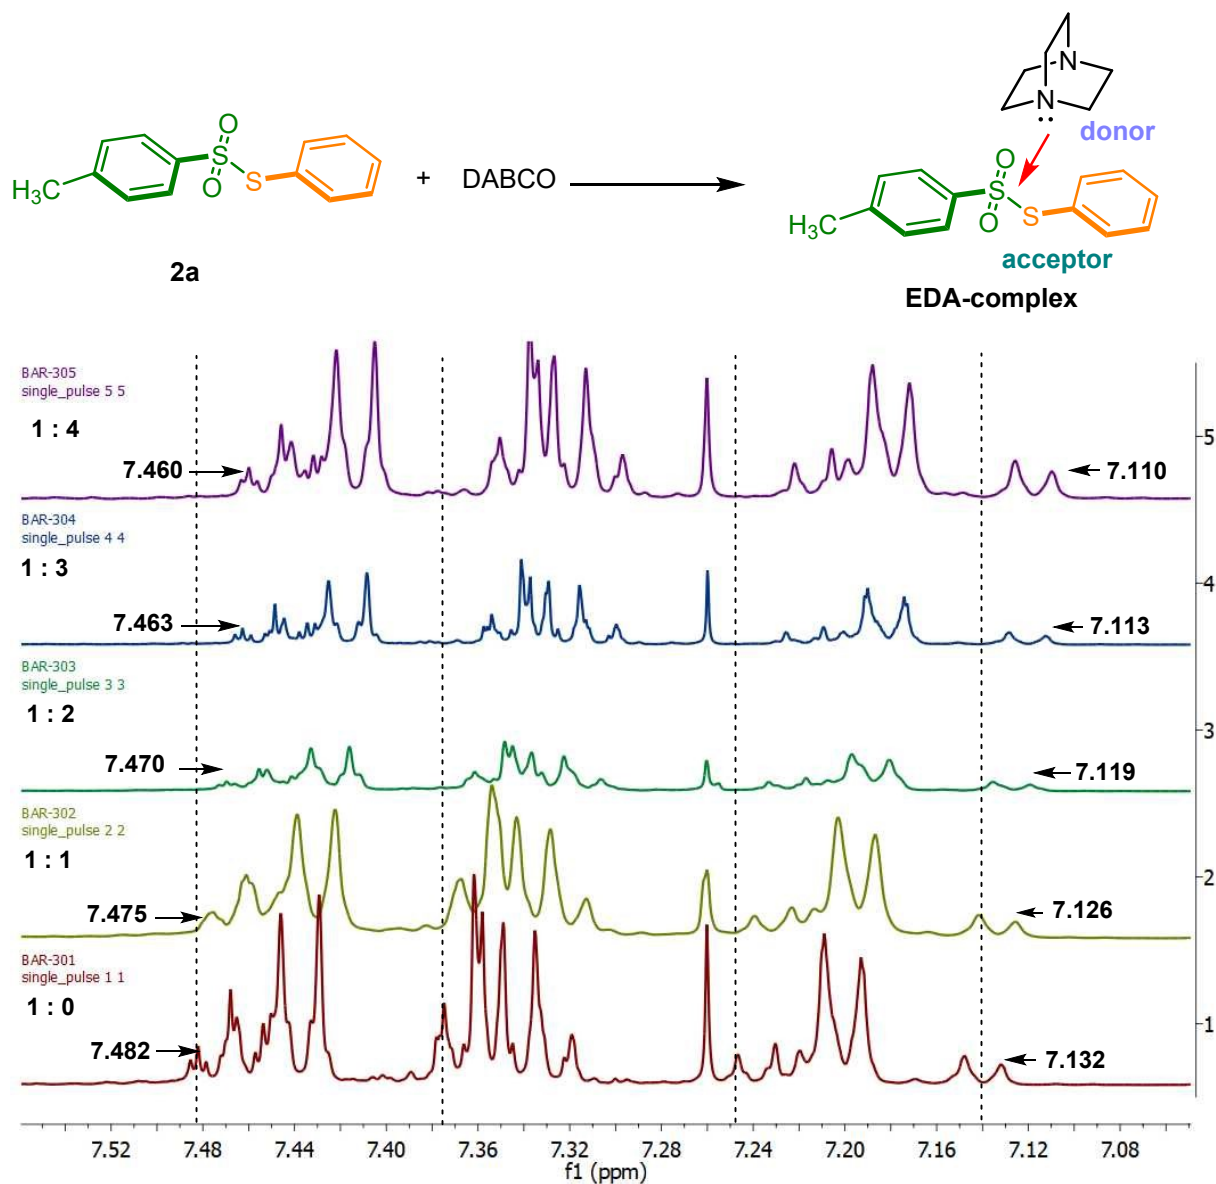

**Figure 6:** <sup>1</sup>H-NMR shift of *S*-phenyl-4-methylbenzenesulfonothioate **2a** with DABCO in aromatic region.

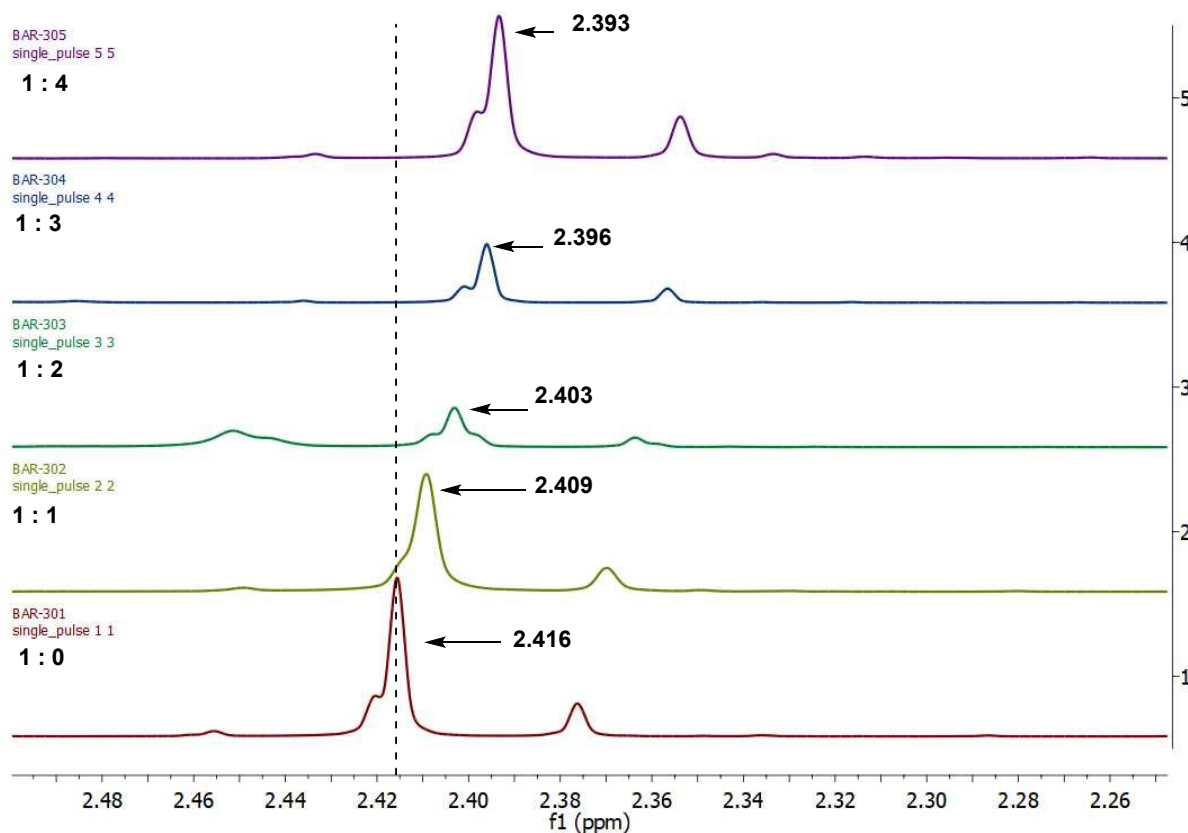

**Figure 7:**  $^1\text{H}$ -NMR shift of S-phenyl-4-methylbenzenesulfonothioate **2a** with DABCO in aliphatic region.

### 5.3 Job's plot

The stoichiometry of the EDA complex formed between S-phenyl-4-methylbenzenesulfonothioate **2a** and DABCO in DMA was determined using the Job's plot method. The Job's plot was constructed by measuring the absorption at 456 nm of DMA solutions of different ratios of **2a** and DABCO, where the total concentration of the two components remained constant (Figure 8). A parabolic curve with a maximum absorbance value at 50% mol fraction was obtained, indicating a 1:1 EDA complex between **2a** and DABCO.

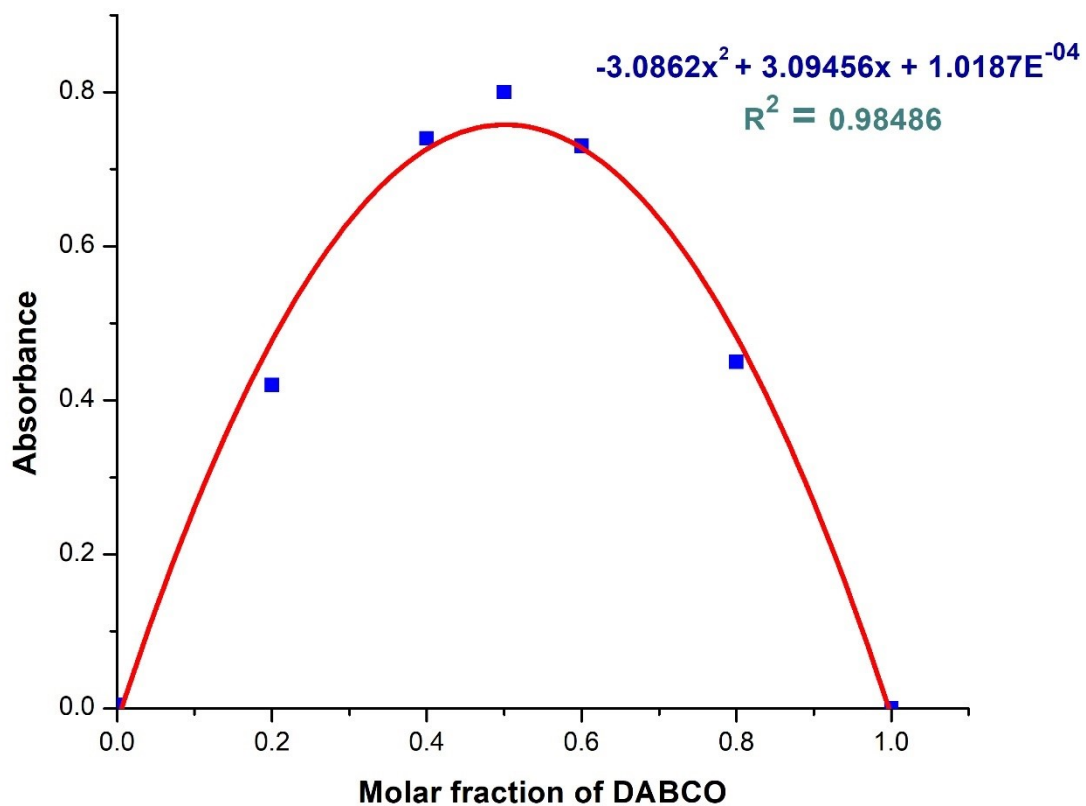

**Figure 8:** Job's plot of between *S*-phenyl-4-methylbenzenesulfonothioate **2a** and DABCO in DMA.

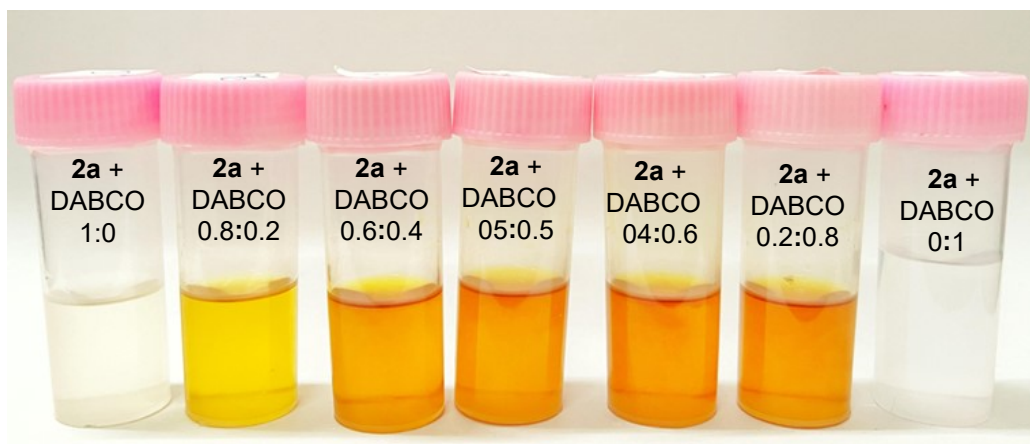

#### 5.4 Determination of association constant ( $k_{\text{EDA}}$ ):

The association constant for the EDA complex formed between *S*-phenyl-4-methylbenzenesulfonothioate **2a** and DABCO was determined by UV-vis measurements in DMA employing the Benesi Hildebrand<sup>5</sup>

method. The absorbance of a constant concentration of **2a** (0.02 M) and an increasing concentration of DABCO (0.02-0.07 M) was recorded at 456 nm. The absorption spectra shown in Figure 9 were recorded in 1 cm path quartz cuvette.

To determine the  $k_{\text{EDA}}$ , the reciprocal concentration of DABCO was plotted against the reciprocal absorbance ( $A$ ) of DABCO at 456 nm (Table 2 and Figure 9). A straight line was obtained, and by dividing the intercept through the slope:  $k_{\text{EDA}} = 4.55 \text{ M}^{-1}$  for **2a**/DABCO.

**Table 2:** Data obtained from the UV-vis absorption spectra of the EDA complex between **2a** and DABCO in DMA. The concentration of **2a** was kept at 0.02 M in DMA.

| DABCO (M) | 1/DABCO ( $\text{M}^{-1}$ ) | Abs <sub>EDA</sub> | 1/ Abs <sub>EDA</sub> -A <sub>0</sub> |
|-----------|-----------------------------|--------------------|---------------------------------------|
| 0.02      | 50                          | 0.024              | 41.54                                 |
| 0.03      | 33.3                        | 0.036              | 27.54                                 |
| 0.04      | 25                          | 0.047              | 20.97                                 |
| 0.05      | 20                          | 0.069              | 14.33                                 |
| 0.06      | 16.7                        | 0.106              | 9.43                                  |
| 0.07      | 14.3                        | 0.114              | 8.76                                  |
| 0.08      | 12.5                        | 0.131              | 7.66                                  |

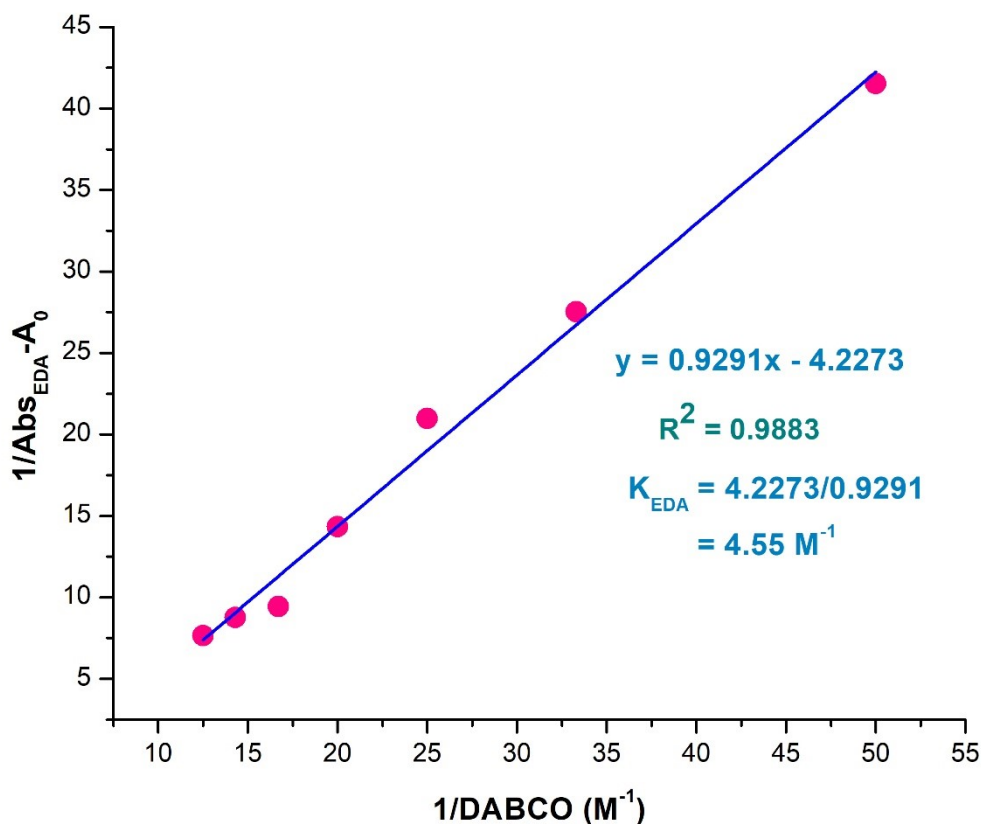

**Figure 9:** Benesi-Hildebrand plot for the EDA complex generated in DMA upon association of *S*-phenyl-4-methylbenzenesulfonothioate **2a** and DABCO.

### 5.5 Light-on/off experiment

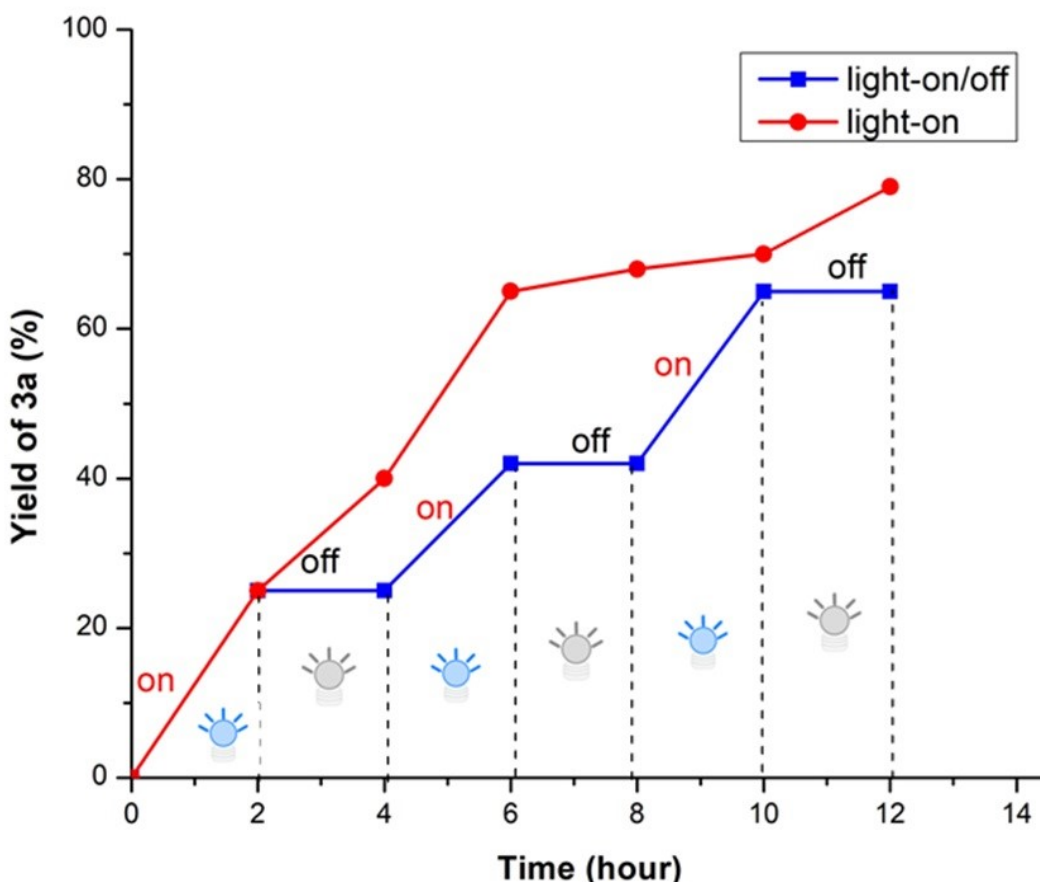

**Figure 10:** Light-on/off experiment of **1a** (0.2 mmol), **2a** (0.24 mmol, 1.2 equiv.) and DABCO (0.6 mmol, 3.0 equiv.) in DMA. The red line represents the yield of the reaction continuously irradiated with visible light. The blue line represents the yield of reaction under light turned on and off at intervals.

Six standard reaction mixtures were prepared in 10 mL vials, each containing ((1-(4-methoxyphenyl)vinyl)oxy)trimethylsilane **1a** (0.2 mmol), *S*-phenyl-4-methylbenzenesulfonothioate **2a** (0.24 mmol, 1.2 equiv.), and DABCO (0.6 mmol, 3.0 equiv.) in DMA (0.5 mL). The vials were purged with argon for 10 minutes. The reactions were then stirred and irradiated under 456 nm blue LEDs at room temperature. After 2 hours of irradiation, the blue LEDs were turned off, and one vial was removed for analysis. The remaining five vials were stirred in the dark for an additional 2 hours. At this point, another vial was removed for analysis, and the blue LEDs were turned back on to irradiate the remaining four reaction mixtures. After another 2 hours of irradiation, the blue LEDs were turned off again, and a third vial was removed for analysis. The remaining three vials were stirred in the dark for an additional 2 hours. Then, one more vial was removed for analysis, and the blue LEDs were turned on once more for 2 hours of irradiation. After this final period of light exposure, one vial was removed for analysis, leaving the last



vial to be stirred in the dark for an additional 2 hours before analysis. In Figure 10, the blue line represents the yield of the reaction during intervals of light exposure and darkness.

In continuously irradiated with blue LEDs, six standard reaction mixtures in 10 mL vial were charged with ((1-(4-methoxyphenyl)vinyl)oxy)trimethylsilane **1a** (0.2 mmol), *S*-phenyl-4-methylbenzenesulfonothioate **2a** (0.24 mmol, 1.2 equiv.), DABCO (0.6 mmol, 3.0 equiv.) in DMA (0.5 mL), and the vial was purged with Ar for 10 min. After every 2 h one tube was removed for analysis. In Figure 10 the red line represents the yield of the reaction continuously irradiated with visible light.

## 5.6 Radical Trapping Experiments

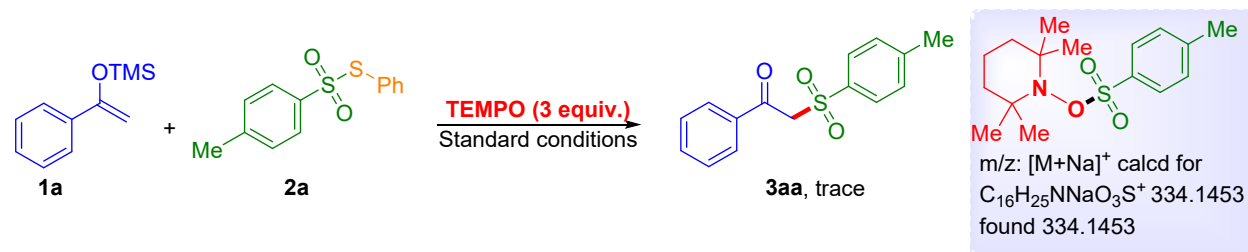

**Scheme 2:** Radical trapping experiment with TEMPO

To a glass vial, charged with a magnetic stir bar, *O*-silyl enol ethers (0.2 mmol), *S*-phenyl-4-methylbenzenesulfonothioate (0.24 mmol, 1.2 equiv.), DABCO (0.6 mmol, 3 equiv.), TEMPO (193.3 mg, 0.9 mmol, 3.0 equiv), was added. The flask was evacuated and backfilled with argon and then DMA (0.5 mL) was added. The reaction mixture was stirred and irradiated with a 456 nm Kessil LED lamp (approximately 2 cm away from the light source) at room temperature for 14 h. The reaction was completely quenched and a trace amount of product **3a** was obtained. Furthermore, the TEMPO-adduct was detected by HRMS.



## Spectrum Plot Report

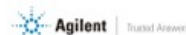

|                |                    |              |            |                 |                   |                                   |
|----------------|--------------------|--------------|------------|-----------------|-------------------|-----------------------------------|
| Name           | AS_Roshan_260924_B | Rack Pos.    | Instrument | DESKTOP-CJITEBD | Operator          | SYSTEM (SYSTEM)                   |
| Inj. Vol. (ul) | 2                  | Plate Pos.   | IRM Status | Success         | Acq. Time (Local) | 9/26/2024 10:59:13 AM (UTC+05:30) |
| Data File      | AS_Roshan_260924_B | Method (Acq) | Comment    |                 |                   |                                   |

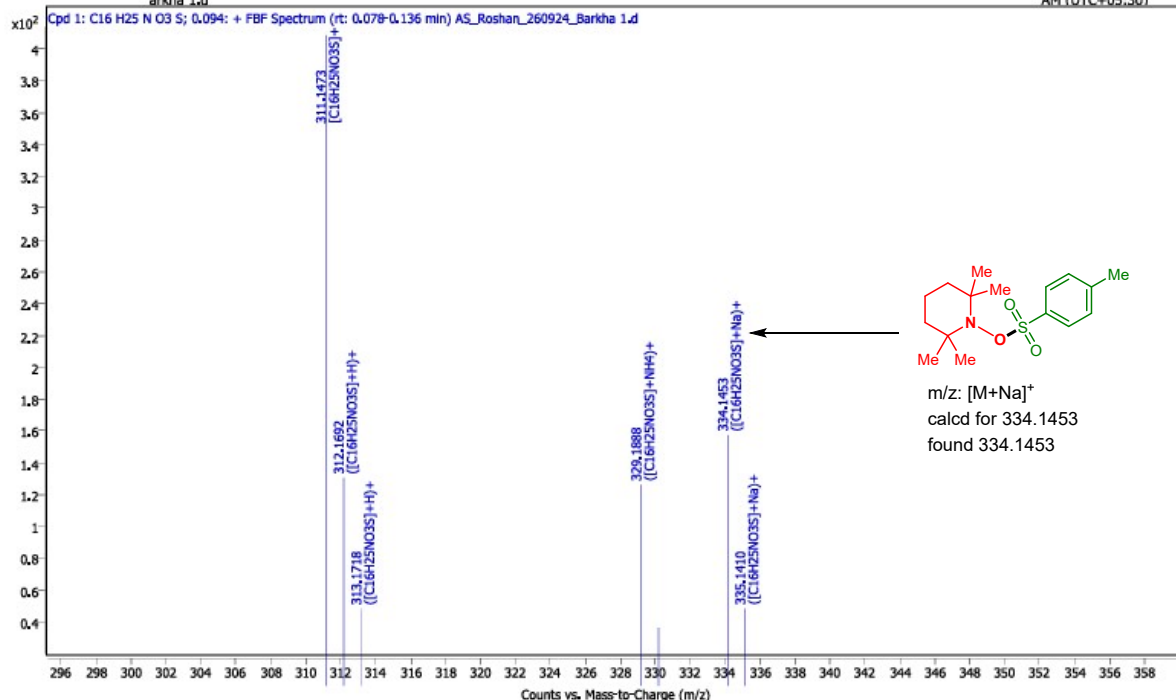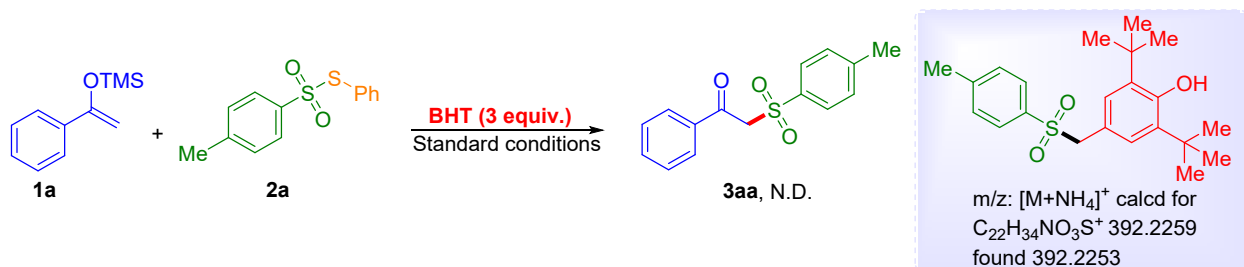

Scheme 3: Radical trapping experiment with BHT

To a glass vial, charged with a magnetic stir bar, *O*-silyl enol ethers (0.2 mmol), *S*-phenyl-4-methylbenzenesulfonylthioate (0.24 mmol, 1.2 equiv.), DABCO (0.6 mmol, 3 equiv.), BHT (193.3 mg, 0.9 mmol, 3.0 equiv.), was added. The flask was evacuated and backfilled with argon and then DMA (0.5 mL) was added. The reaction mixture was stirred and irradiated with a 456 nm Kessil LED lamp (approximately 2 cm away from the light source) at room temperature for 14 h. The reaction was completely quenched and product **3a** was not obtained. Furthermore, the BHT-adduct was detected by HRMS.

## Spectrum Plot Report

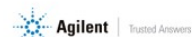

|                |                                          |            |         |                   |                      |
|----------------|------------------------------------------|------------|---------|-------------------|----------------------|
| Name           | AS_Roshan_030524_B Rack Pos.             | Instrument | LCQTOF  | Operator          | SYSTEM (SYSTEM)      |
| Inj. Vol. (ul) | 2 ar-BHT                                 | IRM Status | Success | Acq. Time (Local) | 5/3/2024 12:32:15 PM |
| Data File      | AS_Roshan_030524_B Method (Acq) ar-BHT.d | Comment    |         |                   | (UTC+05:30)          |

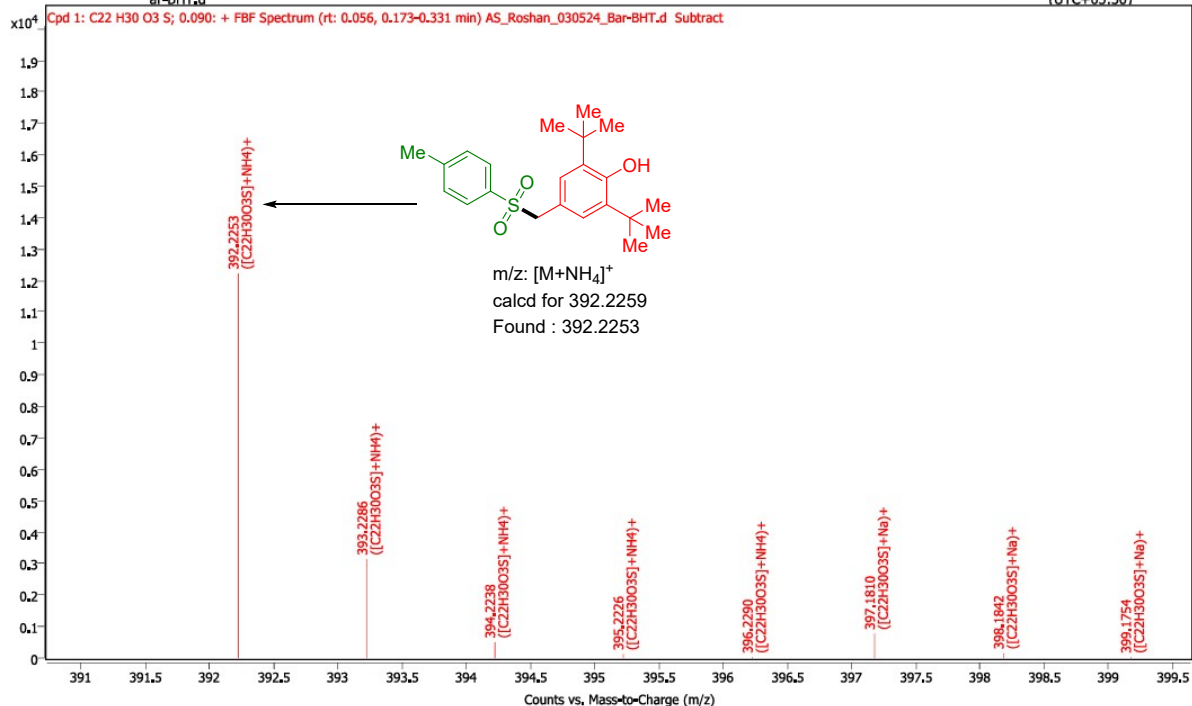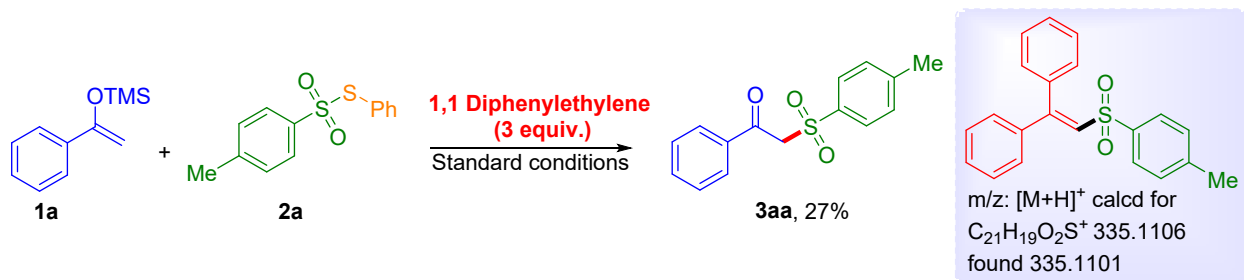

**Scheme 4:** Radical trapping experiment with 1,1-diphenylethylene

To a glass vial, charged with a magnetic stir bar, *O*-silyl enol ethers (0.2 mmol), *S*-phenyl-4-methylbenzenesulfonothioate (0.24 mmol, 1.2 equiv.), DABCO (0.6 mmol, 3 equiv.), 1,1-diphenylethylene (193.3 mg, 0.9 mmol, 3.0 equiv.), was added. The flask was evacuated and backfilled with argon and then DMA (0.5 mL) was added. The reaction mixture was stirred and irradiated with a 456 nm Kessil LED lamp (approximately 2 cm away from the light source) at room temperature for 14 h. The reaction was completely quenched and product **3a** was obtained in 27% yield. Furthermore, the DPE-adduct was detected by HRMS.

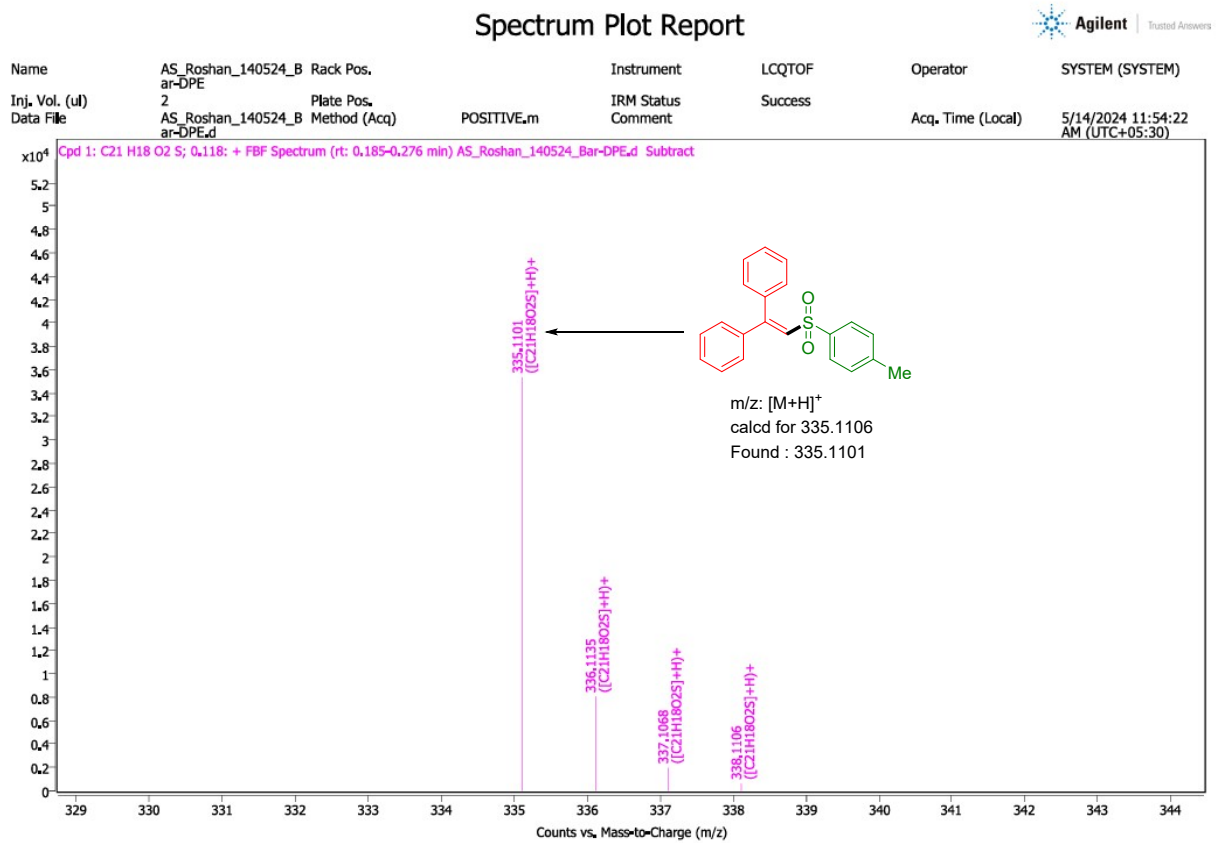

## 5.7 Irradiation with natural sunlight

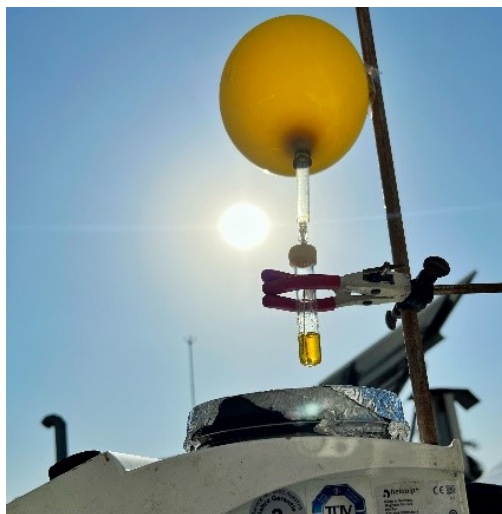

**Figure 11:** Typical reaction setup under sunlight

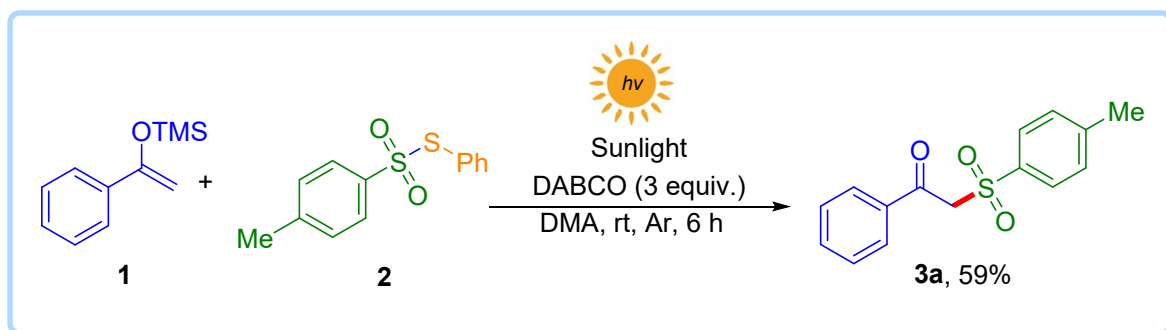

To a glass vial, charged with magnetic stir, *O*-silyl enol ethers (0.5 mmol), *S*-phenyl-4-methylbenzenesulfonothioate (0.6 mmol, 1.2 equiv.), DABCO (1.5 mmol, 3 equiv.) was added. The flask was evacuated and backfilled with argon and then DMA (1.0 mL) was added. Then the reaction was carried out under sunlight for 6 h (from 10:00 am to 16:00 pm, 26/04/2024, Roorkee, IIT Roorkee, Uttarakhand, India). After the completion of the reaction, the residue was diluted with water (40 mL) and extracted with EtOAc (15 mL  $\times$  3). The combined organic phases were washed with brine (10 mL), dried over anhydrous  $\text{Na}_2\text{SO}_4$ , filtered, and concentrated in vacuo. The resulting residue was purified by silica gel column chromatography with hexane/ethyl acetate as eluent to afford the desired products **3a** in 59% yield (80.9 mg).

### 5.8. Photochemical Quantum Yield ( $\phi$ ):

A ferrioxalate actinometer solution was prepared following the Hammond variation of the Hatchard and Parker procedure<sup>6</sup> outlined in the Handbook of Photochemistry.<sup>7</sup> Ferrioxalate actinometer solution measures the decomposition of ferric ions to ferrous ions, which are complexed by 1,10-phenanthroline and monitored by UV/Vis absorbance at 510 nm. The moles of iron-phenanthroline complex formed are related to moles of photons absorbed. The values of the quantum yield of potassium ferrioxalate are related to the concentration and wavelength.

The following solutions were prepared in the dark (flasks were wrapped in aluminum foil) and stored in the dark at room temperature:

(1) **Ferrioxalate solution** (0.012 M): Potassium ferrioxalate hydrate (147.4 mg) was added to a flask wrapped in aluminum foil containing 69.5  $\mu\text{L}$   $\text{H}_2\text{SO}_4$  (96%) to a 25 mL volumetric flask and filled to the mark with water. The flask was stirred for complete dissolution of the green solid in complete darkness. It is noteworthy that the solution should not be exposed to any incident light.

(2) **Phenanthroline solution**: 0.2% by weight of 1,10-Phenanthroline in water (50 mg in 25 mL).

(3) **Buffer solution**: to a 100 mL volumetric flask, 4.94 g of NaOAc and 1.0 mL of  $\text{H}_2\text{SO}_4$  (96%) were added and filled to the mark with water.

The absorbance of the irradiated sample. In a cuvette equipped with a stir bar was added the ferrioxalate solution (1.0 mL), and the stirred solution was irradiated for 90 s at  $\lambda = 456$  nm. After irradiation, the actinometer solution was carefully transferred into a 10 mL volumetric flask, the phen solution (0.5 mL) and 2.0 mL of buffer solution was added and the flask was filled up with water and allowed to rest for 1 h in the dark to allow the ferrous ions to coordinate completely to phen. The absorbance of the sample was measured at 510 nm to be 2.024.

A non-irradiated sample was also prepared and the absorbance at 510 nm was measured to be 0.193.

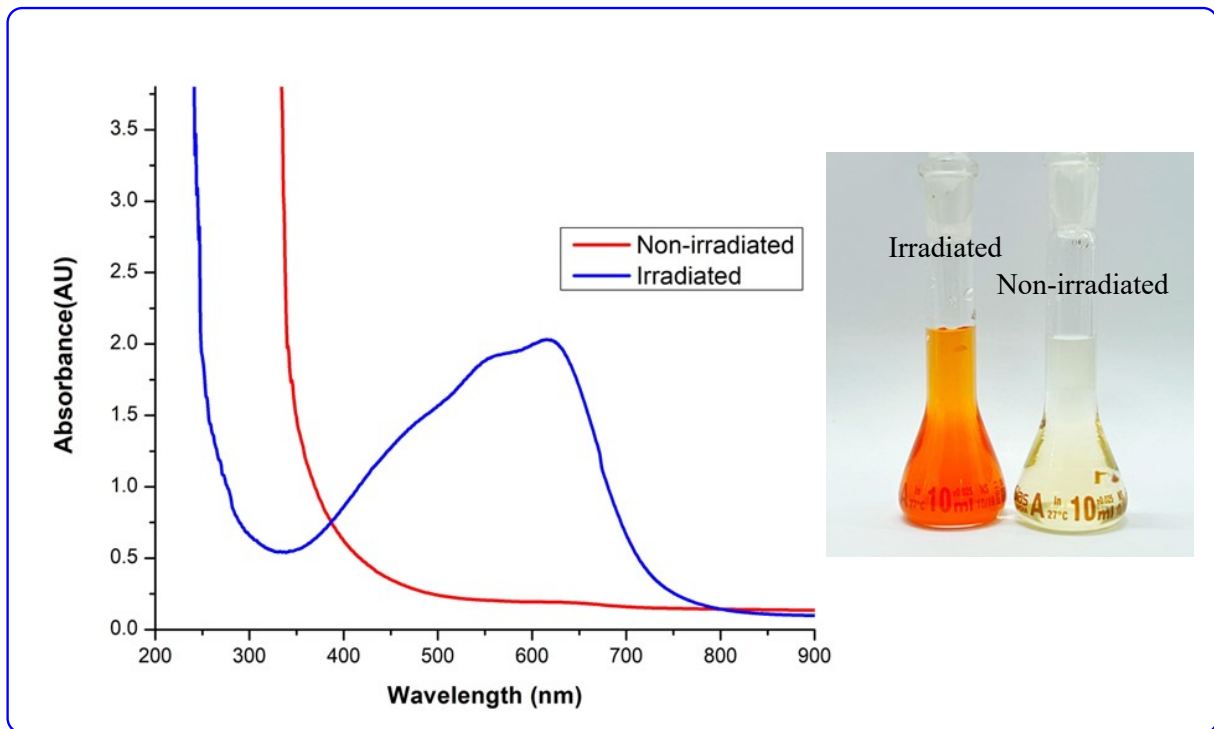

**Figure 12:** Absorption spectra for non-irradiated and irradiated samples of red  $[\text{Fe}(\text{phen})_3]^{+2}$

The quantum yield for our model photochemical reaction was determined using previously reported methods using equation 1:

$$\Phi(\text{reaction at } 456 \text{ nm}) = \frac{\text{mol of product}}{\text{mol of photon flux. } t.f} \quad (1)$$

Where,  $\Phi$  = quantum yield of the reaction,

t = time of the reaction (s),

f = incident light absorbed by the EDA Complex at 456 nm and

the photon flux is calculated by standard ferrioxalate actinometry.

The fraction of light, f, absorbed was determined according to equation 2:

$$f = 1 - 10^{-A} \quad (2)$$

here A = absorbance of the EDA Complex in DMA at 456 nm.

### Photon flux sample calculation

The photon flux is defined as shown in equation 3:

$$\text{Photon Flux} = \frac{\text{mol } Fe^{+2}}{\Phi(Fe^{+2}).t.f} \quad (3)$$

Where  $\Phi$  is the quantum yield for the ferrioxalate actinometer (1.01 at  $\lambda = 438 \text{ nm}$ ),  $t$  is the time (s), and the mol of  $Fe^{+2}$  is calculated according to equation 4.

$$\text{mol } (Fe^{+2}) = \frac{V_1.V_3.\Delta A (510 \text{ nm})}{10^3.V_2.l.\epsilon (510 \text{ nm})} \quad (4)$$

$V_1$  = irradiated volume (1 mL)  $V_2$  = aliquot of the irradiated solution taken for the determination of the ferrous ions (1 mL),  $V_3$  = final volume after complexation with phenanthroline (10 mL)  $l$  = optical path-length of the irradiation cell (1 cm)  $\Delta A$  (510 nm) = optical difference in absorbance between the irradiated solution and that taken in the dark ( $2.024 - 0.193 = 1.831$ )

$$\text{mol } (Fe^{+2}) = \frac{1 \text{ mL}.10 \text{ mL}.1.831}{10^3.1 \text{ mL}.1 \text{ cm}.11100 \text{ L mol}^{-1}.\text{cm}^{-1}} = 1.649 \times 10^{-6} \quad (4)$$

fraction of light absorbed at 456 nm for the ferrioxalate solution are calculated by eq. 2.

$$f = 1 - 10^{-2.024}$$

$$f = 0.990$$

Absorption of ferrioxalate solution at 456 nm = 2.024

The photon flux can be calculated using eq 3.

$$\text{Photon Flux} = \frac{1.649 \times 10^{-6}}{1.01 \times 90 \times 0.990} = 1.832 \times 10^{-8} \quad (3)$$

### Quantum yield determination of photochemical reaction

The quantum yield ( $\phi$ ) is calculated using eq 4.

$$\text{quantum yield (reaction at 456 nm)} = \frac{\text{mol of formed product}}{\text{mol of photon flux. } t. f} \quad (4)$$

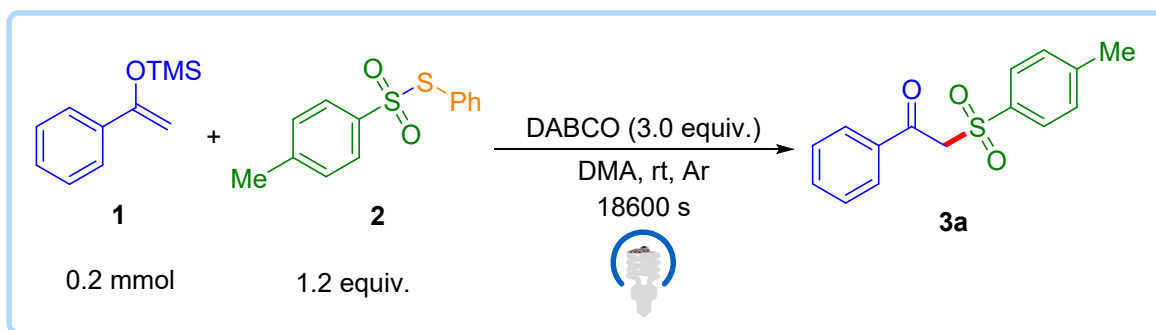

On stirring the reaction under a 456 nm kessil lamp at room temperature for 18600 sec the reaction mixture produced  $6.99 \times 10^{-5}$  of the  $\beta$ -keto sulfones.

fraction of light absorbed at 456 nm for the photocatalytic reaction

$$f = 1 - 10^{-A} \quad (2)$$

A = Absorption of photocatalytic reaction (0.125) **f = 0.2502**

$$\text{quantum yield } \Phi (\text{reaction at } 456 \text{ nm}) = \frac{6.99 \times 10^{-5}}{1.832 \times 10^{-8} \times 18600 \times 0.25}$$

$$\text{quantum yield } \Phi (\text{reaction at } 456 \text{ nm}) = 0.82$$

**Inference:** The value of quantum yield is lower than unity suggesting the possibility of a closed chain pathway for the reaction.

## 6. Calculation of green chemistry metrics

The green chemistry metrics including Atom Economy (AE), Atom Efficiency (AEf), Effective Mass Yield (EMY), Carbon efficiency, Reaction Mass Efficiency (RME), Optimum Efficiency (OE), Process Mass Intensity (PMI), Mass Intensity (MI), Mass Productivity (MP), E-factor, Solvent Intensity (SI), Water Intensity (WI), Turnover Number (TON), and Turnover Frequency (TOF) were calculated according to literature.<sup>8</sup>

### Green chemistry metrics evaluation of our method

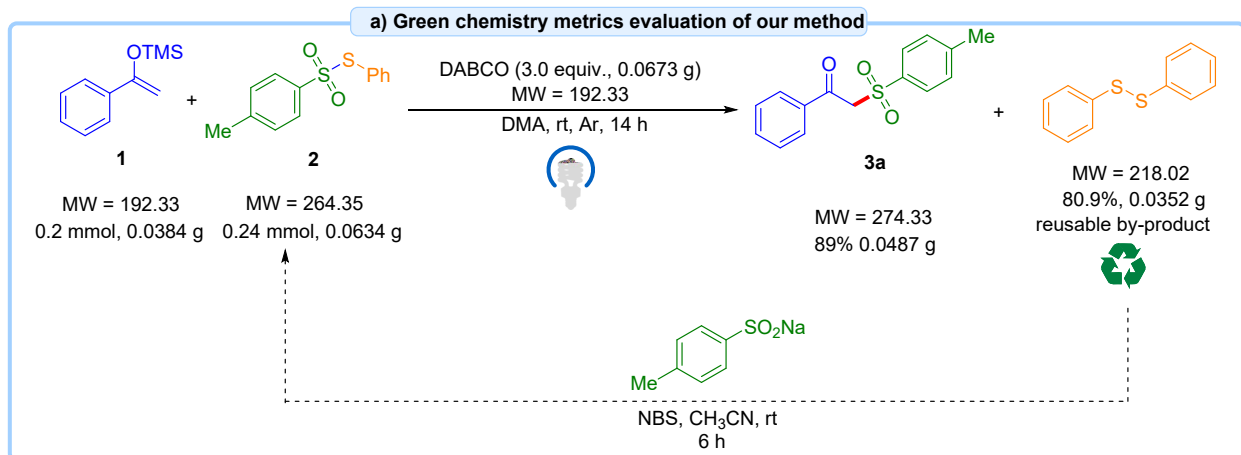

### This work

$$AE (\%) = \frac{\text{Molecular weight of product}}{\text{Total molecular weight of reactants}} \times 100 = \frac{274.334}{192.33 + (1.2 \times 264.357)} \times 100 = 96.6\%$$

$$AEt (\%) = AE \times \text{yield}\% = 96.6 \times 89\% = 85.9\%$$

$$\text{Carbon efficiency (\%)} =$$

$$= \frac{\text{moles of products} \times \text{no. of carbon of products}}{\text{moles of reactants} \times \text{no. of carbon of reactants}} \times 100 = \frac{(0.000177 \times 15) + (0.00002 \times 11) + (0.00002 \times 11)}{(0.0002 \times 11) + (0.00002 \times 11)} \times 100 = 80.92\%$$

$$RME (\%) = \frac{\text{Mass of isolated product}}{\text{Total mass of reactants}} \times 100 = \frac{0.0472 \text{ g} + 0.035 \text{ g}}{0.0384 \text{ g} + 0.0634 \text{ g}} \times 100 = 82.22\%$$

$$E - \text{factor} = \frac{\text{Total mass of wastes}}{\text{mass of product}} = \frac{0.0384 \text{ g} + 0.0634 \text{ g} + 0.47 \text{ g} + 0.0673 \text{ g} - 0.0487 \text{ g} - 0.035 \text{ g}}{0.0487 \text{ g} + 0.035 \text{ g}} = 6.7$$

$$PMI$$

$$= \frac{\text{Total mass of input material in the whole process (including solvents)}}{\text{Mass of product}} = \frac{0.0384 \text{ g} + 0.0634 \text{ g} + 0.47 \text{ g} + 0.0673 \text{ g} + 0.0487 \text{ g} + 0.035 \text{ g}}{0.0487 \text{ g} + 0.035 \text{ g}} = 7.65$$

### This work

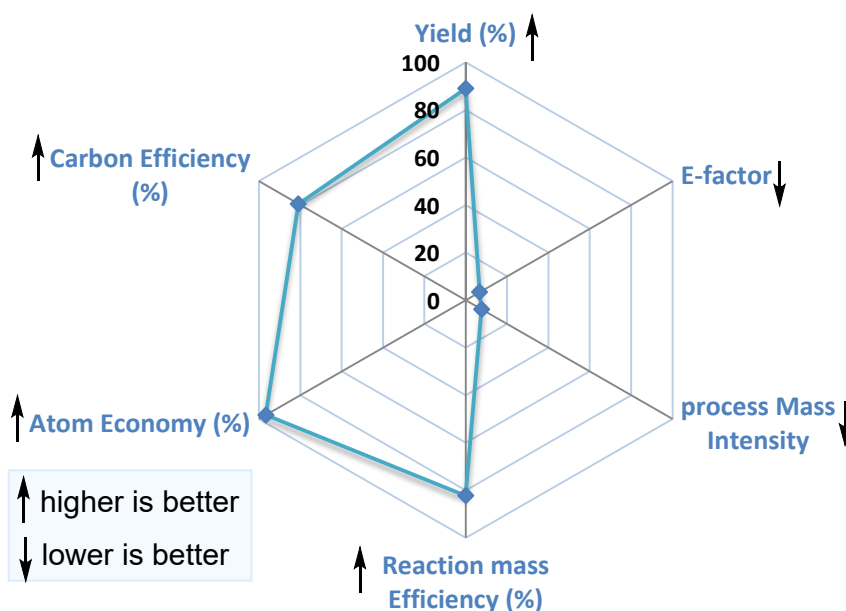

Green chemistry metrics evaluation of Ye, Wu and co-workers work<sup>9a</sup>



(b) Ye, Wu and co-workers (2019)

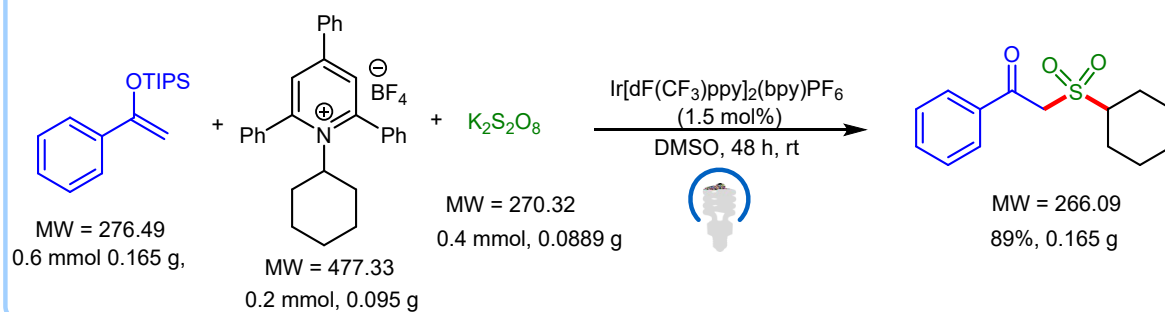

AE (%)

$$= \frac{\text{Molecular weight of product}}{\text{Total molecular weight of reactants}} \times 100 = \frac{266.0974}{477.3536 + (2 \times 222.33) + (3 \times 270.32)} \times 100 = 15.19\%$$

$$AEt (\%) = AE \times \text{yield}\% = 15.19 \times 89\% = 13.52\%$$

Carbon efficiency (%)

$$= \frac{\text{moles of products} \times \text{no. of carbon of products}}{\text{moles of reactants} \times \text{no. of carbon of reactants}} \times 100 = \frac{0.000177 \times 14}{0.0002 \times 29 + 0.0006 \times 17} \times 100 = 15.51\%$$

$$RME (\%) = \frac{\text{Mass of isolated product}}{\text{Total mass of reactants}} \times 100 = \frac{0.0472 \text{ g}}{0.0954 \text{ g} + 0.0889 \text{ g} + 0.165 \text{ g}} \times 100 = 13.51\%$$

$$E - \text{factor} = \frac{\text{Total mass of wastes}}{\text{mass of product}} = \frac{0.0954 \text{ g} + 0.0889 \text{ g} + 0.165 \text{ g} + 0.003 \text{ g} + 2.75 - 0.0472 \text{ g}}{0.0472 \text{ g}} = 64.72$$

PMI

$$= \frac{\text{Total mass of input material in the whole process (including solvents)}}{\text{Mass of product}} = \frac{0.0954 \text{ g} + 0.0889 \text{ g} + 0.165 \text{ g} + 0.003 \text{ g} + 2.75 - 0.0472 \text{ g}}{0.0472 \text{ g}} = 65.72$$

## Ye, and Wu's work (2019)

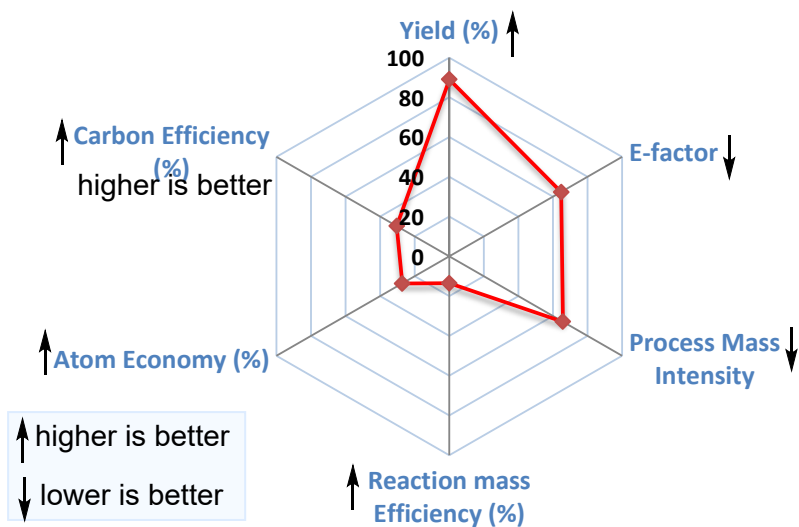

### Green chemistry metrics evaluation of Wu and co-workers work<sup>9b</sup>

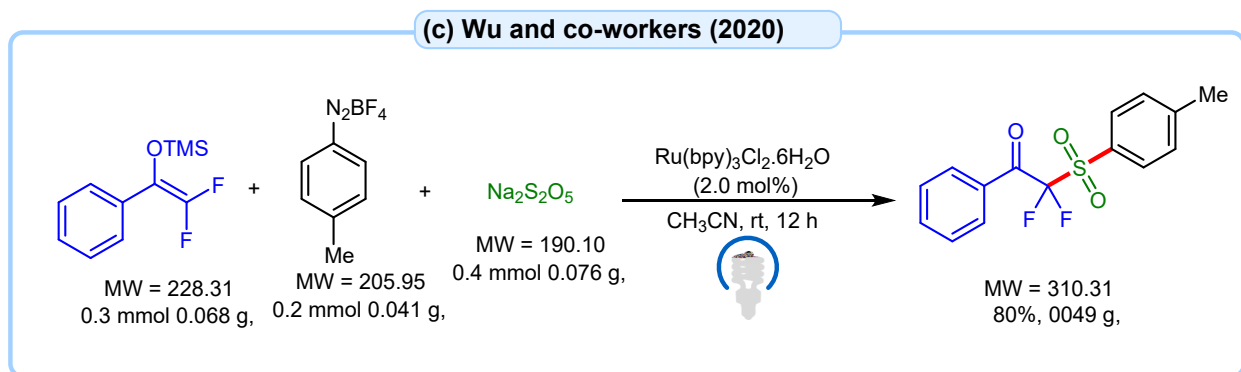

AE (%)

$$= \frac{\text{Molecular weight of product}}{\text{Total molecular weight of reactants}} \times 100 = \frac{310.3140}{205.9506 + 2 \times 190.107 + 1.5 \times 228.3138} \times 100 = 33.41\%$$

$$AEt (\%) = AE \times \text{yield}\% = 33.41 \times 80\% = 26.73\%$$

Carbon efficiency (%)

$$= \frac{\text{moles of products} \times \text{no. of carbon of products}}{\text{moles of reactants} \times \text{no. of carbon of reactants}} \times 100 = \frac{0.000157 \times 14}{0.0002 \times 7 + 0.0003 \times 11} \times 100 = 47.03\%$$

$$RME (\%) = \frac{\text{Mass of isolated product}}{\text{Total mass of reactants}} \times 100 = \frac{0.049 \text{ g}}{0.041 \text{ g} + 0.076 \text{ g} + 0.068 \text{ g}} \times 100 = 26.48\%$$

$$E - \text{factor} = \frac{\text{Total mass of wastes}}{\text{mass of product}} = \frac{0.041 \text{ g} + 0.076 \text{ g} + 0.068 \text{ g} + 0.0029 \text{ g} + 1.56 - 0.049 \text{ g}}{0.049 \text{ g}} = 34.67$$

PMI

$$= \frac{\text{Total mass of input material in the whole process (including solvents)}}{\text{Mass of product}} = 35.67$$

## Wu's work (2020)

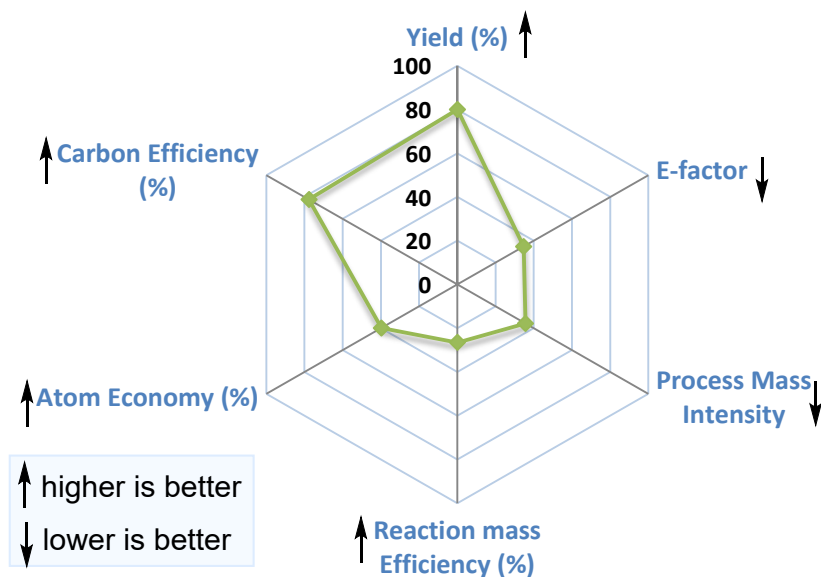

Green chemistry metrics evaluation of He, Wu and co-workers work<sup>9c</sup>

(d) He, Wu and co-workers (2022)

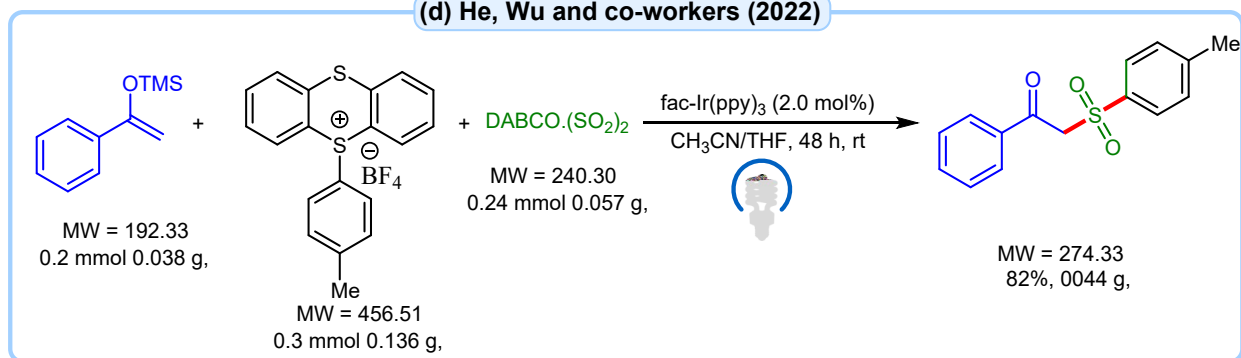

*AE (%)*

$$= \frac{\text{Molecular weight of product}}{\text{Total molecular weight of reactants}} \times 100 = \frac{274.33}{1.5 \times 456.5122 + 192.33} \times 100 = 23.54\%$$

$$AEt (\%) = AE \times \text{yield\%} = 23.54 \times 82\% = 19.30\%$$

*Carbon efficiency (%)*

$$= \frac{\text{moles of products} \times \text{no. of carbon of products}}{\text{moles of reactants} \times \text{no. of carbon of reactants}} \times 100 = \frac{1 \times 10}{4 \times 1.5 + 1} \times 100 = 25.36\%$$

$$RME (\%) = \frac{\text{Mass of isolated product}}{\text{Total mass of reactants}} \times 100 = \frac{0.0449 \text{ g}}{0.136 \text{ g} + 0.057 \text{ g} + 0.038 \text{ g}} \times 100 = 19.43\%$$

*E - factor*

$$= \frac{\text{Total mass of wastes}}{\text{mass of product}} = \frac{0.136 \text{ g} + 0.057 \text{ g} + 0.038 \text{ g} + 0.0026 \text{ g}}{0.0449 \text{ g}} = 78.59$$

*PMI*

$$= \frac{\text{Total mass of input material in the whole process (including solvent)}}{\text{Mass of product}} = \frac{0.136 \text{ g} + 0.057 \text{ g} + 0.038 \text{ g} + 0.0026 \text{ g} + 0.0449 \text{ g}}{0.0449 \text{ g}} = 79.59$$

## He, and Wu's work (2022)

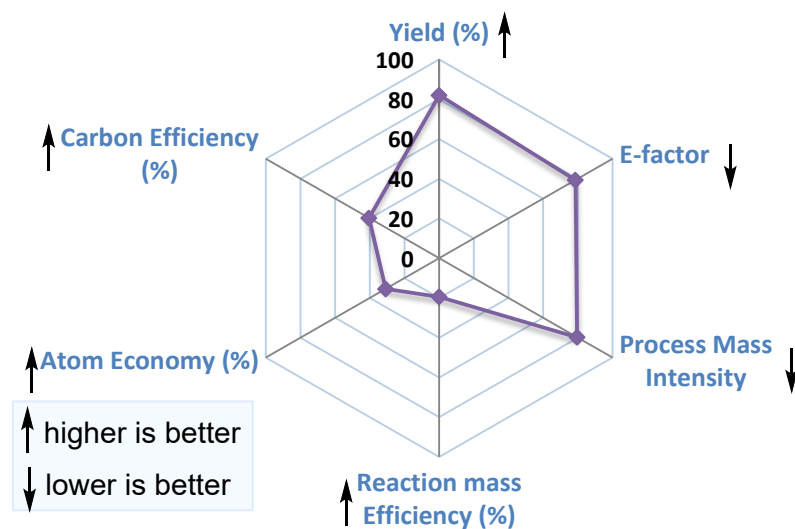

**Table 3: Green chemistry metrics summary of our method compared to reported literature<sup>9</sup>**

| Method                  | AE(%) | AEt(%) | Carbon efficiency (%) | RME(%) | E-factor | PMI  |
|-------------------------|-------|--------|-----------------------|--------|----------|------|
| This work               | 96.6  | 85.9   | 80.9                  | 82.2   | 6.7      | 7.6  |
| Ye and Wu's work (2019) | 15.1  | 13.5   | 15.5                  | 13.5   | 64.7     | 65.7 |
| Wu's work (2020)        | 33.4  | 26.7   | 47.0                  | 26.4   | 34.6     | 35.6 |
| He and Wu's work (2022) | 23.5  | 19.3   | 25.3                  | 19.4   | 78.5     | 79.5 |

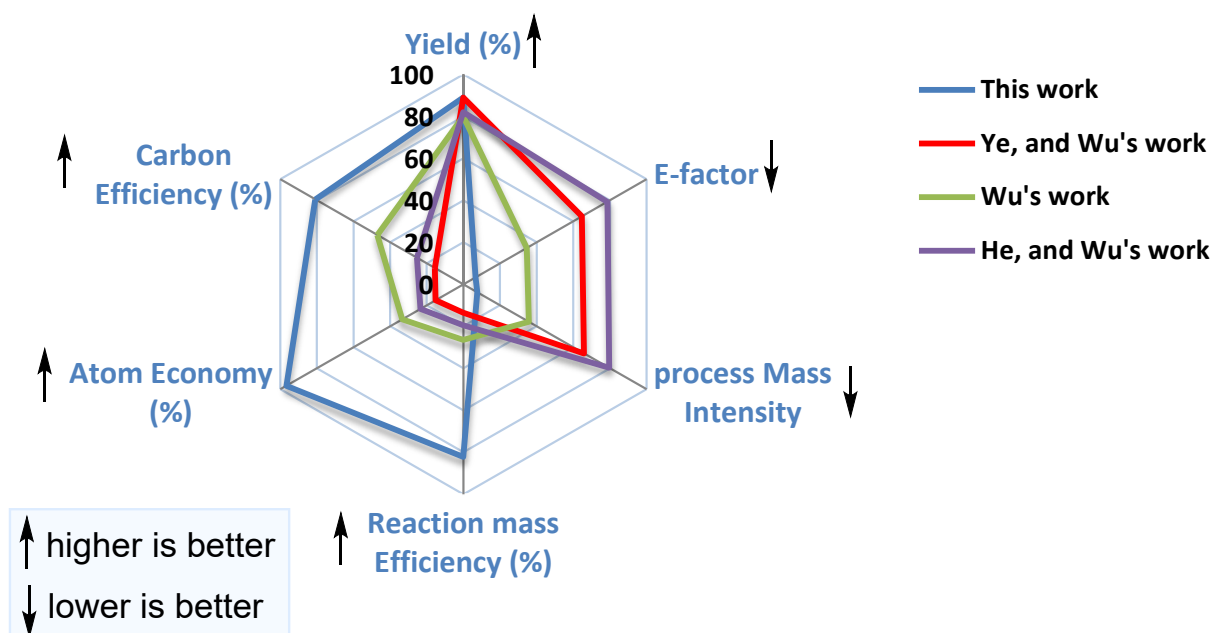

Figure 13: Summary of green chemistry metrics of our method compared to reported literature

## 7. Calculation of Ecoscale

## Calculation of EcoScale of our method

**THE ECOSCALE**  
Fast and transparent evaluation of organic preparations

Ecoscale calculator Manual Paper Contact

---

**Reagents**

☒ Link

|   | identifier*                                 | name                                   | MF*        | MW      | density | purity* | ml | g       | mmoles       | equiv.       |
|---|---------------------------------------------|----------------------------------------|------------|---------|---------|---------|----|---------|--------------|--------------|
| 1 | <input type="text" value="Name, MF or RI"/> | trimethyl((1-phenylvinyl)oxy)silane    | C11H16OSi  | 192.33  |         | 100%    | 0  | 0.0384  | 0.199656839€ | 1            |
| 2 | <input type="text" value="Name, MF or RI"/> | S-phenyl 4-methylbenzenesulfonothioate | C13H12O2S2 | 264.357 |         | 100%    | 0  | 0.06344 | 0.239978513€ | 1.201954884€ |
| 3 | <input type="text" value="Name, MF or RI"/> | 1,4-diazabicyclo[2.2.2]octane          | C6H12N2    | 112.17  |         | 100%    | 0  | 0.0673  | 0.599982169€ | 3.005066946€ |

**Products**

identifier\*:  name:  MF\*: C15H14O3S MW: 274.3340 g: 0.04877 mmoles: 0.177775995€ g theor: 0.054773 yield: 89.0402

**Conditions**

| Reagents | Name                                   | mmoles | eq. | Bp | Hazard | Price |
|----------|----------------------------------------|--------|-----|----|--------|-------|
|          | trimethyl((1-phenylvinyl)oxy)silane    | 4.09   | 1   |    |        |       |
|          | S-phenyl 4-methylbenzenesulfonothioate | 4.92   | 1.2 |    |        |       |
|          | 1,4-diazabicyclo[2.2.2]octane          | 12.3   | 3   |    |        |       |

Yield

Price / availability

Safety

Technical setup  
Possible items: Common set-up, Instruments for controlled addition of chemicals, Unconventional activation technique  
Selected items: (Inert) gas atmosphere

Temperature / time  
Possible items: Room temperature, < 1h, Room temperature, < 24h, Heating, < 1h  
Selected items: Room temperature, < 24h

Workup and purification  
Possible items: Sublimation, Liquid - liquid extraction or washing, Classical chromatography  
Selected items: Classical chromatography

**EcoScale**

Copyright 2006

**Figure 14:** EcoScale of our method

Score on **EcoScale**; > 75, Excellent; >50, Acceptable; <50, Inadequate<sup>8c</sup>

**EcoScale score = 68 (>50, it is an acceptable synthesis)**

## Calculation of EcoScale of Ye and Wu's work (2019)<sup>9a</sup>

**THE ECOSCALE**  
Fast and transparent evaluation of organic preparations

Ecoscale calculator | Manual | Paper | Contact

---

**Reagents** ☐

☒ Link

|   | Identifier*          | Name                                         | MF*             | MW       | density | purity* | ml | g        | mmoles       | equiv.       |
|---|----------------------|----------------------------------------------|-----------------|----------|---------|---------|----|----------|--------------|--------------|
| 1 | <input type="text"/> | 1-cyclohexyl-2,4,6-triphenylpyridin-1-ium te | C29H28BF4N      | 477.3536 |         | 100%    | 0  | 0.095471 | 0.2          | 1            |
| 2 | <input type="text"/> | trisopropyl((1-phenylvinyl)oxy)silane        | C17H28OSi       | 276.1909 |         | 100%    | 0  | 0.165715 | 0.6          | 2.999999999  |
| 3 | <input type="text"/> | Potassium metabisulfite                      | K2S2O5          | 222.33   |         | 100%    | 0  | 0.088932 | 0.4          | 2            |
| 4 | <input type="text"/> | Ir[dF(CF3)ppy]2(bpy)PF6                      | Ir[dF(CF3)ppy]2 | 1009.70  |         | 100%    | 0  | 0.003    | 0.0029711795 | 0.0148558977 |
| 5 | <input type="text"/> | Dimethyl sulfoxide                           | C2H6SO          | 78.13    |         | 100%    | 0  | 2.75     | 35.19774734  | 175.98873672 |

**Products** ☐

Identifier\*:  Name:  MF\*:  MW:  g:  mmoles:  g theor:  yield:

**Conditions** ☐

| Reagents | Name                                                        | mmoles | eq.    | Bp | Hazard | Price |
|----------|-------------------------------------------------------------|--------|--------|----|--------|-------|
|          | 1-cyclohexyl-2,4,6-triphenylpyridin-1-ium tetrafluoroborate | 4.23   | 1      |    |        |       |
|          | trisopropyl((1-phenylvinyl)oxy)silane                       | 12.71  | 2.99   |    |        |       |
|          | Potassium metabisulfite                                     | 8.47   | 2      |    |        |       |
|          | Ir[dF(CF3)ppy]2(bpy)PF6                                     | 0.06   | 0.01   |    |        |       |
|          | Dimethyl sulfoxide                                          | 745.71 | 175.98 |    |        |       |

Yield  -6

Price / availability  -25

Safety  0

Technical setup

Possible items: Any additional special glassware (Inert) gas atmosphere, Glove box

Selected items: Unconventional activation technique

-2

Temperature / time

Possible items: Room temperature, < 1h, Room temperature, < 24h, Heating, < 1h

Selected items: Room temperature, < 24h

-1

Workup and purification

Possible items: Sublimation, Liquid - liquid extraction or washing, Classical chromatography

Selected items: Classical chromatography, Liquid - liquid extraction or washing

-13

**EcoScale**  53

Copyright 2006

**Figure 15:** EcoScale of Ye and Wu's work (2019)

Score on **EcoScale**; > 75, Excellent; >50, Acceptable; <50, Inadequate<sup>8c</sup>

**EcoScale score = 53 (>50, it is an acceptable synthesis)**



## Calculation of EcoScale of Wu's work (2020)<sup>9b</sup>

**THE ECOSCALE**  
Fast and transparent evaluation of organic preparations

Ecoscale calculator Manual Paper Contact

---

**Reagents**

☒ Link

|   | identifier* | name                                             | MF*            | MW       | density | purity* | ml | g        | mmoles       | equiv.       |
|---|-------------|--------------------------------------------------|----------------|----------|---------|---------|----|----------|--------------|--------------|
| 1 |             | 4-methylphenyldiazonium tetrafluoroborate        | C7H7BF4N2      | 205.9506 |         | 100%    | 0  | 0.04119  | 0.2          | 1            |
| 2 |             | ((2,2-difluoro-1-phenylvinyl)oxy)trimethylsilane | C11H14F2OSi    | 228.3138 |         | 100%    | 0  | 0.068494 | 0.3          | 1.4999999999 |
| 3 |             | Sodium metabisulfite                             | Na2S2O5        | 190.107  |         | 100%    | 0  | 0.076043 | 0.4          | 2            |
| 4 |             | Ru(bpy)3Cl2.6H2O                                 | Ru(bpy)3Cl2.6H | 640.53   |         | 100%    | 0  | 0.0029   | 0.0045275006 | 0.0226375033 |
| 5 |             | Acetonitrile                                     | C2H3N          | 41.3530  |         | 100%    | 0  | 1.56     | 37.723986167 | 188.61993083 |

**Products**

| identifier* | name                                    | MF*         | MW       | g      | mmoles       | g theor  | yield         |
|-------------|-----------------------------------------|-------------|----------|--------|--------------|----------|---------------|
|             | 2,2-difluoro-1-phenyl-2-oxylethan-1-one | C15H12F2O3S | 310.3148 | 0.0499 | 0.1608044476 | 0.062063 | 80.4022000000 |

**Conditions**

| Reagents | Name                                             | mmoles | eq.    | Bp | Hazard | Price |
|----------|--------------------------------------------------|--------|--------|----|--------|-------|
|          | 4-methylphenyldiazonium tetrafluoroborate        | 4      | 1      |    |        |       |
|          | ((2,2-difluoro-1-phenylvinyl)oxy)trimethylsilane | 6.01   | 1.49   |    |        |       |
|          | Sodium metabisulfite                             | 8.01   | 2      |    |        |       |
|          | Ru(bpy)3Cl2.6H2O                                 | 0.09   | 0.02   |    |        |       |
|          | Acetonitrile                                     | 755.99 | 188.61 |    |        |       |

Yield: 80

Price / availability: -10

Safety: -25

0

Technical setup

Possible items: Common set-up, Instruments for controlled addition of chemicals, Unconventional activation technique

Selected items: Unconventional activation technique

-2

Temperature / time

Possible items: Room temperature, < 1h, Room temperature, < 24h, Heating, < 1h

Selected items: Room temperature, < 24h

-1

Workup and purification

Possible items: Sublimation, Liquid - liquid extraction or washing, Classical chromatography

Selected items: Liquid - liquid extraction or washing, Classical chromatography

-13

**EcoScale**

49

Copyright 2006

**Figure 16:** EcoScale of Wu's work (2020)

Score on **EcoScale**; > 75, Excellent; >50, Acceptable; <50, Inadequate<sup>8c</sup>

**EcoScale score = 49 (<50, it is an inadequate synthesis)**

## Calculation of EcoScale of He and Wu's work (2022)<sup>9c</sup>



Ecoscale calculator   Manual   Paper   Contact

---

**Reagents** ☐

☒ Link

|   | identifier*          | name                                          | MF*         | MW       | density | purity* | ml | g      | mmoles      | equiv.      |
|---|----------------------|-----------------------------------------------|-------------|----------|---------|---------|----|--------|-------------|-------------|
| 1 | <input type="text"/> | 5-(p-tolyl)-5H-thianthren-5-ium trifluorometh | C20H15F3O3S | 456.5122 |         | 100%    | 0  | 0.136  | 0.297910986 | 1           |
| 2 | <input type="text"/> | trimethyl((1-phenylvinyl)oxy)silane           | C11H16OSi   | 192.3330 |         | 100%    | 0  | 0.038  | 0.197573999 | 0.663198096 |
| 3 | <input type="text"/> | 1,4-Diazabicyclo[2.2.2]octane bis(sulfur dio  | C6H12N2O4S2 | 240.30   |         | 100%    | 0  | 0.057  | 0.237203495 | 0.796222717 |
| 4 | <input type="text"/> | fac-Ir(ppy)3                                  | C33H24IrN3  | 654.78   |         | 100%    | 0  | 0.0026 | 0.003970799 | 0.013328811 |
| 5 | <input type="text"/> | Tetrahydrofuran                               | C4H8O       | 72.11    |         | 100%    | 0  | 1.776  | 24.62903896 | 82.67247620 |
| 6 | <input type="text"/> | Acetonitrile                                  | C2H3N       | 41.053   |         | 100%    | 0  | 1.5644 | 38.10683750 | 127.9135016 |

**Products** ☐

| identifier*          | name                        | MF*       | MW       | g      | mmoles      | g theor  | yield       |
|----------------------|-----------------------------|-----------|----------|--------|-------------|----------|-------------|
| <input type="text"/> | 1-phenyl-2-tosylethan-1-one | C15H14O3S | 274.3340 | 0.0449 | 0.163669104 | 0.081727 | 54.93900000 |

**Conditions** ☐

| Reagents | Name                                                      | mmoles | eq.    | Bp | Hazard | Price |
|----------|-----------------------------------------------------------|--------|--------|----|--------|-------|
|          | 5-(p-tolyl)-5H-thianthren-5-ium trifluoromethanesulfonate | 6.63   | 1      |    |        |       |
|          | trimethyl((1-phenylvinyl)oxy)silane                       | 4.4    | 0.66   |    |        |       |
|          | 1,4-Diazabicyclo[2.2.2]octane bis(sulfur dioxide)         | 5.28   | 0.79   |    |        |       |
|          | fac-Ir(ppy)3                                              | 0.08   | 0.01   |    |        |       |
|          | Tetrahydrofuran                                           | 548.53 | 82.67  |    |        |       |
|          | Acetonitrile                                              | 848.7  | 127.91 |    |        |       |

Yield

Price / availability

Safety

Technical setup

| Possible items                                   | Selected items                      |    |
|--------------------------------------------------|-------------------------------------|----|
| Common set-up                                    | Unconventional activation technique | -2 |
| Instruments for controlled addition of chemicals |                                     |    |
| Unconventional activation technique              |                                     |    |

Temperature / time

| Possible items          | Selected items          |    |
|-------------------------|-------------------------|----|
| Room temperature, < 1h  | Room temperature, < 24h | -1 |
| Room temperature, < 24h |                         |    |
| Heating, < 1h           |                         |    |

Workup and purification

| Possible items                        | Selected items                        |     |
|---------------------------------------|---------------------------------------|-----|
| Sublimation                           | Classical chromatography              | -13 |
| Liquid - liquid extraction or washing | Liquid - liquid extraction or washing |     |
| Classical chromatography              |                                       |     |

**EcoScale**

Copyright 2006

**Figure 17:** EcoScale of He and Wu's work (2022)

Score on **EcoScale**; > 75, Excellent; >50, Acceptable; <50, Inadequate<sup>8c</sup>

**EcoScale score = 45 (<50, it is an inadequate synthesis)**

<https://ecoscale.cheminfo.org/>

summary of EcoScale of our method compared to reported literature

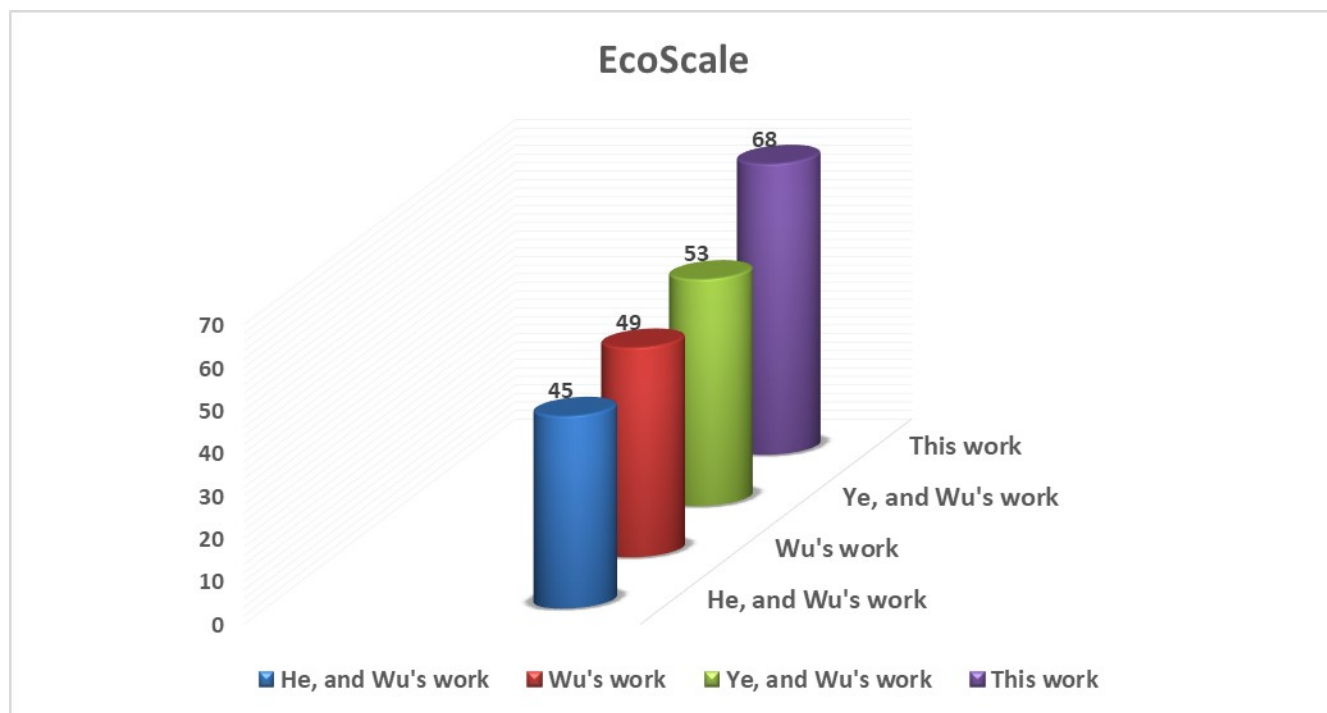

Figure 18: Summary of EcoScale compared to this work

## 8. NMR data

### 8.1 Characterization data of products

**1-phenyl-2-tosylethan-1-one (3):**

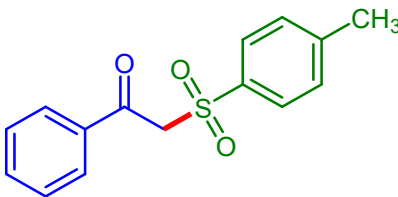

The titled compound was synthesized according to the general procedure **A** and was obtained as a white solid.

**Yield:** 89% (48.8 mg).

**R<sub>f</sub>:** 0.37 (Mobile phase: 20% EtOAc in Hexane).

**mp:** 97-98 °C.

**<sup>1</sup>H NMR** (500 MHz, CDCl<sub>3</sub>, 300 K): δ (ppm) = 7.91 (d, J = 8.0 Hz, 2H), 7.74 (d, J = 8.0 Hz, 2H), 7.58 (t, J = 7.0 Hz, 1H), 7.44 (t, J = 7.5 Hz, 2H), 7.30 (d, J = 8.0 Hz, 2H), 4.72 (s, 2H), 2.40 (s, 3H).

**<sup>13</sup>C NMR** (126 MHz, CDCl<sub>3</sub>, 300 K): δ (ppm) = 188.3, 145.5, 135.9, 135.8, 134.4, 129.9, 129.4, 128.9, 128.7, 63.6, 21.8.

**HRMS-ESI** (m/z) calc'd for C<sub>15</sub>H<sub>14</sub>NaO<sub>3</sub>S: [M+Na]<sup>+</sup>, 297.0561; Found, 297.0557.

**<sup>1</sup>H** and **<sup>13</sup>C NMR** of the product are in agreement with the literature.<sup>10a</sup>

**1-(4-fluorophenyl)-2-tosylethan-1-one (4):**

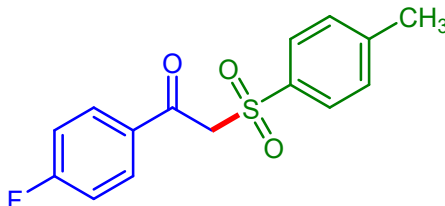

The titled compound was synthesized according to the general procedure **A** and was obtained as a white solid.

**Yield:** 73% (42.7 mg).

**R<sub>f</sub>:** 0.38 (Mobile phase: 20% EtOAc in Hexane).

**mp:** 138-139°C.

**<sup>1</sup>H NMR** (500 MHz, CDCl<sub>3</sub>, 300 K): δ (ppm) = 8.01 – 7.94 (m, 2H), 7.74 (dt, J = 8.5, 2.0 Hz, 2H), 7.32 (d, J = 8.0 Hz, 2H), 7.17-7.09 (m, 2H), 4.69 (s, 2H), 2.43 (s, 3H).

**<sup>13</sup>C NMR** (126 MHz, CDCl<sub>3</sub>, 300 K): δ (ppm) = 186.7, 166.5 (d, J = 258.2 Hz), 145.6, 135.7, 132.4 (d, J = 10.1 Hz), 130.0, 128.6, 116.2 (d, J = 22.1 Hz), 63.7, 21.8.

**<sup>19</sup>F NMR** (472 MHz, CDCl<sub>3</sub>, 300K): δ (ppm) = -102.4

**HRMS-ESI** (m/z) calc'd for C<sub>15</sub>H<sub>13</sub>FNao<sub>3</sub>S: [M+Na]<sup>+</sup>, 315.0467; Found, 315.0461.

**<sup>1</sup>H** and **<sup>13</sup>C NMR** of the product are in agreement with the literature.<sup>10a</sup>

**1-(3-fluorophenyl)-2-tosylethan-1-one (5):**

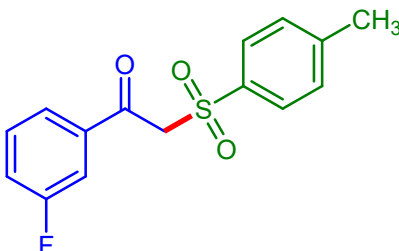

The titled compound was synthesized according to the general procedure **A** and was obtained as a white solid.

**Yield:** 69% (40.3 mg).

**R<sub>f</sub>:** 0.42 (Mobile phase: 20% EtOAc in Hexane).

**mp:** 103-104 °C.

**<sup>1</sup>H NMR** (500 MHz, CDCl<sub>3</sub>, 300 K): δ (ppm) = 7.77 – 7.72 (m, 3H), 7.59 (dt, *J* = 9.5, 2.0 Hz, 1H), 7.49 – 7.43 (m, 1H), 7.33 (d, *J* = 8.5 Hz, 2H), 7.31-7.28 (m, 1H), 4.70 (s, 2H), 2.43 (s, 3H).

**<sup>13</sup>C NMR** (126 MHz, CDCl<sub>3</sub>, 300 K): δ (ppm) = 187.1 (d, *J* = 3.4 Hz), 162.8 (d, *J* = 247.4 Hz), 145.7, 137.8 (d, *J* = 6.8 Hz), 135.6, 130.7 (d, *J* = 7.9 Hz), 130.0, 128.7, 125.5, 121.5 (d, *J* = 21.5 Hz), 115.9 (d, *J* = 22.6 Hz), 63.8, 21.8.

**<sup>19</sup>F NMR** (472 MHz, CDCl<sub>3</sub>, 300K): δ (ppm) = -111.0

**HRMS-ESI** (*m/z*) calc'd for C<sub>15</sub>H<sub>13</sub>FN<sub>2</sub>O<sub>3</sub>S: [M+Na]<sup>+</sup>, 315.0467; Found, 315.0461.

**<sup>1</sup>H** and **<sup>13</sup>C NMR** of the product are in agreement with the literature.<sup>10b</sup>

**1-(2-fluorophenyl)-2-tosylethan-1-one (6):**

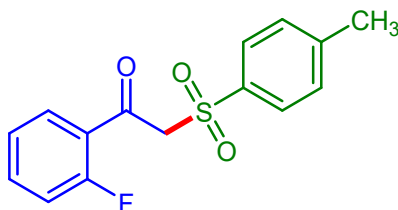

The titled compound was synthesized according to the general procedure **A** and was obtained as a white solid.

**Yield:** 65% (38.0 mg).

**R<sub>f</sub>:** 0.36 (Mobile phase: 20% EtOAc in Hexane).

**mp:** 69-70 °C.

**<sup>1</sup>H NMR** (500 MHz, CDCl<sub>3</sub>, 300 K): δ (ppm) = 7.99-7.93 (m, 3H), 7.62 (tt, *J* = 7.5, 1.0 Hz, 1H), 7.55 (t, *J* = 8.0 Hz, 2H), 7.43 (d, *J* = 8.0 Hz, 1H), 7.29 (t, *J* = 6.5 Hz, 1H), 7.23-7.15 (m, 2H), 6.79 (d, *J* = 15.5 Hz, 1H), 2.45(s, 3H).

**<sup>13</sup>C NMR** (126 MHz, CDCl<sub>3</sub>, 300 K): δ (ppm) = 140.8, 140.2, 138.3, 133.5, 131.3, 131.2, 131.1, 129.5, 128.3, 127.7, 127.0, 126.6, 19.9.

**<sup>19</sup>F NMR** (472 MHz, CDCl<sub>3</sub>, 300K): δ (ppm) = -108.9

**HRMS-ESI** (*m/z*) calc'd for C<sub>15</sub>H<sub>13</sub>FN<sub>2</sub>O<sub>3</sub>S: [M+Na]<sup>+</sup>, 315.0467; Found, 315.0462.

**<sup>1</sup>H** and **<sup>13</sup>C NMR** of the product are in agreement with the literature.<sup>10d</sup>

**1-(4-chlorophenyl)-2-tosylethan-1-one (7):**

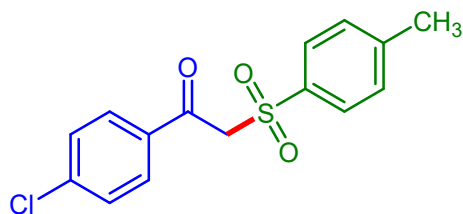

The titled compound was synthesized according to the general procedure **A** and was obtained as a white solid.

**Yield:** 79% (48.8 mg).

**R<sub>f</sub>:** 0.43 (Mobile phase: 20% EtOAc in Hexane).

**mp:** 139-140°C.

**<sup>1</sup>H NMR** (500 MHz, CDCl<sub>3</sub>, 300 K): δ (ppm) = 7.87 (dt, J = 9.0, 2.0 Hz, 2H), 7.72 (dt, J = 8.5, 2.0 Hz, 2H), 7.41 (dt, J = 9.0, 2.5 Hz, 2H), 7.31 (d, J = 7.5 Hz, 2H), 4.69 (s, 2H), 2.42 (s, 3H).

**<sup>13</sup>C NMR** (126 MHz, CDCl<sub>3</sub>, 300 K): δ (ppm) = 187.2, 145.6, 141.1, 135.7, 134.2, 130.9, 130.0, 129.3, 128.6, 63.7, 21.8.

**HRMS-ESI** (m/z) calc'd for C<sub>15</sub>H<sub>13</sub>ClNaO<sub>3</sub>S: [M+Na]<sup>+</sup>, 331.0172; Found, 331.0168.

**<sup>1</sup>H** and **<sup>13</sup>C NMR** of the product are in agreement with the literature.<sup>10b</sup>

**1-(3-chlorophenyl)-2-tosylethan-1-one (8):**

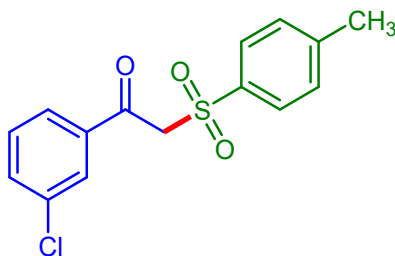

The titled compound was synthesized according to the general procedure **A** and was obtained as a white solid.

**Yield:** 72% (44.8 mg).

**R<sub>f</sub>:** 0.43 (Mobile phase: 20% EtOAc in Hexane).

**mp:** 127-128°C.

**<sup>1</sup>H NMR** (500 MHz, CDCl<sub>3</sub>, 300 K): δ (ppm) = 7.87 – 7.82 (m, 2H), 7.74 (dt, J = 8.0, 2.0 Hz, 2H), 7.59-7.55 (m, 1H), 7.45-7.40 (m, 1H), 7.33 (d, J = 7.8 Hz, 2H), 4.68 (s, 2H), 2.44 (s, 3H).

**<sup>13</sup>C NMR** (126 MHz, CDCl<sub>3</sub>, 300 K): δ (ppm) = 187.2, 145.7, 137.3, 135.6, 135.3, 134.3, 130.3, 130.0, 129.2, 128.7, 127.7, 63.8, 21.8.

**HRMS-ESI** (m/z) calc'd for C<sub>15</sub>H<sub>13</sub>ClNaO<sub>3</sub>S: [M+Na]<sup>+</sup>, 331.0172; Found, 331.0167.

**<sup>1</sup>H** and **<sup>13</sup>C NMR** of the product are in agreement with the literature.<sup>10b</sup>

**1-(2-chlorophenyl)-2-tosylethan-1-one (9):**

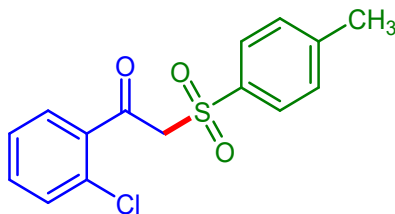

The titled compound was synthesized according to the general procedure **A** and was obtained as a white solid.

**Yield:** 43% (26.6 mg).

**R<sub>f</sub>:** 0.41 (Mobile phase: 20% EtOAc in Hexane).

**mp:** 103-104°C.

**<sup>1</sup>H NMR** (500 MHz, CDCl<sub>3</sub>, 300 K): δ (ppm) = 7.72 (d, J = 8.0 Hz, 2H), 7.50 (dd, J = 7.8, 1.5 Hz, 1H), 7.38 (td, J = 7.8, 2.0 Hz, 1H), 7.34-7.26 (m, 4H), 4.79 (s, 2H), 2.39 (s, 3H).

**<sup>13</sup>C NMR** (126 MHz, CDCl<sub>3</sub>, 300 K): δ (ppm) = 190.4, 145.5, 137.3, 136.0, 133.2, 131.6, 130.8, 130.7, 130.0, 128.6, 127.3, 66.4, 21.8.

**HRMS-ESI** (m/z) calc'd for C<sub>15</sub>H<sub>13</sub>ClNaO<sub>3</sub>S: [M+Na]<sup>+</sup>, 331.0172; Found, 331.0169.

**<sup>1</sup>H** and **<sup>13</sup>C NMR** of the product are in agreement with the literature.<sup>10a</sup>

**1-(3-bromophenyl)-2-tosylethan-1-one (10):**

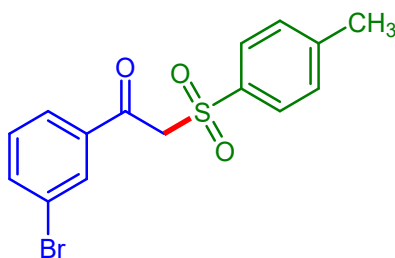

The titled compound was synthesized according to the general procedure **A** and was obtained as a white solid.

**Yield:** 57% (40.3 mg).

**R<sub>f</sub>:** 0.42 (Mobile phase: 20% EtOAc in Hexane).

**mp:** 128-129 °C.

**<sup>1</sup>H NMR** (500 MHz, CDCl<sub>3</sub>, 300 K): δ (ppm) = 7.99 (t, J = 2.0 Hz, 1H), 7.89 (d, J = 8.0 Hz, 1H), 7.76-7.71 (m, 3H), 7.39-7.31 (m, 3H), 4.68 (s, 2H), 2.45 (s, 3H).

**<sup>13</sup>C NMR** (126 MHz, CDCl<sub>3</sub>, 300 K): δ (ppm) = 187.1, 145.7, 137.5, 137.2, 135.6, 132.2, 130.5, 130.1, 128.7, 128.1, 123.2, 63.7, 21.8.

**HRMS-ESI** (m/z) calc'd for C<sub>15</sub>H<sub>13</sub>BrNaO<sub>3</sub>S: [M+Na]<sup>+</sup>, 376.9646; Found, 376.9641.

**<sup>1</sup>H** and **<sup>13</sup>C NMR** of the product are in agreement with the literature.<sup>10e</sup>

**1-(4-iodophenyl)-2-tosylethan-1-one (11):**

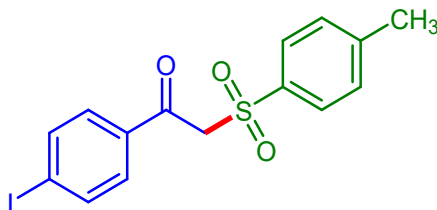

The titled compound was synthesized according to the general procedure **A** and was obtained as a white solid.

**Yield:** 81% (64.8 mg).

**R<sub>f</sub>** = 0.45 (Mobile phase: 20% EtOAc in Hexane).

**mp:** 166-167 °C.

**<sup>1</sup>H NMR** (500 MHz, CDCl<sub>3</sub>, 300 K): δ (ppm) = 7.83 (dt, J = 8.5, 2.5 Hz, 2H), 7.72 (dt, J = 8.5, 2.0 Hz, 2H), 7.64 (dt, J = 8.5, 2.5 Hz, 2H), 7.33 (d, J = 8.5 Hz, 2H), 4.67 (s, 2H), 2.44 (s, 3H).

**<sup>13</sup>C NMR** (126 MHz, CDCl<sub>3</sub>, 300 K): δ (ppm) = 187.7, 145.7, 138.3, 135.6, 135.1, 130.7, 130.0, 128.6, 103.1, 63.7, 21.9.

**HRMS-ESI** (m/z) calc'd for C<sub>15</sub>H<sub>13</sub>INaO<sub>3</sub>S: [M+H]<sup>+</sup>, 422.9528; Found, 422.9523.

**1-(3-nitrophenyl)-2-tosylethan-1-one (12):**

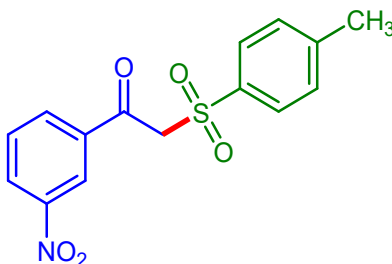

The titled compound was synthesized according to the general procedure **A** and was obtained as a white solid.

**Yield:** 55% (35.2 mg).

**R<sub>f</sub>** = 0.27 (Mobile phase: 20% EtOAc in Hexane).

**mp** = 133-134 °C.

**<sup>1</sup>H NMR** (500 MHz, CDCl<sub>3</sub>, 300 K): δ (ppm) = 8.70 (t, J = 1.5 Hz, 1H), 8.44 (d, J = 8.5 Hz, 1H), 8.31 (d, J = 8.0 Hz, 1H), 7.76 – 7.64 (m, 3H), 7.33 (d, J = 8.5 Hz, 2H), 4.77 (s, 2H), 2.43 (s, 3H).

**<sup>13</sup>C NMR** (126 MHz, CDCl<sub>3</sub>, 300 K): δ (ppm) = 186.5, 148.5, 146.0, 137.0, 135.5, 135.0, 130.3, 130.1, 128.6, 128.4, 124.2, 63.9, 21.8.

**HRMS-ESI** (m/z) calc'd for C<sub>15</sub>H<sub>13</sub>NNaO<sub>5</sub>S: [M+Na]<sup>+</sup>, 342.0412; Found, 342.0407.

**<sup>1</sup>H** and **<sup>13</sup>C NMR** of the product are in agreement with the literature.<sup>10a</sup>



**1-(2-nitrophenyl)-2-tosylethan-1-one (13):**

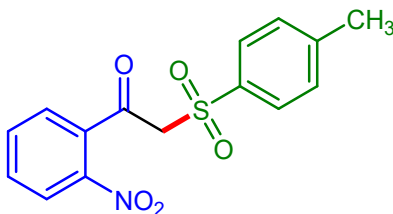

The titled compound was synthesized according to the general procedure **A** and was obtained as a yellow liquid.

**Yield:** 42% (26.8 mg).

**R<sub>f</sub>** = 0.26 (Mobile phase: 20% EtOAc in Hexane).

**<sup>1</sup>H NMR** (500 MHz, CDCl<sub>3</sub>, 300 K): δ (ppm) = 8.13 (dd, J = 8.3, 0.5 Hz, 1H), 7.82-7.74 (m, 3H), 7.68-7.63 (m, 1H), 7.61 (dd, J = 7.5, 1.5 Hz, 1H), 7.36 (d, J = 8.0 Hz, 2H), 4.59 (s, 2H), 2.45 (s, 3H).

**<sup>13</sup>C NMR** (126 MHz, CDCl<sub>3</sub>, 300 K): δ (ppm) = 190.1, 145.8, 145.3, 136.3, 135.9, 135.1, 131.7, 130.1, 129.1, 128.5, 124.3, 66.9, 21.8.

**HRMS-ESI** (m/z) calc'd for C<sub>15</sub>H<sub>13</sub>NNaO<sub>5</sub>S: [M+Na]<sup>+</sup>, 342.0412; Found, 342.0409.

**<sup>1</sup>H** and **<sup>13</sup>C NMR** of the product are in agreement with the literature.<sup>10b</sup>

**4-(2-tosylacetyl)benzonitrile (14):**

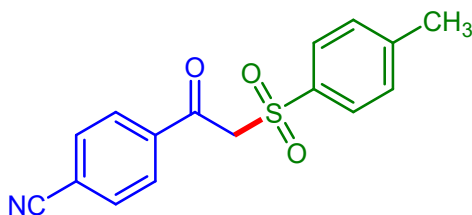

The titled compound was synthesized according to the general procedure **A** and was obtained as a white solid.

**Yield:** 78% (46.7 mg).

**R<sub>f</sub>**: 0.27 (Mobile phase: 20% EtOAc in Hexane).

**mp:** 154-155 °C.

**<sup>1</sup>H NMR** (500 MHz, CDCl<sub>3</sub>, 300 K): δ (ppm) = 8.07 (dt, J = 8.5, 1.5 Hz, 2H), 7.78 (dt, J = 8.5, 1.5 Hz, 2H), 7.73 (dt, J = 8.0, 2.0 Hz, 2H), 7.35 (d, J = 8.0 Hz, 2H), 4.73 (s, 2H), 2.45 (s, 3H).

**<sup>13</sup>C NMR** (126 MHz, CDCl<sub>3</sub>, 300 K): δ (ppm) = 187.3, 146.0, 138.6, 135.4, 132.7, 130.1, 129.9, 128.6, 117.7, 117.5, 63.9, 21.9.

**HRMS-ESI** (m/z) calc'd for C<sub>16</sub>H<sub>13</sub>NNaO<sub>3</sub>S: [M+Na]<sup>+</sup>, 322.0514; Found, 322.0508.

**<sup>1</sup>H** and **<sup>13</sup>C NMR** of the product are in agreement with the literature.<sup>10a</sup>

### 3-(2-tosylacetyl)benzonitrile (15):

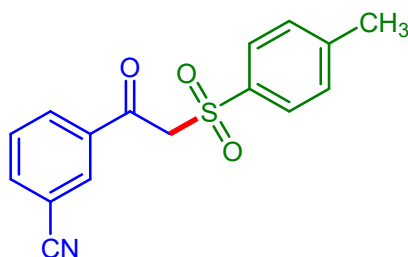

The titled compound was synthesized according to the general procedure **A** and was obtained as a white solid.

**Yield:** 85% (50.9 mg).

**R<sub>f</sub>:** 0.23 (Mobile phase: 20% EtOAc in Hexane).

**mp:** 100-101 °C.

**<sup>1</sup>H NMR** (500 MHz, CDCl<sub>3</sub>, 300 K): δ (ppm) = 8.15 (dt, J = 8.0, 1.0 Hz, 1H), 8.12 (s, 1H), 7.81 (dt, J = 6.5, 1.0 Hz, 1H), 7.70 (dt, J = 6.5, 2.0 Hz, 2H), 7.58 (t, J = 8.0 Hz, 1H), 7.29 (d, J = 8.0 Hz, 2H), 4.77 (s, 2H), 2.39 (s, 3H).

**<sup>13</sup>C NMR** (126 MHz, CDCl<sub>3</sub>, 300 K): δ (ppm) = 186.9, 145.9, 137.0, 136.5, 135.6, 133.4, 132.9, 130.1, 130.1, 128.6, 117.8, 113.3, 63.6, 21.8.

**HRMS-ESI** (m/z) calc'd for C<sub>16</sub>H<sub>13</sub>NNaO<sub>3</sub>S: [M+Na]<sup>+</sup>, 322.0514; Found, 322.0510.

**<sup>1</sup>H** and **<sup>13</sup>C NMR** of the product are in agreement with the literature.<sup>10g</sup>

### 2-tosyl-1-(3-(trifluoromethyl)phenyl)ethan-1-one (16):

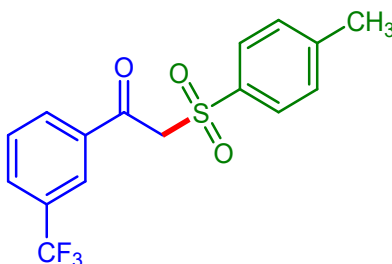

The titled compound was synthesized according to the general procedure **A** and was obtained as a white solid.

**Yield:** 87% (59.6 mg).

**R<sub>f</sub>** = 0.36 (Mobile phase: 20% EtOAc in Hexane).

**mp:** 165-166 °C.

**<sup>1</sup>H NMR** (500 MHz, CDCl<sub>3</sub>, 300 K): δ (ppm) = 8.17 (d, J = 8.0 Hz, 1H), 8.13 (s, 1H), 7.86 (t, J = 7.5 Hz, 1H), 7.74 (d, J = 8.5 Hz, 2H), 7.65 (t, J = 7.5 Hz, 1H), 7.34 (d, J = 8.0 Hz, 2H), 4.74 (s, 2H), 2.44 (s, 3H).

**<sup>13</sup>C NMR** (126 MHz, CDCl<sub>3</sub>, 300 K): δ (ppm) = 187.2, 145.9, 135.9 (d, J = 96.9 Hz), 132.7, 131.6 (d, J = 33.5 Hz), 130.7 (q, J = 4.8 Hz), 130.1, 129.7, 128.7, 126.1 (q, J = 4.0 Hz), 124.6, 122.4, 63.8, 21.8.

**<sup>19</sup>F NMR** (472 MHz, CDCl<sub>3</sub>, 300K): δ (ppm) = -62.8.

**HRMS-ESI** (m/z) calc'd for C<sub>16</sub>H<sub>13</sub>F<sub>3</sub>NaO<sub>3</sub>S: [M+Na]<sup>+</sup>, 365.0435; Found, 365.0426.

**<sup>1</sup>H** and **<sup>13</sup>C NMR** of the product are in agreement with the literature.<sup>10f</sup>

**1-(4-(methylsulfonyl)phenyl)-2-tosylethan-1-one (17):**

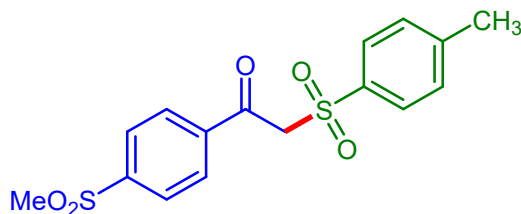

The titled compound was synthesized according to the general procedure **A** and was obtained as a white solid.

**Yield:** 74% (52.2 mg).

**R<sub>f</sub>** = 0.22 (Mobile phase: 30% EtOAc in Hexane).

**mp:** 155-156 °C.

**<sup>1</sup>H NMR** (500 MHz, CDCl<sub>3</sub>, 300 K): δ (ppm) = 8.14 (dt, *J* = 9.0, 1.5 Hz, 2H), 8.05 (dt, *J* = 8.5, 2.0 Hz, 2H), 7.74 (dt, *J* = 8.5, 2.0 Hz, 2H), 7.35 (d, *J* = 8.0 Hz, 2H), 4.75 (s, 2H), 3.10 (s, 3H), 2.45 (s, 3H).

**<sup>13</sup>C NMR** (126 MHz, CDCl<sub>3</sub>, 300 K): δ (ppm) = 187.4, 146.0, 145.2, 139.6, 135.5, 130.4, 130.1, 128.6, 128.0, 64.1, 44.3, 21.8.

HRMS-ESI (*m/z*) calc'd for C<sub>16</sub>H<sub>16</sub>NaO<sub>5</sub>S<sub>2</sub>: [M+Na]<sup>+</sup>, 375.0337; Found, 375.0334.

**1-(p-tolyl)-2-tosylethan-1-one (18):**

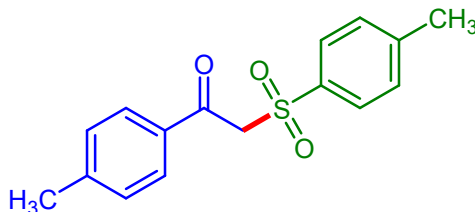

The titled compound was synthesized according to the general procedure **A** and was obtained as a white solid.

**Yield:** 90% (51.9 mg).

**R<sub>f</sub>**: 0.43 (Mobile phase: 20% EtOAc in Hexane).

**mp:** 108-109 °C.

**<sup>1</sup>H NMR** (500 MHz, CDCl<sub>3</sub>, 300 K): δ (ppm) = 7.82 (d, *J* = 8.5 Hz, 2H), 7.74 (d, *J* = 8.0 Hz, 2H), 7.30 (d, *J* = 7.5 Hz, 2H), 7.24 (d, *J* = 8.0 Hz, 2H), 4.69 (s, 2H), 2.41 (s, 3H), 2.39 (s, 3H).

**<sup>13</sup>C NMR** (126 MHz, CDCl<sub>3</sub>, 300 K): δ (ppm) = 187.8, 145.6, 145.4, 135.9, 133.4, 129.9, 129.6, 129.6, 128.7, 63.5, 21.9, 21.8.

**HRMS-ESI** (*m/z*) calc'd for C<sub>16</sub>H<sub>16</sub>NaO<sub>3</sub>S: [M+Na]<sup>+</sup>, 311.0718; Found, 311.0711.

**<sup>1</sup>H** and **<sup>13</sup>C NMR** of the product are in agreement with the literature.<sup>10a</sup>

**1-(4-methoxyphenyl)-2-tosylethan-1-one (19):**

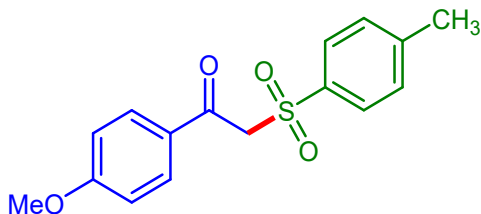

The titled compound was synthesized according to the general procedure **A** and was obtained as a yellow solid.

**Yield:** 93% (56.6 mg).

**R<sub>f</sub>** = 0.30 (Mobile phase: 20% EtOAc in Hexane).

**mp:** 128-129 °C.

**<sup>1</sup>H NMR** (500 MHz, CDCl<sub>3</sub>, 300 K):  $\delta$  (ppm) = 7.92 (dt, J = 9.0, 2.5 Hz, 2H), 7.74 (dt, J = 8.5, 2.0 Hz, 2H), 7.31 (d, J = 8.0 Hz, 2H), 6.92 (dt, J = 9.0, 3.0 Hz, 2H), 4.66 (s, 2H), 3.86 (s, 3H), 2.42 (s, 3H).

**<sup>13</sup>C NMR** (126 MHz, CDCl<sub>3</sub>, 300 K):  $\delta$  (ppm) = 186.4, 164.6, 145.4, 135.9, 132.0, 129.9, 129.0, 128.6, 114.1, 63.6, 55.7, 21.8.

**HRMS-ESI** (m/z) calc'd for C<sub>16</sub>H<sub>16</sub>NaO<sub>4</sub>S: [M+Na]<sup>+</sup>, 327.0667; Found, 327.0662.

**<sup>1</sup>H** and **<sup>13</sup>C NMR** of the product are in agreement with the literature.<sup>10b</sup>

**1-(3-methoxyphenyl)-2-tosylethan-1-one (20):**

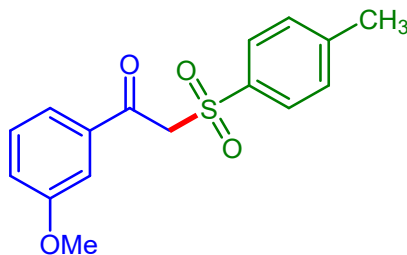

The titled compound was synthesized according to the general procedure **A** and was obtained as a yellow solid.

**Yield:** 89% (54.2 mg).

**R<sub>f</sub>** = 0.28 (Mobile phase: 20% EtOAc in Hexane).

**mp:** 97-98 °C.

**<sup>1</sup>H NMR** (500 MHz, CDCl<sub>3</sub>, 300 K):  $\delta$  (ppm) = 7.70 (d, J = 8.0 Hz, 2H), 7.43 (d, J = 7.0 Hz, 1H), 7.34 (s, 1H), 7.31-7.20 (m, 3H), 7.09-7.02 (m, 1H), 4.69 (s, 2H), 3.73 (s, 3H), 2.34 (s, 3H).

**<sup>13</sup>C NMR** (126 MHz, CDCl<sub>3</sub>, 300 K):  $\delta$  (ppm) = 188.2, 159.9, 145.4, 137.1, 136.0, 129.9, 128.6, 122.2, 121.0, 113.1, 63.6, 55.5, 21.7.

**HRMS-ESI** (m/z) calc'd for C<sub>16</sub>H<sub>16</sub>NaO<sub>4</sub>S: [M+Na]<sup>+</sup>, 327.0667; Found, 327.0664.

**1-(2,5-dimethoxyphenyl)-2-tosylethan-1-one (21):**

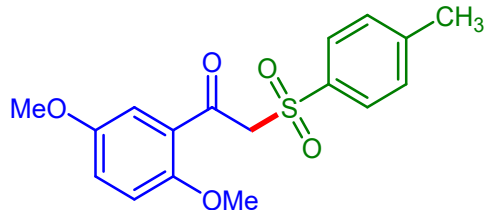

The titled compound was synthesized according to the general procedure **A** and was obtained as a yellow solid.

**Yield:** 86% (57.5 mg).

**R<sub>f</sub>** = 0.24 (Mobile phase: 20% EtOAc in Hexane).

**mp:** 94-95 °C.

**<sup>1</sup>H NMR** (500 MHz, CDCl<sub>3</sub>, 300 K): δ (ppm) = 7.71 (dt, J = 8.5, 2.0 Hz, 2H), 7.24 (d, J = 8.0 Hz, 2H), 7.13 (d, J = 3.5 Hz, 1H), 7.00 (dd, J = 7.0, 3.5 Hz, 1H), 6.78 (d, J = 9.0 Hz, 1H), 4.90 (s, 2H), 3.76 (s, 3H), 3.70 (s, 3H), 2.36 (s, 3H).

**<sup>13</sup>C NMR** (126 MHz, CDCl<sub>3</sub>, 300 K): δ (ppm) = 188.8, 153.6, 153.5, 144.9, 136.8, 129.6, 128.5, 126.1, 122.3, 114.0, 113.3, 67.4, 56.1, 55.8, 21.7.

**HRMS-ESI** (m/z) calc'd for C<sub>17</sub>H<sub>18</sub>NaO<sub>5</sub>S: [M+H]<sup>+</sup>, 357.0773; Found, 357.0767.

**1-([1,1'-biphenyl]-4-yl)-2-tosylethan-1-one (22):**

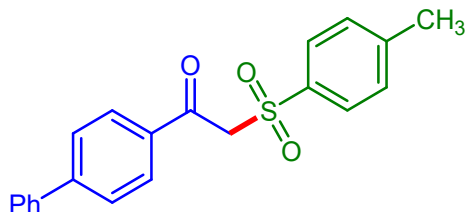

The titled compound was synthesized according to the general procedure **A** and was obtained as a white solid.

**Yield:** 78% (54.7 mg).

**R<sub>f</sub>** = 0.41 (Mobile phase: 20% EtOAc in Hexane).

**mp:** 121-122 °C.

**<sup>1</sup>H NMR** (500 MHz, CDCl<sub>3</sub>, 300 K): δ (ppm) = 8.03 (dt, J = 8.5, 2.0 Hz, 2H), 7.78 (dt, J = 8.5, 2.0 Hz, 2H), 7.70 (dt, J = 8.5, 2.0 Hz, 2H), 7.64-7.61 (m, 2H), 7.48 (t, J = 7.0 Hz, 2H), 7.42 (tt, J = 7.5, 1.5 Hz, 1H), 7.34 (d, J = 8.0 Hz, 2H), 4.75 (s, 2H), 2.44 (s, 3H).

**<sup>13</sup>C NMR** (126 MHz, CDCl<sub>3</sub>, 300 K): δ (ppm) = 187.8, 147.1, 145.5, 139.5, 135.8, 134.5, 130.1, 130.0, 129.1, 128.7, 128.7, 127.5, 127.4, 63.8, 21.8.

**HRMS-ESI** (m/z) calc'd for C<sub>21</sub>H<sub>18</sub>NaO<sub>3</sub>S: [M+Na]<sup>+</sup>, 373.0874; Found, 373.0866.

**<sup>1</sup>H** and **<sup>13</sup>C NMR** of the product are in agreement with the literature.<sup>10d</sup>

**1-(4-bromophenyl)-2-tosylethan-1-one (23):**

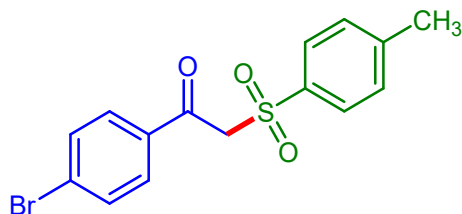

The titled compound was synthesized according to the general procedure **A** and was obtained as a white solid.

**Yield:** 79% (55.8 mg).

**R<sub>f</sub>:** 0.51 (Mobile phase: 20% EtOAc in Hexane).

**mp:** 168-169 °C.

**<sup>1</sup>H NMR** (500 MHz, CDCl<sub>3</sub>, 300 K): δ (ppm) = 7.54 (d, J = 8.0 Hz, 2H), 7.42 (d, J = 8.5 Hz, 2H), 7.28 (d, J = 8.0 Hz, 2H), 6.98 (d, J = 8.5 Hz, 2H), 4.25 (s, 2H), 2.45 (s, 3H)

**<sup>13</sup>C NMR** (126 MHz, CDCl<sub>3</sub>, 300 K): δ (ppm) = 145.0, 134.8, 132.4, 131.8, 129.7, 128.6, 127.4, 123.2, 115.0, 62.1, 21.7.

**HRMS-ESI** (m/z) calc'd for C<sub>15</sub>H<sub>13</sub>BrNaO<sub>3</sub>S: [M+Na]<sup>+</sup>, 376.9646; Found, 376.9641.

**<sup>1</sup>H** and **<sup>13</sup>C NMR** of the product are in agreement with the literature.<sup>10a</sup>

**1-(naphthalen-2-yl)-2-tosylethan-1-one (24):**

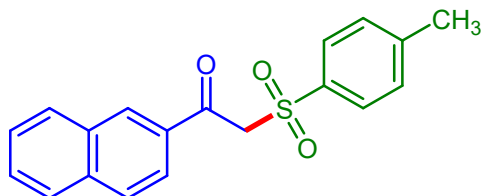

The titled compound was synthesized according to the general procedure **A** and was obtained as a white solid.

**Yield:** 65% (42.2 mg).

**R<sub>f</sub>:** 0.41 (Mobile phase: 20% EtOAc in Hexane).

**mp:** 151-152 °C.

**<sup>1</sup>H NMR** (500 MHz, CDCl<sub>3</sub>, 300 K): δ (ppm) = 8.44 (s, 1H), 7.97-7.92 (m, 2H), 7.86 (dd, J = 8.5, 4.0 Hz, 2H), 7.77 (dt, J = 8.5, 2.0 Hz, 2H), 7.63 (td, J = 7.0, 1.5 Hz, 1H), 7.56 (td, J = 7.0, 1.5 Hz, 1H), 7.30 (d, J = 8.0 Hz, 2H), 4.85 (s, 2H), 2.39 (s, 3H).

**<sup>13</sup>C NMR** (126 MHz, CDCl<sub>3</sub>, 300 K): δ (ppm) = 188.1, 145.5, 136.1, 135.8, 133.2, 132.4, 132.3, 130.1, 129.9, 129.5, 128.9, 128.7, 127.9, 127.2, 124.0, 63.8, 21.8.

**HRMS-ESI** (m/z) calc'd for C<sub>19</sub>H<sub>16</sub>NaO<sub>3</sub>S: [M+Na]<sup>+</sup>, 347.0718; Found, 347.0713.

**<sup>1</sup>H** and **<sup>13</sup>C NMR** of the product are in agreement with the literature.<sup>10b</sup>

**2-tosyl-1-(4-(trifluoromethyl)phenyl)ethan-1-one (25):**

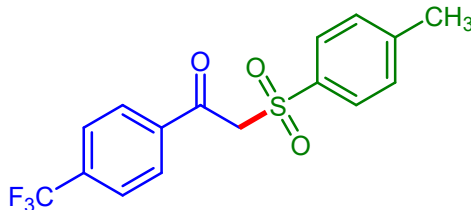

The titled compound was synthesized according to the general procedure **A** and was obtained as a white solid.

**Yield:** 69% (47.3 mg).

**R<sub>f</sub>:** 0.39 (Mobile phase: 20% EtOAc in Hexane).

**mp:** 135-136 °C.

**<sup>1</sup>H NMR** (500 MHz, CDCl<sub>3</sub>, 300 K): δ (ppm) = 8.04 (d, J = 9.0 Hz, 2H), 7.71 (t, J = 8.5 Hz, 4H), 7.31 (d, J = 8.0 Hz, 2H), 4.75 (s, 2H), 2.41 (s, 3H).

**<sup>13</sup>C NMR** (126 MHz, CDCl<sub>3</sub>, 300 K): δ (ppm) = 187.6, 145.8, 138.4, 135.3 (q, J = 32.5 Hz), 130.0, 129.8, 128.6, 128.5, 125.9 (q, J = 4.0 Hz), 123.5 (q, J = 273.9 Hz), 63.9, 21.7.

**<sup>19</sup>F NMR** (472 MHz, CDCl<sub>3</sub>, 300K): δ (ppm) = -63.2.

**HRMS-ESI** (m/z) calc'd for C<sub>16</sub>H<sub>13</sub>F<sub>3</sub>NaO<sub>3</sub>S: [M+Na]<sup>+</sup>, 365.0435; Found, 365.0428.

**<sup>1</sup>H** and **<sup>13</sup>C NMR** of the product are in agreement with the literature.<sup>10a</sup>

**1-(4-nitrophenyl)-2-tosylethan-1-one (26):**

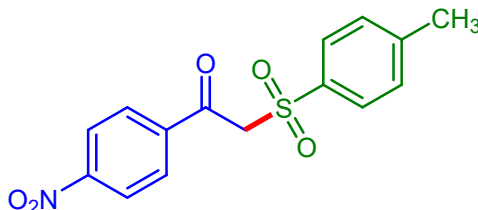

The titled compound was synthesized according to the general procedure **A** and was obtained as a yellow solid.

**Yield:** 77% (49.2 mg).

**R<sub>f</sub>:** 0.28 (Mobile phase: 20% EtOAc in Hexane).

**mp:** 142-143 °C.

**<sup>1</sup>H NMR** (500 MHz, CDCl<sub>3</sub>, 300 K): δ (ppm) = 8.32 (dt, J = 9.0, 2.5 Hz, 2H), 8.14 (dt, J = 9.0, 2.0 Hz, 2H), 7.74 (d, J = 8.0 Hz, 2H), 7.36 (d, J = 8.0 Hz, 2H), 4.76 (s, 2H), 2.46 (s, 3H).

**<sup>13</sup>C NMR** (126 MHz, CDCl<sub>3</sub>, 300 K): δ (ppm) = 187.1, 150.9, 146.0, 140.0, 135.4, 130.6, 130.1, 128.6, 124.1, 64.2, 21.8.

**HRMS-ESI** (m/z) calc'd for C<sub>15</sub>H<sub>13</sub>NNaO<sub>5</sub>S: [M+Na]<sup>+</sup>, 342.0412; Found, 342.0415.

**<sup>1</sup>H** and **<sup>13</sup>C NMR** of the product are in agreement with the literature.<sup>10b</sup>

**1-(pyridin-2-yl)-2-tosylethan-1-one (27):**

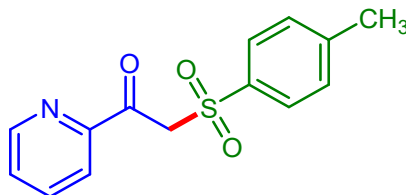

The titled compound was synthesized according to the general procedure **A** and was obtained as a brown solid.

**Yield:** 71% (39.1 mg).

**R<sub>f</sub>:** 0.27 (Mobile phase: 20% EtOAc in Hexane).

**mp:** 89-90 °C.

**<sup>1</sup>H NMR** (500 MHz, CDCl<sub>3</sub>, 300 K): δ (ppm) = 8.54-8.50 (m, 1H), 7.93 (d, J = 8.0 Hz, 1H), 7.79-7.71 (m 3H), 7.45-7.40 (m, 1H), 7.24 (d, J = 8.0 Hz, 2H), 5.09 (s, 2H), 2.35 (s, 3H).

**<sup>13</sup>C NMR** (126 MHz, CDCl<sub>3</sub>, 300 K): δ (ppm) = 188.9, 151.9, 149.2, 145.1, 137.3, 136.7, 129.7, 128.6, 128.1, 122.6, 61.1, 21.7.

**HRMS-ESI** (m/z) calc'd for C<sub>14</sub>H<sub>13</sub>NNaO<sub>3</sub>S: [M+Na]<sup>+</sup>, 298.0514; Found, 298.0508.

**1-cyclopropyl-2-tosylethan-1-one (28):**

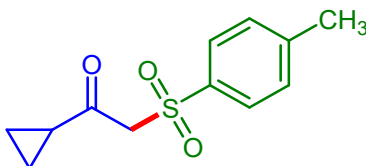

The titled compound was synthesized according to the general procedure **A** and was obtained as a white solid.

**Yield:** 84% (40.1mg).

**R<sub>f</sub>:** 0.37 (Mobile phase: 20% EtOAc in Hexane).

**mp:** 74-75 °C.

**<sup>1</sup>H NMR** (500 MHz, CDCl<sub>3</sub>, 300 K): δ (ppm) = 7.68 (d, J = 8.0 Hz, 2H), 7.25 (d, J = 8.0 Hz, 2H), 4.22 (s, 2H), 2.33 (s, 3H), 2.15-2.09 (m, 1H), 0.99-0.87 (m, 4H).

**<sup>13</sup>C NMR** (126 MHz, CDCl<sub>3</sub>, 300 K): δ (ppm) = 198.7, 145.4, 135.9, 130.0, 128.3, 68.1, 22.1, 21.7, 13.3.

**HRMS-ESI** (m/z) calc'd for C<sub>12</sub>H<sub>14</sub>NaO<sub>3</sub>S: [M+Na]<sup>+</sup>, 261.0561; Found, 261.0555.



**tert-butyl 4-(2-tosylacetyl)piperidine-1-carboxylate (29):**

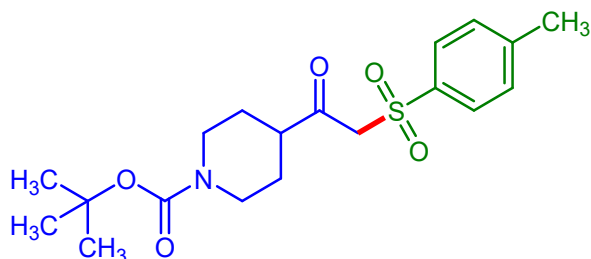

The titled compound was synthesized according to the general procedure **A** and was obtained as a yellow oil.

**Yield:** 39% (29.8 mg).

**R<sub>f</sub>:** 0.38 (Mobile phase: 20% EtOAc in Hexane).

**<sup>1</sup>H NMR** (500 MHz, CDCl<sub>3</sub>, 300 K): δ (ppm) = 7.71 (d, J = 8.0 Hz, 2H) 7.33(d, J = 8.0 Hz, 2H), 4.19 (s, 2H), 4.05 (m, 2H), 2.88-2.68 (m, 3H), 2.41 (s, 3H), 1.80 (m, 2H), 1.40 (s, 9H), 1.21 (s, 1H).

**<sup>13</sup>C NMR** (126 MHz, CDCl<sub>3</sub>, 300 K): δ (ppm) = 200.0, 154.6, 145.6, 135.9, 130.1, 128.4, 79.8, 65.0, 49.3, 29.7, 28.4, 27.0, 21.8.

**HRMS-ESI** (m/z) calc'd for C<sub>19</sub>H<sub>31</sub>N<sub>2</sub>O<sub>5</sub>S: [M+NH<sub>4</sub>]<sup>+</sup>, 399.01954; Found, 399.1957.

**1-(adamantan-1-yl)-2-tosylethan-1-one (30):**

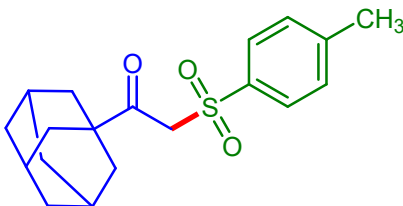

The titled compound was synthesized according to the general procedure **A** and was obtained as a white solid.

**Yield:** 66% (43.9 mg).

**R<sub>f</sub>:** 0.51 (Mobile phase: 20% EtOAc in Hexane).

**mp:** 146-147 °C.

**<sup>1</sup>H NMR** (500 MHz, CDCl<sub>3</sub>, 300 K): δ (ppm) = 7.89 (dt, J = 8.5, 2.0 Hz, 2H), 7.33 (d, J = 8.0 Hz, 2H), 4.27 (s, 2H), 2.42 (s, 3H), 2.02 (s, 3H), 1.74-1.68 (m, 9H) 1.62(m, 3H), 1.23 (s, 2H).

**<sup>13</sup>C NMR** (126 MHz, CDCl<sub>3</sub>, 300 K): δ (ppm) = 203.1, 145.1, 136.7, 129.8, 128.7, 60.4, 47.6, 37.4, 36.3, 29.8, 27.6, 21.8.

**HRMS-ESI** (m/z) calc'd for C<sub>19</sub>H<sub>24</sub>NaO<sub>3</sub>S: [M+Na]<sup>+</sup>, 355.1344; Found, 355.1336.

**3,3-dimethyl-1-tosylbutan-2-one (31):**

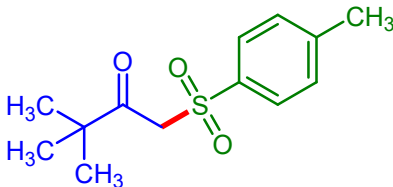

The titled compound was synthesized according to the general procedure **A** and was obtained as a white solid.

**Yield:** 39% (19.8 mg).

**R<sub>f</sub>:** 0.43 (Mobile phase: 20% EtOAc in Hexane).

**mp:** 114-115 °C.

**<sup>1</sup>H NMR** (500 MHz, CDCl<sub>3</sub>, 300 K): δ (ppm) = 7.77 (dt, *J* = 8.5, 1.5 Hz, 2 H), 7.31 (d, *J* = 8.0 Hz, 2 H), 4.30 (s, 2 H), 2.40 (s, 3 H), 1.06 (s, 9 H).

**<sup>13</sup>C NMR** (126 MHz, CDCl<sub>3</sub>, 300 K): δ (ppm) = 203.6, 145.1, 136.6, 129.8, 128.7, 60.9, 45.3, 25.6, 21.7.

**HRMS-ESI** (*m/z*) calc'd for C<sub>13</sub>H<sub>18</sub>NaO<sub>3</sub>S: [M+Na]<sup>+</sup>, 277.0874; Found, 277.0868.

**ethyl 2-oxo-3-tosylpropanoate (32):**

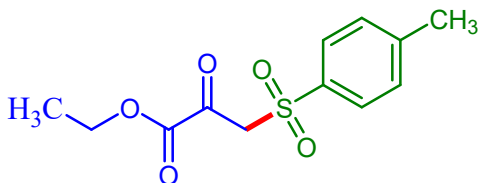

The titled compound was synthesized according to the general procedure **A** and was obtained as a colorless liquid.

**Yield:** 26% (15.7 mg).

**R<sub>f</sub>:** 0.28 (Mobile phase: 20% EtOAc in Hexane).

**<sup>1</sup>H NMR** (500 MHz, CDCl<sub>3</sub>, 300 K): δ (ppm) = 7.92 (dt, *J* = 8.0, 2.0 Hz, 2H), 7.32 (dt, *J* = 8.0 Hz, 2H), 4.62 (s, 2H), 4.37 (q, *J* = 7.0 Hz, 2H), 2.43 (s, 3H), 1.36 (t, *J* = 7.5 Hz, 3H).

**<sup>13</sup>C NMR** (126 MHz, CDCl<sub>3</sub>, 300 K): δ (ppm) = 171.2, 158.2, 144.5, 138.7, 129.5, 128.1, 64.0, 63.3, 21.7, 14.0.

**HRMS-ESI** (*m/z*) calc'd for C<sub>12</sub>H<sub>14</sub>NaO<sub>5</sub>S: [M+Na]<sup>+</sup>, 293.0460; Found, 293.0453.

**(S)-2-tosyl-2,3-dihydro-1H-inden-1-one (33):**

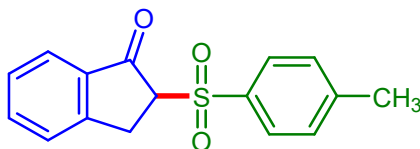

The titled compound was synthesized according to the general procedure **A** and was obtained as a white solid.

**Yield:** 62% (35.5 mg).

**R<sub>f</sub>:** 0.27 (Mobile phase: 20% EtOAc in Hexane).

**mp:** 147-148 °C.

**<sup>1</sup>H NMR** (500 MHz, CDCl<sub>3</sub>, 300 K): δ (ppm) = 7.79 (d, *J* = 10.5 Hz, 2H), 7.71 (d, *J* = 10.0 Hz, 1H), 7.62 (t, *J* = 10.0 Hz, 1H), 7.49 (d, *J* = 9.5 Hz, 1H), 7.37 (dd, *J* = 12.4, 7.8 Hz, 3H), 4.26 (dd, *J* = 10.8, 4.0 Hz, 1H), 3.80 (dd, *J* = 18.5, 8.5 Hz, 1H), 3.52 (dd, *J* = 18.5, 8.5 Hz, 1H), 2.44 (s, 3 H).

**<sup>13</sup>C NMR** (126 MHz, CDCl<sub>3</sub>, 300 K): δ (ppm) = 193.9, 145.3, 141.6, 137.9, 135.3, 130.2, 129.0, 128.7, 127.8, 124.6, 124.6, 72.8, 31.8, 21.8.

**HRMS-ESI** (*m/z*) calc'd for C<sub>16</sub>H<sub>14</sub>NaO<sub>3</sub>S: [M+Na]<sup>+</sup>, 309.0561; Found, 309.0553.

**(S)-2-tosyl-3,4-dihydronaphthalen-1(2H)-one (34):**

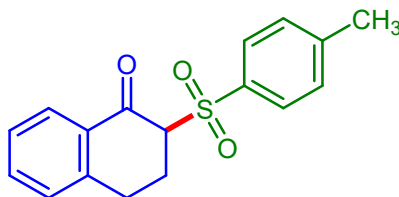

The titled compound was synthesized according to the general procedure **A** and was obtained as a colorless liquid.

**Yield:** 40% (24.0 mg).

**R<sub>f</sub>:** 0.29 (Mobile phase: 20% EtOAc in Hexane).

**<sup>1</sup>H NMR** (500 MHz, CDCl<sub>3</sub>, 300 K): δ (ppm) = 7.99 (d, *J* = 8.5 Hz, 1H), 7.79 (d, *J* = 8.0 Hz, 2H), 7.52 (t, *J* = 8.0 Hz, 1H), 7.41-7.24 (m, 4H), 4.09 (t, *J* = 7.0 Hz, 1H), 3.59-3.45 (m, 1H), 2.99 (dt, *J* = 16.9, 7.5 Hz, 1H), 2.93-2.81 (m, 1H), 2.72-2.61 (m, 1H), 2.46 (s, 3H).

**<sup>13</sup>C NMR** (126 MHz, CDCl<sub>3</sub>, 300 K): δ (ppm) = 189.0, 145.3, 141.6, 137.9, 135.3, 130.2, 129.0, 128.7, 127.8, 124.6, 124.6, 69.8, 31.8, 21.8.

**HRMS-ESI** (*m/z*) calc'd for C<sub>17</sub>H<sub>16</sub>NaO<sub>3</sub>S: [M+Na]<sup>+</sup>, 323.0718; Found, 323.0720.

**2,2-difluoro-1-phenyl-2-tosylethan-1-one (35):**

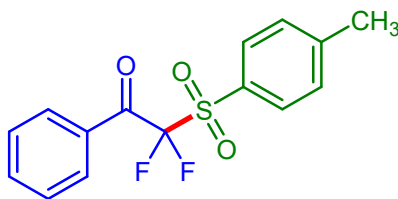

The titled compound was synthesized according to the general procedure **A** and was obtained as a white solid.

**Yield:** 80% (49.6 mg).

**R<sub>f</sub>:** 0.56 (Mobile phase: 10% EtOAc in Hexane).

**mp:** 101-102 °C.

**<sup>1</sup>H NMR** (500 MHz, CDCl<sub>3</sub>, 300 K): δ (ppm) = 8.20-8.16 (m, 2H), 7.89 (d, *J* = 8.5 Hz, 2H), 7.69 (tt, *J* = 7.5, 1.0 Hz, 1H), 7.533 (t, *J* = 7.5 Hz, 2H), 7.43 (d, *J* = 8.0 Hz, 2H), 2.49 (s, 3 H).

**<sup>13</sup>C NMR** (126 MHz, CDCl<sub>3</sub>, 300 K): δ (ppm) = 184.1 (t, *J* = 23.2 Hz), 147.9, 135.5, 132.1, 131.0, 130.9 (t, *J* = 3.5 Hz), 130.4, 129.4, 128.9, 116.6 (t, *J* = 298.8 Hz), 22.0.

**<sup>19</sup>F NMR** (471 MHz, CDCl<sub>3</sub>, 300K): δ (ppm) = -101.6

**HRMS-ESI** (m/z) calc'd for C<sub>15</sub>H<sub>12</sub>F<sub>2</sub>NaO<sub>3</sub>S: [M+Na]<sup>+</sup>, 333.0373; Found, 333.0369.

**ethyl 2-methyl-2-(4-(2-tosylacetyl)phenoxy)propanoate (36):**

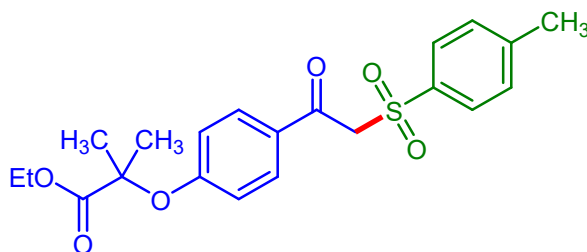

The titled compound was synthesized according to the general procedure **A** and was obtained as a colorless oil.

**Yield:** 63% (51.1 mg).

**R<sub>f</sub>** = 0.33 (Mobile phase: 20% EtOAc in Hexane).

**<sup>1</sup>H NMR** (500 MHz, CDCl<sub>3</sub>, 300 K): δ (ppm) = 7.84 (dt, *J* = 9.0, 2.5 Hz, 2H), 7.72 (dt, *J* = 8.5, 2.0 Hz, 2H), 7.28 (d, *J* = 8.0 Hz, 2H), 6.78 (dt, *J* = 9.0, 3.0 Hz, 2H), 4.63 (s, 3H), 4.19 (q, *J* = 7.0 Hz, 2H), 2.39 (s, 3H), 1.63 (s, 6H), 1.18 (t, *J* = 7.5 Hz, 3H).

**<sup>13</sup>C NMR** (126 MHz, CDCl<sub>3</sub>, 300 K): δ (ppm) = 186.5, 173.4, 160.9, 145.3, 136.0, 131.5, 129.9, 129.4, 128.6, 117.4, 79.6, 63.5, 61.8, 25.4, 21.7, 14.1.

**HRMS-ESI** (m/z) calc'd for C<sub>21</sub>H<sub>24</sub>NaO<sub>6</sub>S: [M+Na]<sup>+</sup>, 427.1191; Found, 427.1185.

**4-(2-tosylacetyl)phenyl 2-(4-isobutylphenyl)propanoate (37):**

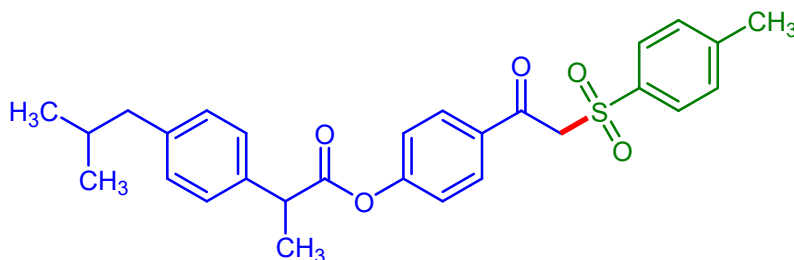

The titled compound was synthesized according to the general procedure **A** and was obtained as a white solid.

**Yield:** 48% (46.0 mg).

**R<sub>f</sub>:** 0.39 (Mobile phase: 20% EtOAc in Hexane).

**mp:** 222-223 °C.

**<sup>1</sup>H NMR** (500 MHz, CDCl<sub>3</sub>, 300 K): δ (ppm) = 7.93 (dt, J = 9.0, 3.0 Hz, 2H), 7.73 (dt, J = 8.5, 2.0 Hz, 2H), 7.33-7.27 (m, 4H), 7.16 (dt, J = 8.0, 2.0 Hz, 2H), 7.11 (dt, J = 9.0, 2.5 Hz, 2H), 4.67 (s, 2H), 3.95 (q, J = 7.0 Hz, 1H), 2.48 (d, J = 7.0 Hz, 2H), 2.42 (s, 3H), 1.87 (septate, J = 6.5 Hz, 1H), 1.61 (d, J = 7.0 Hz, 3H), 0.92 (d, J = 6.5 Hz, 6H);

**<sup>13</sup>C NMR** (126 MHz, CDCl<sub>3</sub>, 300 K): δ (ppm) = 187.0, 172.5, 155.7, 145.6, 141.2, 136.8, 135.7, 133.2, 131.1, 130.0, 129.7, 128.7, 127.3, 122.0, 63.7, 45.4, 45.1, 30.3, 22.5, 21.8, 18.5.

**HRMS-ESI** (m/z) calc'd for C<sub>28</sub>H<sub>30</sub>NaO<sub>5</sub>S: [M+Na]<sup>+</sup>, 501.1712; Found, 501.1709.

**1-phenyl-2-(phenylsulfonyl)ethan-1-one (38):**

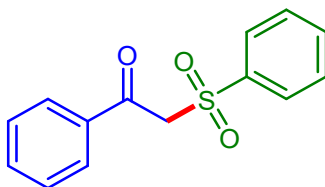

The titled compound was synthesized according to the general procedure **B** and was obtained as a white solid.

**Yield:** 90% (46.9 mg).

**R<sub>f</sub>** = 0.32 (Mobile phase: 20% EtOAc in Hexane).

**mp:** 95-96 °C.

**<sup>1</sup>H NMR** (500 MHz, CDCl<sub>3</sub>, 300 K): δ (ppm) = 7.88 (t, J = 8.8 Hz, 4H), 7.64-7.54 (m, 2H), 7.50 (t, J = 8.0 Hz, 2H), 7.43 (t, J = 8.0 Hz, 2H), 4.73 (s, 2H).

**<sup>13</sup>C NMR** (126 MHz, CDCl<sub>3</sub>, 300 K): δ (ppm) = 188.1, 138.9, 135.8, 134.4, 134.2, 129.3, 129.2, 128.9, 128.5, 63.4.

**HRMS-ESI** (m/z) calc'd for C<sub>14</sub>H<sub>12</sub>NaO<sub>3</sub>S: [M+Na]<sup>+</sup>, 283.0405; Found, 283.0400.

**<sup>1</sup>H** and **<sup>13</sup>C NMR** of the product are in agreement with the literature.<sup>10a</sup>

**2-((4-fluorophenyl)sulfonyl)-1-phenylethan-1-one (39):**

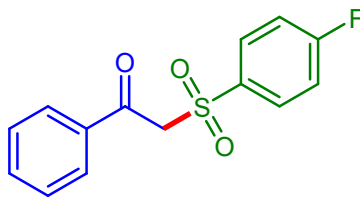

The titled compound was synthesized according to the general procedure **B** and was obtained as a yellow liquid.

**Yield:** 83% (46.2 mg).

**R<sub>f</sub>:** 0.41 (Mobile phase: 20% EtOAc in Hexane).

**<sup>1</sup>H NMR** (500 MHz, CDCl<sub>3</sub>, 300 K): δ (ppm) = 7.96-7.89 (m, 4H), 7.63 (tt, J = 7.5, 1.0 Hz, 1H), 7.49 (tt, J = 8.5, 1.5 Hz, 2H), 7.21 (t, J = 8.5 Hz, 2H), 4.74 (s, 2H).

**<sup>13</sup>C NMR** (126 MHz, CDCl<sub>3</sub>, 300 K): δ (ppm) = 188.1, 166.2 (d, J = 257.9 Hz), 135.7, 134.7, 134.6, 131.8 (d, J = 10.2 Hz), 129.3, 129.0, 116.6 (d, J = 22.9), 63.5.

**<sup>19</sup>F NMR** (471 MHz, CDCl<sub>3</sub>, 300K): δ (ppm) = -102.2

**HRMS-ESI** (m/z) calc'd for C<sub>14</sub>H<sub>11</sub>FNao<sub>3</sub>S: [M+Na]<sup>+</sup>, 301.0311; Found, 301.0304.

**<sup>1</sup>H** and **<sup>13</sup>C NMR** of the product are in agreement with the literature.<sup>10a</sup>

**2-((3-fluorophenyl)sulfonyl)-1-phenylethan-1-one (40):**

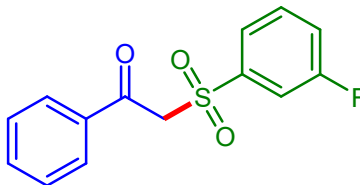

The titled compound was synthesized according to the general procedure **B** and was obtained as a white solid.

**Yield:** 69% (38.4 mg).

**R<sub>f</sub>:** 0.44 (Mobile phase: 20% EtOAc in Hexane).

**mp:** 98-99 °C.

**<sup>1</sup>H NMR** (500 MHz, CDCl<sub>3</sub>, 300 K): δ (ppm) = 7.92 (d, J = 7.5 Hz, 2H), 7.70 (d, J = 8.0 Hz, 1H), 7.66-7.58 (m, 2H), 7.56-7.51 (m, 1H), 7.48 (t, J = 8.0 Hz, 2H), 7.39-7.32 (m, 1H), 4.76 (s, 2H).

**<sup>13</sup>C NMR** (126 MHz, CDCl<sub>3</sub>, 300 K): δ (ppm) = 187.9, 162.4 (d, J = 253.0 Hz), 140.7 (d, J = 7.2 Hz), 135.6, 134.7, 131.2 (d, J = 7.9 Hz), 129.3, 129.1, 124.6 (d, J = 3.8 Hz), 121.7 (d, J = 21.3 Hz), 116.1 (d, J = 24.7), 63.2.

**<sup>19</sup>F NMR** (471 MHz, CDCl<sub>3</sub>, 300K): δ (ppm) = -108.8

**HRMS-ESI** (m/z) calc'd for C<sub>14</sub>H<sub>11</sub>FNao<sub>3</sub>S: [M+Na]<sup>+</sup>, 301.0311; Found, 301.0305.

**<sup>1</sup>H** and **<sup>13</sup>C NMR** of the product are in agreement with the literature.<sup>10f</sup>

**2-((2-fluorophenyl)sulfonyl)-1-phenylethan-1-one (41):**

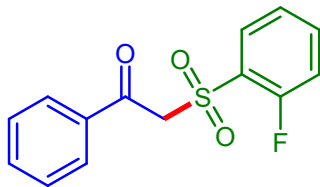

The titled compound was synthesized according to the general procedure **B** and was obtained as a white solid.

**Yield:** 91% (50.6 mg).

**R<sub>f</sub>:** 0.42 (Mobile phase: 20% EtOAc in Hexane).

**mp:** 98-99 °C.

**<sup>1</sup>H NMR** (500 MHz, CDCl<sub>3</sub>, 300 K): δ (ppm) = 7.97-7.93 (m, 2H), 7.90-7.86 (m, 1H), 7.70-7.65 (m, 1H), 7.63 (tt, J = 7.0, 1.5 Hz, 1H), 7.49 (t, J = 8.0 Hz, 2H), 7.32 (td, J = 7.5, 1.0 Hz, 1H), 7.29-7.24 (m, 1H), 4.93 (s, 2H).

**<sup>13</sup>C NMR** (126 MHz, CDCl<sub>3</sub>, 300 K): δ (ppm) = 187.8, 159.7 (d, J = 256.3 Hz), 136.8 (d, J = 8.7 Hz), 135.7, 134.6, 130.9, 129.3, 129.0, 126.8 (d, J = 14.4 Hz), 124.9 (d, J = 4.0 Hz), 117.2 (d, J = 21.2), 62.3 (d, J = 3.2 Hz).

**<sup>19</sup>F NMR** (471 MHz, CDCl<sub>3</sub>, 300K): δ (ppm) = -108.8

**HRMS-ESI** (m/z) calc'd for C<sub>14</sub>H<sub>11</sub>FO<sub>3</sub>S: [M+Na]<sup>+</sup>, 301.0311; Found, 301.0304.

**<sup>1</sup>H** and **<sup>13</sup>C NMR** of the product are in agreement with the literature.<sup>10f</sup>

**2-((4-chlorophenyl)sulfonyl)-1-phenylethan-1-one (42):**

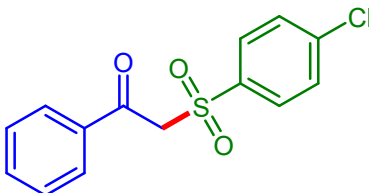

The titled compound was synthesized according to the general procedure **B** and was obtained as a white solid.

**Yield:** 58% (34.2 mg).

**R<sub>f</sub>:** 0.45 (Mobile phase: 20% EtOAc in Hexane).

**mp:** 126-127 °C.

**<sup>1</sup>H NMR** (500 MHz, CDCl<sub>3</sub>, 300 K): δ (ppm) = 7.92 (dd, J = 8.3, 1.0 Hz, 2H), 7.83 (dt, J = 8.5, 2.5 Hz, 2H), 7.63 (t, J = 7.5 Hz, 1H), 7.53-7.45 (m, 4H), 4.75 (s, 2H).

**<sup>13</sup>C NMR** (126 MHz, CDCl<sub>3</sub>, 300 K): δ (ppm) = 188.1, 141.2, 137.2, 135.6, 134.6, 130.3, 129.6, 129.3, 129.0, 63.3.

**HRMS-ESI** (m/z) calc'd for C<sub>14</sub>H<sub>11</sub>ClNaO<sub>3</sub>S: [M+Na]<sup>+</sup>, 317.0015; Found, 317.0014.

**<sup>1</sup>H** and **<sup>13</sup>C NMR** of the product are in agreement with the literature.<sup>10a</sup>

**2-((3-chlorophenyl)sulfonyl)-1-phenylethan-1-one (43):**

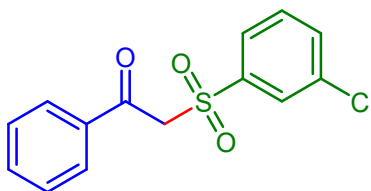

The titled compound was synthesized according to the general procedure **B** and was obtained as a white solid.

**Yield:** 72% (42.4 mg).

**R<sub>f</sub>:** 0.43 (Mobile phase: 20% EtOAc in Hexane).

**mp:** 101-102 °C.

**<sup>1</sup>H NMR** (500 MHz, CDCl<sub>3</sub>, 300 K): δ (ppm) = 7.93-7.89 (m, 2H), 7.88 (t, J = 2.0 Hz, 1H), 7.78 (d, J = 7.5 Hz, 1H), 7.65-7.58 (m, 2H), 7.51-7.44 (m, 3H), 4.77 (s, 2H).

**<sup>13</sup>C NMR** (126 MHz, CDCl<sub>3</sub>, 300 K): δ (ppm) = 187.9, 140.4, 135.6, 135.5, 134.7, 134.5, 130.6, 129.3, 129.0, 128.7, 126.9, 63.2.

**HRMS-ESI** (m/z) calc'd for C<sub>14</sub>H<sub>11</sub>ClNaO<sub>3</sub>S: [M+Na]<sup>+</sup>, 317.0015; Found, 317.0007.

**<sup>1</sup>H** and **<sup>13</sup>C NMR** of the product are in agreement with the literature.<sup>10e</sup>

**2-((4-(tert-butyl)phenyl)sulfonyl)-1-phenylethan-1-one (44):**

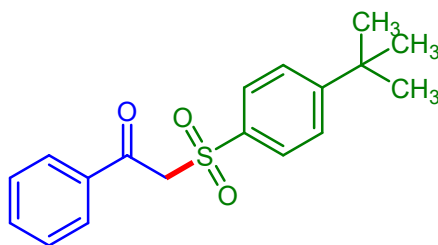

The titled compound was synthesized according to the general procedure **B** and was obtained as a white solid.

**Yield:** 49% (31.0 mg).

**R<sub>f</sub>:** 0.33 (Mobile phase: 20% EtOAc in Hexane).

**mp:** 125-126 °C.

**<sup>1</sup>H NMR** (500 MHz, CDCl<sub>3</sub>, 300 K): δ (ppm) = 7.94-7.89 (m, 2 H), 7.81 (dt, J = 9.0, 2.0 Hz, 2H), 7.60 (tt, J = 7.5, 1.5 Hz, 1H), 7.53 (dt, J = 9.0, 2.0 Hz, 2H), 7.46 (t, J = 6.5 Hz, 2H), 4.73 (s, 2H), 1.33 (s, 9H).

**<sup>13</sup>C NMR** (126 MHz, CDCl<sub>3</sub>, 300 K): δ (ppm) = 188.2, 158.3, 135.9, 135.9, 134.4, 129.4, 128.9, 128.5, 126.3, 63.6, 35.4, 31.1.

**HRMS-ESI** (m/z) calc'd for C<sub>18</sub>H<sub>20</sub>NaO<sub>3</sub>S: [M+Na]<sup>+</sup>, 339.1031; Found, 339.1023.

**<sup>1</sup>H** and **<sup>13</sup>C NMR** of the product are in agreement with the literature.<sup>10c</sup>



**2-(naphthalen-2-ylsulfonyl)-1-phenylethan-1-one (45):**

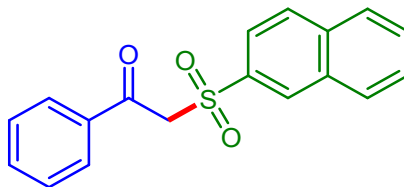

The titled compound was synthesized according to the general procedure **B** and was obtained as a white solid.

**Yield:** 92% (57.1 mg).

**R<sub>f</sub>:** 0.36 (Mobile phase: 20% EtOAc in Hexane).

**mp:** 132-133 °C.

**<sup>1</sup>H NMR** (500 MHz, CDCl<sub>3</sub>, 300 K): δ (ppm) = 8.46 (s, 1H), 8.01-7.91 (m, 5H), 7.87 (dd, *J* = 9.0, 2.0 Hz, 1H), 7.68 (dt, *J* = 7.5, 1.0 Hz, 1H), 7.65-7.57 (m, 2H), 7.45 (t, *J* = 8.0 Hz, 2H), 4.82 (s, 2H).

**<sup>13</sup>C NMR** (126 MHz, CDCl<sub>3</sub>, 300 K): δ (ppm) = 188.1, 135.8, 135.7, 135.6, 134.5, 132.1, 130.8, 129.7, 129.6, 129.6, 129.4, 128.9, 128.1, 127.8, 123.0, 63.6.

**HRMS-ESI** (*m/z*) calc'd for C<sub>18</sub>H<sub>14</sub>NaO<sub>3</sub>S: [M+Na]<sup>+</sup>, 333.0561; Found, 333.0561.

**<sup>1</sup>H** and **<sup>13</sup>C NMR** of the product are in agreement with the literature.<sup>10a</sup>

**2-([1,1'-biphenyl]-4-ylsulfonyl)-1-phenylethan-1-one (46):**

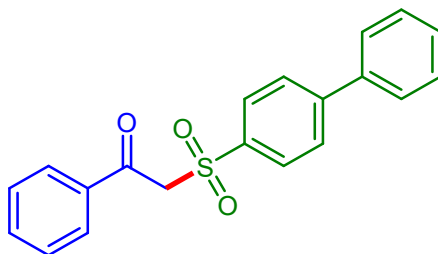

The titled compound was synthesized according to the general procedure **B** and was obtained as a white solid.

**Yield:** 79% (53.2 mg).

**R<sub>f</sub>:** 0.39 (Mobile phase: 20% EtOAc in Hexane).

**mp:** 142-142 °C.

**<sup>1</sup>H NMR** (500 MHz, CDCl<sub>3</sub>, 300 K): δ (ppm) = 7.98-7.93 (m, 4H), 7.74 (dt, *J* = 8.5, 2.0 Hz, 2H), 7.62 (t, *J* = 6.5 Hz, 3H), 7.49 (t, *J* = 7.5 Hz, 5H), 4.78 (s, 2H).

**<sup>13</sup>C NMR** (126 MHz, CDCl<sub>3</sub>, 300 K): δ (ppm) = 188.2, 147.3, 139.1, 137.3, 135.8, 134.5, 129.4, 129.2, 129.2, 129.0, 128.8, 127.9, 127.5, 63.6.

**HRMS-ESI** (*m/z*) calc'd for C<sub>20</sub>H<sub>16</sub>NaO<sub>3</sub>S: [M+Na]<sup>+</sup>, 359.0718; Found, 359.0716.

**1-phenyl-2-(thiophen-2-ylsulfonyl)ethan-1-one (47):**

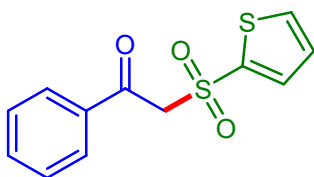

The titled compound was synthesized according to the general procedure **B** and was obtained as a white solid.

**Yield:** 66% (35.2 mg).

**R<sub>f</sub>:** 0.36 (Mobile phase: 20% EtOAc in Hexane).

**mp:** 132-133 °C.

**<sup>1</sup>H NMR** (500 MHz, CDCl<sub>3</sub>, 300 K): δ (ppm) = 7.95-7.91 (m, 2H), 7.75-7.67 (m, 2H), 7.62 (tt, *J* = 7.5, 1.5 Hz, 1H), 7.48 (tt, *J* = 8.0, 1.5 Hz, 2H), 7.16-7.10 (m, 1H), 4.83 (s, 2H).

**<sup>13</sup>C NMR** (126 MHz, CDCl<sub>3</sub>, 300 K): δ (ppm) = 188.1, 139.5, 135.6, 135.5, 135.3, 134.5, 129.2, 129.0, 128.1, 64.2.

**HRMS-ESI** (*m/z*) calc'd for C<sub>12</sub>H<sub>10</sub>NaO<sub>3</sub>S<sub>2</sub>: [M+Na]<sup>+</sup>, 288.9969; Found, 288.9973.

**<sup>1</sup>H** and **<sup>13</sup>C NMR** of the product are in agreement with the literature.<sup>10a</sup>

**2-(methylsulfonyl)-1-phenylethan-1-one (48):**

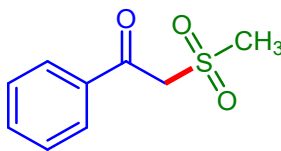

The titled compound was synthesized according to the general procedure **B** and was obtained as a white solid.

**Yield:** 95% (37.7 mg).

**R<sub>f</sub>:** 0.24 (Mobile phase: 20% EtOAc in Hexane).

**mp:** 104-105 °C.

**<sup>1</sup>H NMR** (500 MHz, CDCl<sub>3</sub>, 300 K): δ (ppm) = 8.00-7.91 (m, 2H), 7.67 (d, *J* = 15.5 Hz, 1H), 7.47 (d, *J* = 11.0 Hz, 2H), 7.43-7.25 (m, 3H), 7.24-7.15 (m, 2H), 6.87 (d, *J* = 15.0 Hz, 1H).

**<sup>13</sup>C NMR** (126 MHz, CDCl<sub>3</sub>, 300 K): δ (ppm) = 165.7 (d, *J* = 254.4 Hz), 142.8, 136.9 (d, *J* = 3.3 Hz), 132.3, 131.4, 130.6 (d, *J* = 9.6 Hz), 129.2, 128.7, 127.2, 116.7 (d, *J* = 22.5 Hz).

**HRMS-ESI** (*m/z*) calc'd for C<sub>9</sub>H<sub>10</sub>NaO<sub>3</sub>S: [M+Na]<sup>+</sup>, 221.0248; Found, 221.0243.

**2-(ethylsulfonyl)-1-phenylethan-1-one (49):**

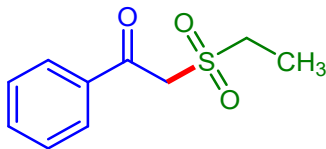

The titled compound was synthesized according to the general procedure **B** and was obtained as a white solid.

**Yield:** 87% (36.9 mg).

**R<sub>f</sub>:** 0.31 (Mobile phase: 20% EtOAc in Hexane).

**mp:** 79-80 °C.

**<sup>1</sup>H NMR** (500 MHz, CDCl<sub>3</sub>, 300 K): δ (ppm) = 7.75 (d, *J* = 8.0 Hz, 1H), 7.70 (d, *J* = 15.5 Hz, 1H), 7.64 (dt, *J* = 8.0, 2.0 Hz, 1H), 7.56-7.46 (m, 3H), 7.44-7.36 (m, 3H), 7.30 (td, *J* = 8.5, 2.5 Hz, 1H), 6.87 (d, *J* = 15.5 Hz, 1H).

**<sup>13</sup>C NMR** (126 MHz, CDCl<sub>3</sub>, 300 K): δ (ppm) = 162.6 (d, *J* = 250.6 Hz), 143.6, 142.9 (d, *J* = 6.6 Hz), 132.2, 131.6, 131.4 (d, *J* = 7.6 Hz), 129.2, 128.8, 126.6, 123.6 (d, *J* = 3.5 Hz), 120.8, 120.7, 115.0 (d, *J* = 24.3 Hz).

**HRMS-ESI** (*m/z*) calc'd for C<sub>10</sub>H<sub>12</sub>NaO<sub>3</sub>S: [M+Na]<sup>+</sup>, 235.0405; Found, 235.0402.

**1-phenyl-2-(propylsulfonyl)ethan-1-one (50):**

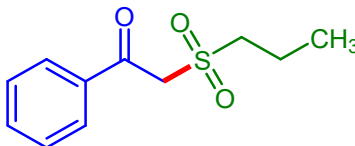

The titled compound was synthesized according to the general procedure **B** and was obtained as a white solid.

**Yield:** 89% (40.3 mg).

**R<sub>f</sub>:** 0.37 (Mobile phase: 20% EtOAc in Hexane).

**mp:** 68-69 °C.

**<sup>1</sup>H NMR** (500 MHz, CDCl<sub>3</sub>, 300 K): δ (ppm) = 8.09 (d, *J* = 8.5 Hz, 2H), 7.82 (d, *J* = 8.5 Hz, 2H), 7.75 (d, *J* = 15.5 Hz, 1H), 7.52-7.48 (m, 2H), 7.46-7.39 (m, 3H), 6.85 (d, *J* = 15.5 Hz, 1H).

**<sup>13</sup>C NMR** (126 MHz, CDCl<sub>3</sub>, 300 K): δ (ppm) = 144.3 (d, *J* = 31.5 Hz), 135.2 (d, *J* = 32.9 Hz), 132.1, 131.7, 129.3, 128.8, 128.3, 126.6 (d, *J* = 3.9 Hz), 126.3, 124.3, 122.1.

**HRMS-ESI** (*m/z*) calc'd for C<sub>11</sub>H<sub>14</sub>NaO<sub>3</sub>S: [M+Na]<sup>+</sup>, 249.0561; Found, 249.0556.

**2-(butylsulfonyl)-1-phenylethan-1-one (51):**

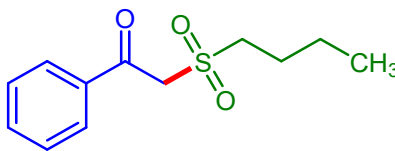

The titled compound was synthesized according to the general procedure **B** and was obtained as a white solid.

**Yield:** 47% (22.7 mg).

**R<sub>f</sub>:** 0.43 (Mobile phase: 20% EtOAc in Hexane).

**mp:** 84-85 °C.

**<sup>1</sup>H NMR** (500 MHz, CDCl<sub>3</sub>, 300 K): δ (ppm) = 8.00 (d, *J* = 9.0 Hz, 2H), 7.71 (d, *J* = 15.5 Hz, 1H), 7.50 (dd, *J* = 8.0, 1.5 Hz, 2H), 7.46-7.35 (m, 5H), 6.85 (d, *J* = 15.5 Hz, 1H).

**<sup>13</sup>C NMR** (126 MHz, CDCl<sub>3</sub>, 300 K): δ (ppm) = 152.8, 143.4, 139.1, 132.2, 131.6, 130.0, 129.3, 128.8, 126.8, 121.3 (d, *J*=1.4 Hz), 119.2.

**HRMS-ESI** (*m/z*) calc'd for C<sub>12</sub>H<sub>17</sub>O<sub>3</sub>S: [M+NH<sub>4</sub>]<sup>+</sup>, 258.1164; Found, 258.1159.

**2-(cyclopropylsulfonyl)-1-phenylethan-1-one (52):**

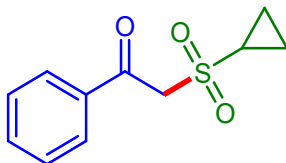

The titled compound was synthesized according to the general procedure **B** and was obtained as a white solid.

**Yield:** 77% (34.5 mg).

**R<sub>f</sub>** = 0.23 (Mobile phase: 20% EtOAc in Hexane).

**mp:** 67-68 °C.

**<sup>1</sup>H NMR** (500 MHz, CDCl<sub>3</sub>, 300 K): δ (ppm) = 8.55 (br.s, 1H), 7.99 (t, *J* = 7.3 Hz, 2H), 7.93-7.87 (m, 2H), 7.75 (d, *J* = 15.0 Hz, 1H), 7.68-7.60 (m, 2H), 7.50-7.47 (m, 2H), 7.42-7.36 (m, 3H), 6.92 (d, *J*=15.5 Hz, 1H).

**<sup>13</sup>C NMR** (126 MHz, CDCl<sub>3</sub>, 300 K): δ (ppm) = 142.7, 137.6, 135.3, 132.5, 132.4, 131.3, 129.8, 129.5, 129.3, 129.3, 129.2, 128.7, 128.1, 127.8, 127.4, 122.7.

**HRMS-ESI** (*m/z*) calc'd for C<sub>11</sub>H<sub>12</sub>NaO<sub>3</sub>S: [M+Na]<sup>+</sup>, 247.0405; Found, 247.0405.

**<sup>1</sup>H** and **<sup>13</sup>C NMR** of the product are in agreement with the literature.<sup>10c</sup>

**(Z)-1-(1-(4-methoxyphenyl)-2-tosylethylidene)-2-phenylhydrazine (53):**

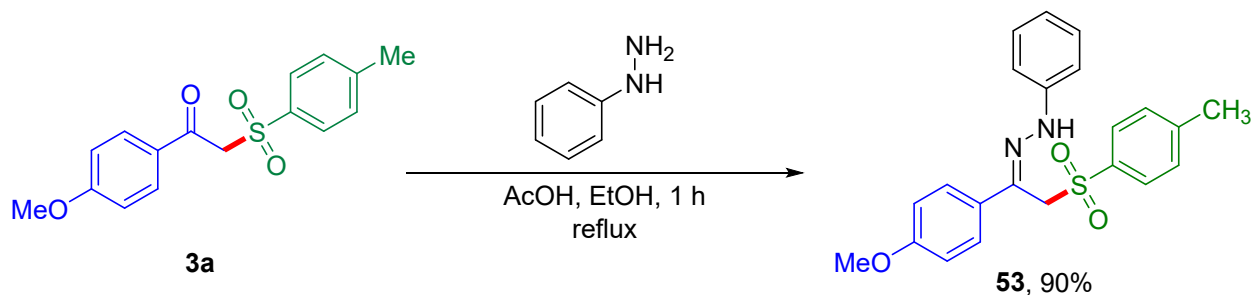

Compound **53** was prepared according to the synthesis procedure described in the literature.<sup>11</sup> To an oven-dried 10 mL round bottom flask, **3a** (274 mg, 1.0 mmol) in ethanol (5.0 mL) and phenylhydrazine (108.1 mg, 1 mmol) and catalytic amount of acetic acid were added. The reaction mixture was refluxed for 1 h. After cooling, the precipitated product was filtered off, washed with ethanol and dried. Recrystallization from EtOH afforded compound **53** as a white solid.

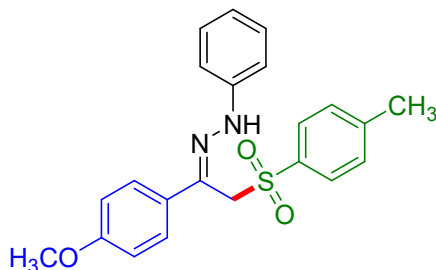

**Yield:** 90% (319.5 mg).

**R<sub>f</sub>** = 0.43 (Mobile phase: 20% EtOAc in Hexane).

**mp:** 140-141 °C.

**<sup>1</sup>H NMR** (500 MHz, DMSO-*d*<sub>6</sub>, 300 K):  $\delta$  (ppm) = 8.57 (s, 1H), 6.82 (d, *J* = 8.0 Hz, 2H), 6.73 (dt, *J* = 9.0, 3.0 Hz, 2H), 6.37 (d, *J* = 8.0 Hz, 2H), 6.31 (t, *J* = 8.5 Hz, 2H), 6.15 (d, *J* = 8.0 Hz, 2H), 5.94 (d, *J* = 9.0 Hz, 2H), 5.88 (t, *J* = 7.0 Hz, 2H), 4.15 (s, 2H), 2.85 (s, 3H), 1.32 (s, 3H).

**<sup>13</sup>C NMR** (126 MHz, DMSO-*d*<sub>6</sub>, 300 K):  $\delta$  (ppm) = 159.4, 145.4, 145.1, 136.9, 130.8, 130.3, 129.9, 129.4, 128.7, 127.6, 120.0, 113.9, 113.3, 55.7, 52.6, 21.5.

**HRMS-ESI** (*m/z*) calc'd for C<sub>22</sub>H<sub>22</sub>N<sub>2</sub>NaO<sub>3</sub>S: [M+Na]<sup>+</sup>, 417.1249; Found, 417.1250.

**2-(4-methoxyphenyl)-1H-benzo[d]imidazole (54):**

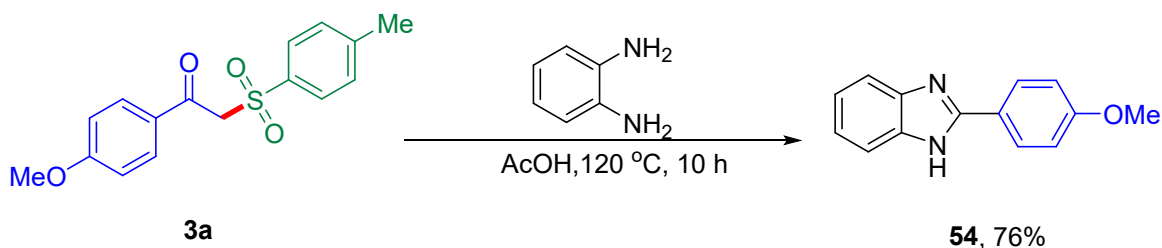

Compound **54** was prepared according to the synthesis procedure described in the literature.<sup>12</sup> To an oven-dried 10 mL round bottom flask, **3a** (54.8 mg, 0.2 mmol), acetic acid (1.0 mL) and *o*-phenyldiamine (38.2 mg, 0.2 mmol, 1.0 equiv) were added in this sequence. The resulting mixture was stirred at 120 °C for 10 h. Finally, all volatile components were removed in vacuum and the residue was purified by silica gel chromatography eluting with hexane/EtOAc to afford the product **54** as a peach color solid.

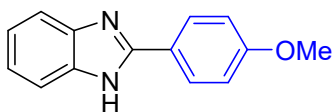

**Yield:** 76% (30.7 mg).

**R<sub>f</sub>** = 0.34 (Mobile phase: 50% EtOAc in Hexane).

**mp:** 224-225 °C.

**<sup>1</sup>H NMR** (500 MHz, DMSO-*d*<sub>6</sub>, 300 K): δ (ppm) = 8.10 (d, *J* = 8.5 Hz, 2H), 7.69 (s, 2H), 7.31 (s, 2H), 7.05 (d, *J* = 8.5 Hz, 2H), 3.75 (s, 3H).

**<sup>13</sup>C NMR** (126 MHz, DMSO-*d*<sub>6</sub>, 300 K): δ (ppm) = 162.8, 150.1, 134.6, 129.8, 124.8, 117.8, 115.3, 114.7, 56.1.

**HRMS-ESI** (*m/z*) calc'd for C<sub>14</sub>H<sub>12</sub>N<sub>2</sub>NaO: [M+Na]<sup>+</sup>, 247.0847; Found, 247.0849.

**(Z)-1-(4-methoxyphenyl)-2-tosylethan-1-one oxime (55):**

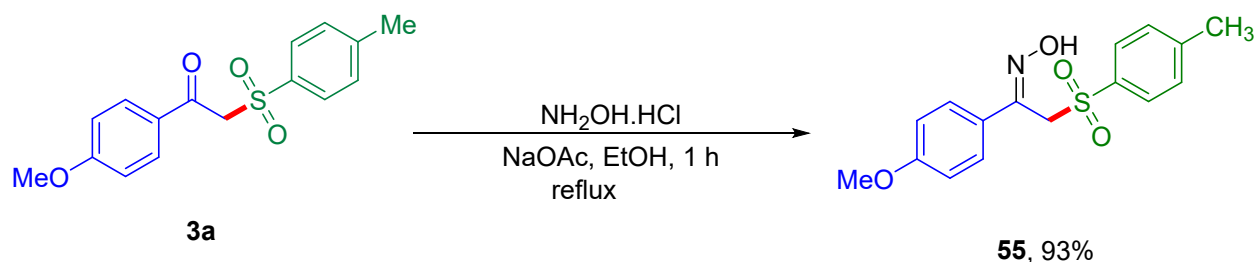

Compound **55** was prepared according to the synthesis procedure described in the literature.<sup>11</sup> To an oven-dried 10 mL round bottom flask, **3a** (274 mg, 1 mmol), NH<sub>2</sub>OH. HCl (105 mg, 1.5 mmol), anhydrous NaOAc (123 mg, 1.5 mmol) and 5 mL of EtOH were taken. The flask was fitted with a condenser and the reaction mixture was stirred in a preheated oil bath at 80 °C for 1 h. Next, the reaction mixture was cooled to room temperature. Following that, it was poured into cold water and the solid product was filtered off and washed with water to afford the product **55** as a white solid.

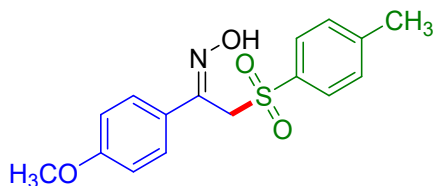

**Yield:** 93% (267.4 mg).

**R<sub>f</sub>** = 0.29 (Mobile phase: 20% EtOAc in Hexane).

**mp:** 163-164 °C.

**<sup>1</sup>H NMR** (500 MHz, DMSO-*d*<sub>6</sub>, 300 K): δ (ppm) = 11.5 (s, 1H), 7.58-7.51 (m, 4H), 7.30 (d, *J* = 7.5 Hz, 2H), 6.85 (dt, *J* = 9.0, 3.0 Hz, 2H), 4.82 (s, 2H), 3.72 (s, 3H), 2.32 (s, 3H).

**<sup>13</sup>C NMR** (126 MHz, DMSO-*d*<sub>6</sub>, 300 K): δ (ppm) = 160.5, 145.7, 144.9, 137.4, 130.0, 128.4, 128.3, 127.5, 114.1, 55.7, 51.9, 21.6.

**HRMS-ESI** (*m/z*) calc'd for C<sub>16</sub>H<sub>17</sub>NNaO<sub>4</sub>S: [M+Na]<sup>+</sup>, 342.0776; Found, 342.0770.

**6-chloro-2-(4-methoxyphenyl)-4-phenyl-3-tosylquinoline (56):**

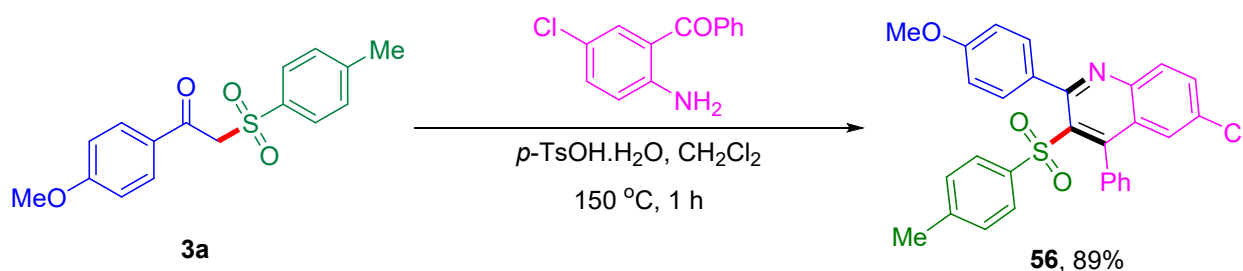

Compound **56** was prepared according to the synthesis procedure described in the literature.<sup>13</sup> A mixture of 2-aminobenzophenones (0.6 mmol), β-ketosulfones **3a** (0.5 mmol), and *p*-toluenesulfonic acid monohydrate (0.1 mmol) in dichloromethane (10 mL) was added and flask was stirred at 150 °C for 1 h. The consumption of the starting materials was confirmed by TLC. The reaction mixture was cooled to 25 °C, and the mixture containing the crude product was transferred to a 100 mL round bottom flask and the solvent was concentrated. The residue was diluted with water (10 mL) and the mixture was extracted using CH<sub>2</sub>Cl<sub>2</sub> (3 × 15 mL). The combined organic layers were washed with brine, dried, filtered, and evaporated to afford crude products under reduced pressure. Purification on silica gel (hexanes/EtOAc = 4/1) afforded compound **56** as a white solid.

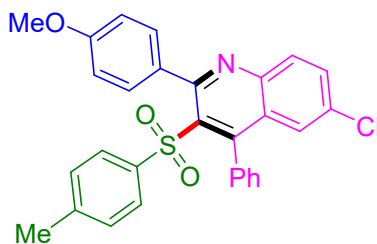

**Yield:** 89% (222.5 mg).

**R<sub>f</sub>** = 0.58 (Mobile phase: 20% EtOAc in Hexane).

**mp:** 230-231 °C.

**<sup>1</sup>H NMR** (500 MHz, CDCl<sub>3</sub>, 300 K): δ (ppm) = 8.08 (dd, *J* = 9.0, 1.5 Hz, 1H), 7.71 (dt, *J* = 9.0, 2.5 Hz, 1H), 7.53 (dd, *J* = 8.5, 2.0 Hz, 2H), 7.49-7.44 (m, 1H), 7.43-7.38 (m, 3H), 7.23 (t, *J* = 7.5 Hz, 2H), 6.98-6.84 (m, 6H), 3.86 (s, 3H), 2.29 (s, 3H).

**<sup>13</sup>C NMR** (126 MHz, CDCl<sub>3</sub>, 300 K): δ (ppm) = 160.4, 157.9, 150.5, 146.1, 143.1, 139.0, 134.4, 134.3, 133.5, 133.3, 132.9, 131.1, 131.0, 130.3, 128.9, 128.1, 127.2, 127.1, 126.0, 113.4, 55.4, 21.6.

**HRMS-ESI** (m/z) calc'd for C<sub>29</sub>H<sub>23</sub>ClNO<sub>3</sub>S: [M+H]<sup>+</sup>, 500.1087; Found, 500.1083.

<sup>1</sup>H and <sup>13</sup>C NMR of the product are in agreement with the literature.<sup>13</sup>

**1-(4-methoxyphenyl)-2-tosylethan-1-ol (57):**

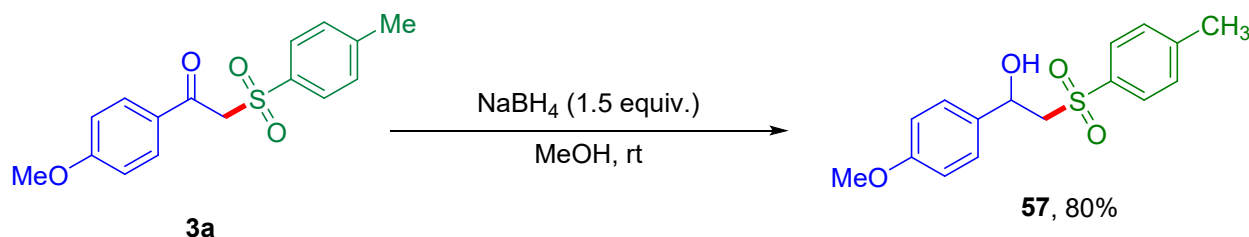

Compound **57** was prepared according to the synthesis procedure described in the literature.<sup>14a</sup> To an oven-dried 10 mL round bottom flask, Sodium borohydride (0.3 mmol, 1.5 equiv.) was gradually added to a solution of **3a** (56 mg, 0.2 mmol, 1.0 equiv.) in anhydrous methanol (2.0 mL) and stirred at room temperature for an hour. TLC analysis was used to trace the course of the reaction, and once it was finished, the solvent was removed under reduced pressure, and the crude was given an ice-cold water treatment. Ethyl acetate (3 x 10 mL) was used to remove the aqueous layer after it had been made acidic (pH 2). The mixed organic layers were concentrated after being dried over sodium sulfate. Hexanes/ethyl acetate (9:1, v/v) was used as the eluent in column chromatographic to purify the reaction mixture. The compound **57** was obtained as a yellow oil.

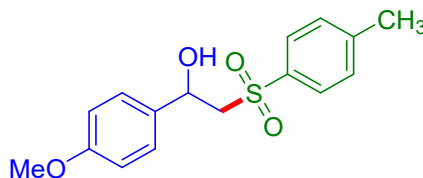

**Yield:** 80% (45.1 mg).

**R<sub>f</sub>** = 0.41 (Mobile phase: 20% EtOAc in Hexane).

**<sup>1</sup>H NMR** (500 MHz, CDCl<sub>3</sub>, 300 K): δ (ppm) = 7.81 (dt, *J* = 8.0, 2.0 Hz, 2H), 7.36 (d, *J* = 8.0 Hz, 2H), 7.19 (dt, *J* = 6.5, 2.5 Hz, 2H), 6.82 (dt, *J* = 9.0, 3.0 Hz, 2H), 5.18 (dd, *J* = 10.0, 1.5 Hz, 1H), 3.76 (s, 3H), 3.72 (d, *J* = 5.5 Hz, 1H), 3.47 (q, *J* = 4.0 Hz, 1H), 3.28 (q, *J* = 14.3 Hz, 1H), 2.45 (s, 3H).

**<sup>13</sup>C NMR** (126 MHz, CDCl<sub>3</sub>, 300 K): δ (ppm) = 159.6, 145.3, 136.3, 133.0, 130.2, 128.1, 127.1, 114.2, 68.2, 64.0, 55.4, 21.8.

**HRMS-ESI** (m/z) calc'd for C<sub>16</sub>H<sub>18</sub>NaO<sub>4</sub>S: [M+Na]<sup>+</sup>, 329.0823; Found, 329.0827.

<sup>1</sup>H and <sup>13</sup>C NMR of the product are in agreement with the literature.<sup>14b</sup>

**(E)-1-methoxy-4-(2-tosylvinyl)benzene (58):**



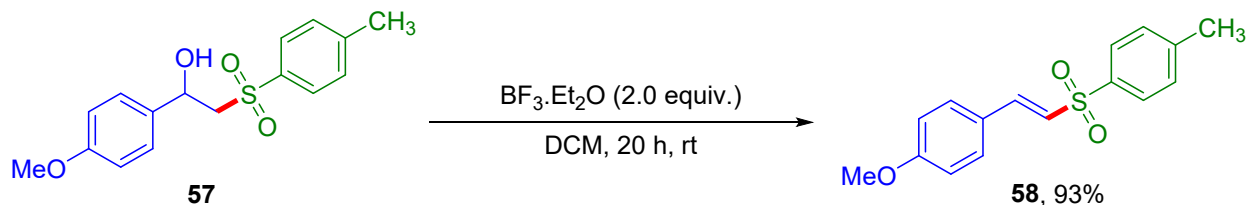

Compound **58** was prepared according to the synthesis procedure described in the literature.<sup>14c</sup> To an oven-dried 10 mL round bottom flask, reduced product **57** (0.1 mmol) was added, followed by the addition of  $\text{BF}_3 \cdot \text{Et}_2\text{O}$  (0.2 mmol) and DCM solvent. The reaction was stirred at room temperature for 20 hours. The dehydration of compound **57** led to the desired vinyl sulfone **58**. After the completion of the reaction, the solvent was evaporated in vacuo. The crude product was purified by column chromatography, eluting with Hexane/EtOAc to afford the desired product **58** as a white solid.

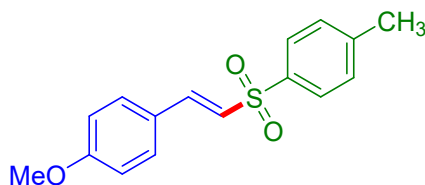

**Yield:** 93% (26.8 mg).

$R_f$  = 0.58 (Mobile phase: 20% EtOAc in Hexane).

**mp:** 96-97 °C.

**$^1\text{H}$  NMR** (500 MHz,  $\text{CDCl}_3$ , 300 K):  $\delta$  (ppm) = 7.83-7.79 (m, 2H), 7.59 (d,  $J$  = 15.5, 1H), 7.41(dt,  $J$  = 9.0, 3.0 Hz, 2H), 7.32 (d,  $J$  = 8.0 Hz, 2H), 6.88 (dt,  $J$  = 9.0, 3.0 Hz, 2H), 6.69 (d,  $J$  = 15.5 Hz, 1H), 3.81 (s, 3H), 2.41 (s, 3H).

**$^{13}\text{C}$  NMR** (126 MHz,  $\text{CDCl}_3$ , 300 K):  $\delta$  (ppm) = 162.1, 144.3, 141.9, 138.2, 130.4, 130.0, 127.6, 125.1, 124.8, 114.6, 55.5, 21.7.

**HRMS-ESI** ( $m/z$ ) calc'd for  $\text{C}_{16}\text{H}_{16}\text{NaO}_3\text{S}$ :  $[\text{M}+\text{Na}]^+$ , 311.0718; Found, 311.0721.

$^1\text{H}$  and  $^{13}\text{C}$  NMR of the product are in agreement with the literature.<sup>14d</sup>

#### (S)-1-(4-methoxyphenyl)-2-tosylpent-4-yn-1-one (**59**):

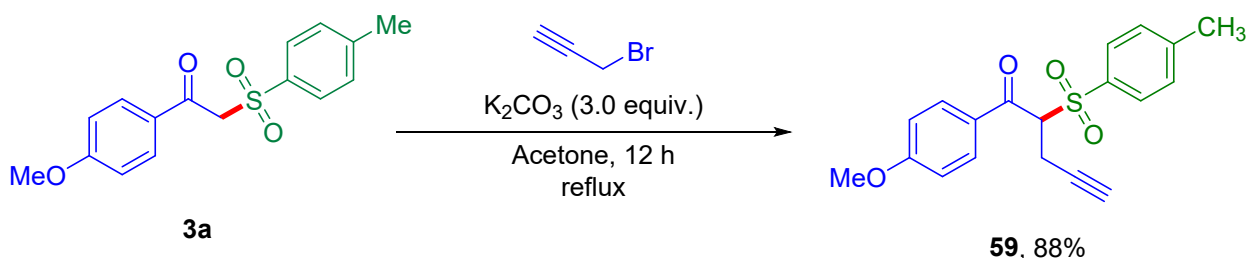

Compound **59** was prepared according to the synthesis procedure described in the literature.<sup>15</sup> To an oven-dried 10 mL round bottom flask,  $\text{K}_2\text{CO}_3$  (3.0 equiv.) was added to a solution of **3a** (0.5 mmol, 1.0 equiv.) in acetone (2 mL). The reaction mixture was agitated at room temperature for 10 minutes. After that, propargylic bromide (1.1 equiv.) was added to the reaction mixture at room temperature. The

reaction mixture was stirred at reflux for 12 hours. The reaction mixture was cooled to room temperature before being concentrated and extracted with EtOAc. The mixed organic layers were washed with brine, dried, filtered, and evaporated to obtain a crude product at reduced pressure. Purification on silica gel (hexanes/EtOAc) afforded the product **59** as a white solid.

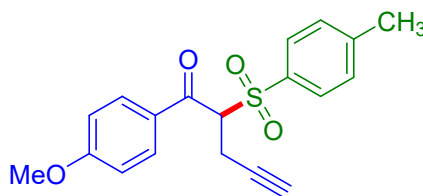

**Yield:** 88% (150.7 mg).

**R<sub>f</sub>** = 0.31 (Mobile phase: 20% EtOAc in Hexane).

**mp:** 114-115 °C.

**<sup>1</sup>H NMR** (500 MHz, CDCl<sub>3</sub>, 300 K): δ (ppm) = 7.93 (dt, *J* = 9.0, 3.0 Hz, 2H), 7.59 (dt, *J* = 8.0, 2.0 Hz, 2H), 7.26 (d, *J* = 8.0 Hz, 2H), 6.90 (dt, *J* = 9.0, 3.0 Hz, 2H), 5.19 (dd, *J* = 9.8, 4.5 Hz, 1H), 3.83 (s, 3H), 2.98-2.86 (m, 2H), 2.37 (s, 3H), 1.86 (t, *J* = 2.5 Hz, 1H).

**<sup>13</sup>C NMR** (126 MHz, CDCl<sub>3</sub>, 300 K): δ (ppm) = 188.9, 164.6, 145.9, 133.0, 131.8, 129.9, 129.8, 129.7, 114.1, 78.5, 71.2, 67.9, 55.7, 21.8, 18.3.

**HRMS-ESI** (*m/z*) calc'd for C<sub>19</sub>H<sub>18</sub>NaO<sub>4</sub>S: [M+Na]<sup>+</sup>, 365.0823; Found, 365.0822.

**(S)-1-(4-methoxyphenyl)-3-phenyl-2-tosylpropan-1-one (58):**

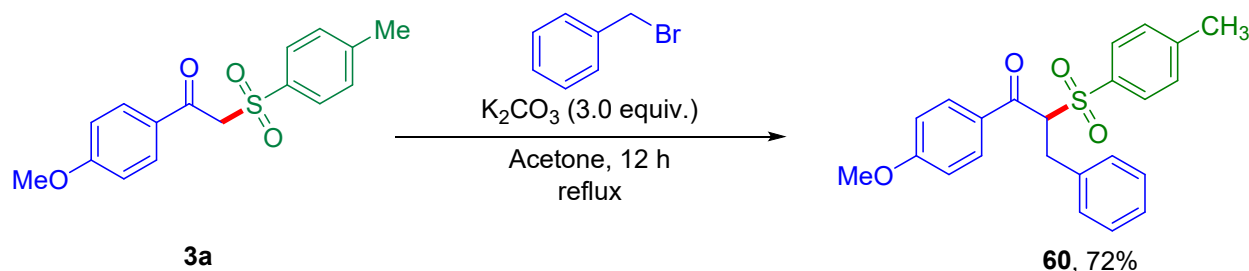

Compound **60** was prepared according to the synthesis procedure described in the literature.<sup>16</sup> To an oven-dried 10 mL round bottom flask, K<sub>2</sub>CO<sub>3</sub> (3.5 equiv.) was added to a solution of **3a** (0.5 mmol, 1.0 equiv.) in acetone (2 mL). For 10 minutes, the reaction mixture was agitated at room temperature. After that, benzyl bromide (1.1 equiv.) was added to the reaction mixture at room temperature. For 12 hours, the reaction mixture was stirred at reflux. The reaction mixture was cooled to room temperature before being concentrated and extracted with EtOAc/Hexane. The mixed organic layers were washed with brine, dried, filtered, and evaporated to obtain a crude product at reduced pressure. Purification on silica gel (hexanes/EtOAc) afforded the benzyl product **60** as a white solid.

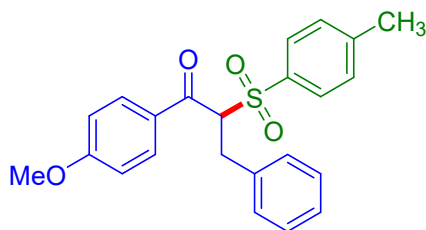

**Yield:** 72% (140.0 mg).

**R<sub>f</sub>** = 0.43 (Mobile phase: 20% EtOAc in Hexane).

**mp:** 108-109 °C.

**<sup>1</sup>H NMR** (500 MHz, CDCl<sub>3</sub>, 300 K): δ (ppm) = 7.76 (dt, *J* = 9.0, 3.0 Hz, 2H), 7.69 (dt, *J* = 8.0, 2.0 Hz, 2H), 7.32 (d, *J* = 8.0 Hz, 2H), 7.17-7.11 (m, 2H), 7.11-7.05 (m, 3H), 6.81 (dt, *J* = 9.0, 2.5 Hz, 2H), 5.25 (dd, *J* = 11.5, 3.0 Hz, 1H), 3.80 (s, 3H), 3.44 (dd, *J* = 13.3, 3.0 Hz, 1H), 3.33 (t, *J* = 11.5 Hz, 1H), 2.44 (s, 3H).

**<sup>13</sup>C NMR** (126 MHz, CDCl<sub>3</sub>, 300 K): δ (ppm) = 190.2, 164.2, 145.5, 136.3, 133.5, 131.5, 130.4, 129.9, 129.7, 129.0, 128.8, 127.0, 113.9, 71.2, 55.6, 34.0, 21.8.

**HRMS-ESI** (*m/z*) calc'd for C<sub>23</sub>H<sub>22</sub>NaO<sub>4</sub>S: [M+Na]<sup>+</sup>, 417.1136; Found, 417.1129.

**(S)-1-(4-methoxyphenyl)-2-tosylpent-4-en-1-one (61):**

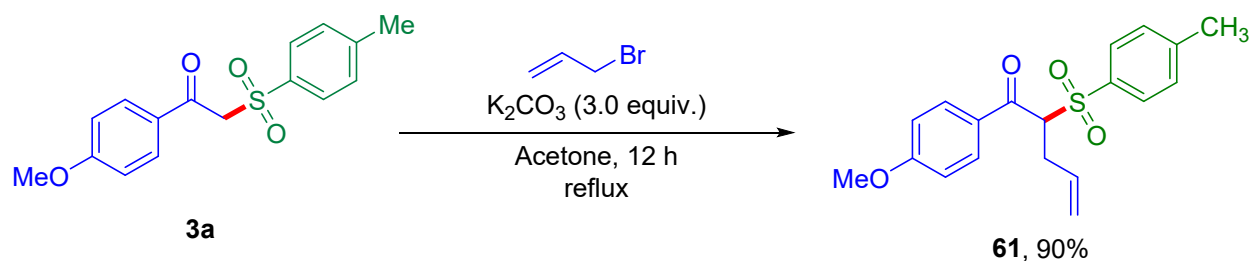

Compound **61** was prepared according to the synthesis procedure described in the literature.<sup>17</sup> At room temperature, K<sub>2</sub>CO<sub>3</sub> (2.0 equiv.) was added to a solution of **3a** (0.5 mmol, 1.0 equiv.) in acetone (2 mL). For 10 minutes, the reaction mixture was agitated at room temperature. Afterward, allyl bromide (1.1 equiv.) was added to the reaction mixture at room temperature. For 16 hours, the reaction mixture was stirred at reflux. The reaction mixture was cooled to room temperature before being concentrated and extracted with EtOAc/Hexane. The mixed organic layers were washed with brine, dried, filtered, and evaporated to obtain a crude product at reduced pressure. Purification on silica gel (hexanes/EtOAc) afforded the allyl product **61** as a yellow liquid.

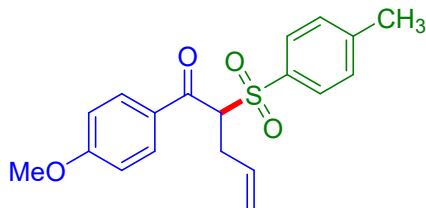

**Yield:** 90% (154.9 mg).

$R_f = 0.41$  (Mobile phase: 20% EtOAc in Hexane).

$^1\text{H}$  NMR (500 MHz,  $\text{CDCl}_3$ , 300 K):  $\delta$  (ppm) = 7.91 (dt,  $J = 12.0, 3.0$  Hz, 2H), 7.62 (dt,  $J = 8.5, 2.0$  Hz, 2H), 7.26 (d,  $J = 8.0$  Hz, 2H), 6.89 (dt,  $J = 9.0, 2.5$  Hz, 2H), 5.59-5.50 (m, 1H), 5.08 (dd,  $J = 10.3, 4.5$  Hz, 1H), 4.99 (dd,  $J = 18.5, 1.5$  Hz, 1H), 4.91 (dd,  $J = 10.0, 1.0$  Hz, 1H), 3.81 (s, 3H), 2.83-2.72 (m, 2H), 2.37 (s, 3H).

$^{13}\text{C}$  NMR (126 MHz,  $\text{CDCl}_3$ , 300 K):  $\delta$  (ppm) = 190.0, 164.4, 145.4, 133.5, 132.3, 131.6, 130.3, 129.8, 129.6, 118.8, 114.4, 60.0, 55.7, 33.4, 21.7.

HRMS-ESI ( $m/z$ ) calc'd for  $\text{C}_{19}\text{H}_{20}\text{NaO}_4\text{S}$ :  $[\text{M}+\text{Na}]^+$ , 367.0980; Found, 367.0977.

$^1\text{H}$  and  $^{13}\text{C}$  NMR of the product are in agreement with the literature.<sup>17</sup>

## 1,2-diphenyldisulfane

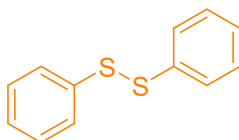

$^1\text{H}$  NMR (500 MHz,  $\text{CDCl}_3$ , 300 K):  $\delta$  (ppm) = 7.67–7.50 (m, 4H), 7.44–7.31 (m, 4H), 7.30–7.22 (m, 2H).

$^{13}\text{C}$  NMR (126 MHz,  $\text{CDCl}_3$ , 300 K):  $\delta$  (ppm) = 137.2, 129.3, 127.7, 127.3.

HRMS-ESI ( $m/z$ ) calc'd for  $\text{C}_{12}\text{H}_{10}\text{NaS}_2$ :  $[\text{M}+\text{Na}]^+$ , 241.0122; Found, 241.0128.

## 8.2 NMR copies of products

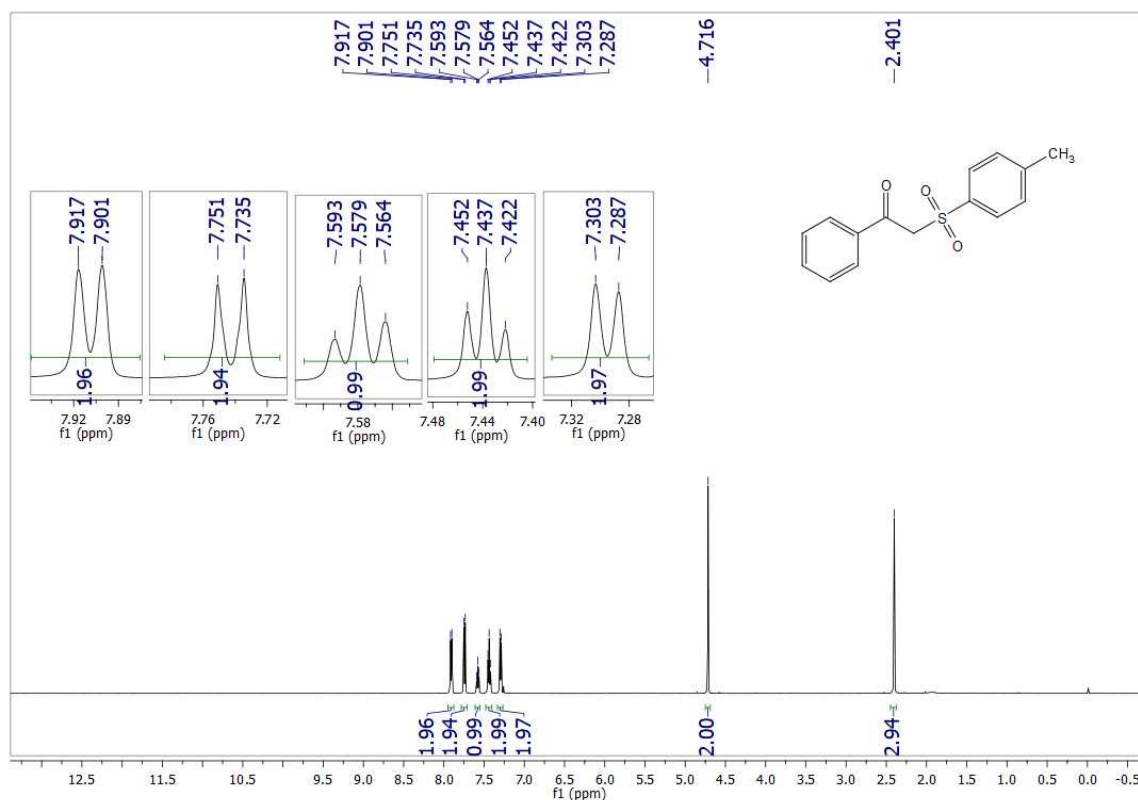

$^1\text{H}$  NMR (500 MHz,  $\text{CDCl}_3$ ) of compound 3.

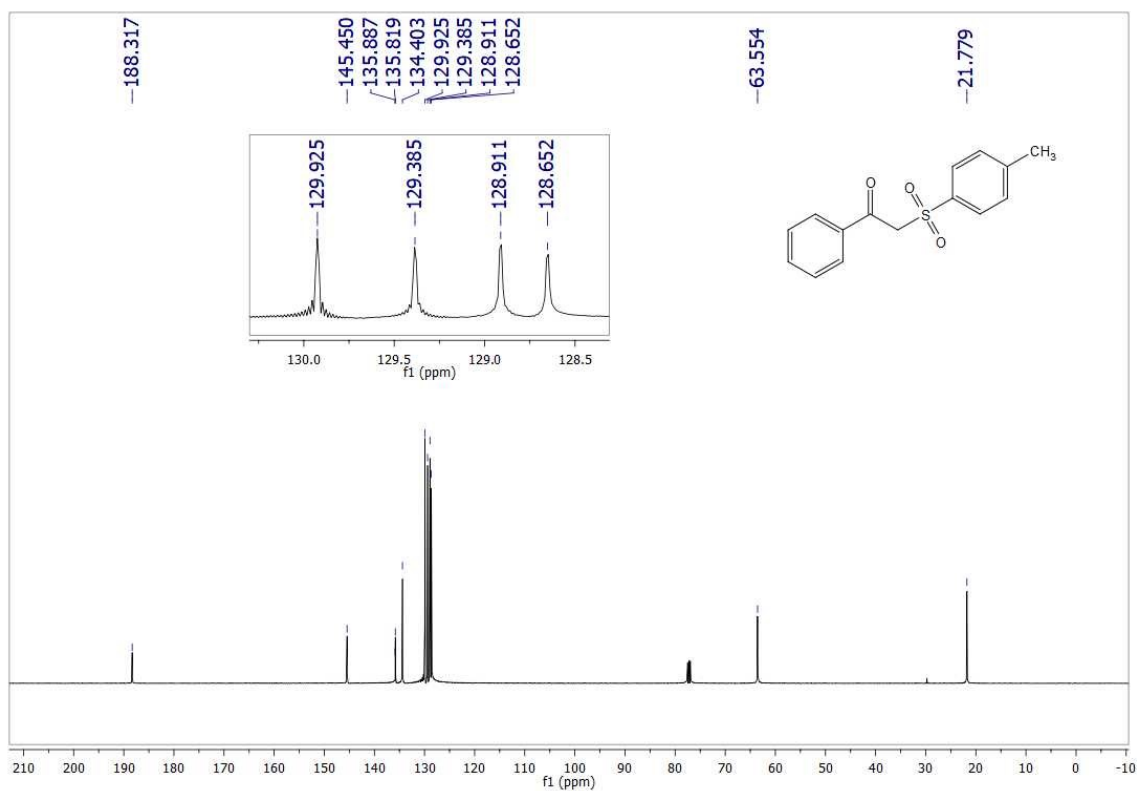

<sup>13</sup>C NMR (126 MHz, CDCl<sub>3</sub>) of compound **3**.

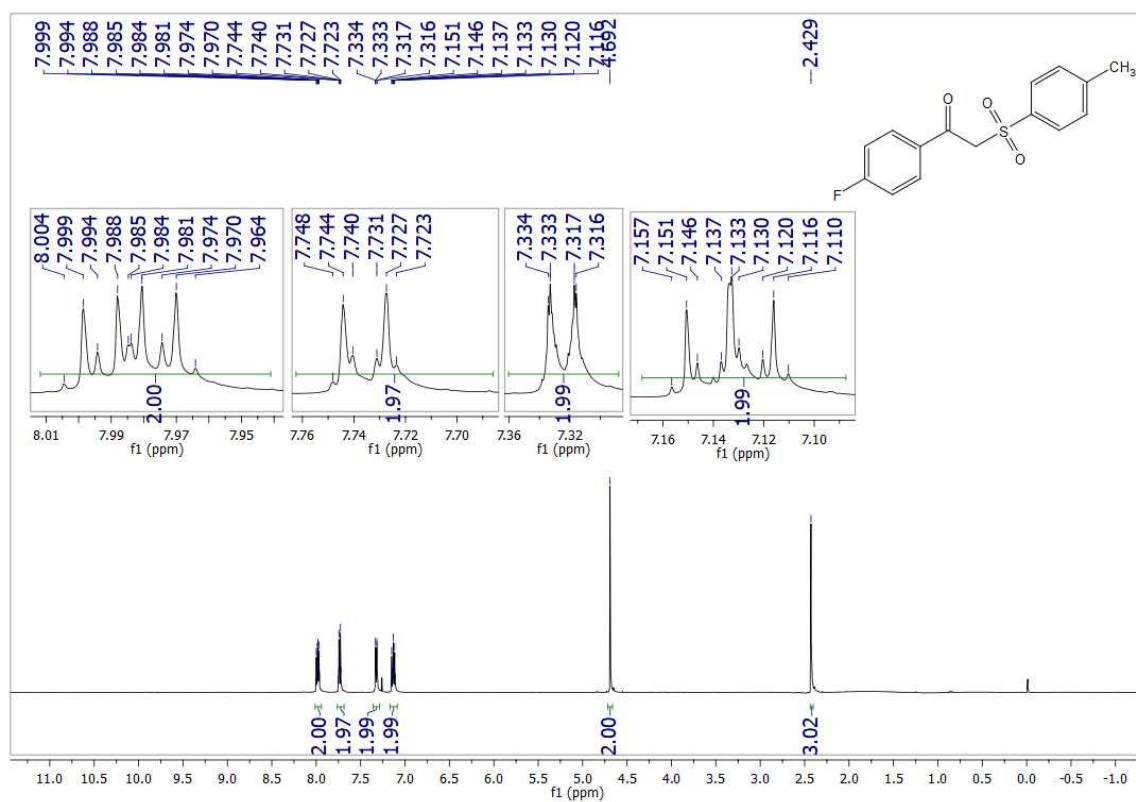

<sup>1</sup>H NMR (500 MHz, CDCl<sub>3</sub>) of compound **4**.

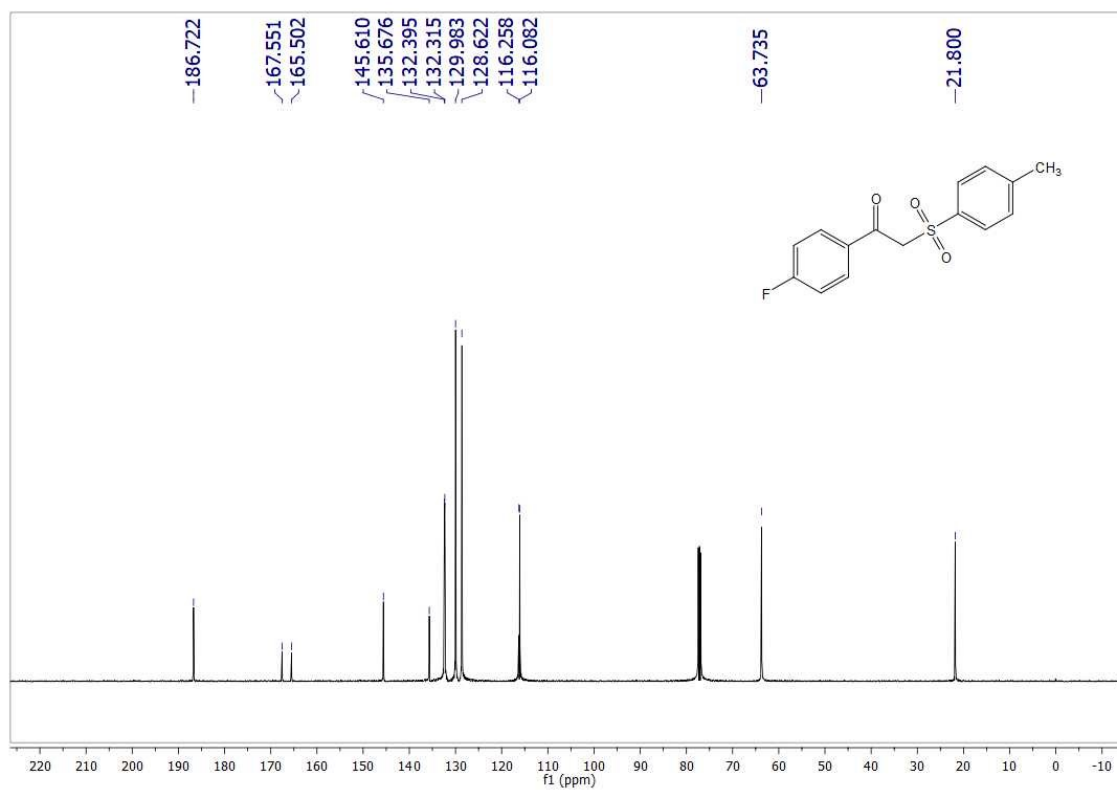

<sup>13</sup>C NMR (126 MHz, CDCl<sub>3</sub>) of compound 4.

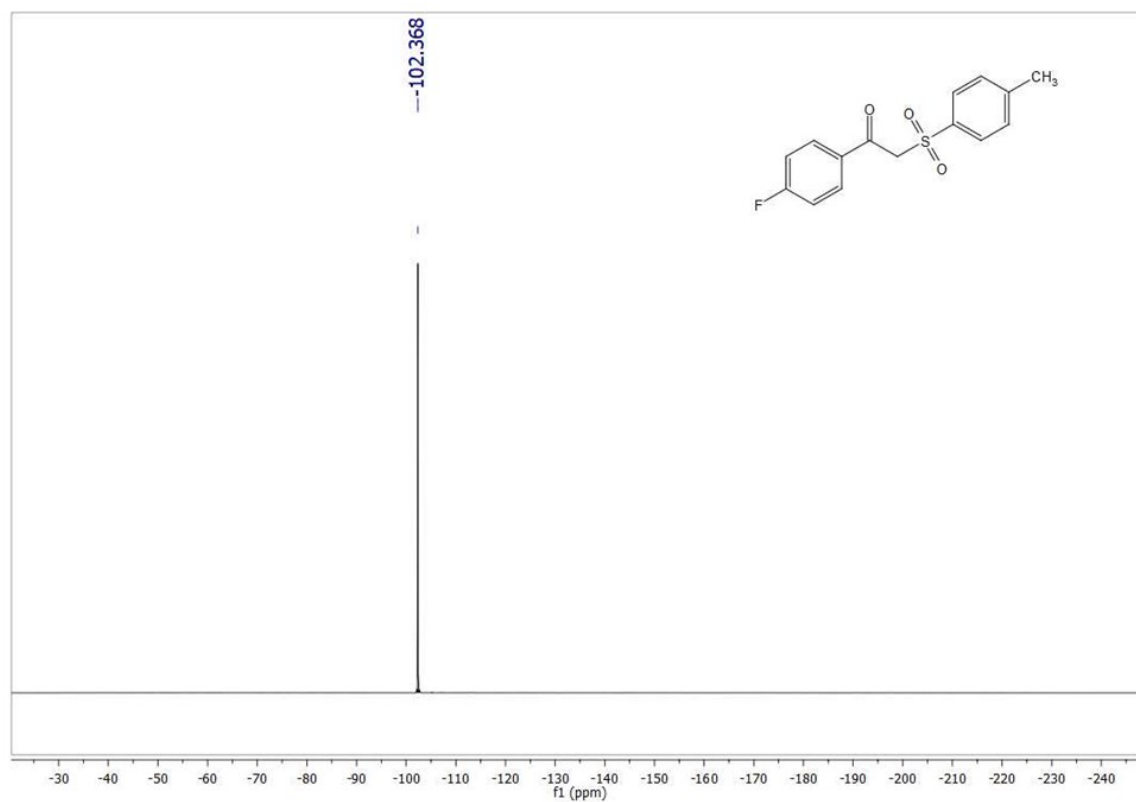

<sup>19</sup>F NMR (472 MHz, CDCl<sub>3</sub>) of compound 4.

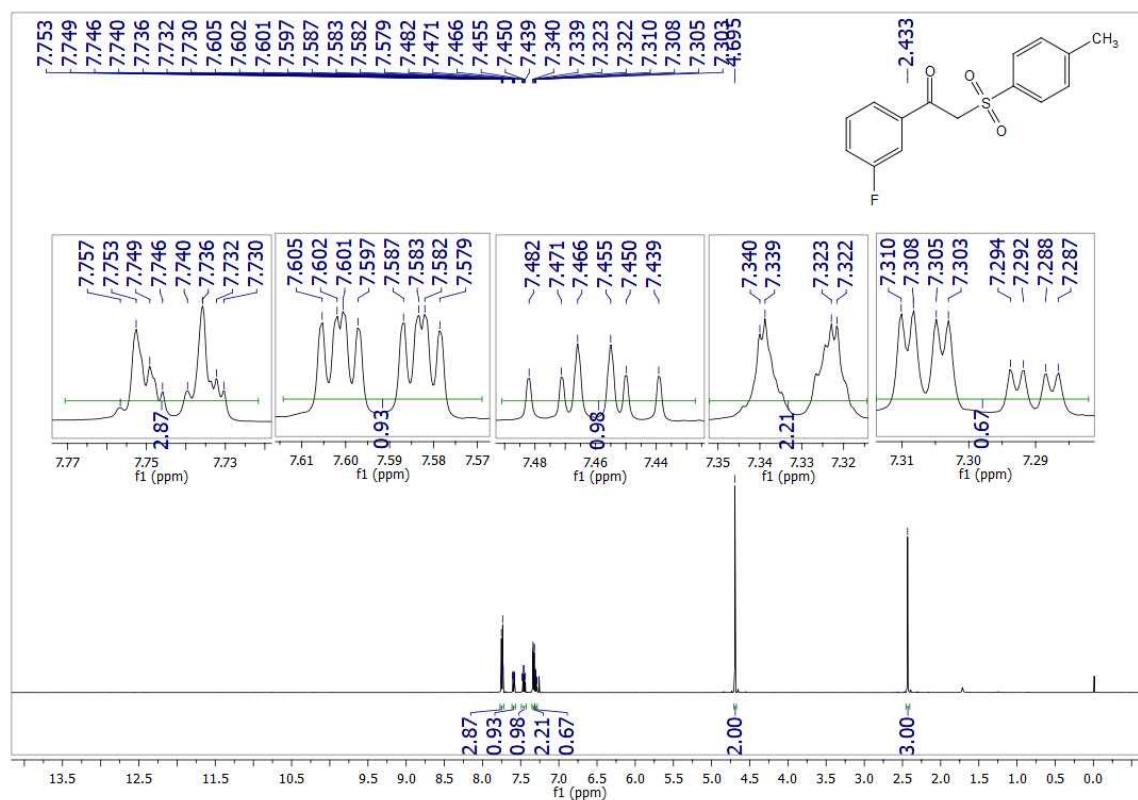

<sup>1</sup>H NMR (500 MHz, CDCl<sub>3</sub>) of compound **5**.

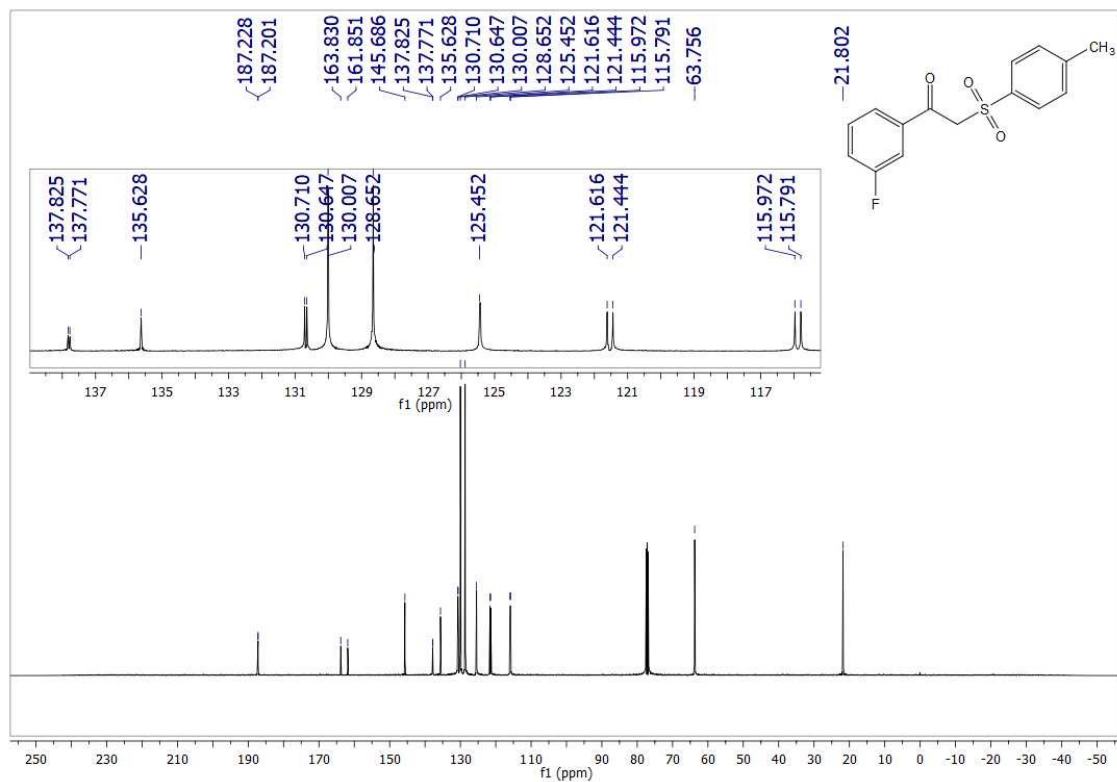

<sup>13</sup>C NMR (126 MHz, CDCl<sub>3</sub>) of compound **5**.

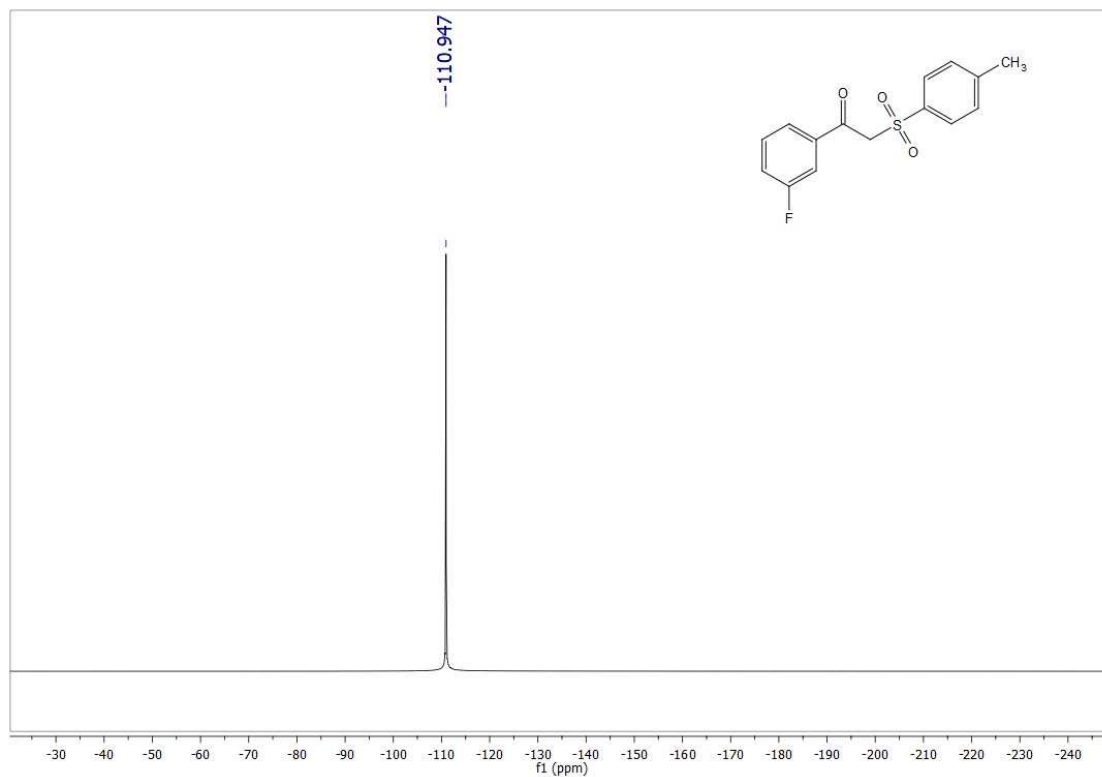

$^{19}\text{F}$  NMR (472 MHz,  $\text{CDCl}_3$ ) of compound 5.

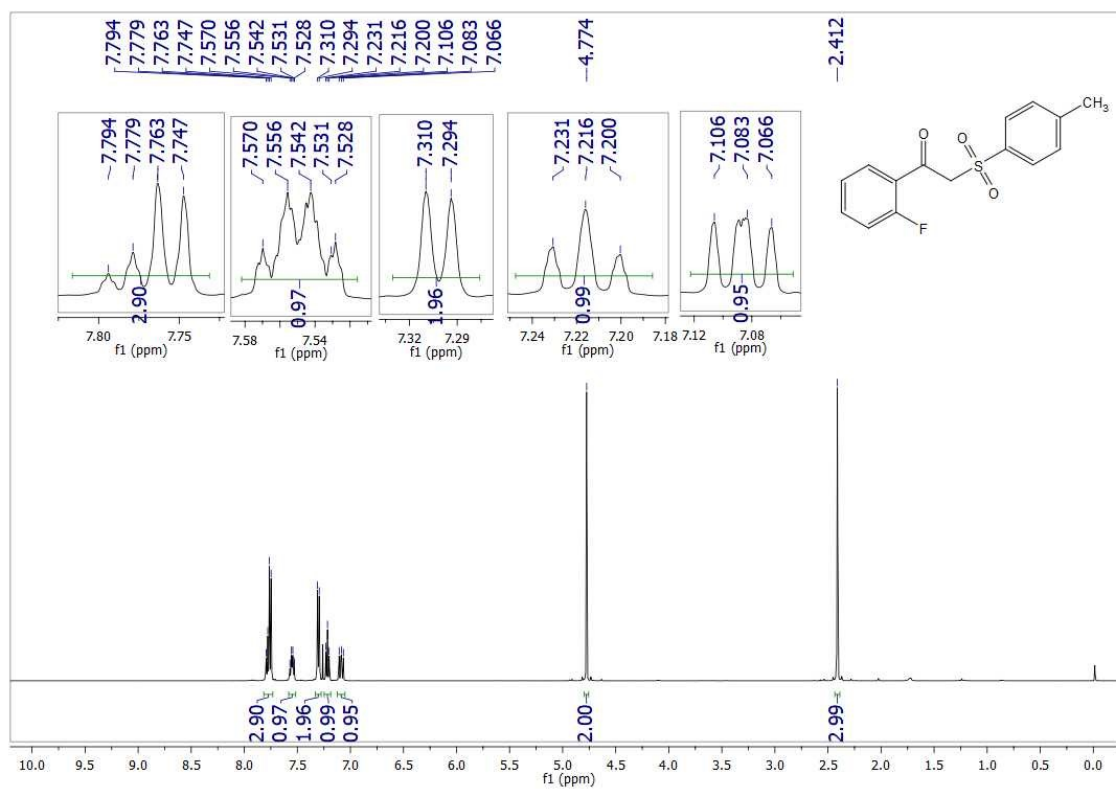

$^1\text{H}$  NMR (500 MHz,  $\text{CDCl}_3$ ) of compound 6.



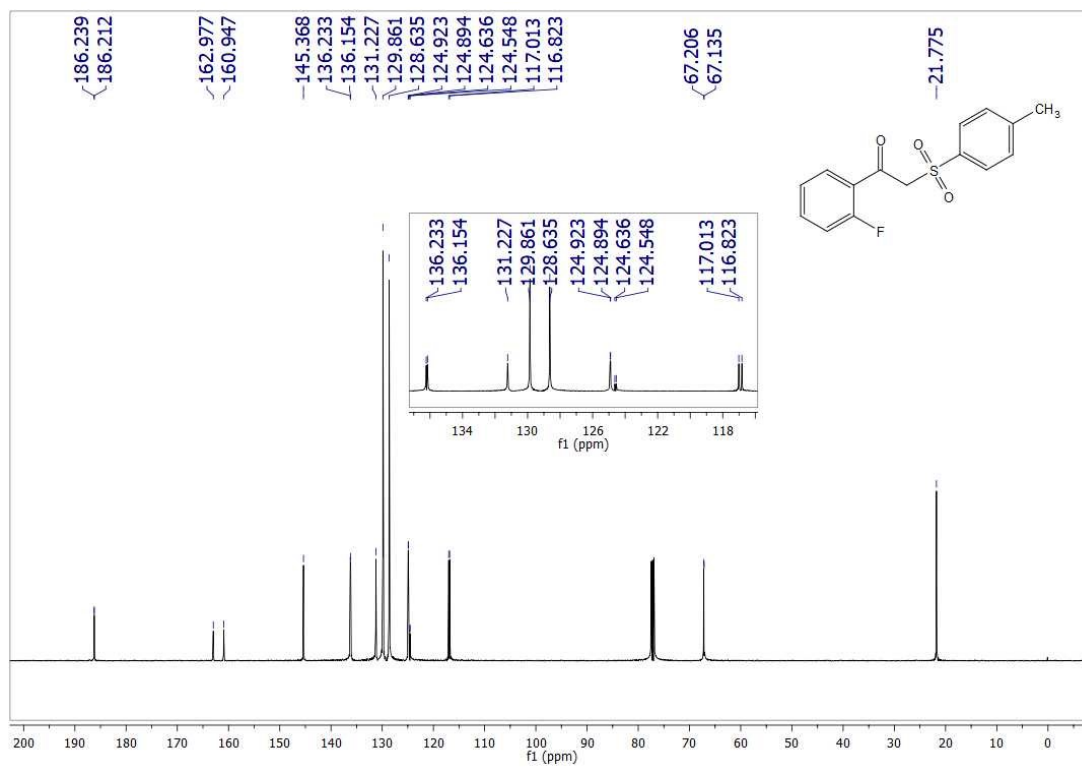

<sup>13</sup>C NMR (126 MHz, CDCl<sub>3</sub>) of compound **6**.

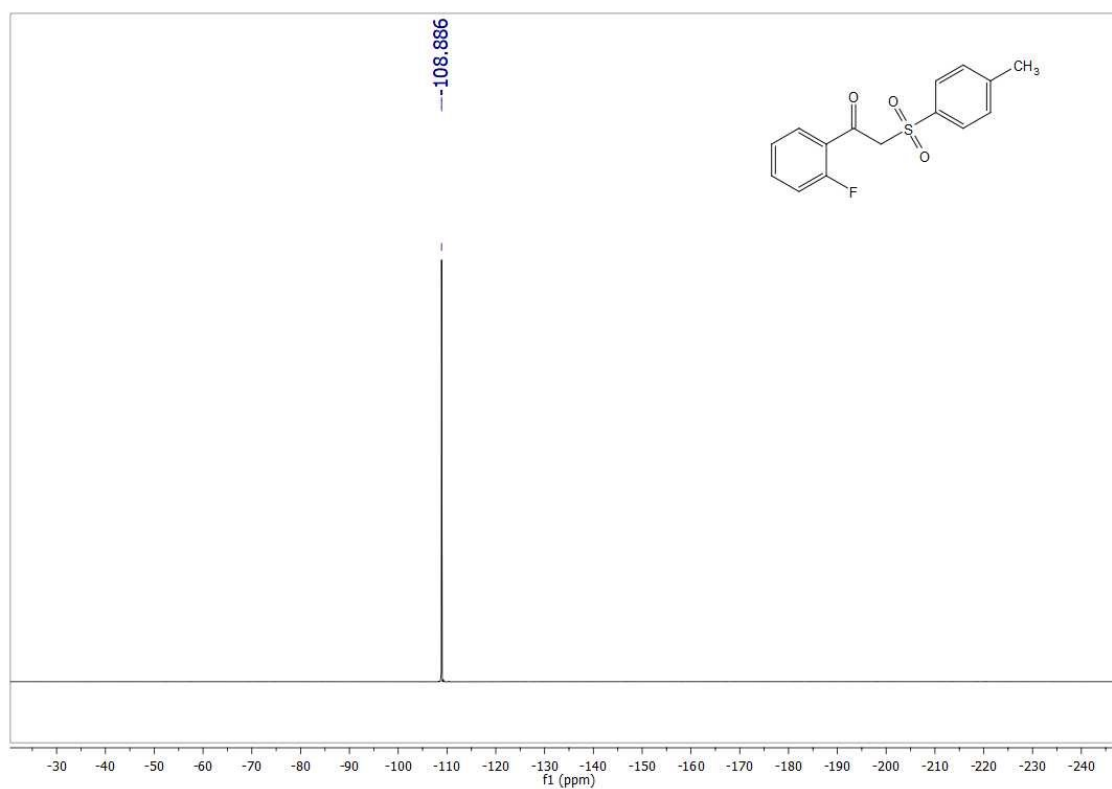

<sup>19</sup>F NMR (472 MHz, CDCl<sub>3</sub>) of compound **6**.

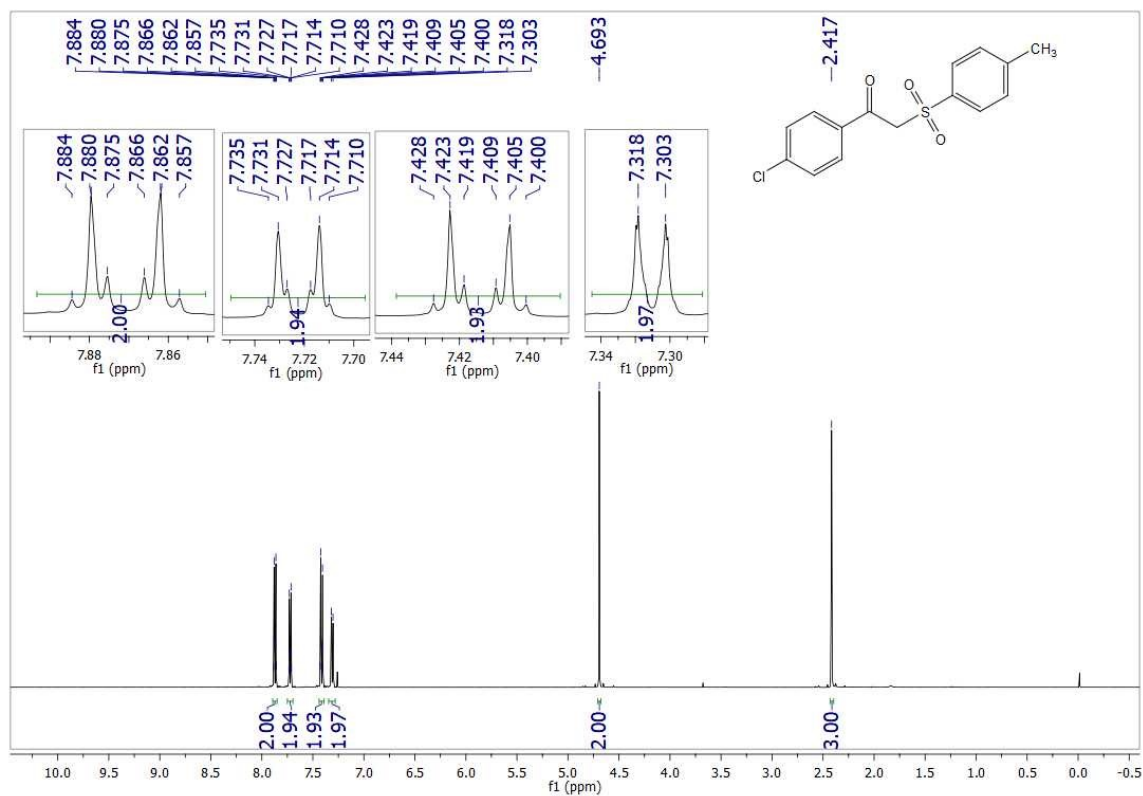

<sup>1</sup>H NMR (500 MHz, CDCl<sub>3</sub>) of compound 7.

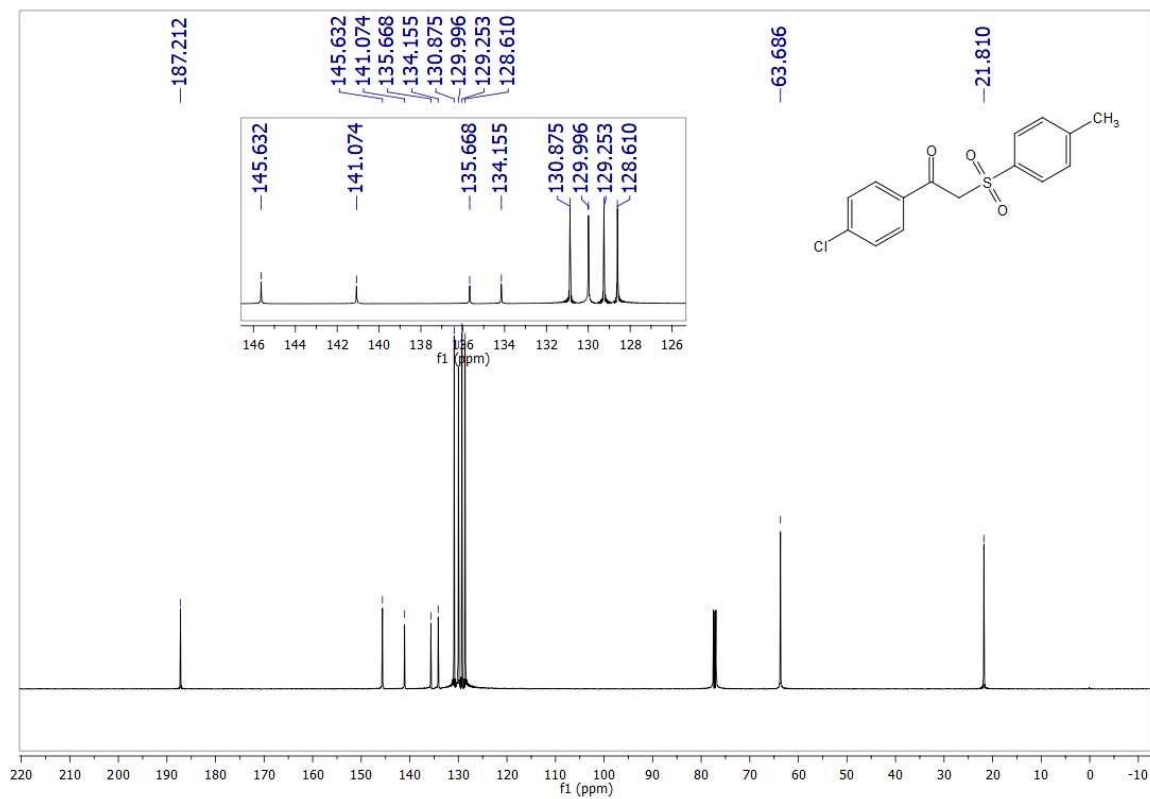

<sup>13</sup>C NMR (126 MHz, CDCl<sub>3</sub>) of compound 7.

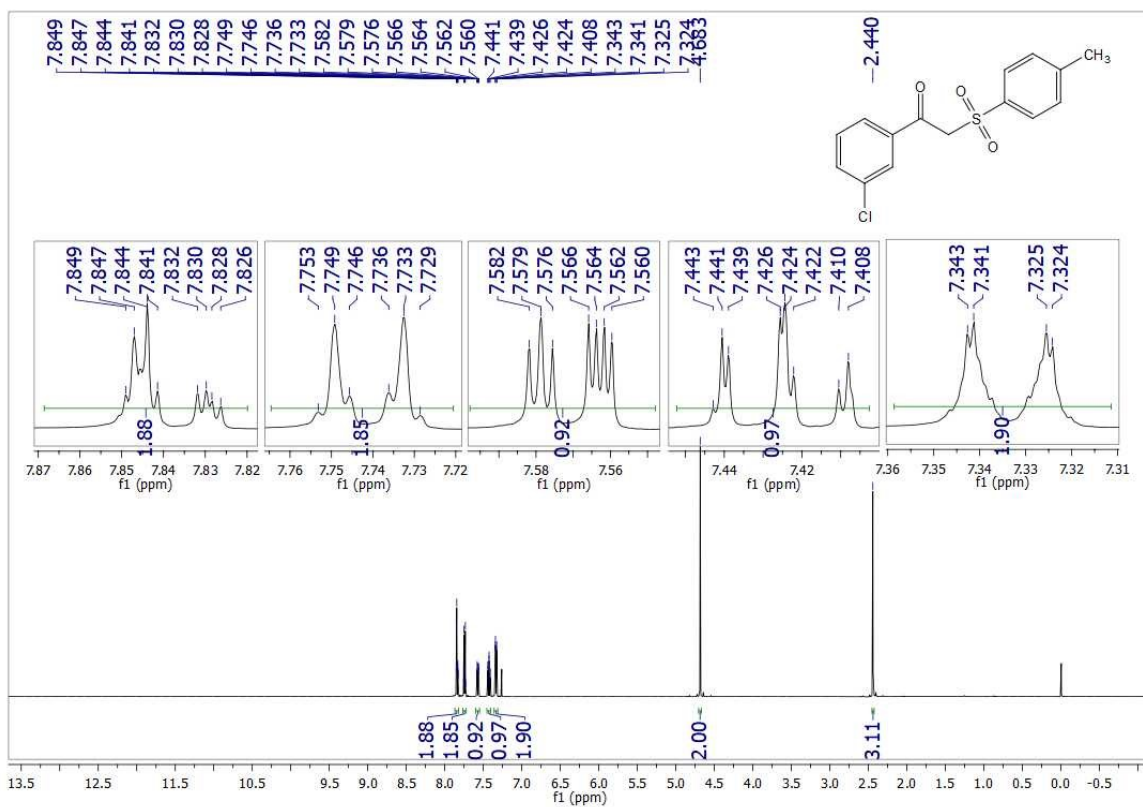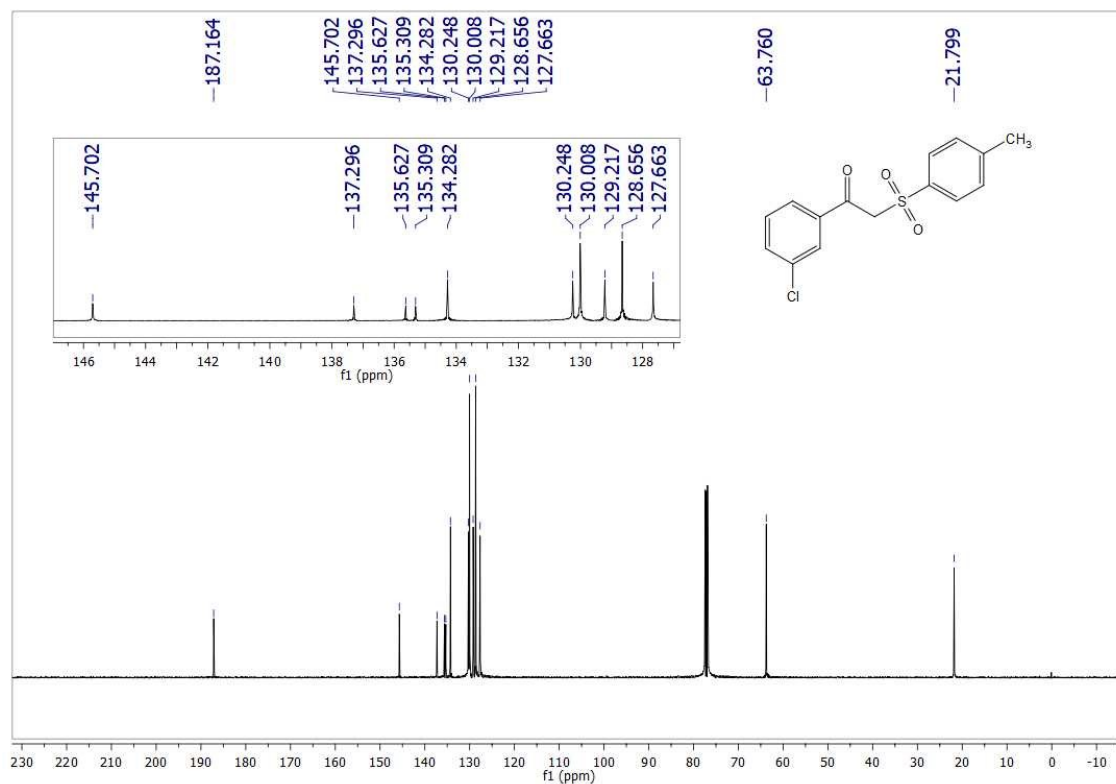

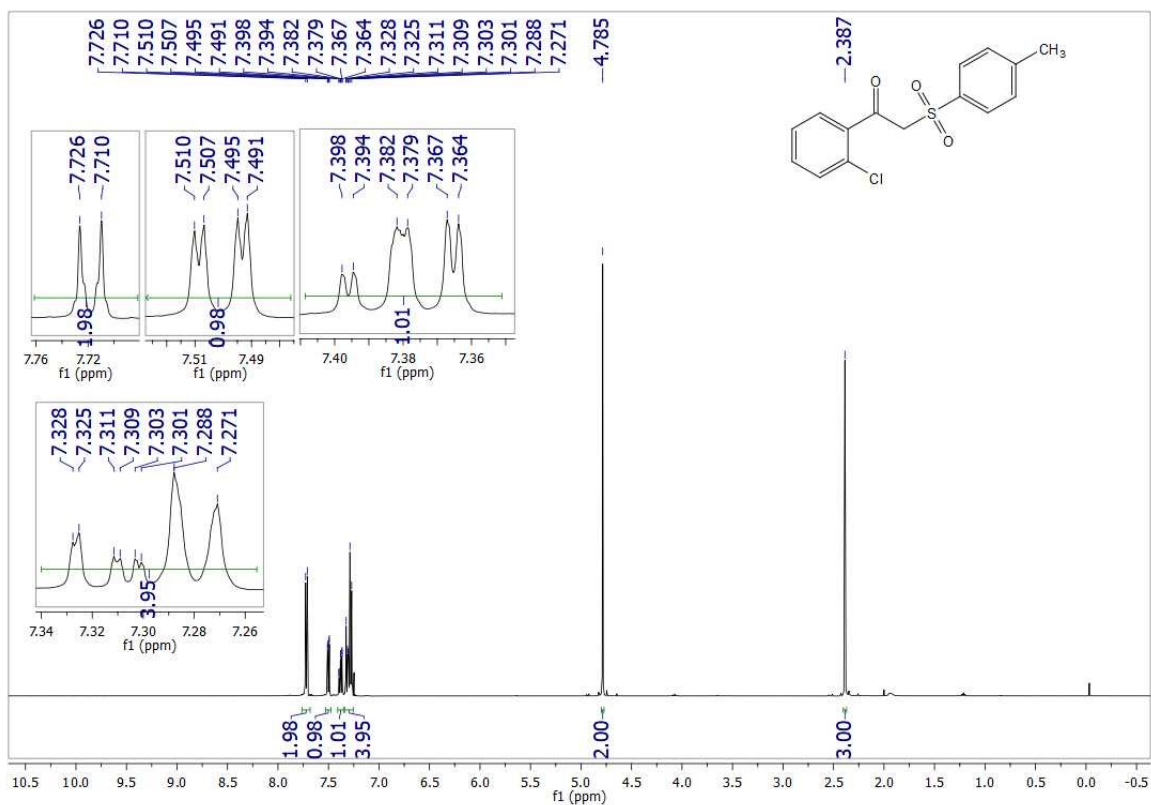

<sup>1</sup>H NMR (500 MHz, CDCl<sub>3</sub>) of compound 9.

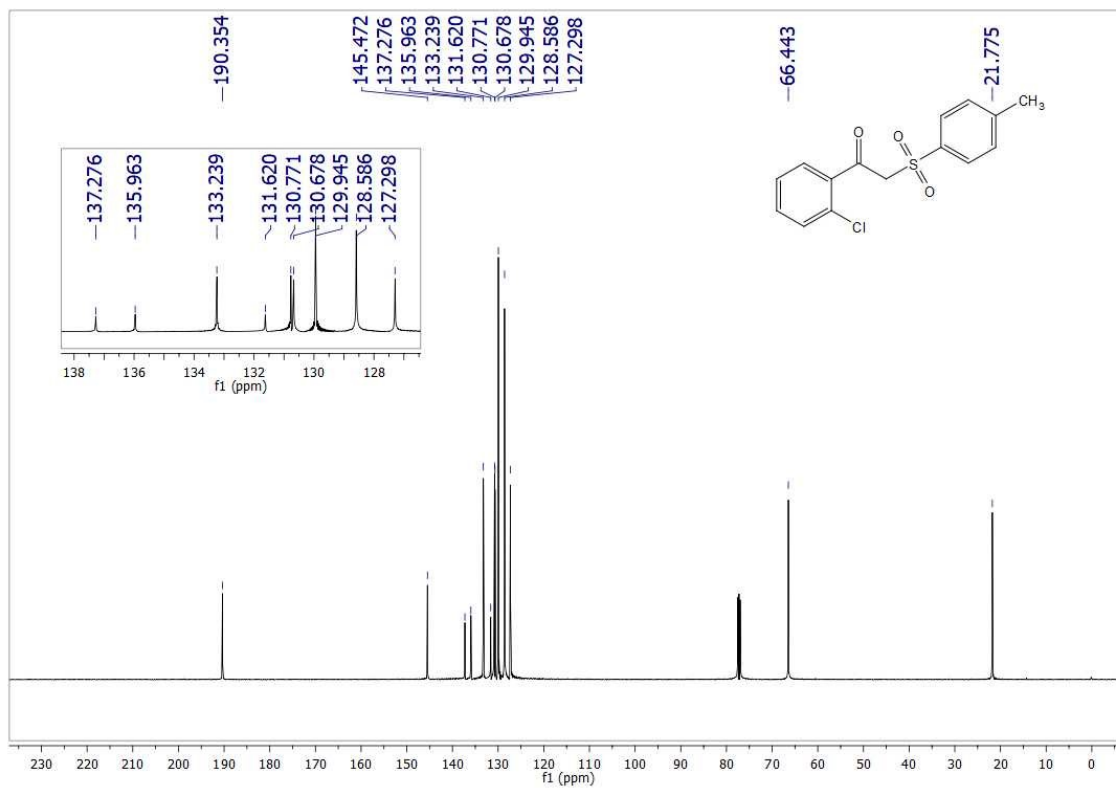

<sup>13</sup>C NMR (126 MHz, CDCl<sub>3</sub>) of compound 9.

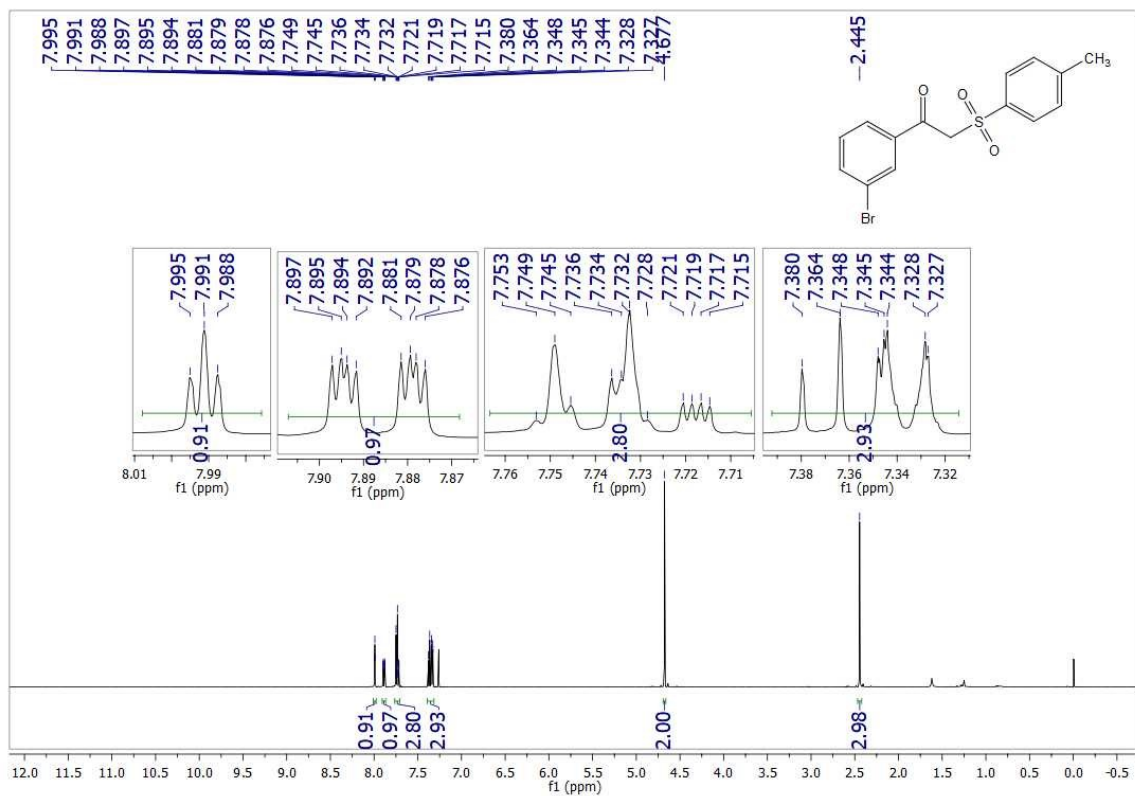

<sup>1</sup>H NMR (500 MHz, CDCl<sub>3</sub>) of compound **10**.

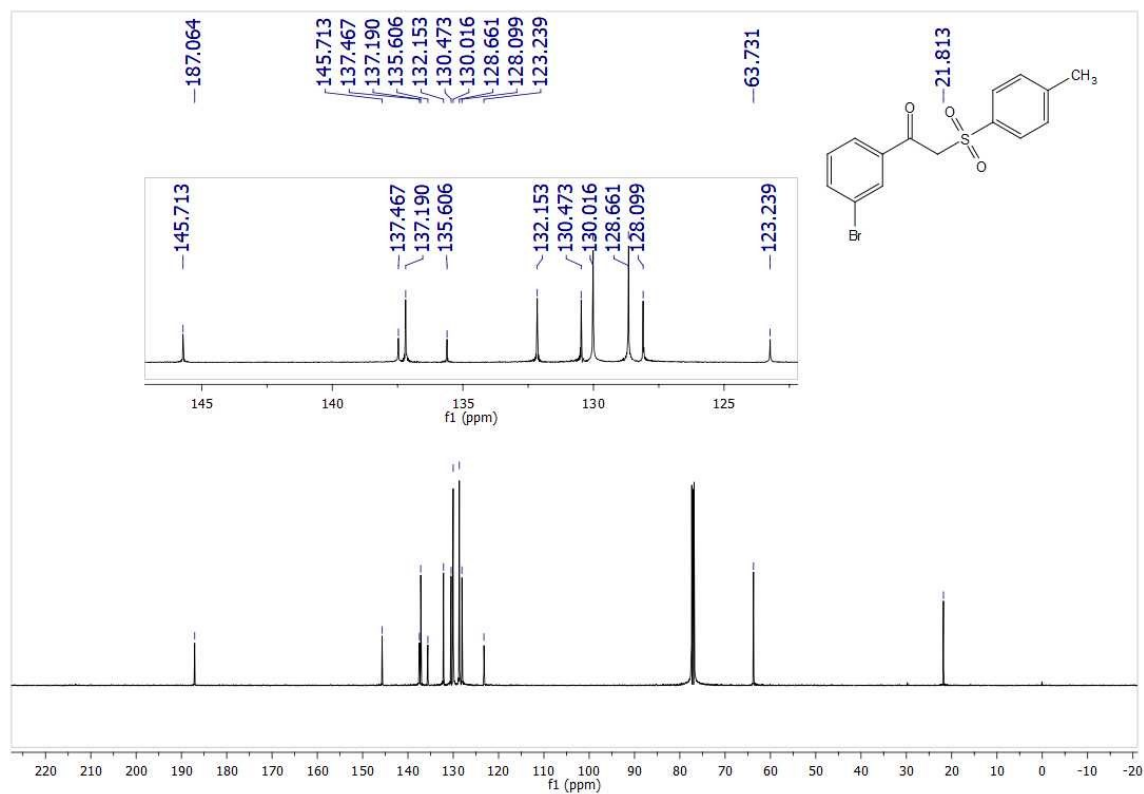

<sup>13</sup>C NMR (126 MHz, CDCl<sub>3</sub>) of compound **10**.

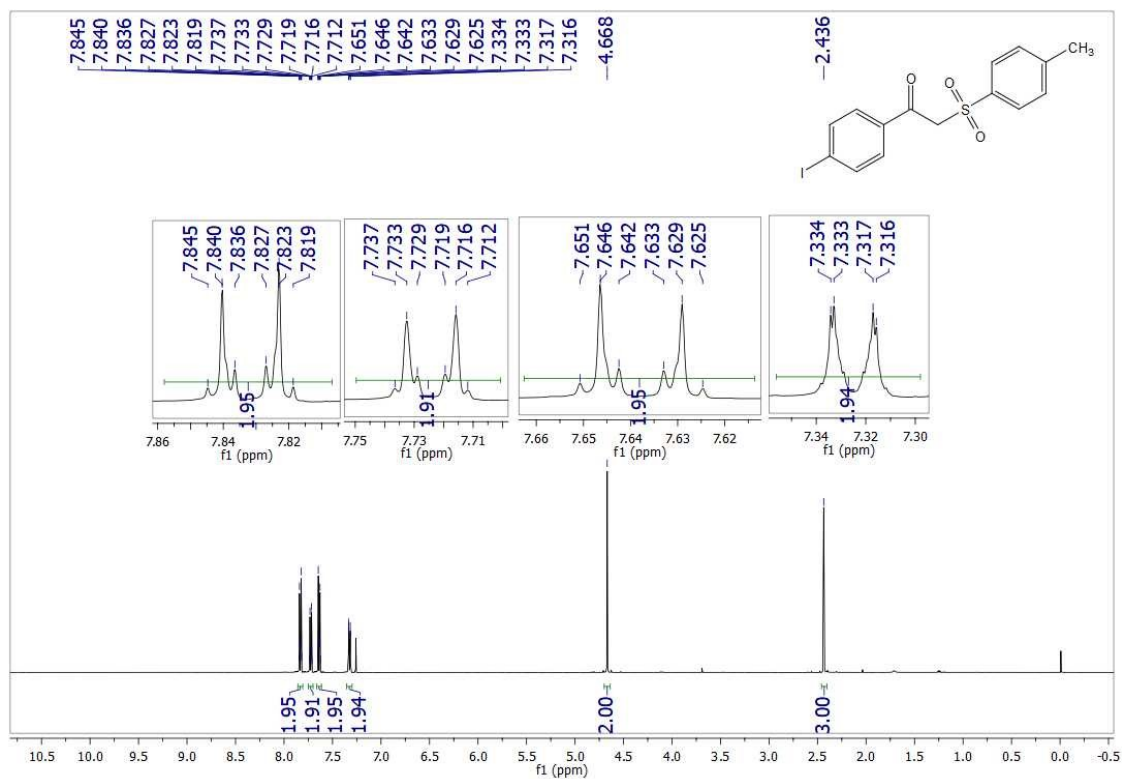

<sup>1</sup>H NMR (500 MHz, CDCl<sub>3</sub>) of compound **11**.

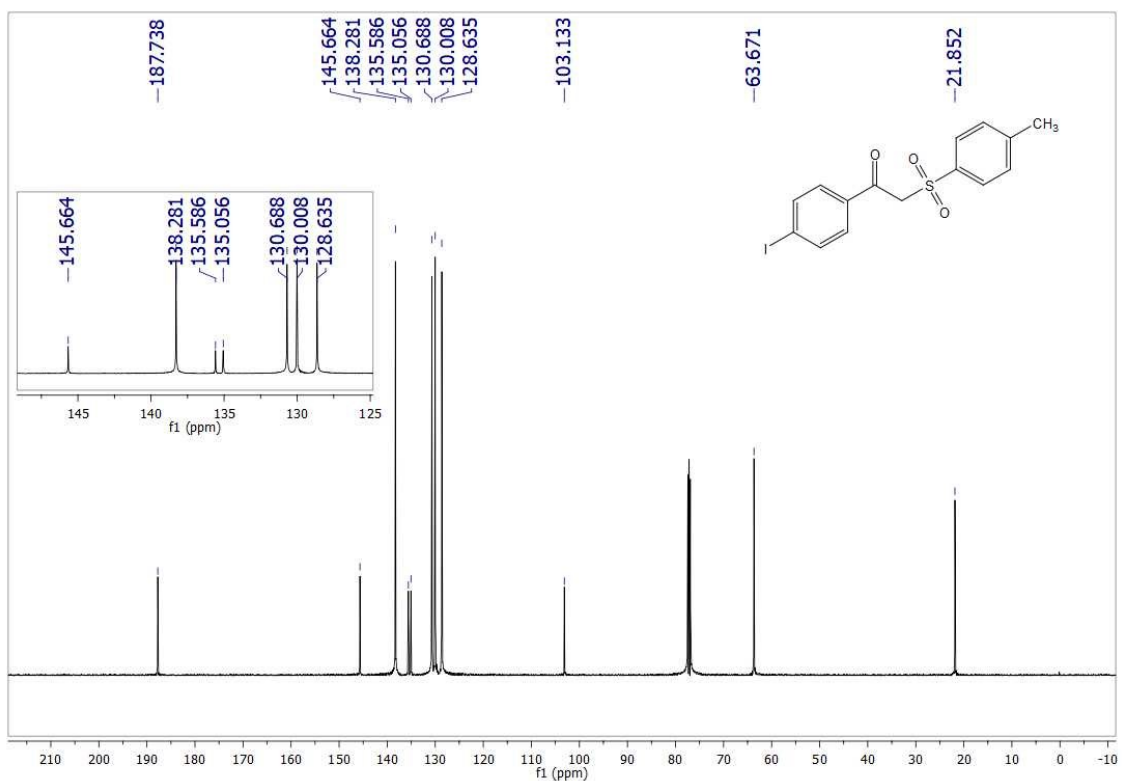

<sup>13</sup>C NMR (126 MHz, CDCl<sub>3</sub>) of compound **11**.



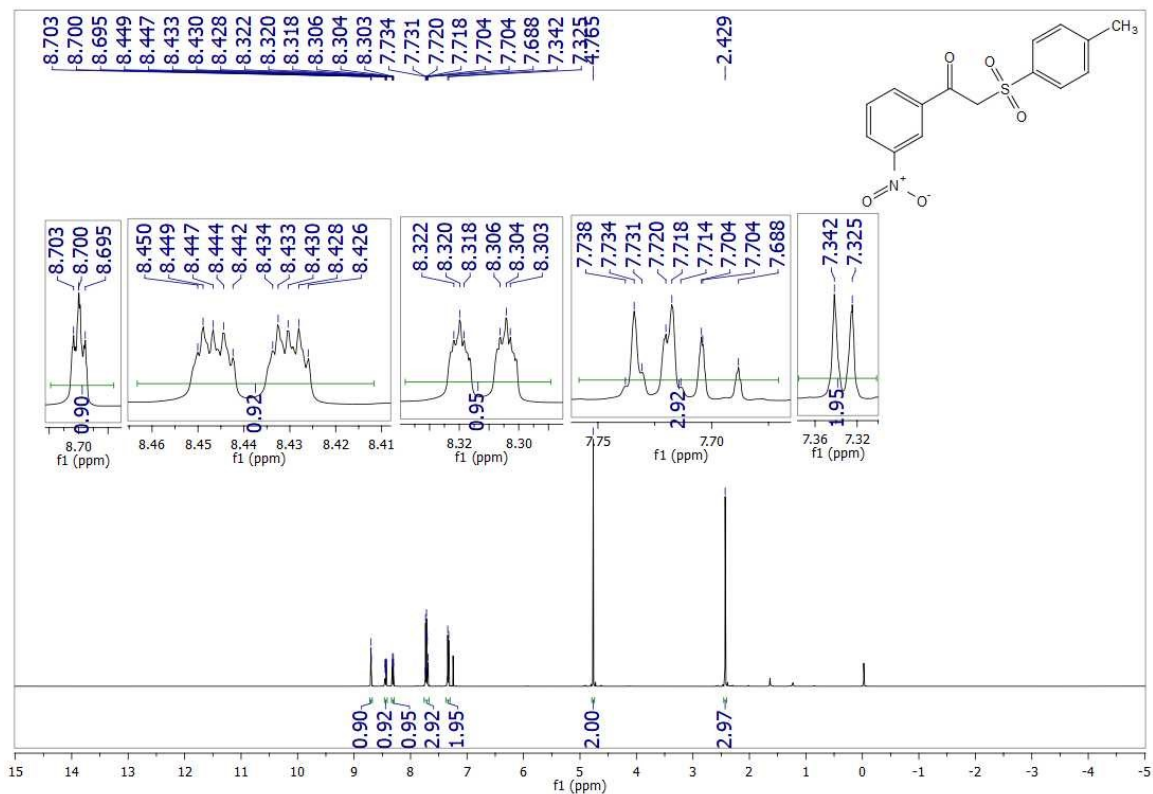

<sup>1</sup>H NMR (500 MHz, CDCl<sub>3</sub>) of compound **12**.

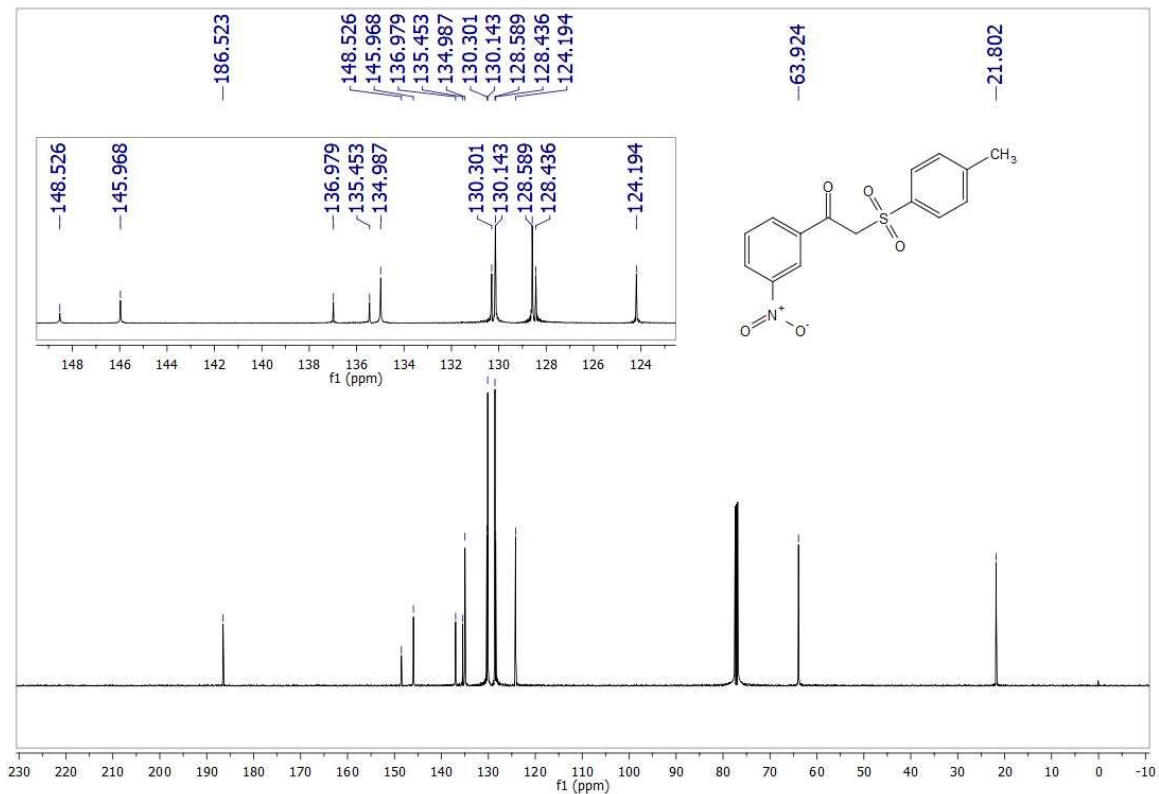

<sup>13</sup>C NMR (126 MHz, CDCl<sub>3</sub>) of compound **12**.

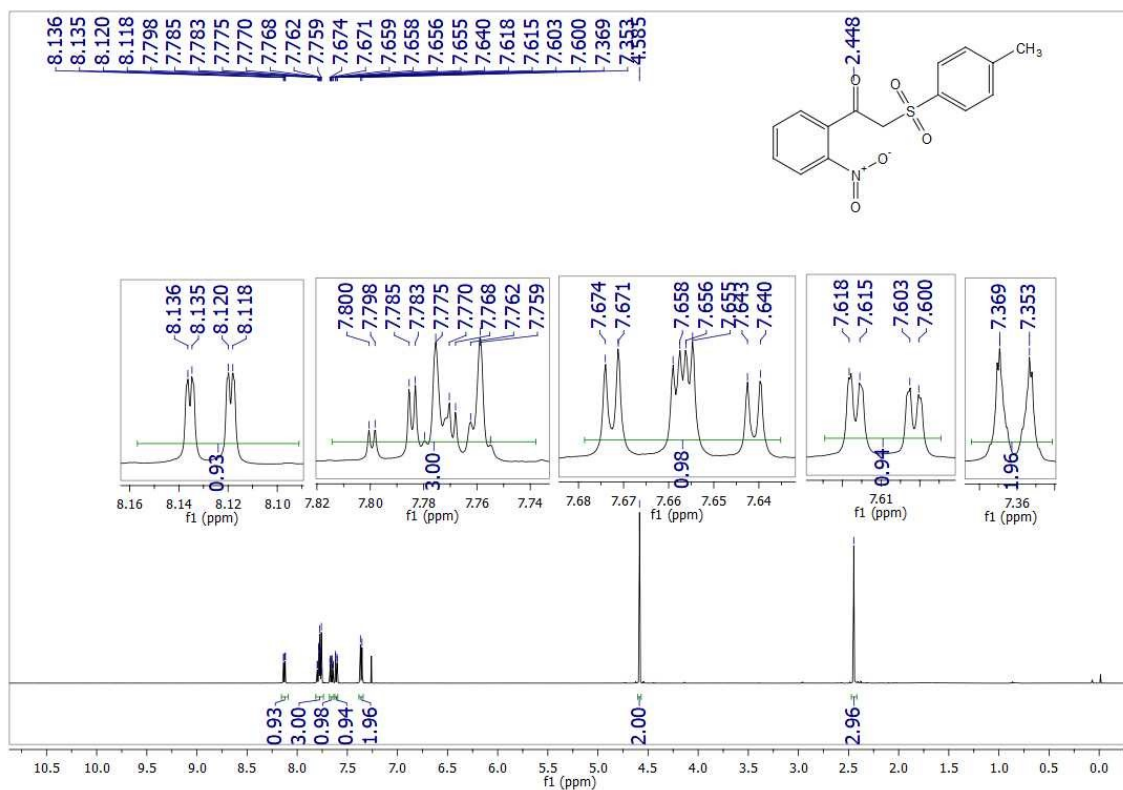

<sup>1</sup>H NMR (500 MHz, CDCl<sub>3</sub>) of compound 13.

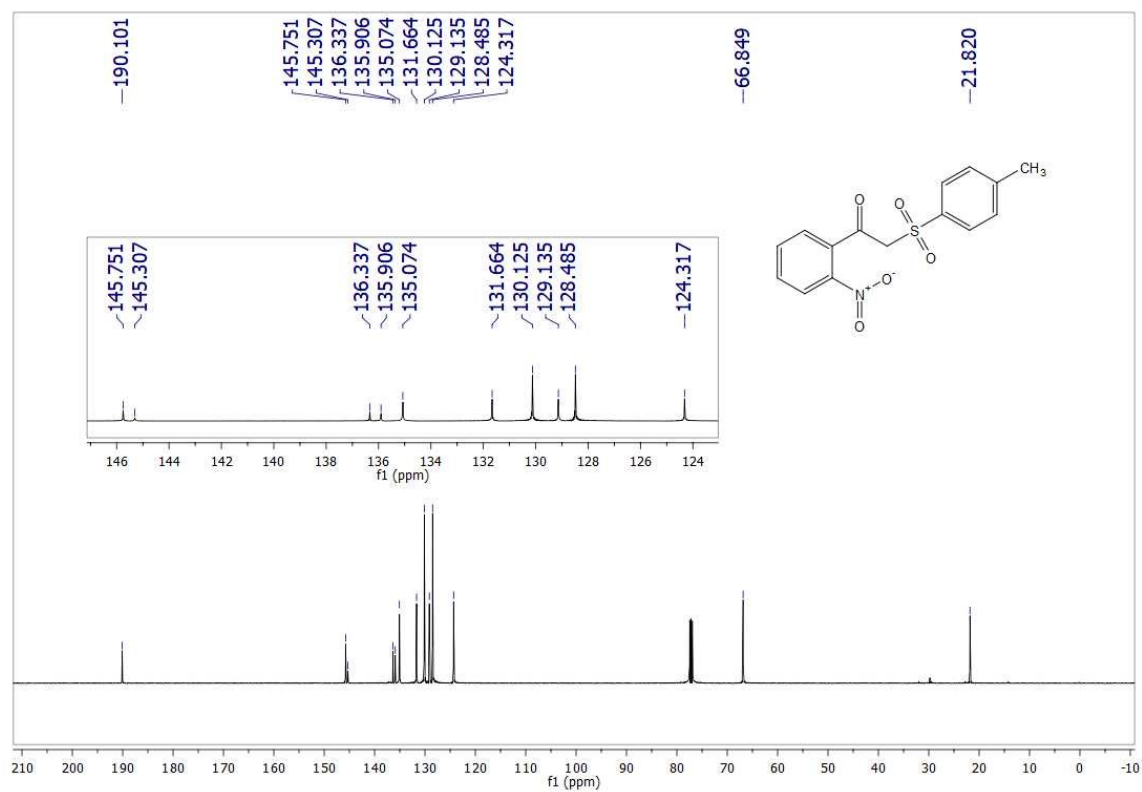

<sup>13</sup>C NMR (126 MHz, CDCl<sub>3</sub>) of compound 13.



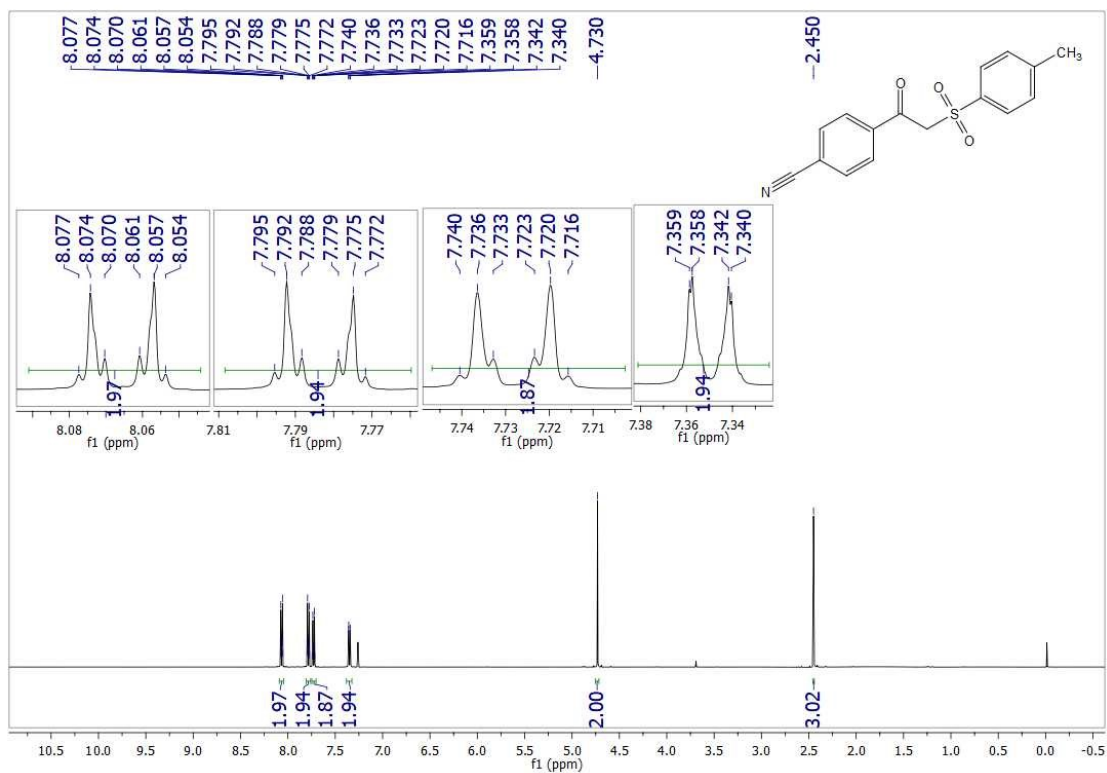

<sup>1</sup>H NMR (500 MHz, CDCl<sub>3</sub>) of compound 14.

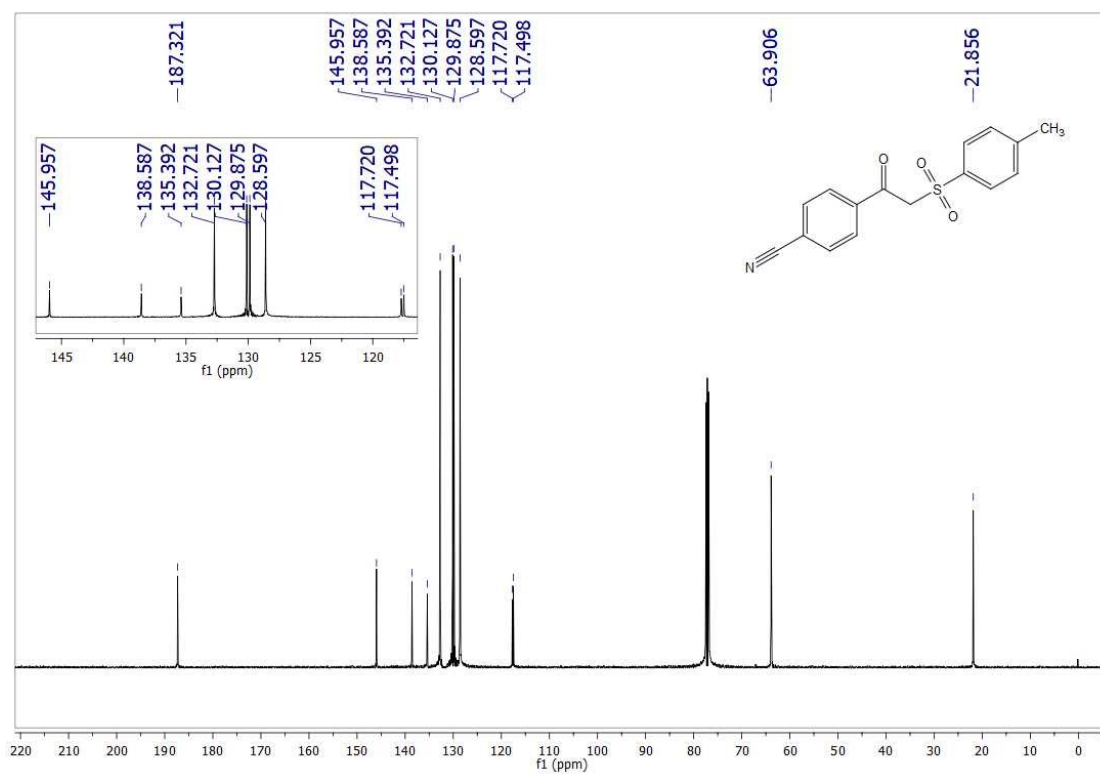

<sup>13</sup>C NMR (126 MHz, CDCl<sub>3</sub>) of compound 14.

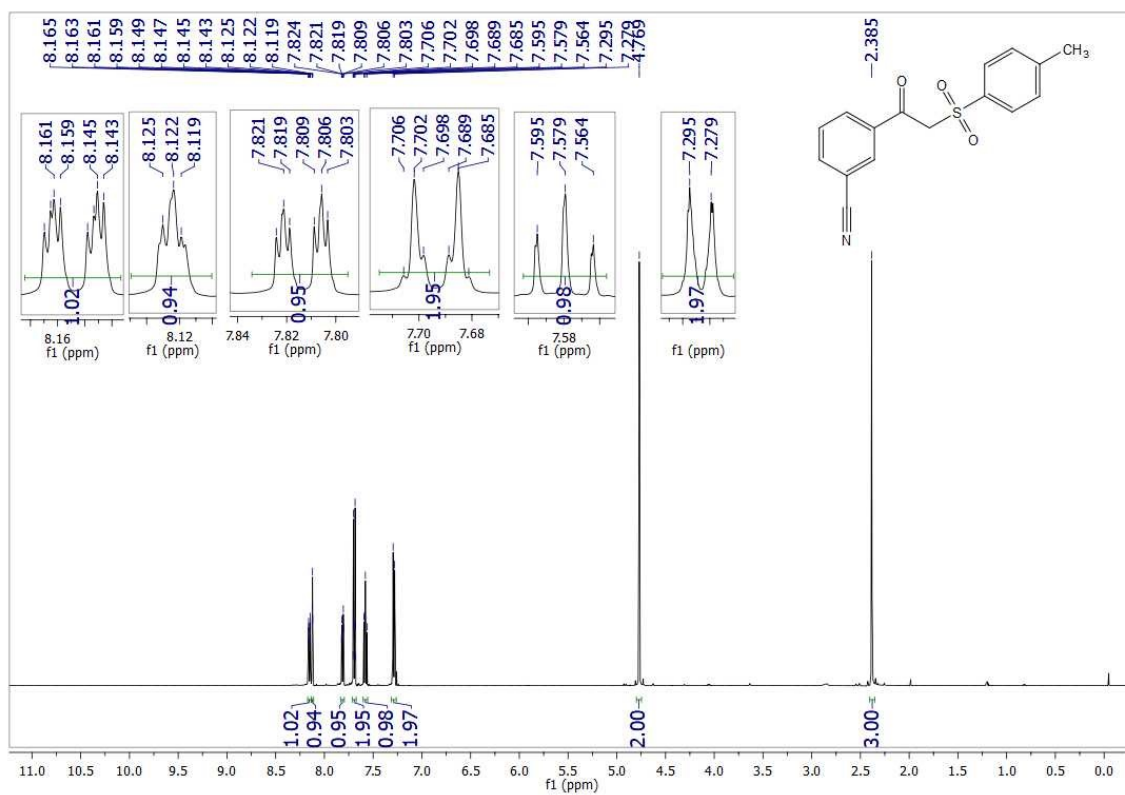

<sup>1</sup>H NMR (500 MHz, CDCl<sub>3</sub>) of compound **15**.

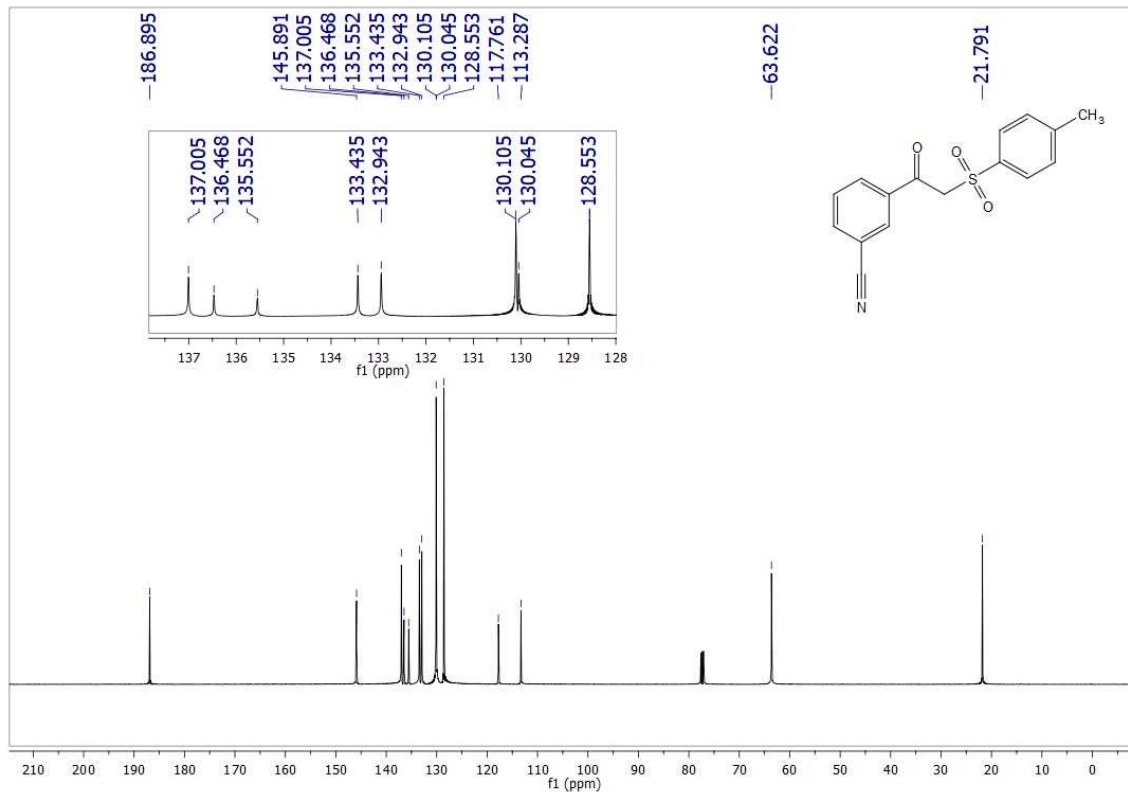

<sup>13</sup>C NMR (126 MHz, CDCl<sub>3</sub>) of compound **15**.

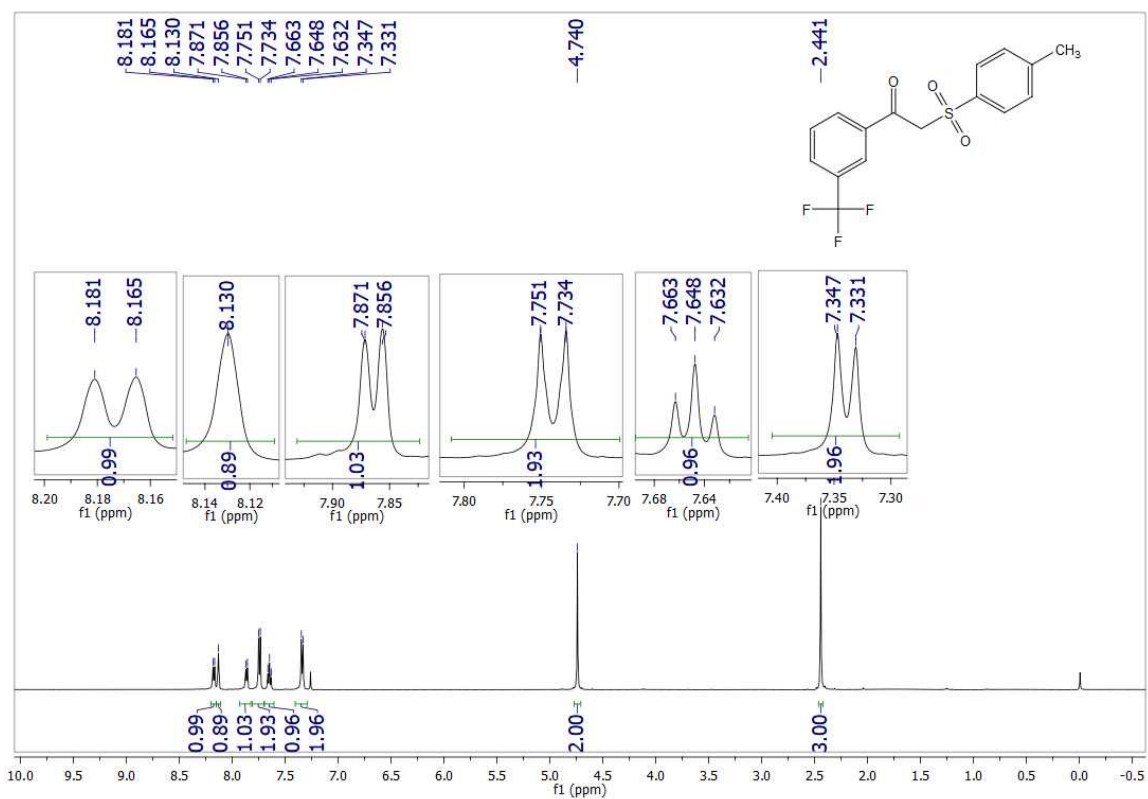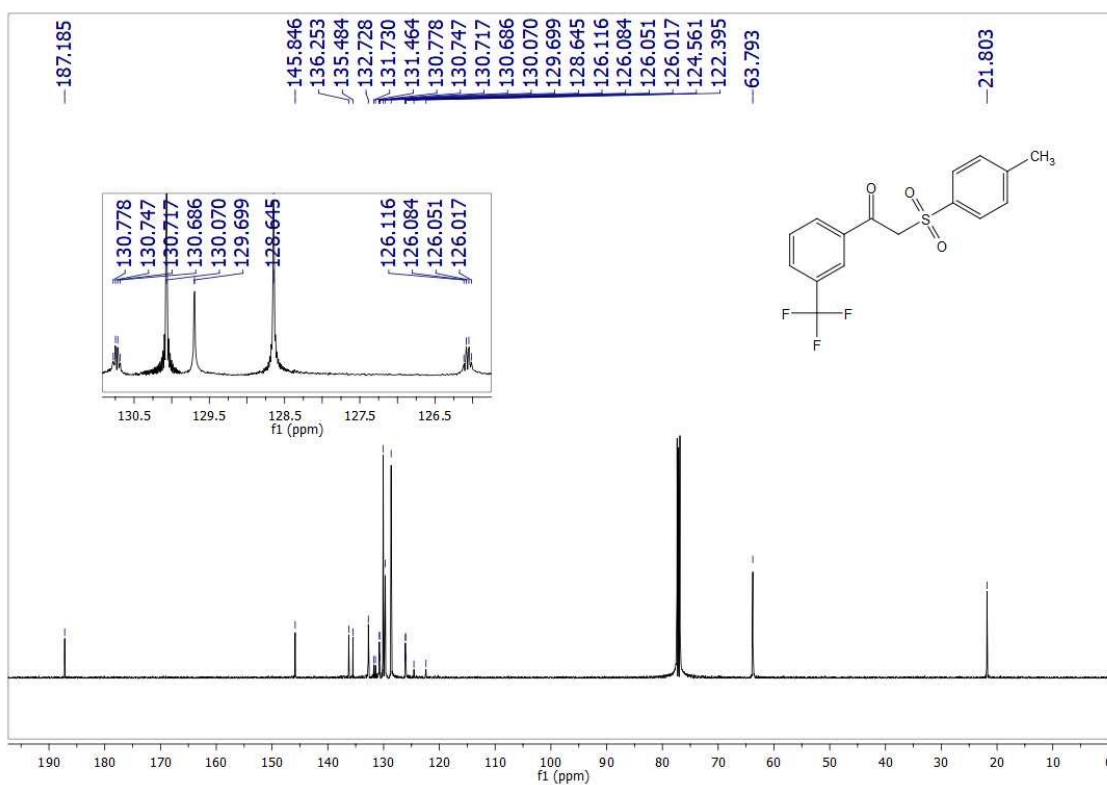

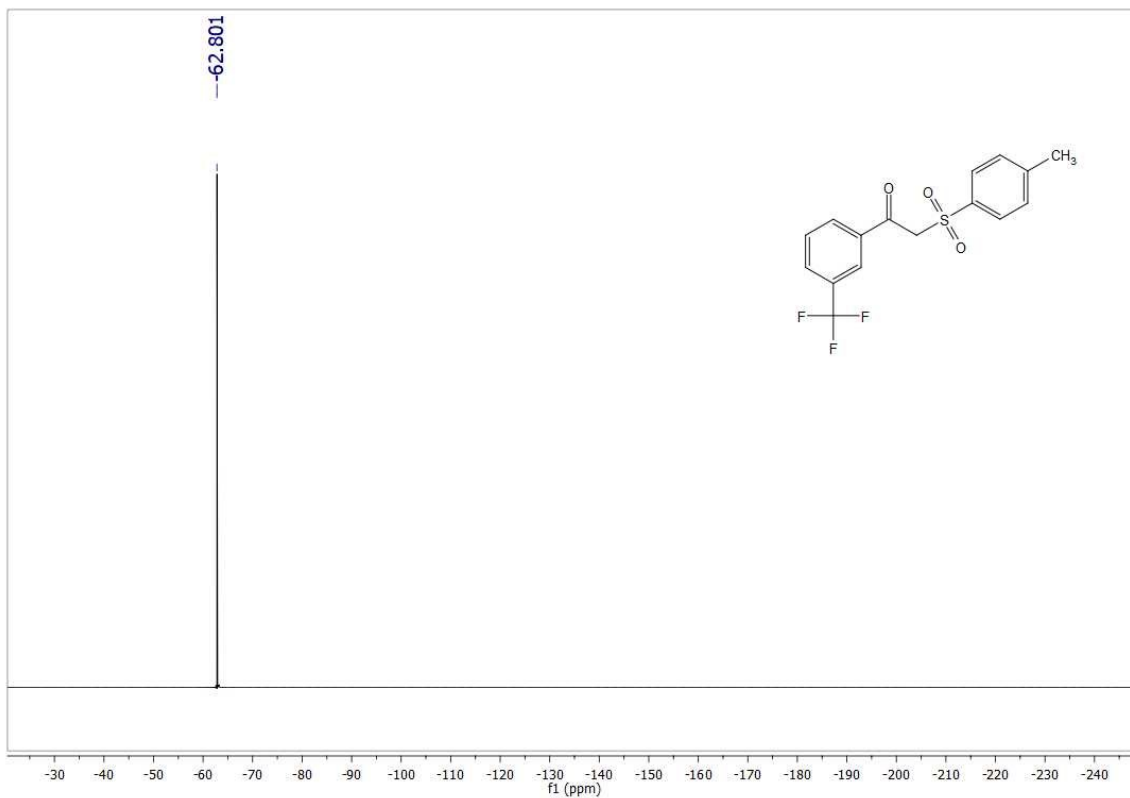

$^{19}\text{F}$  NMR (472 MHz,  $\text{CDCl}_3$ ) of compound 16.

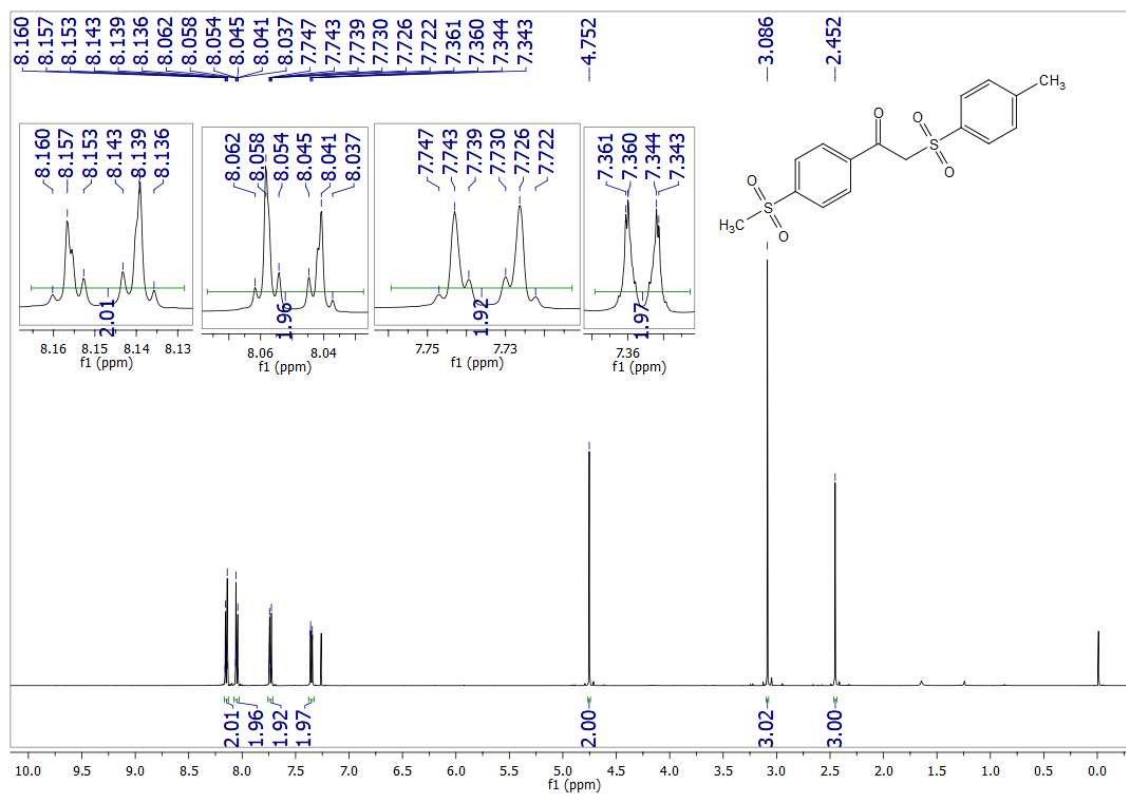

$^1\text{H}$  NMR (500 MHz,  $\text{CDCl}_3$ ) of compound 17.

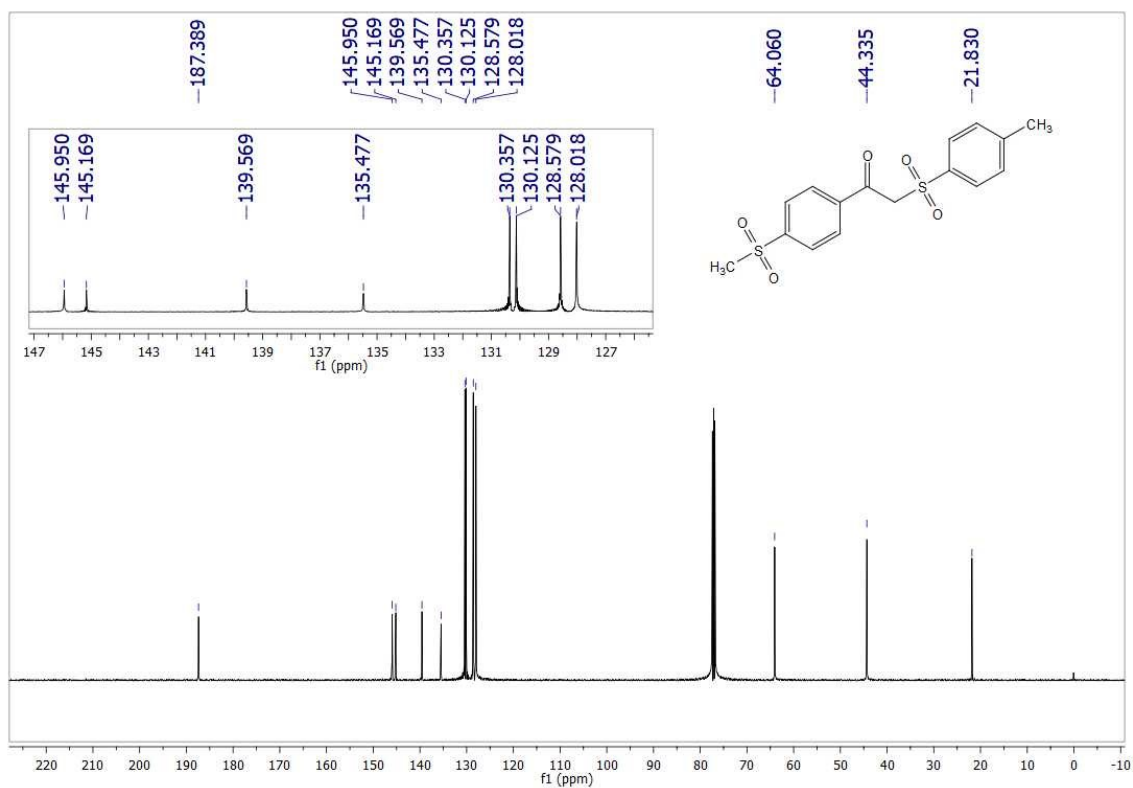

<sup>13</sup>C NMR (126 MHz, CDCl<sub>3</sub>) of compound 17.

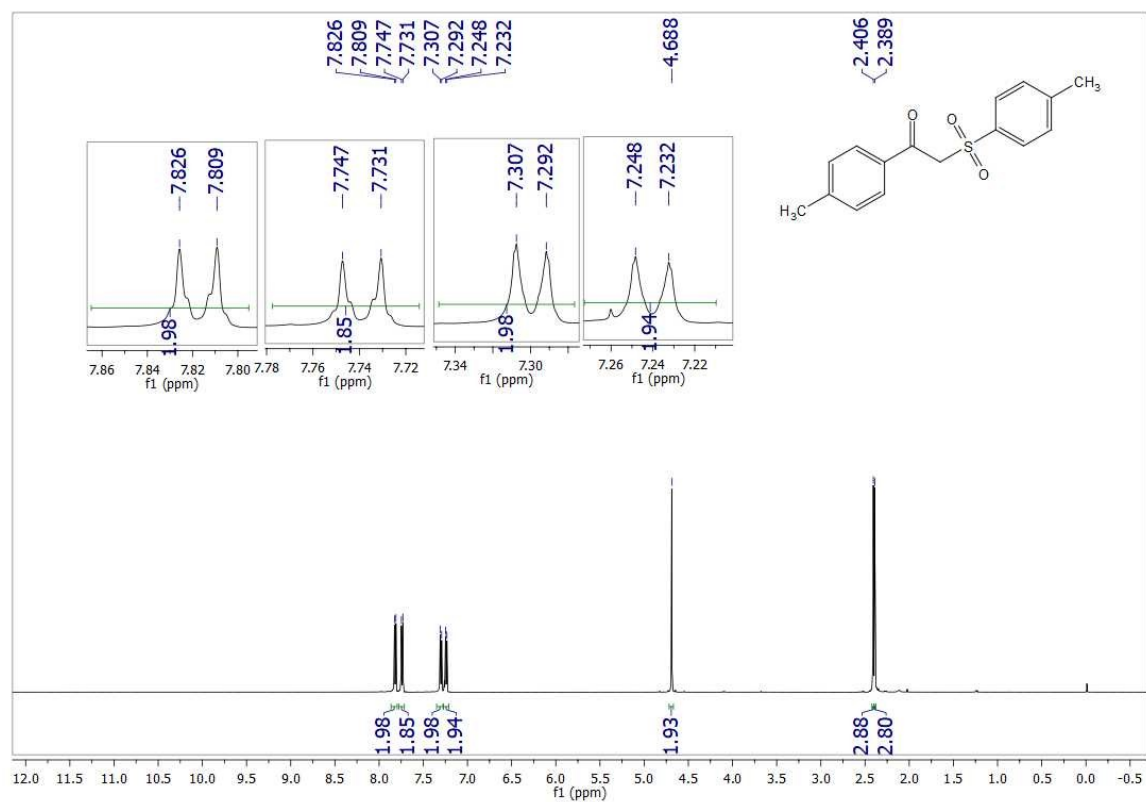

<sup>1</sup>H NMR (500 MHz, CDCl<sub>3</sub>) of compound 18.

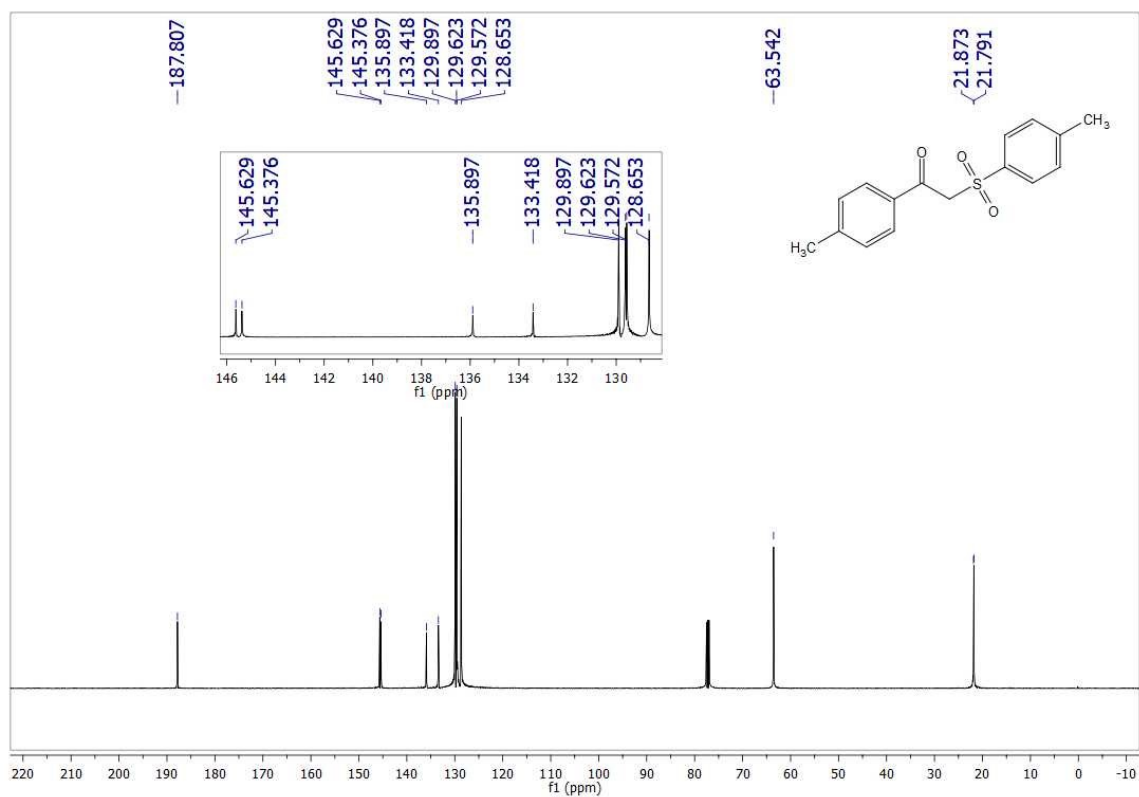

<sup>13</sup>C NMR (126 MHz, CDCl<sub>3</sub>) of compound **18**.

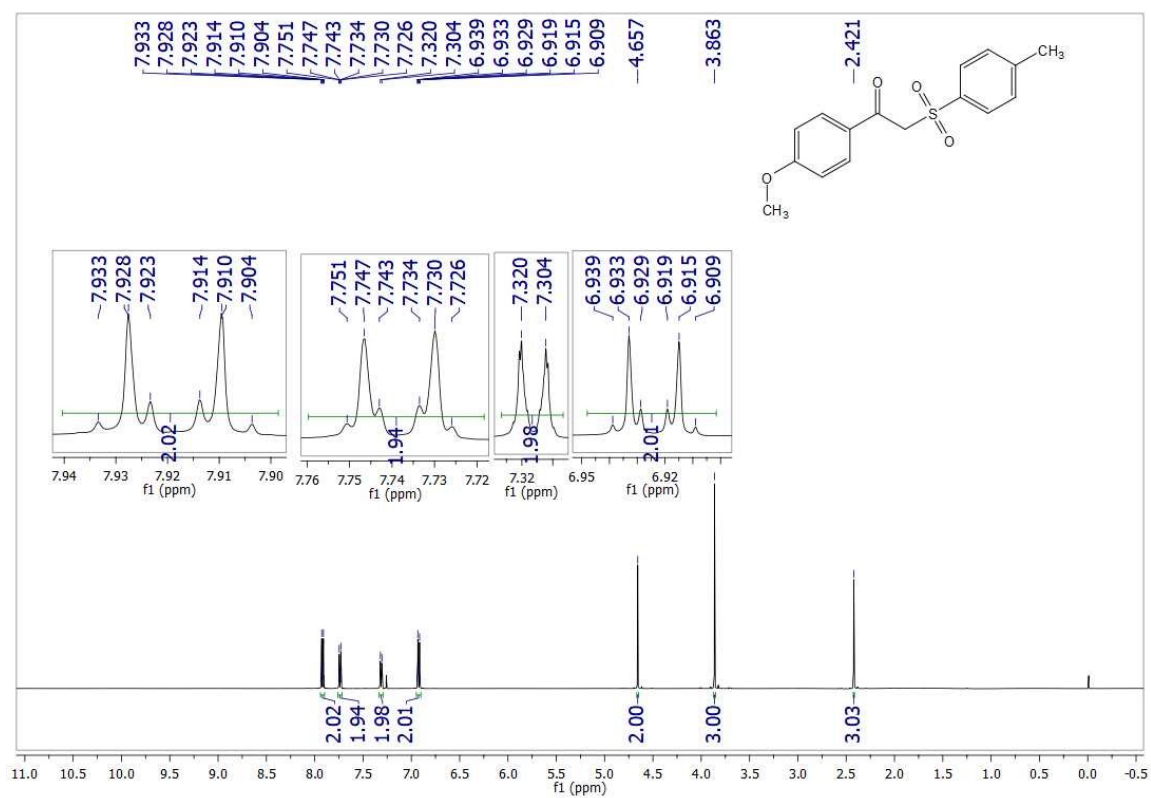

<sup>1</sup>H NMR (500 MHz, CDCl<sub>3</sub>) of compound **19**.



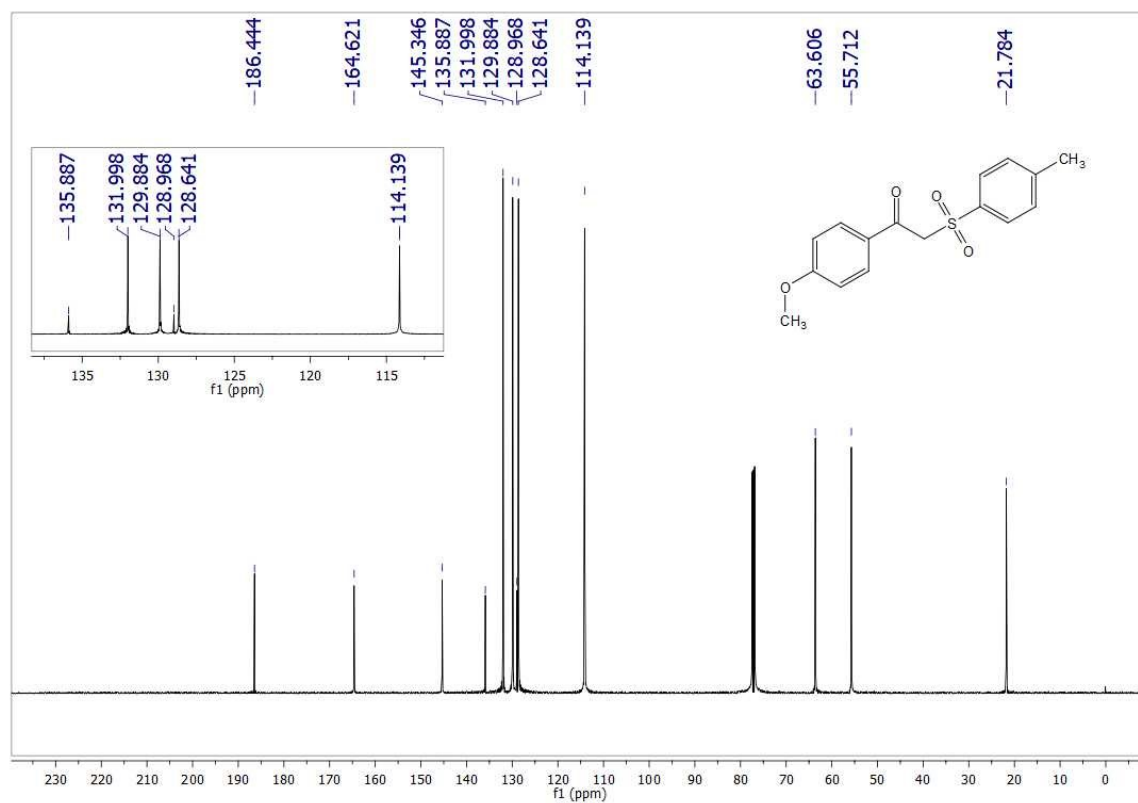

<sup>13</sup>C NMR (126 MHz, CDCl<sub>3</sub>) of compound 19.

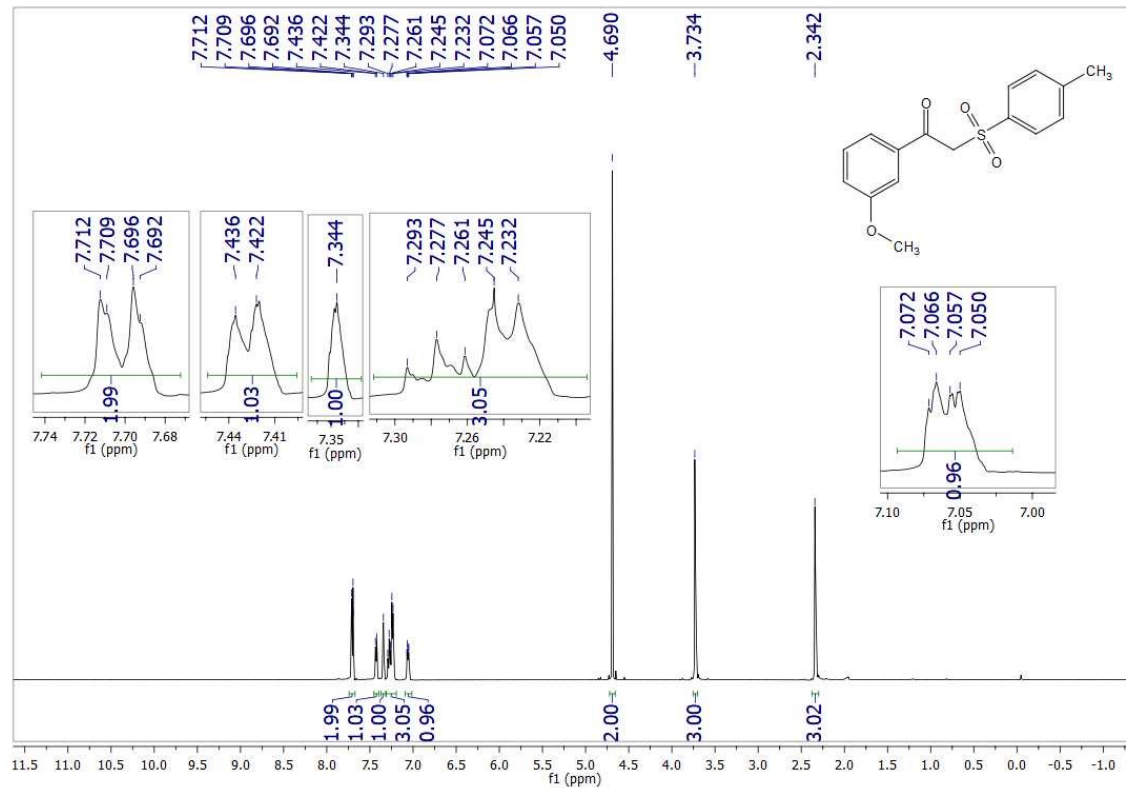

<sup>1</sup>H NMR (500 MHz, CDCl<sub>3</sub>) of compound 20.

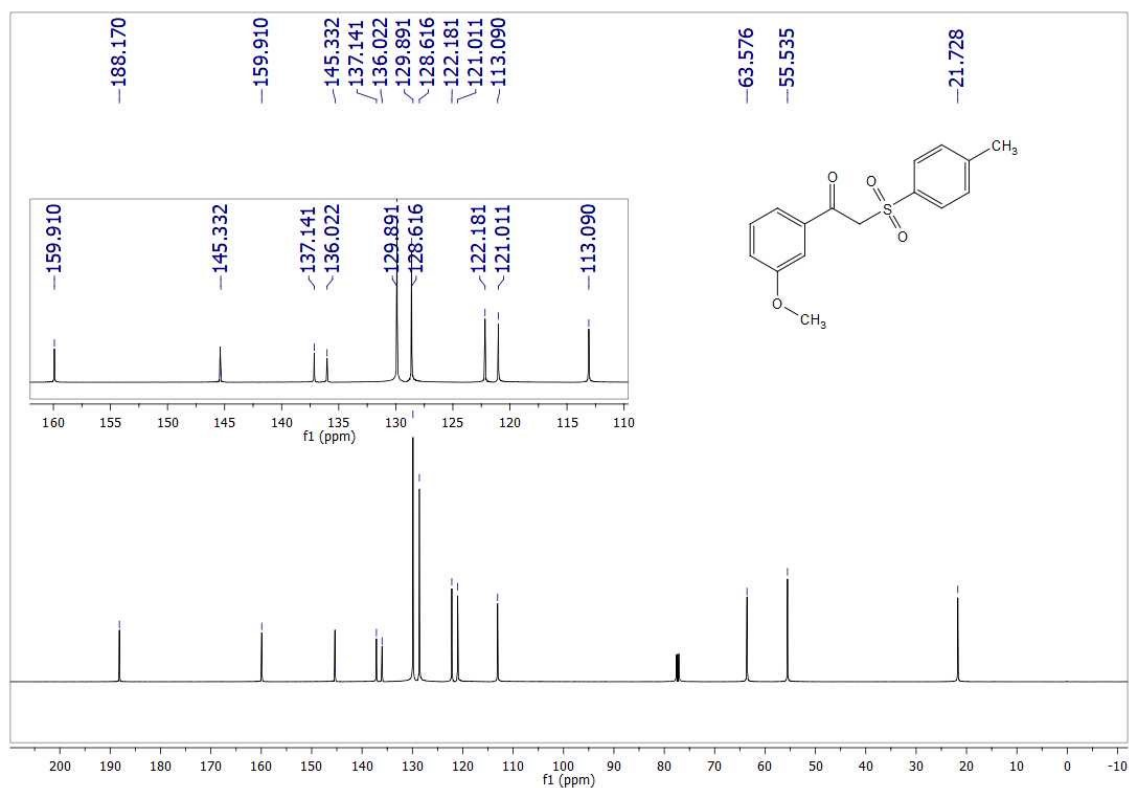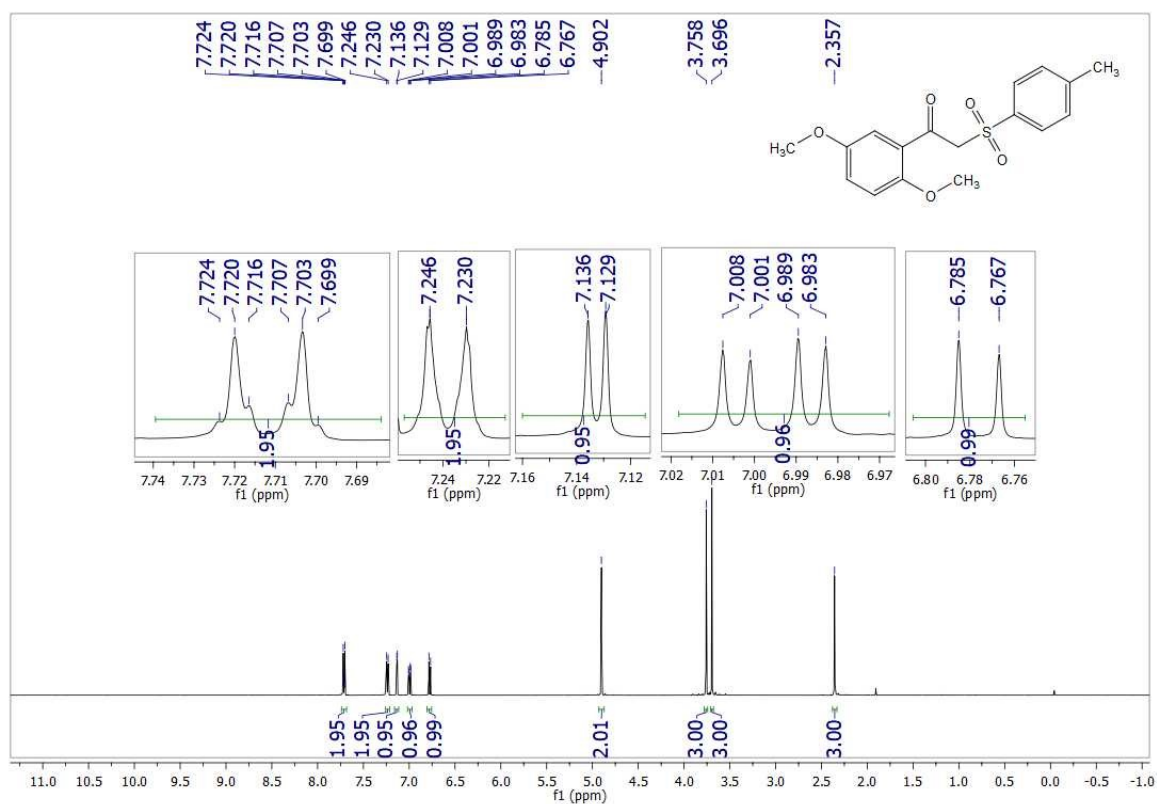



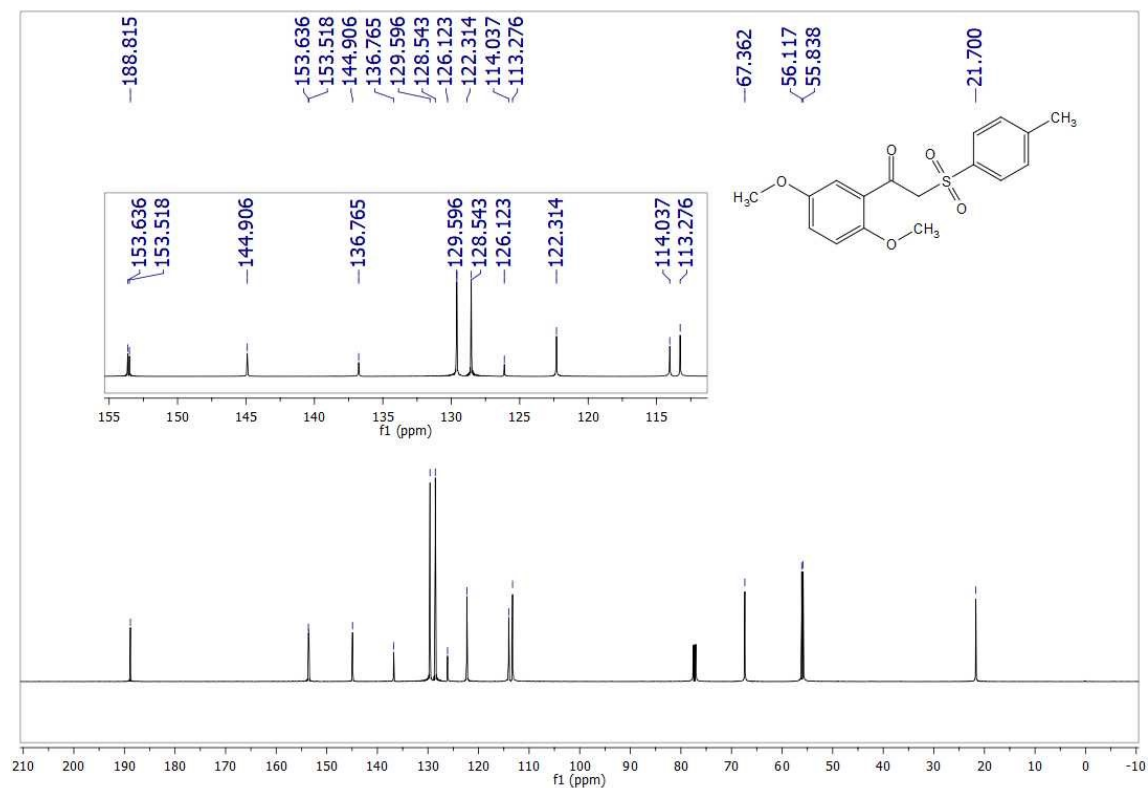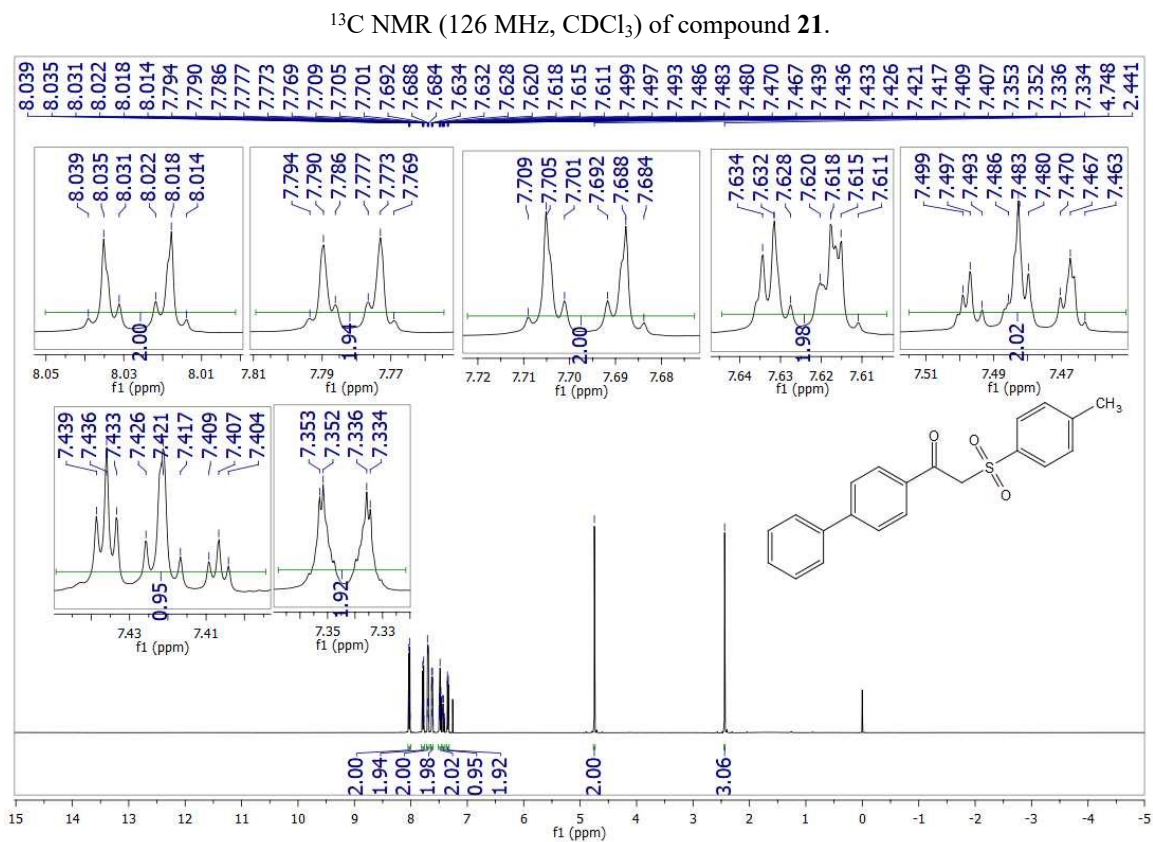

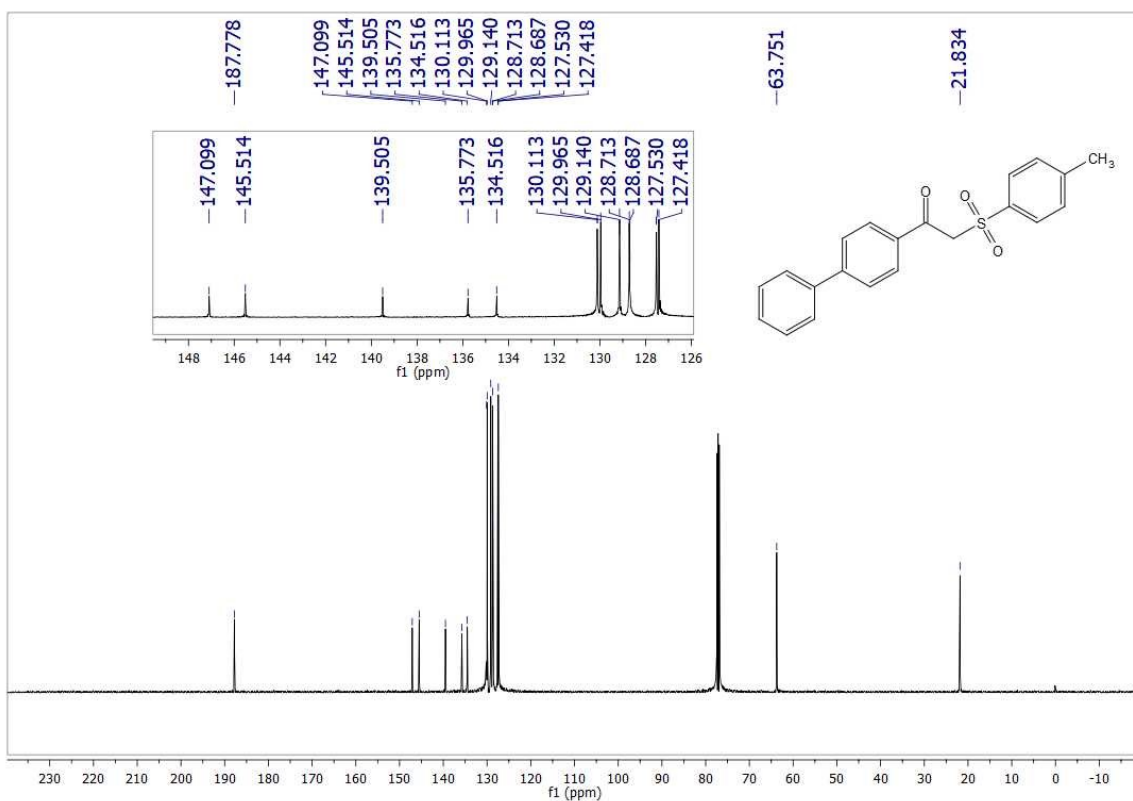

<sup>13</sup>C NMR (126 MHz, CDCl<sub>3</sub>) of compound 22.

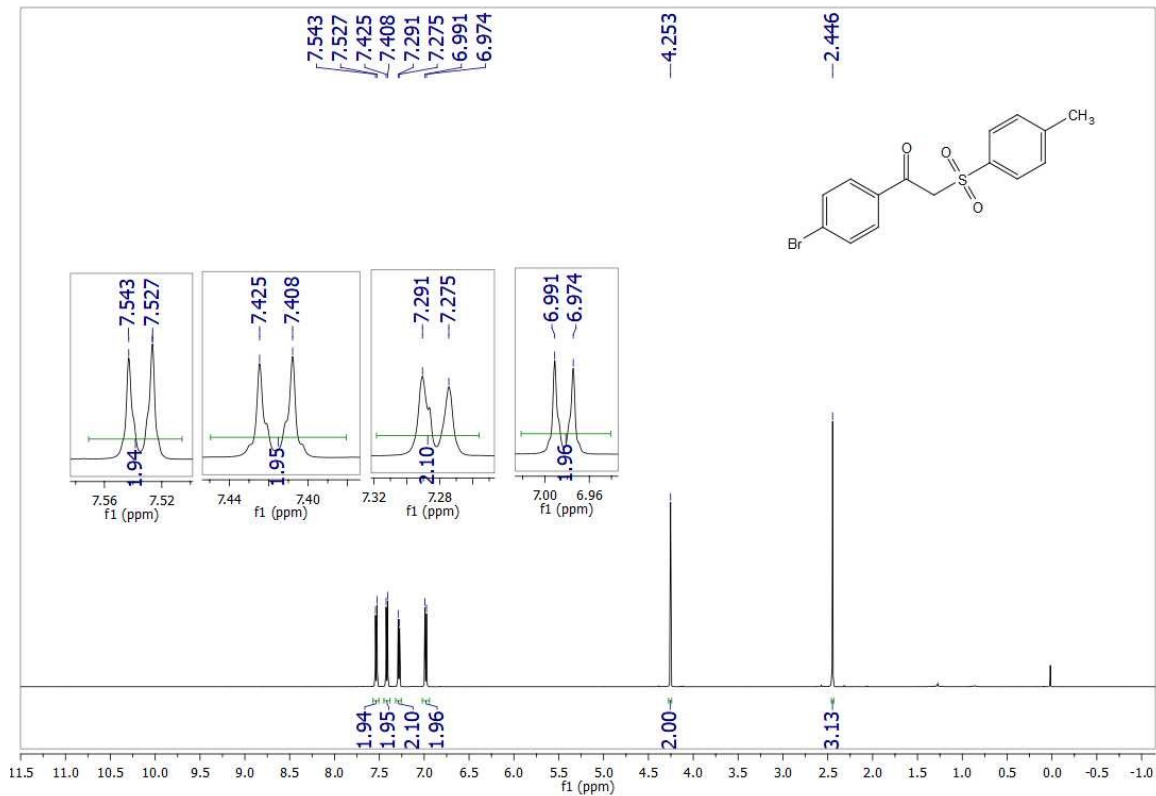

<sup>1</sup>H NMR (500 MHz, CDCl<sub>3</sub>) of compound 23.

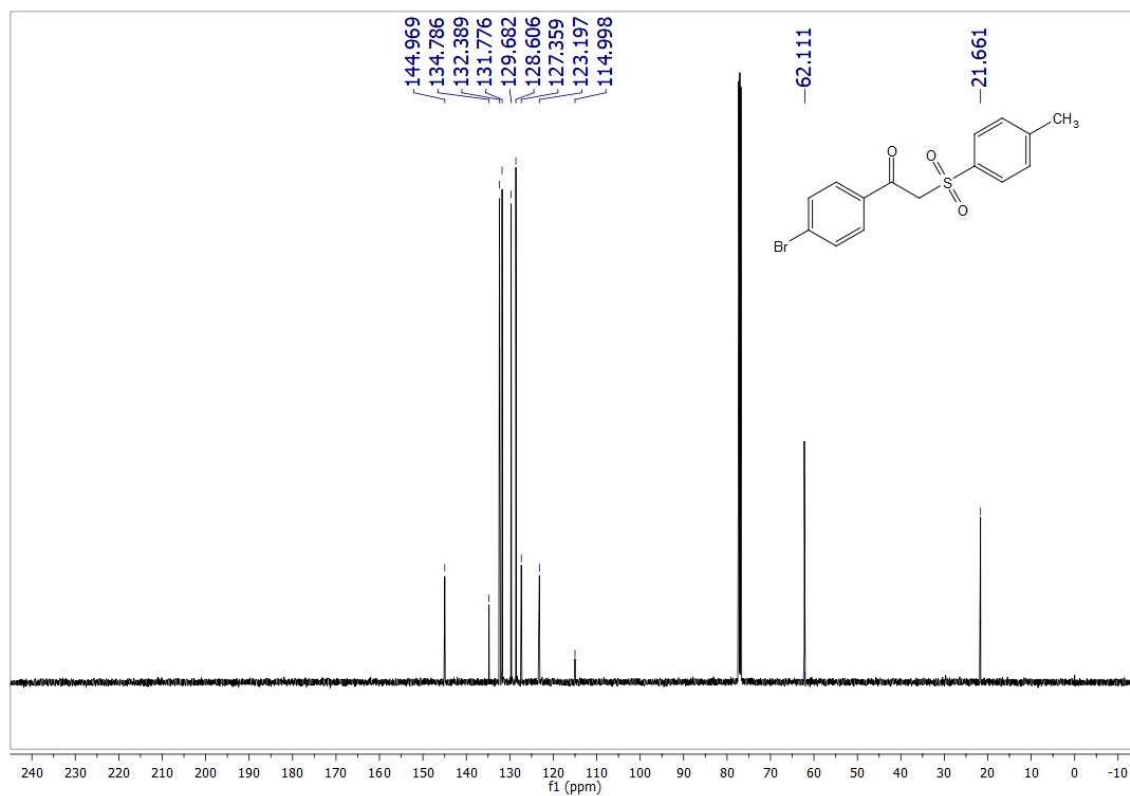

<sup>13</sup>C NMR (126 MHz, CDCl<sub>3</sub>) of compound **23**.

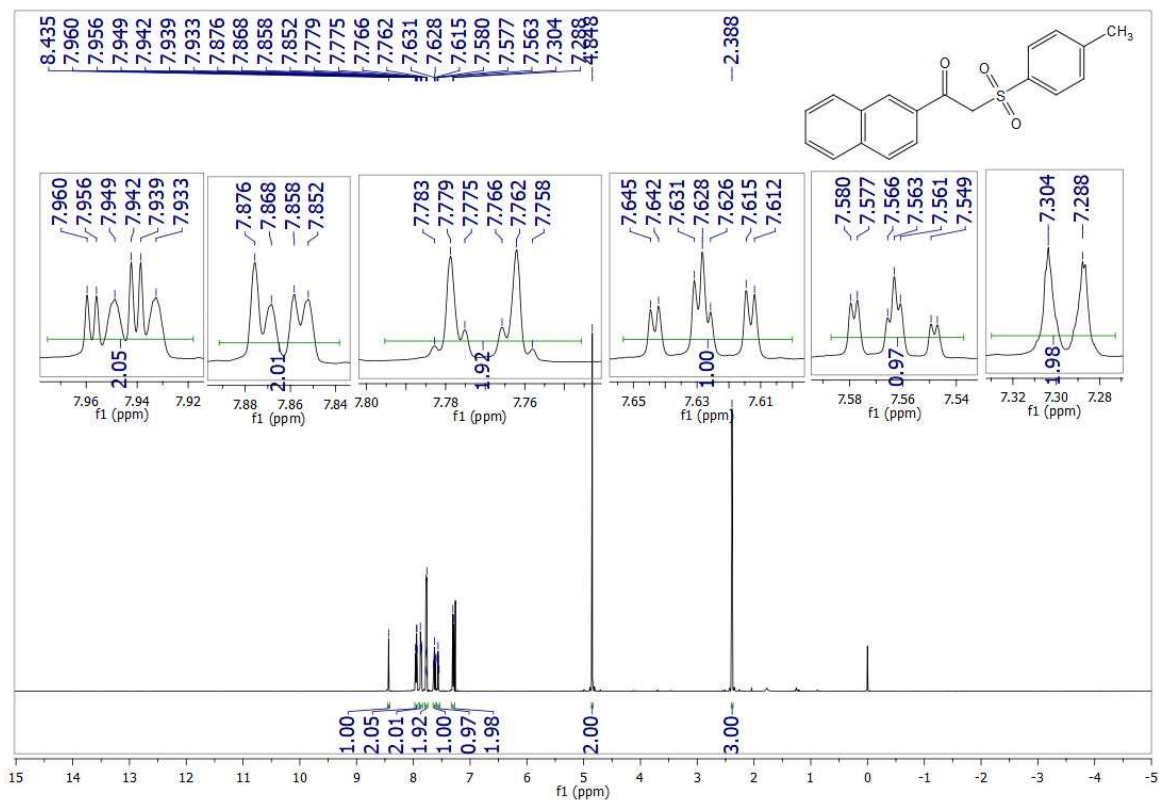

<sup>1</sup>H NMR (500 MHz, CDCl<sub>3</sub>) of compound **24**.

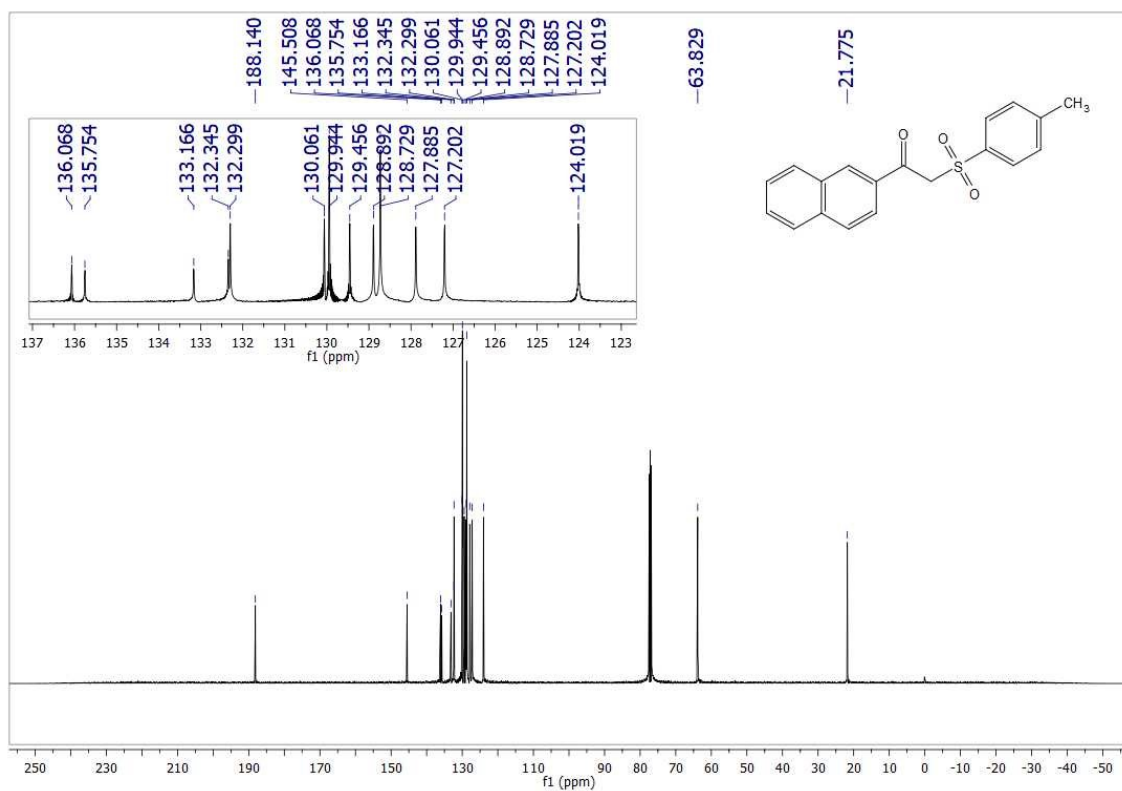

<sup>13</sup>C NMR (126 MHz, CDCl<sub>3</sub>) of compound **24**.

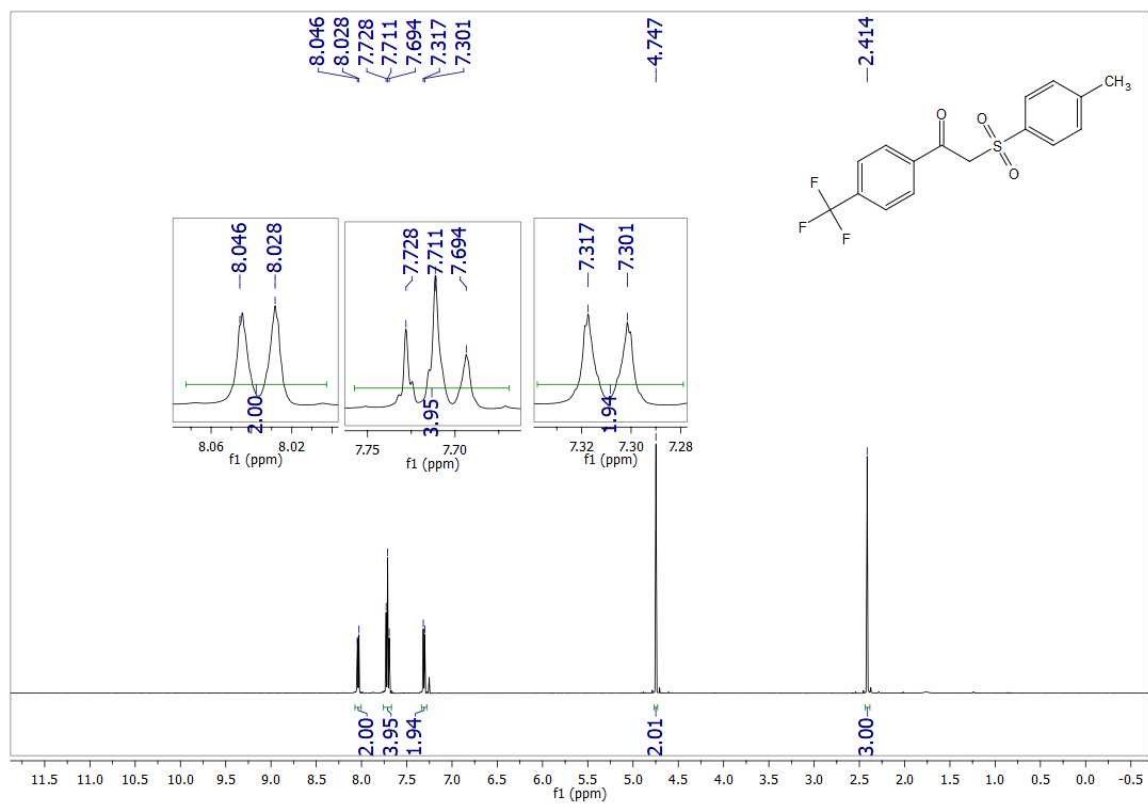

<sup>1</sup>H NMR (500 MHz, CDCl<sub>3</sub>) of compound **25**.

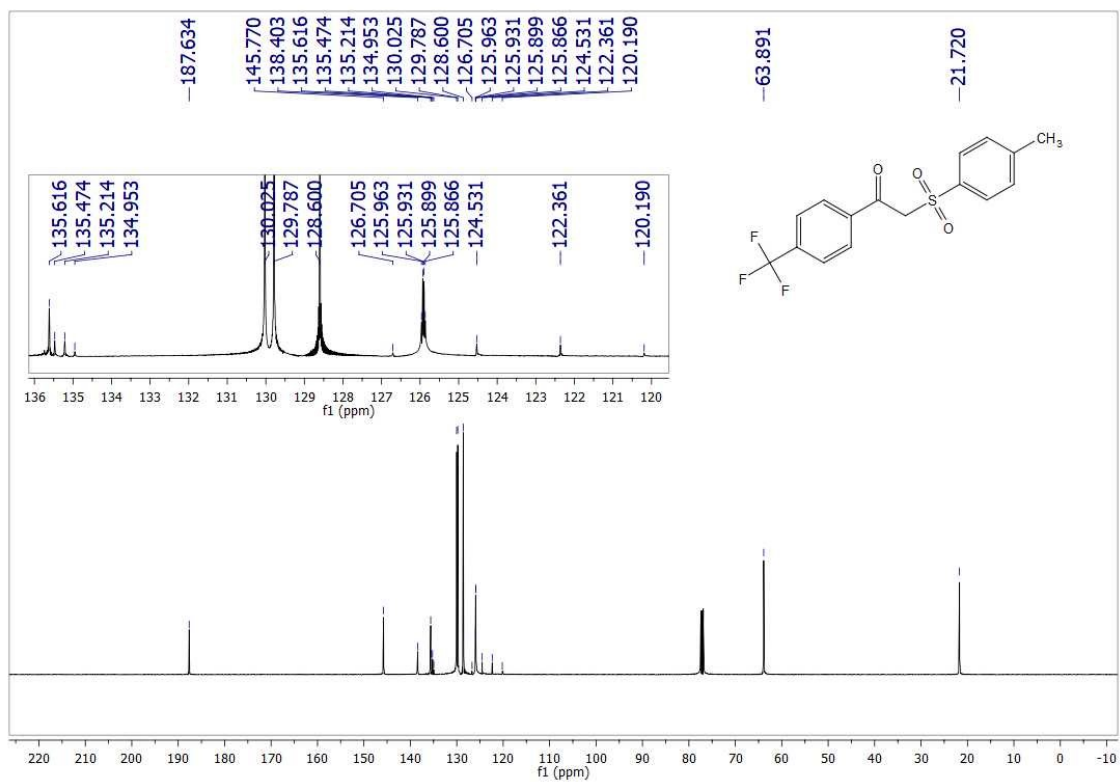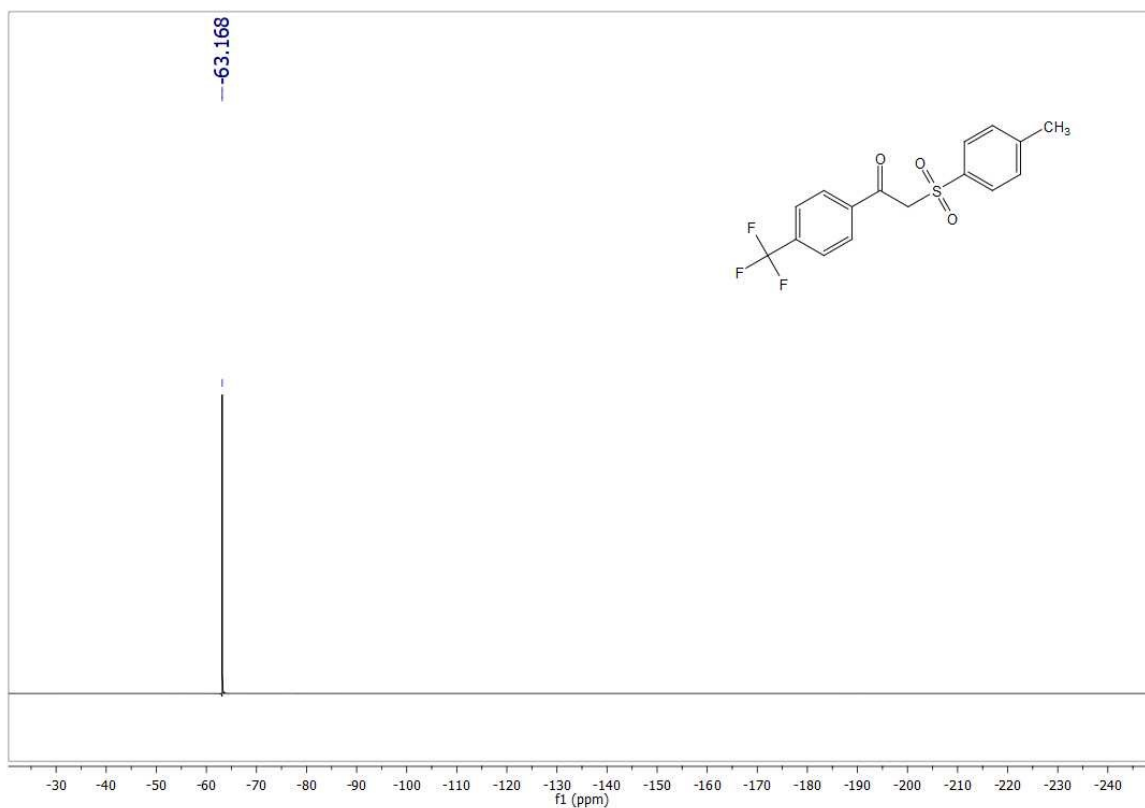

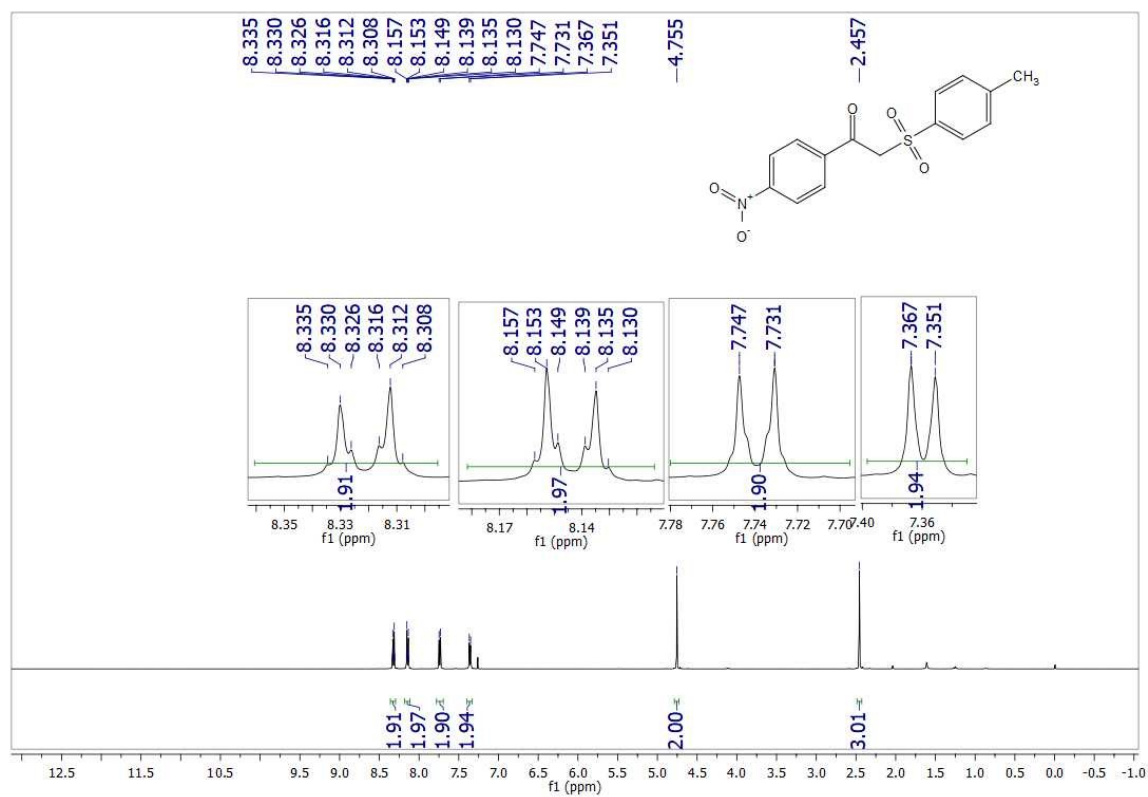

<sup>1</sup>H NMR (500 MHz, CDCl<sub>3</sub>) of compound 26.

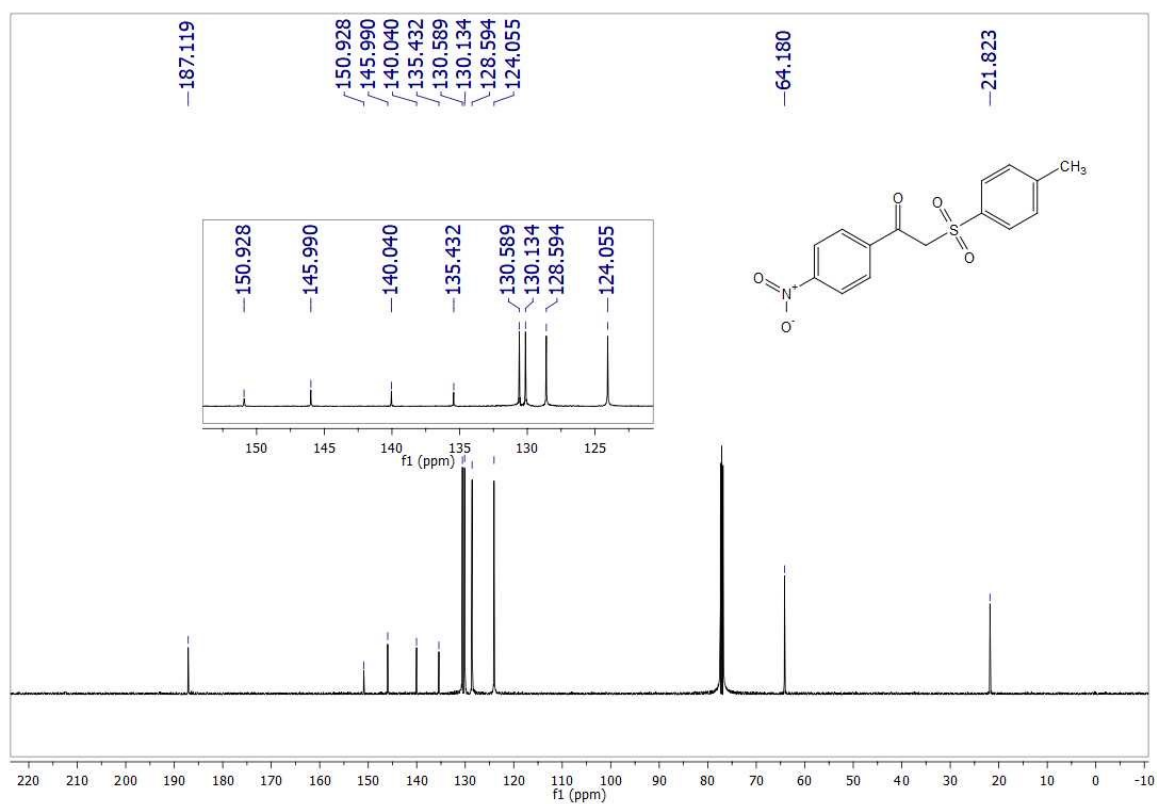

<sup>13</sup>C NMR (126 MHz, CDCl<sub>3</sub>) of compound 26.



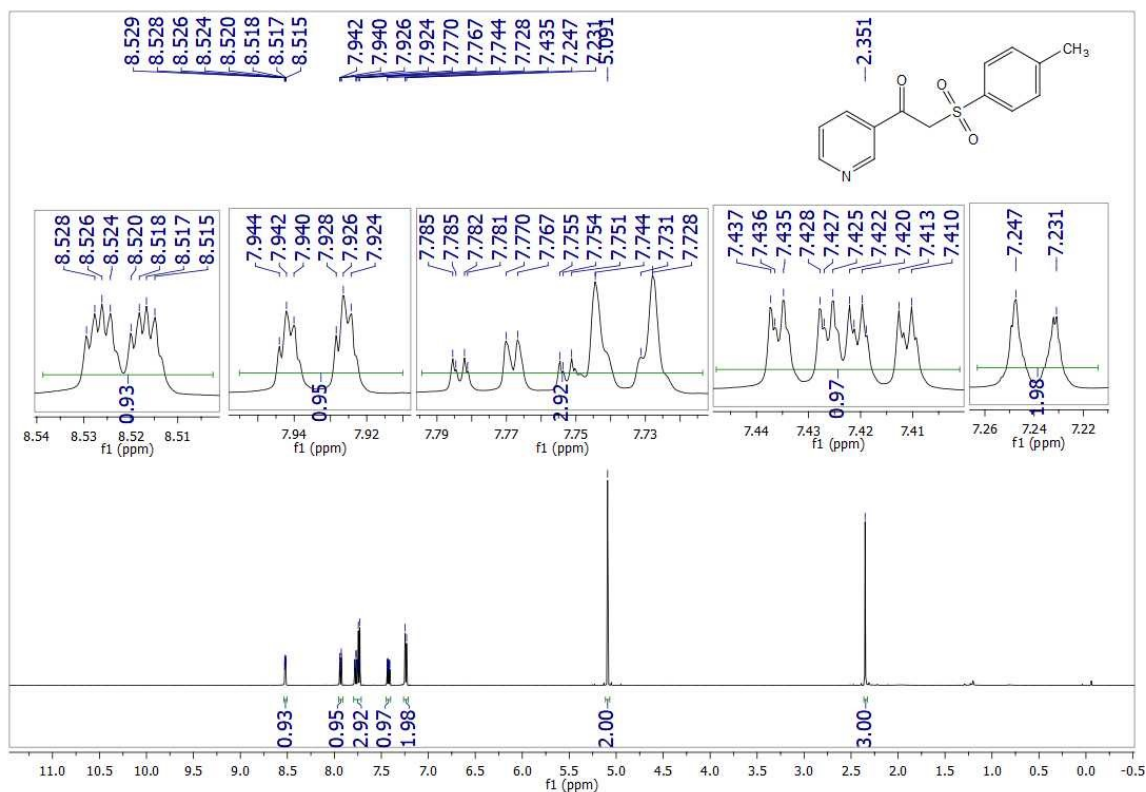

<sup>1</sup>H NMR (500 MHz, CDCl<sub>3</sub>) of compound 27.

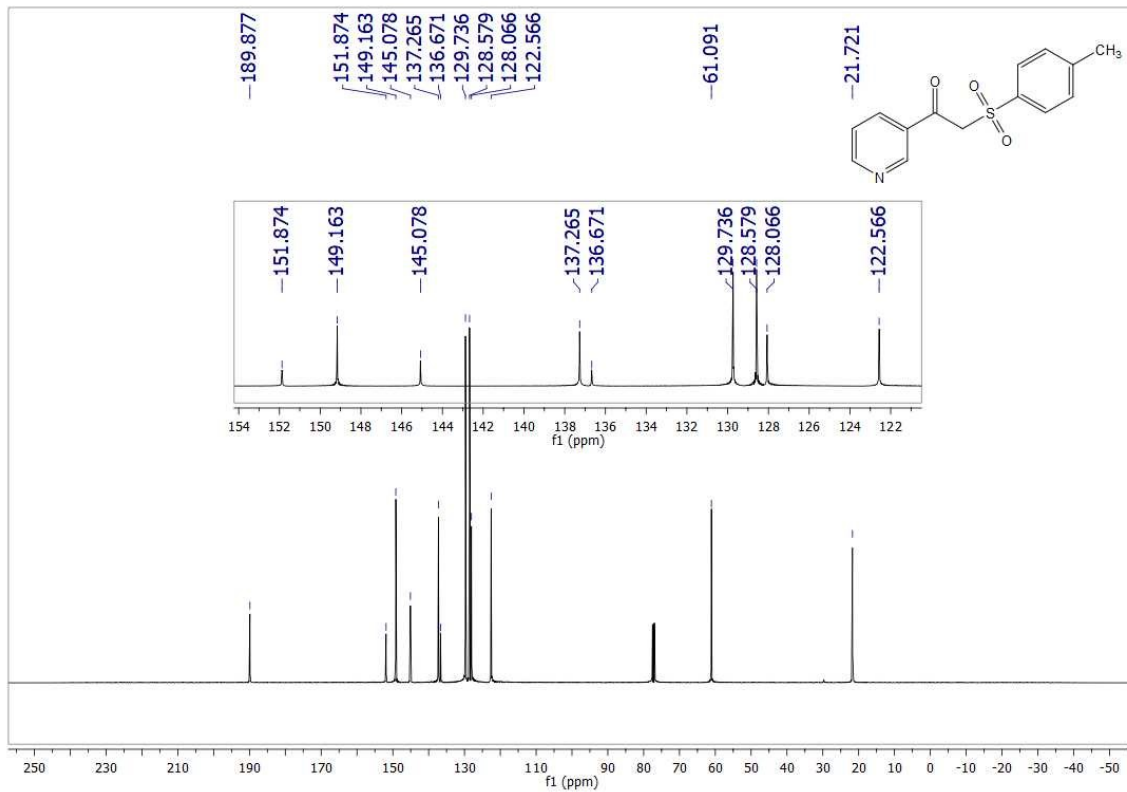

<sup>13</sup>C NMR (126 MHz, CDCl<sub>3</sub>) of compound 27.

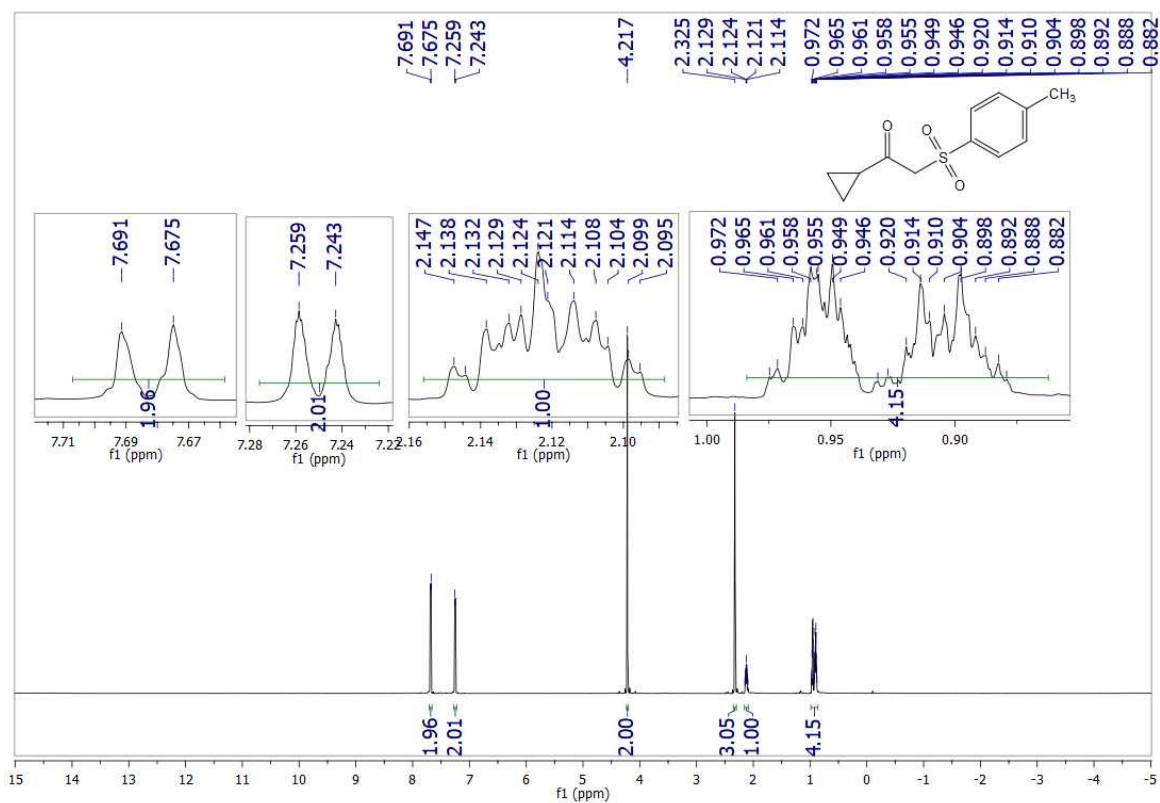

<sup>1</sup>H NMR (500 MHz, CDCl<sub>3</sub>) of compound **28**.

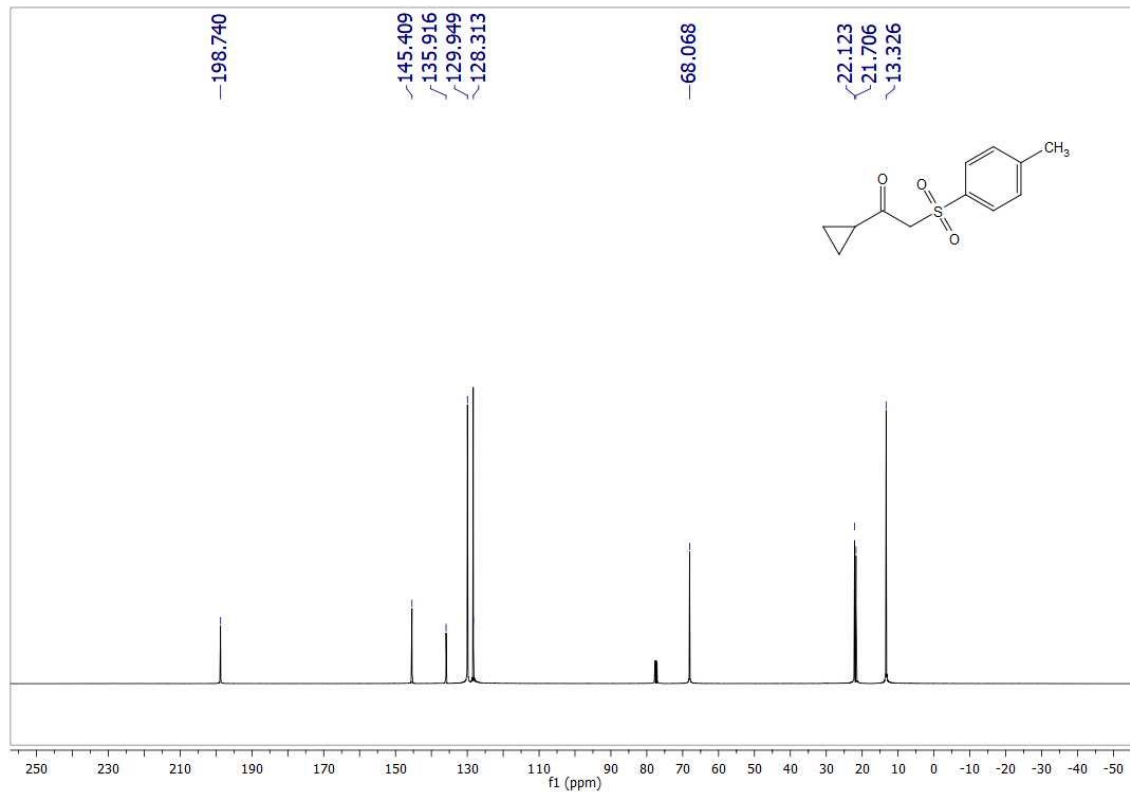

<sup>13</sup>C NMR (126 MHz, CDCl<sub>3</sub>) of compound **28**.



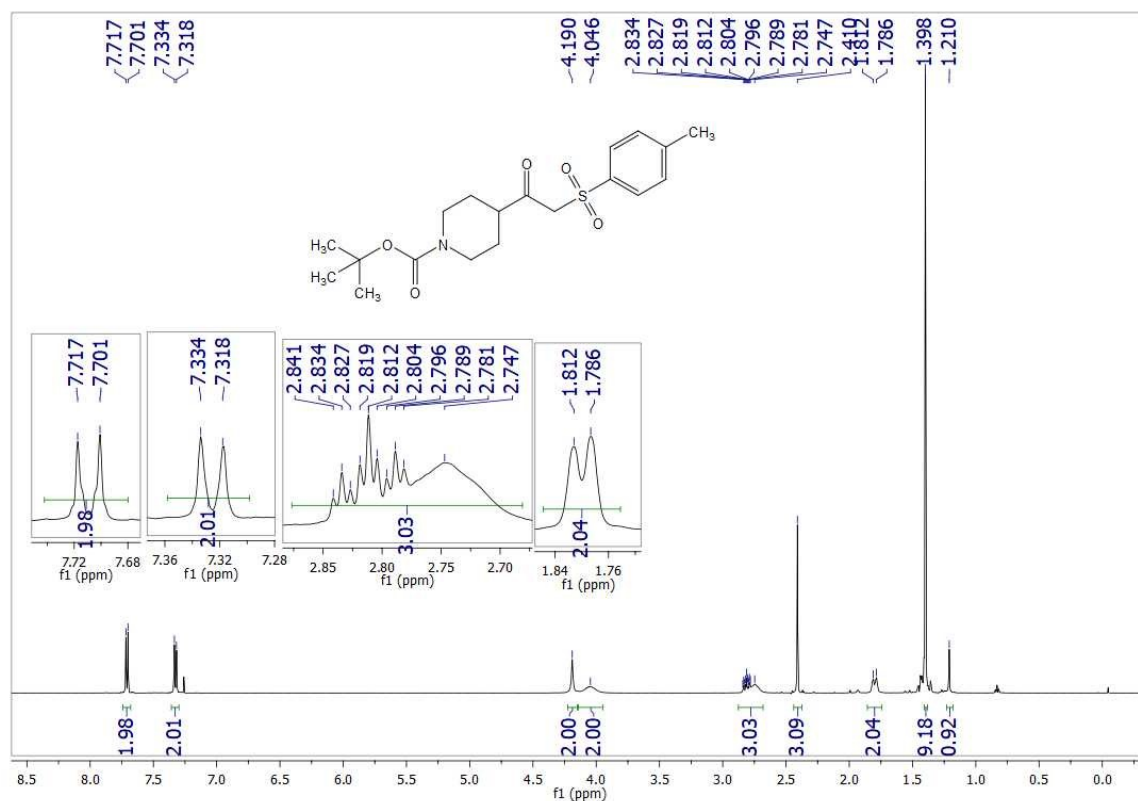

<sup>1</sup>H NMR (500 MHz, CDCl<sub>3</sub>) of compound **29**.

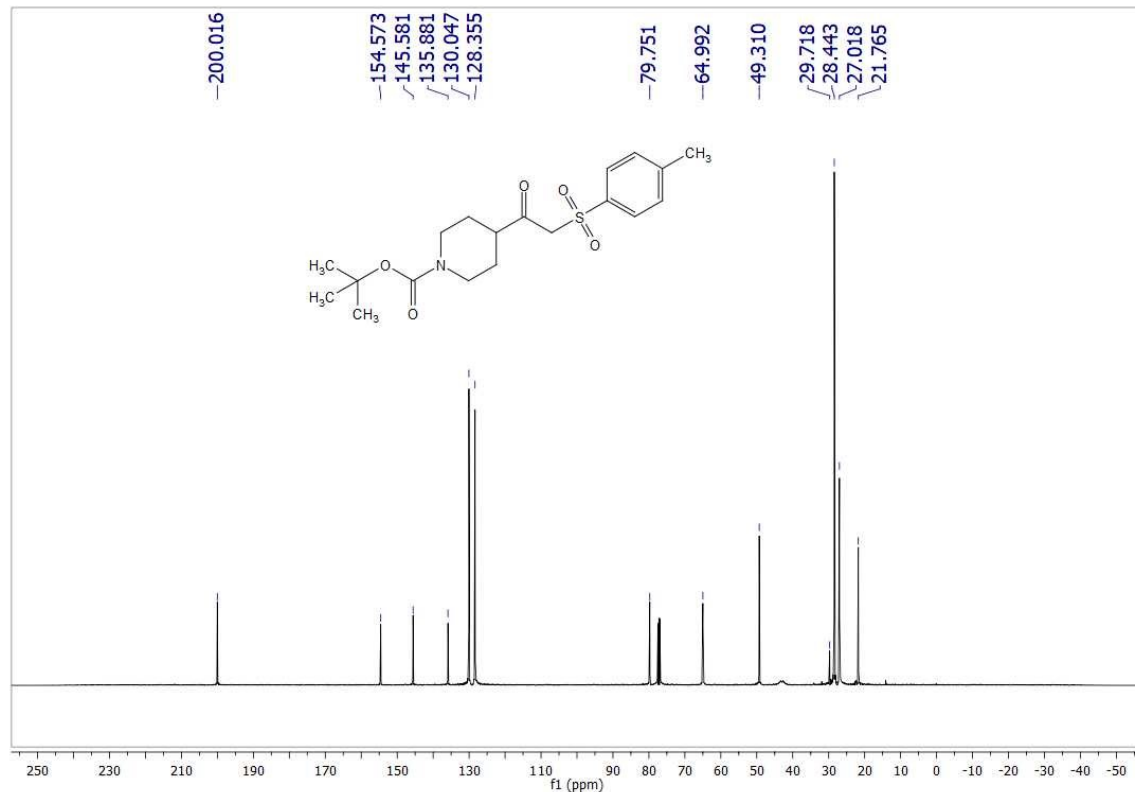

<sup>13</sup>C NMR (126 MHz, CDCl<sub>3</sub>) of compound **29**.

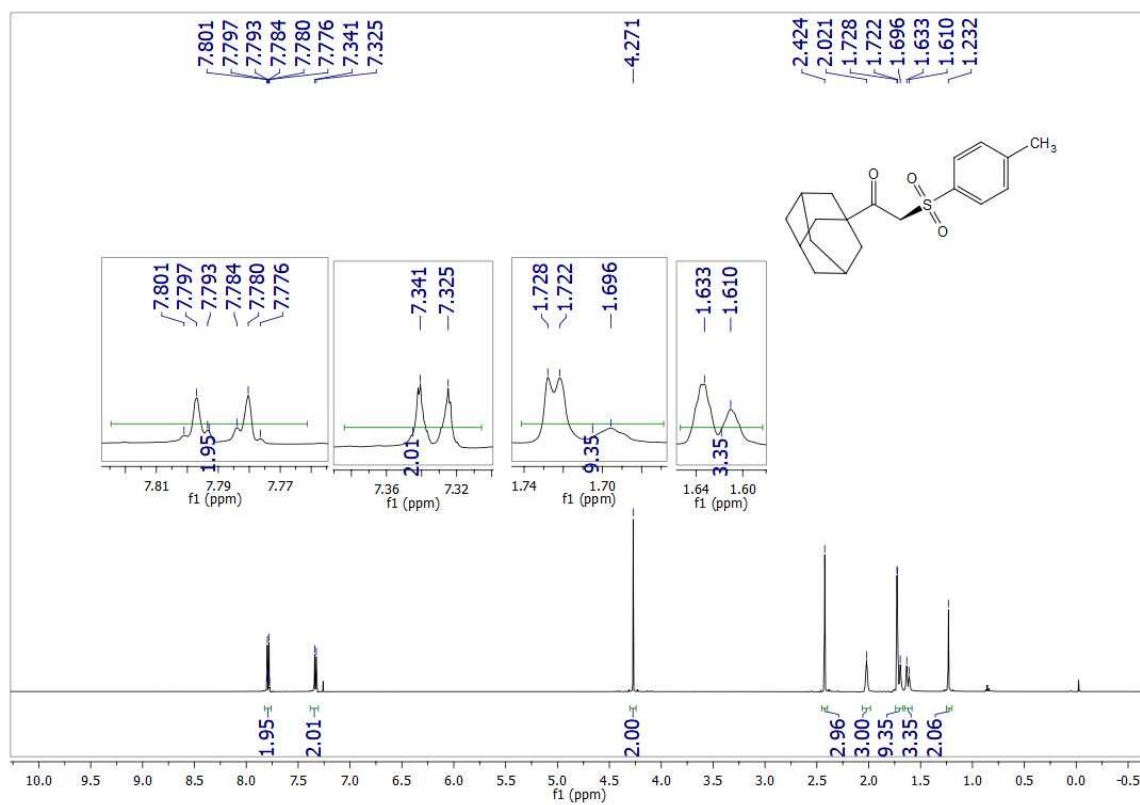

<sup>1</sup>H NMR (500 MHz, CDCl<sub>3</sub>) of compound **30**.

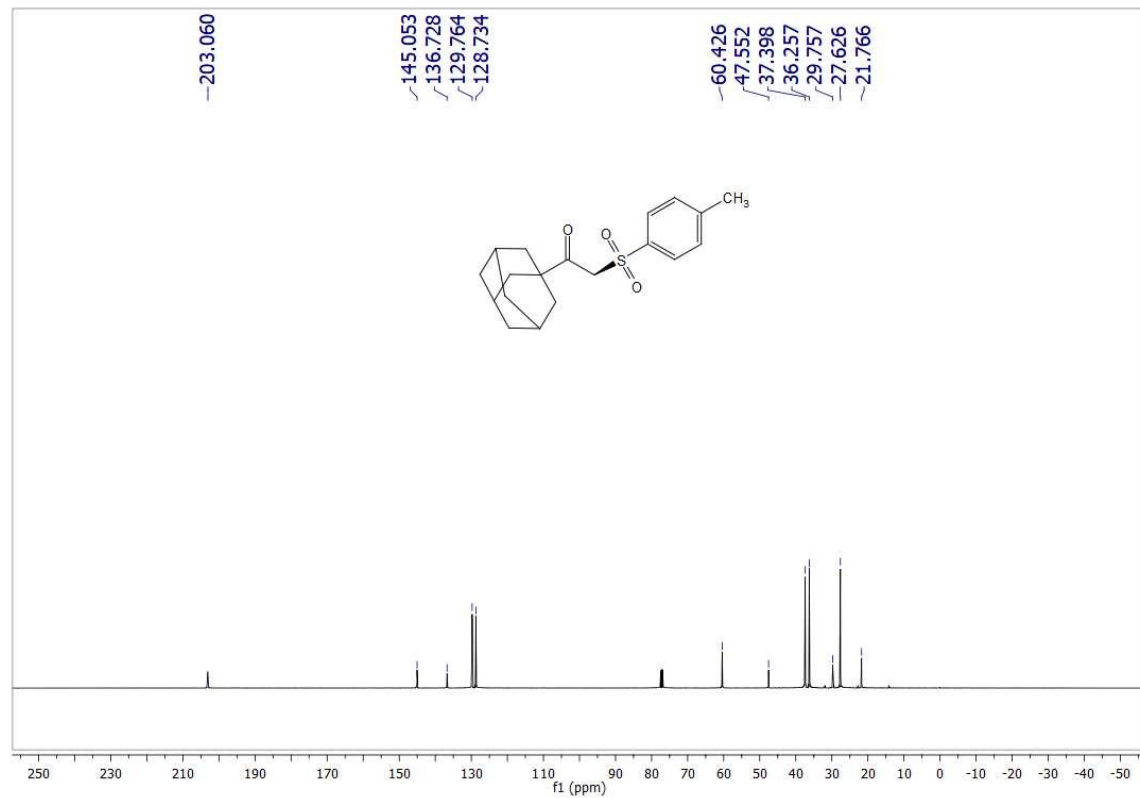

<sup>13</sup>C NMR (126 MHz, CDCl<sub>3</sub>) of compound **30**.

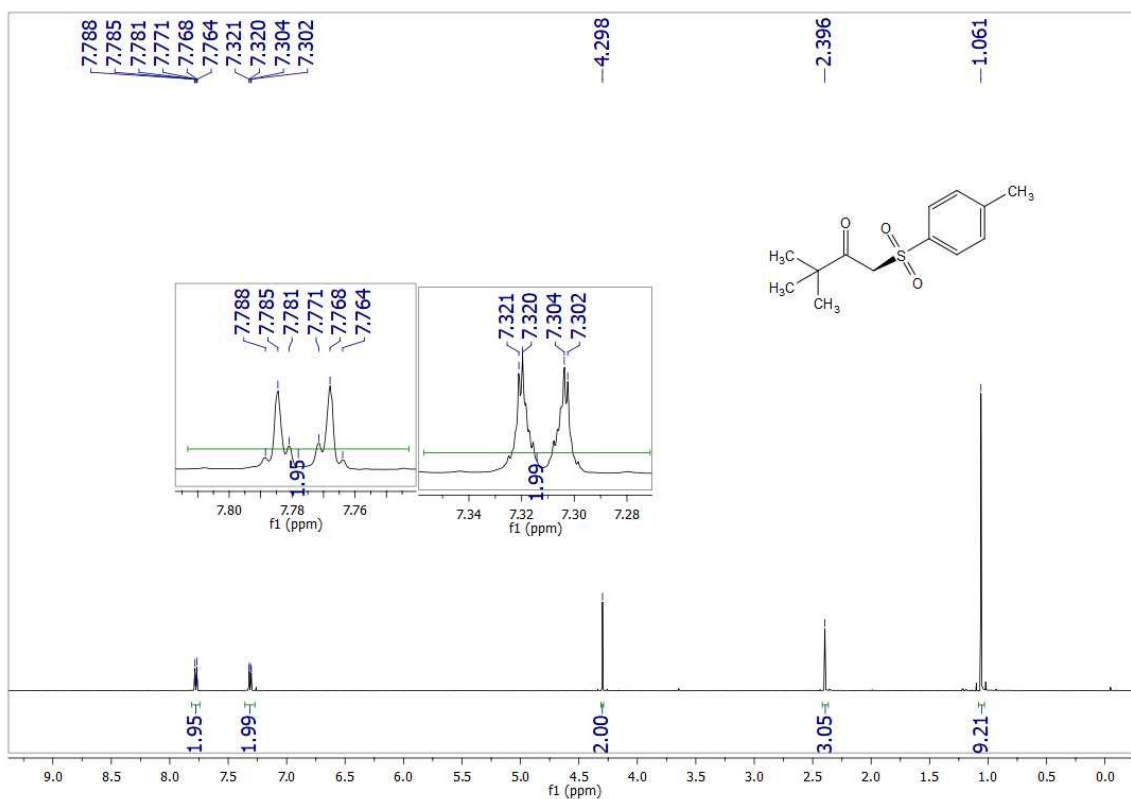

<sup>1</sup>H NMR (500 MHz, CDCl<sub>3</sub>) of compound **31**.

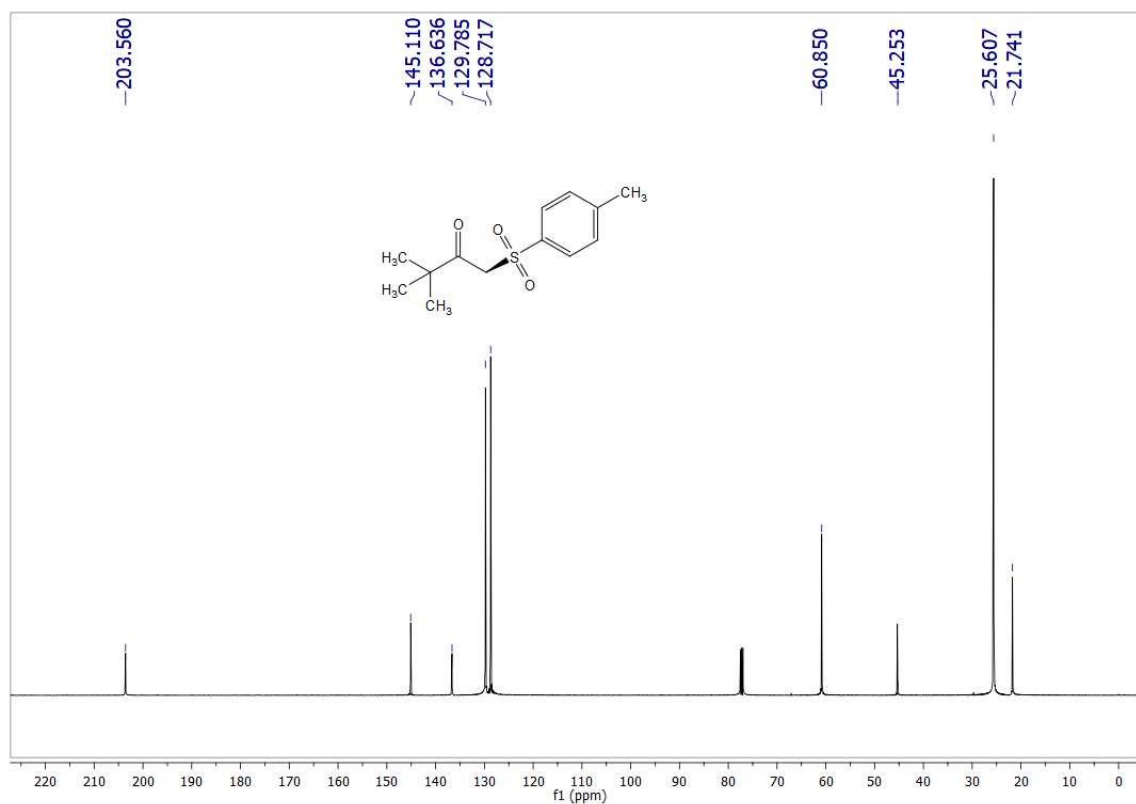

<sup>13</sup>C NMR (126 MHz, CDCl<sub>3</sub>) of compound **31**.

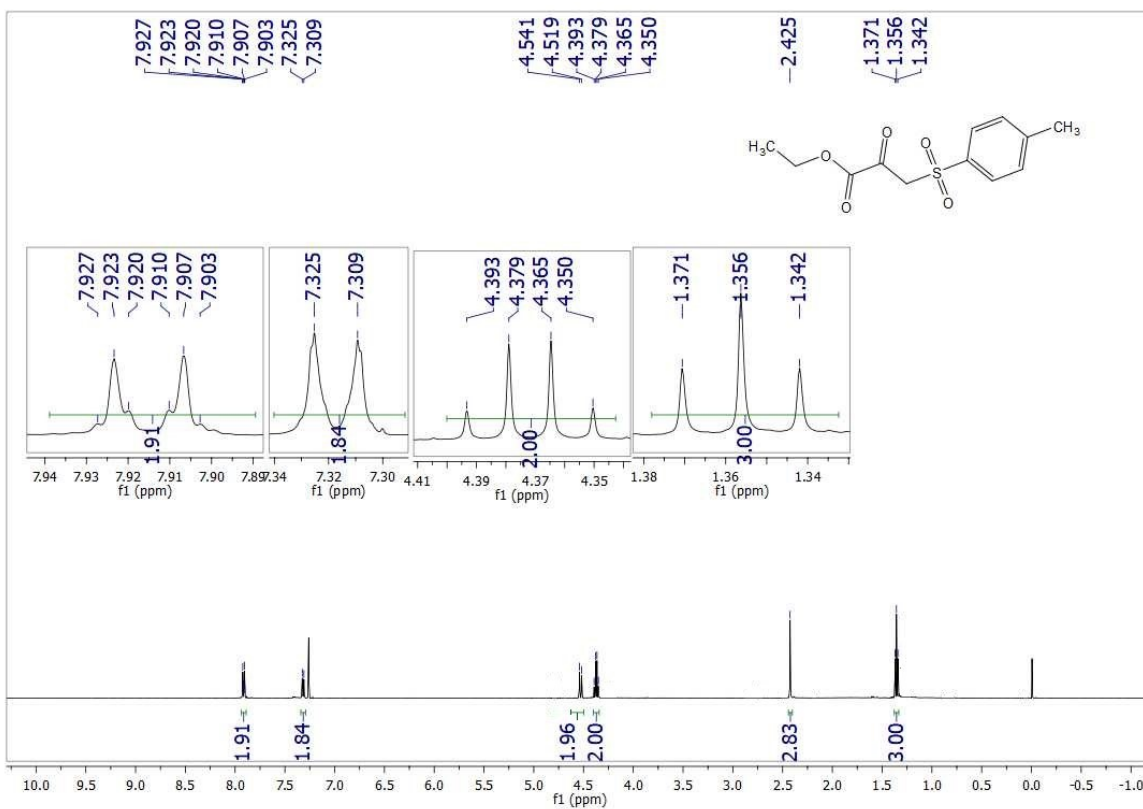

<sup>1</sup>H NMR (500 MHz, CDCl<sub>3</sub>) of compound **32**.

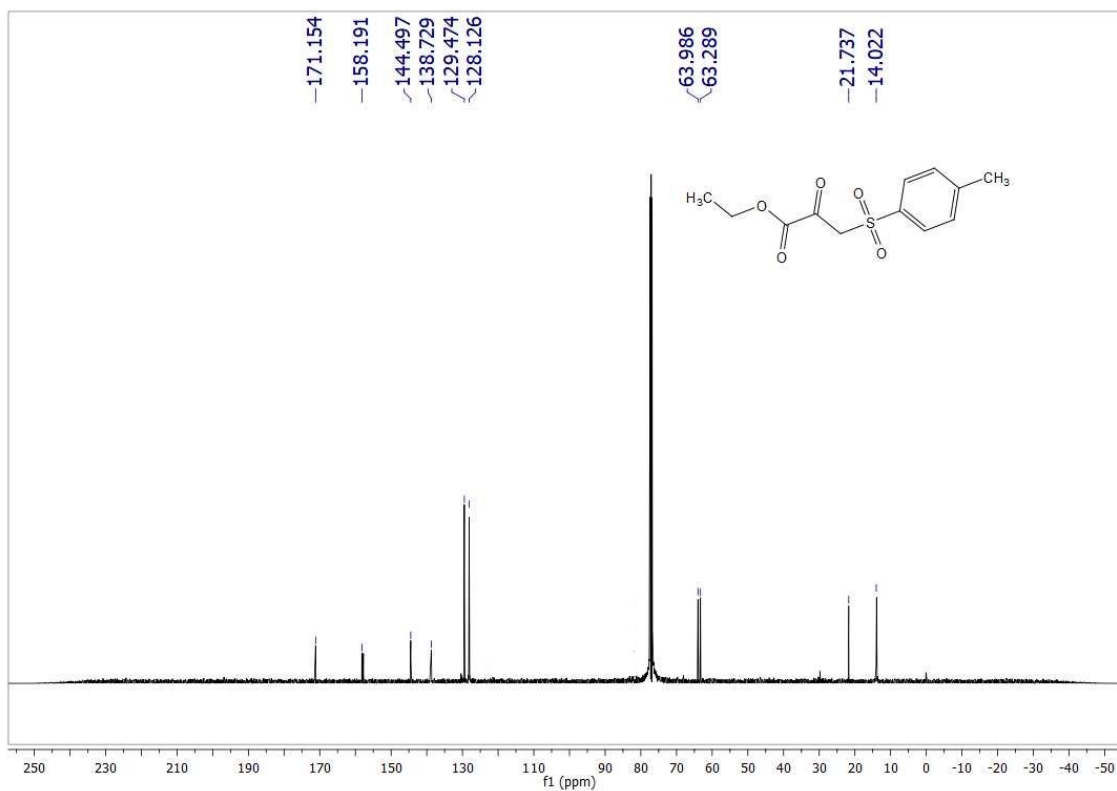

<sup>13</sup>C NMR (126 MHz, CDCl<sub>3</sub>) of compound **32**.

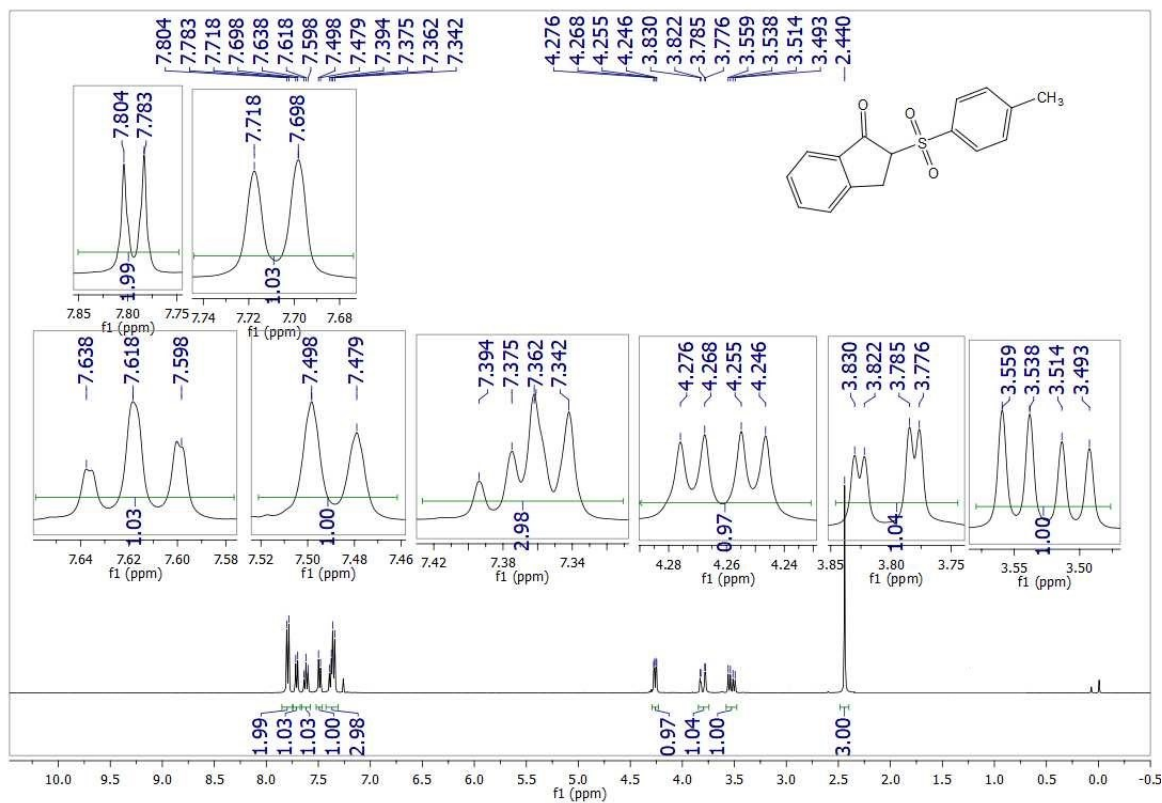

<sup>1</sup>H NMR (500 MHz, CDCl<sub>3</sub>) of compound 33.

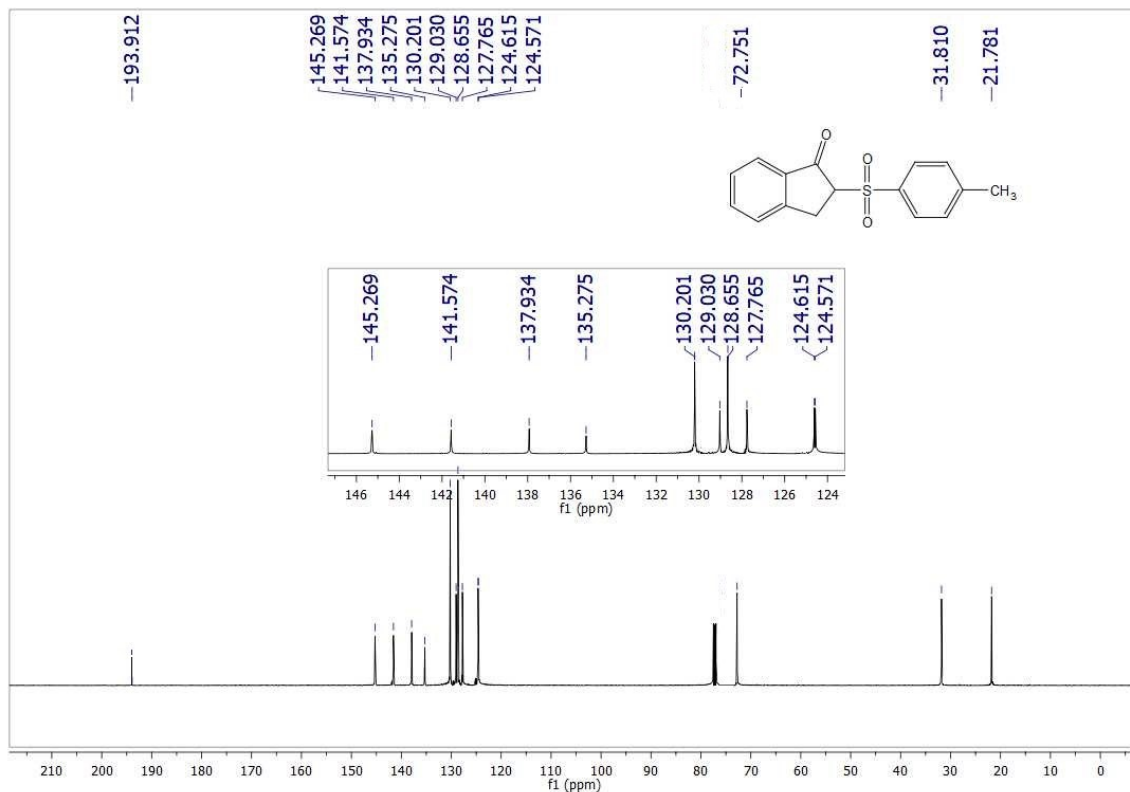

<sup>13</sup>C NMR (126 MHz, CDCl<sub>3</sub>) of compound 33.

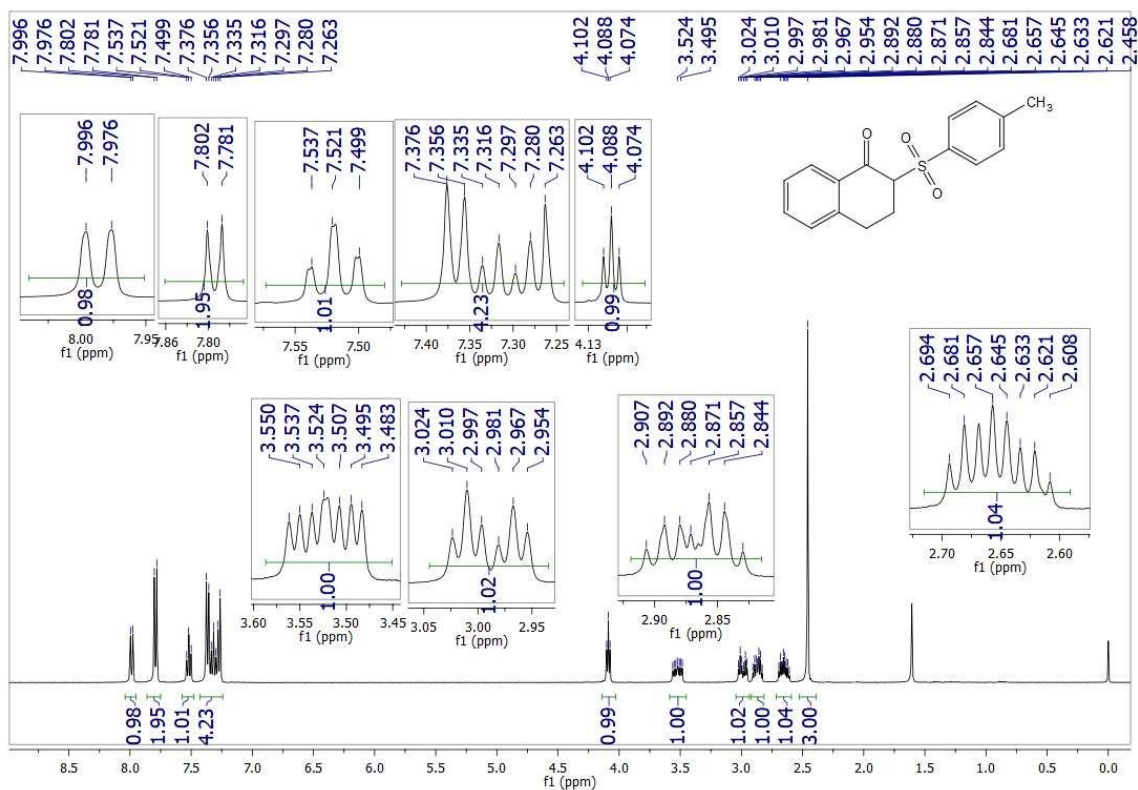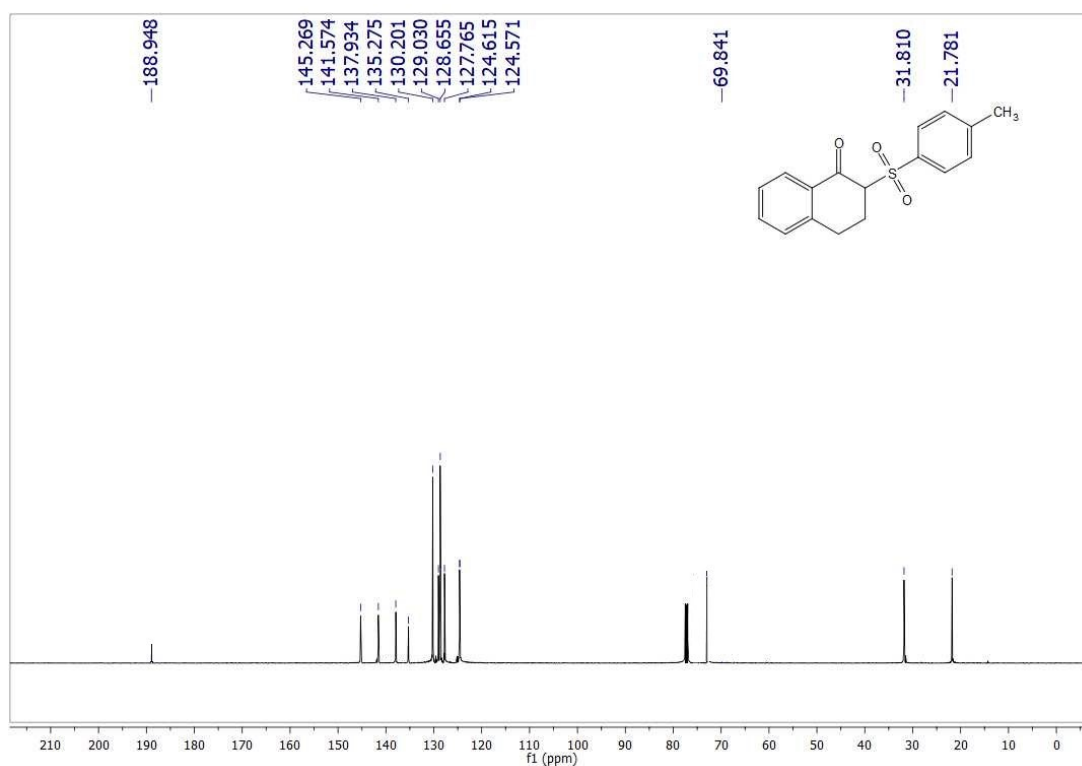



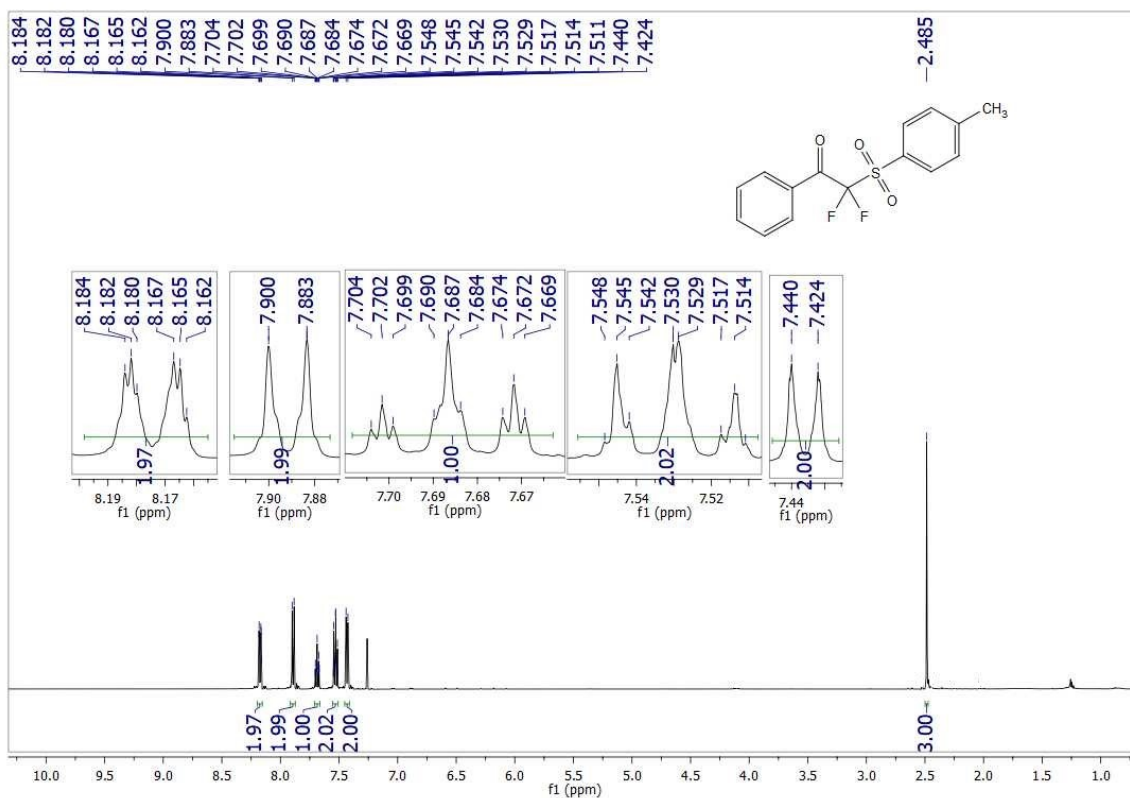

<sup>1</sup>H NMR (500 MHz, CDCl<sub>3</sub>) of compound **35**.

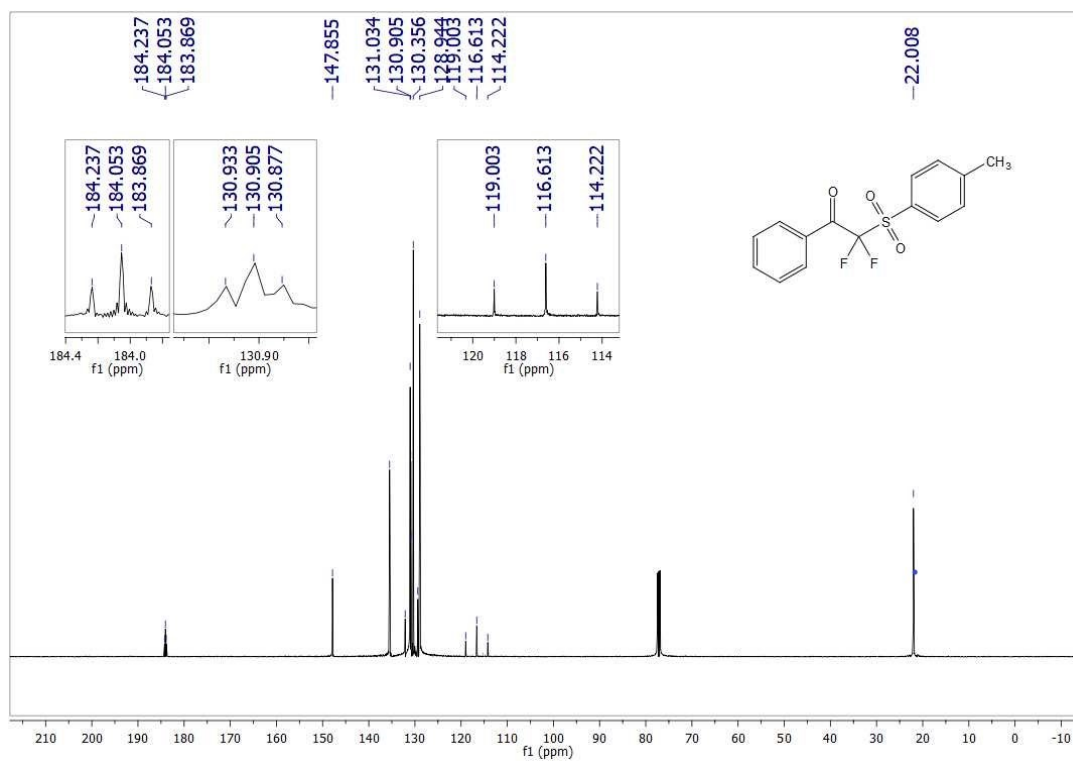

<sup>13</sup>C NMR (126 MHz, CDCl<sub>3</sub>) of compound **35**.

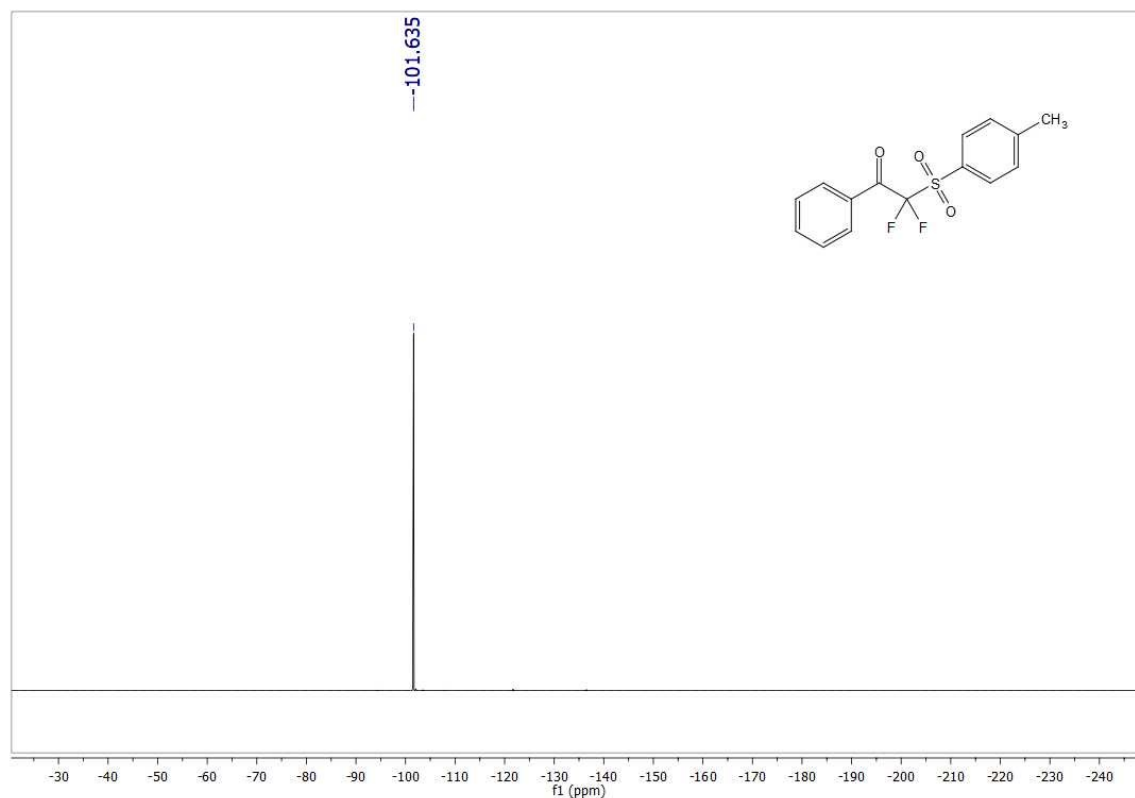

$^{19}\text{F}$  NMR (472 MHz,  $\text{CDCl}_3$ ) of compound 35.

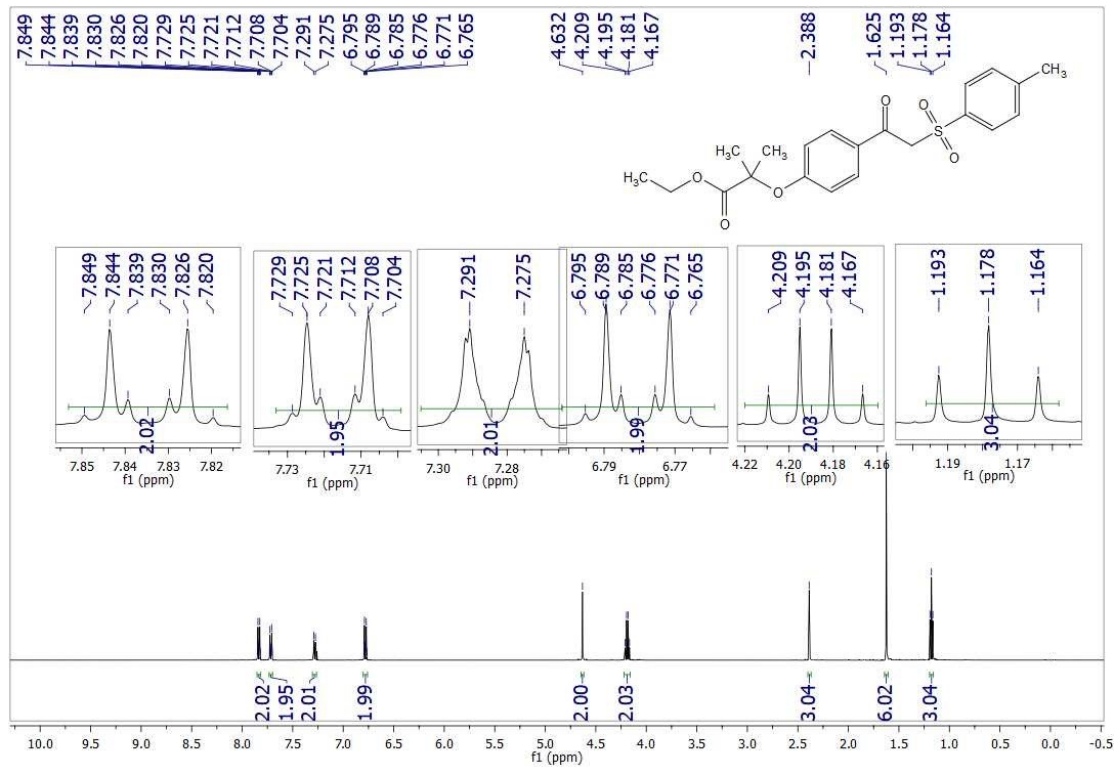

$^1\text{H}$  NMR (500 MHz,  $\text{CDCl}_3$ ) of compound 36.



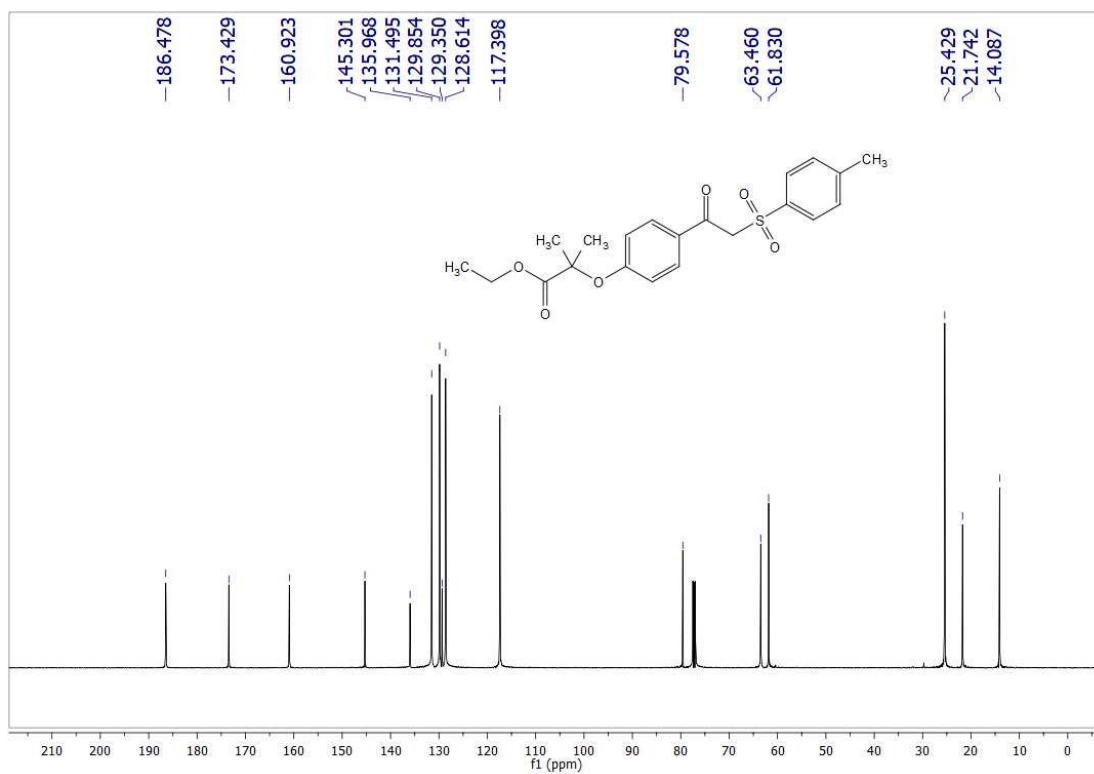

<sup>13</sup>C NMR (126 MHz, CDCl<sub>3</sub>) of compound **36**.

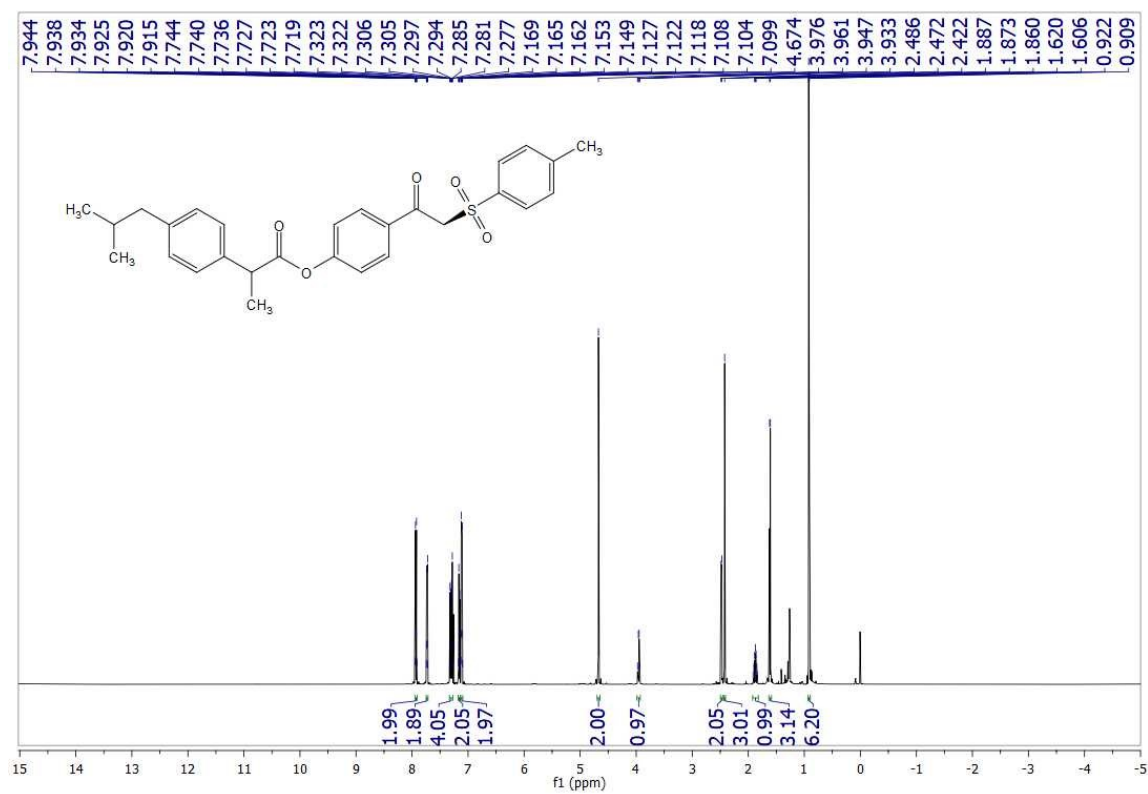

<sup>1</sup>H NMR (500 MHz, CDCl<sub>3</sub>) of compound **37**.

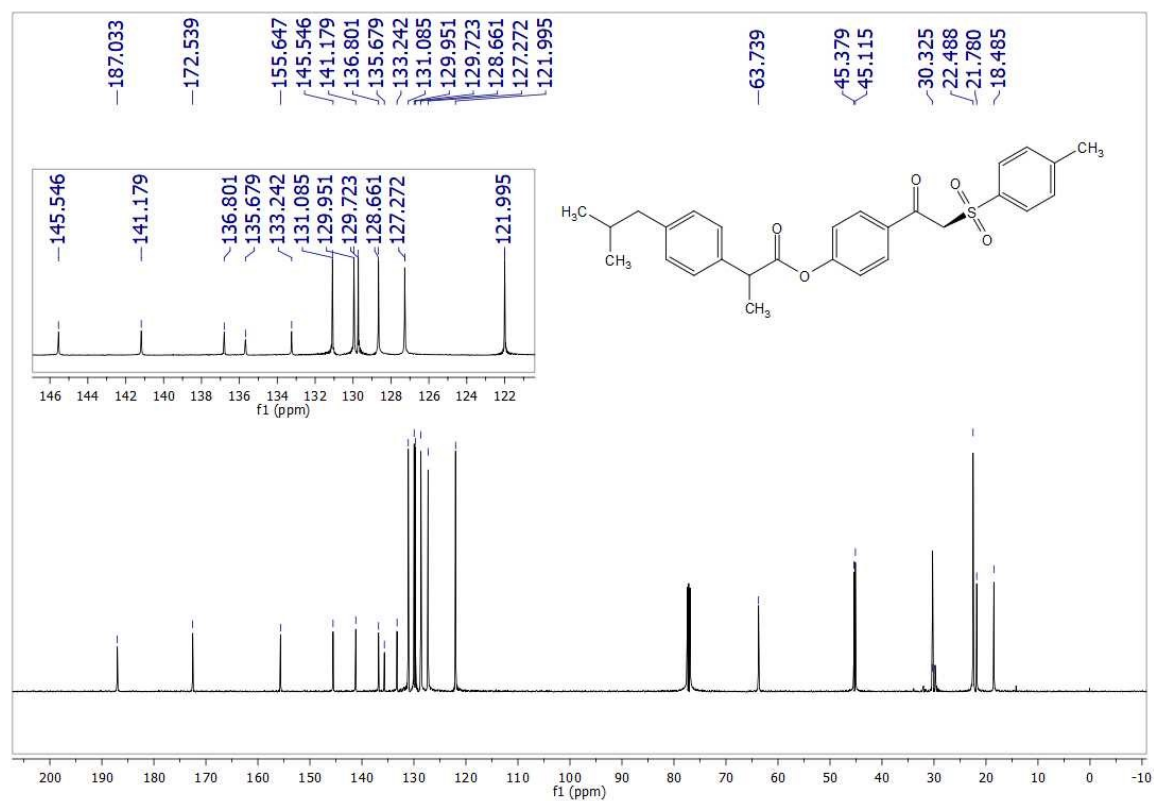

<sup>13</sup>C NMR (126 MHz, CDCl<sub>3</sub>) of compound **37**.

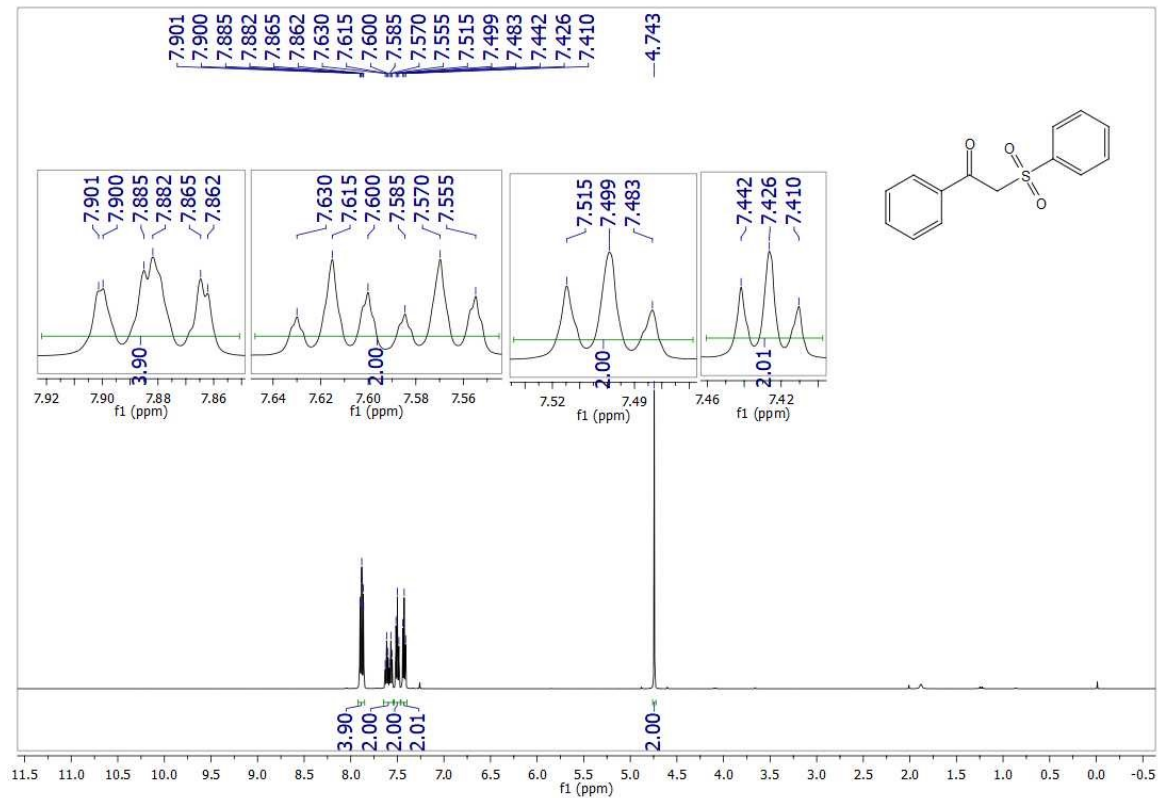

<sup>1</sup>H NMR (500 MHz, CDCl<sub>3</sub>) of compound **38**.

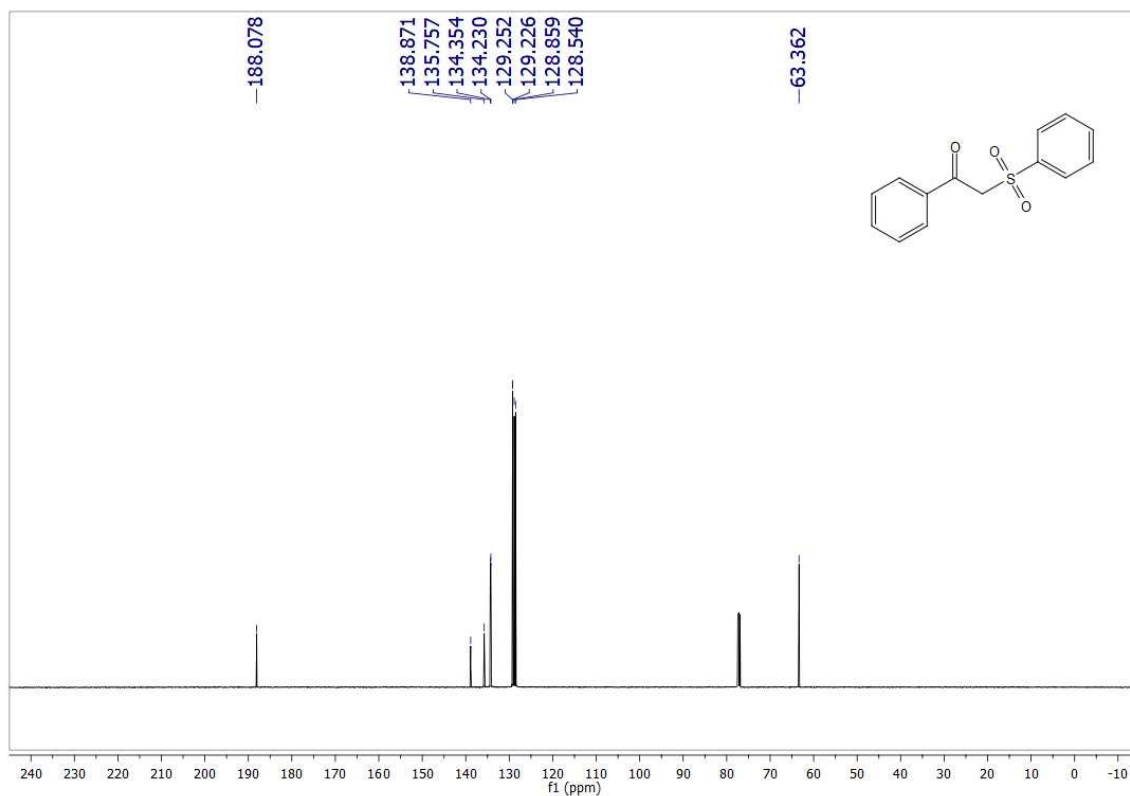

$^{13}\text{C}$  NMR (126 MHz,  $\text{CDCl}_3$ ) of compound 38.

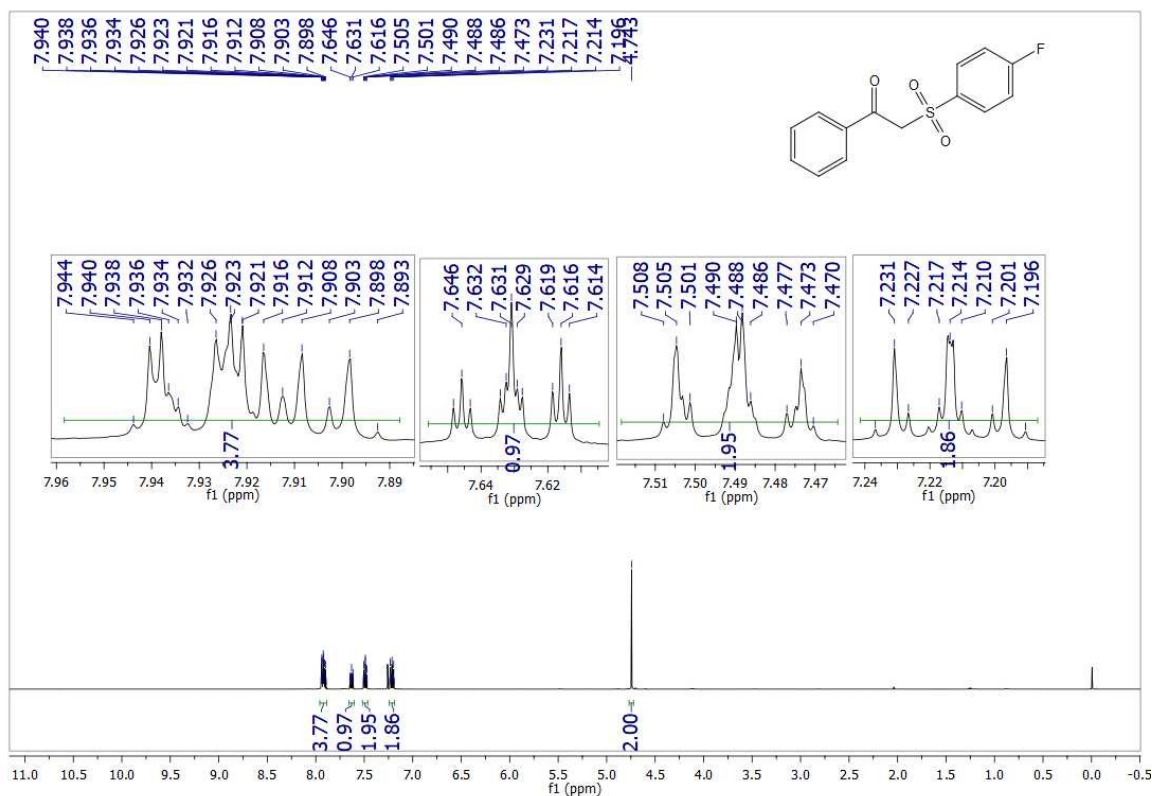

$^1\text{H}$  NMR (500 MHz,  $\text{CDCl}_3$ ) of compound 39.

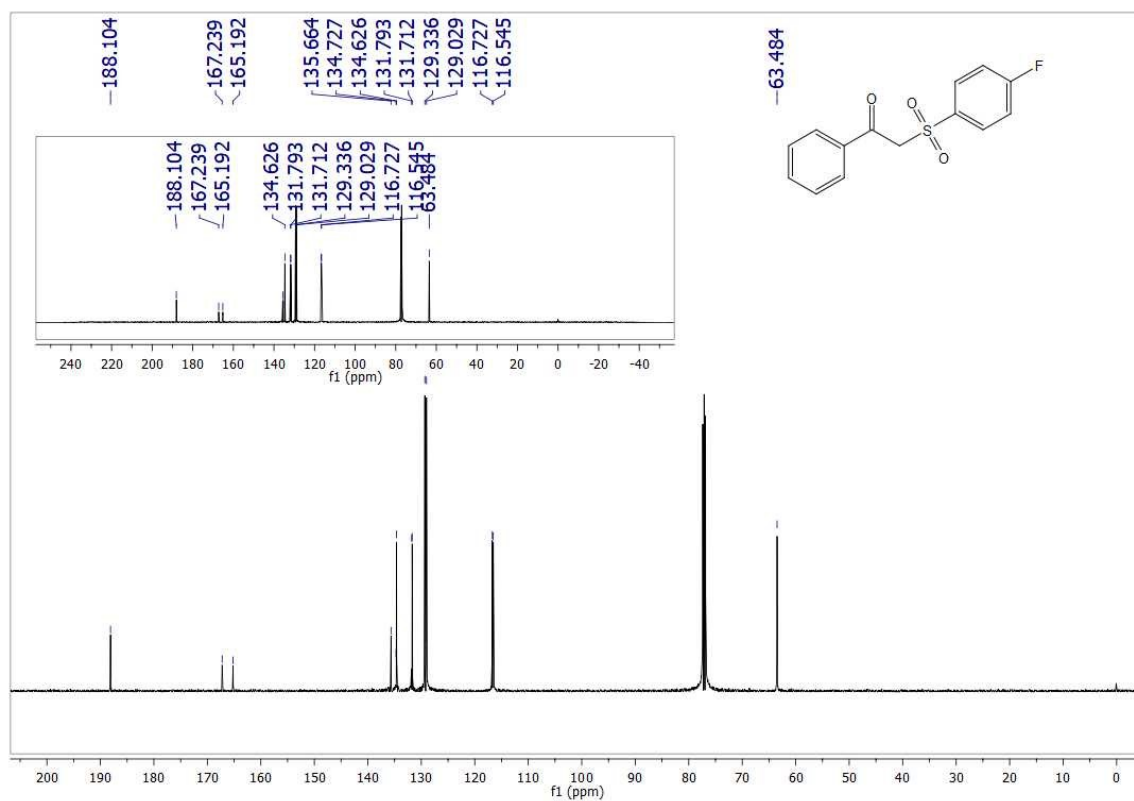

<sup>13</sup>C NMR (126 MHz, CDCl<sub>3</sub>) of compound **39**.

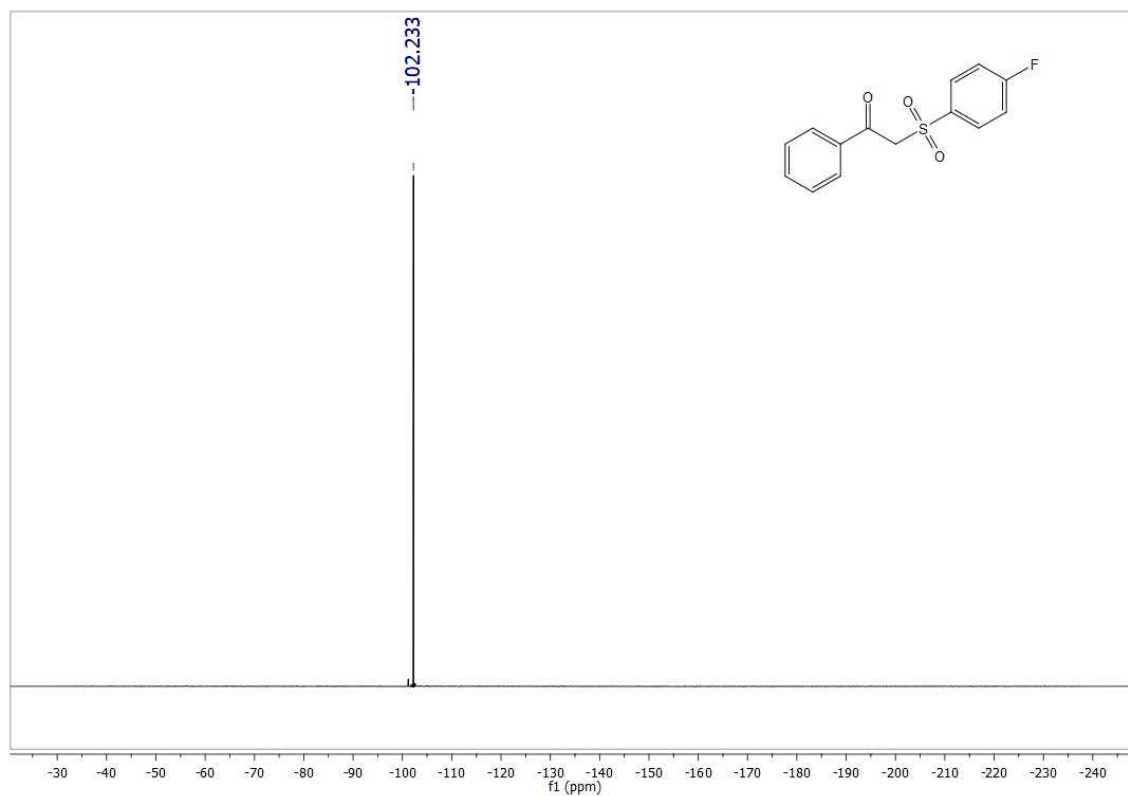

<sup>19</sup>F NMR (472 MHz, CDCl<sub>3</sub>) of compound **39**.

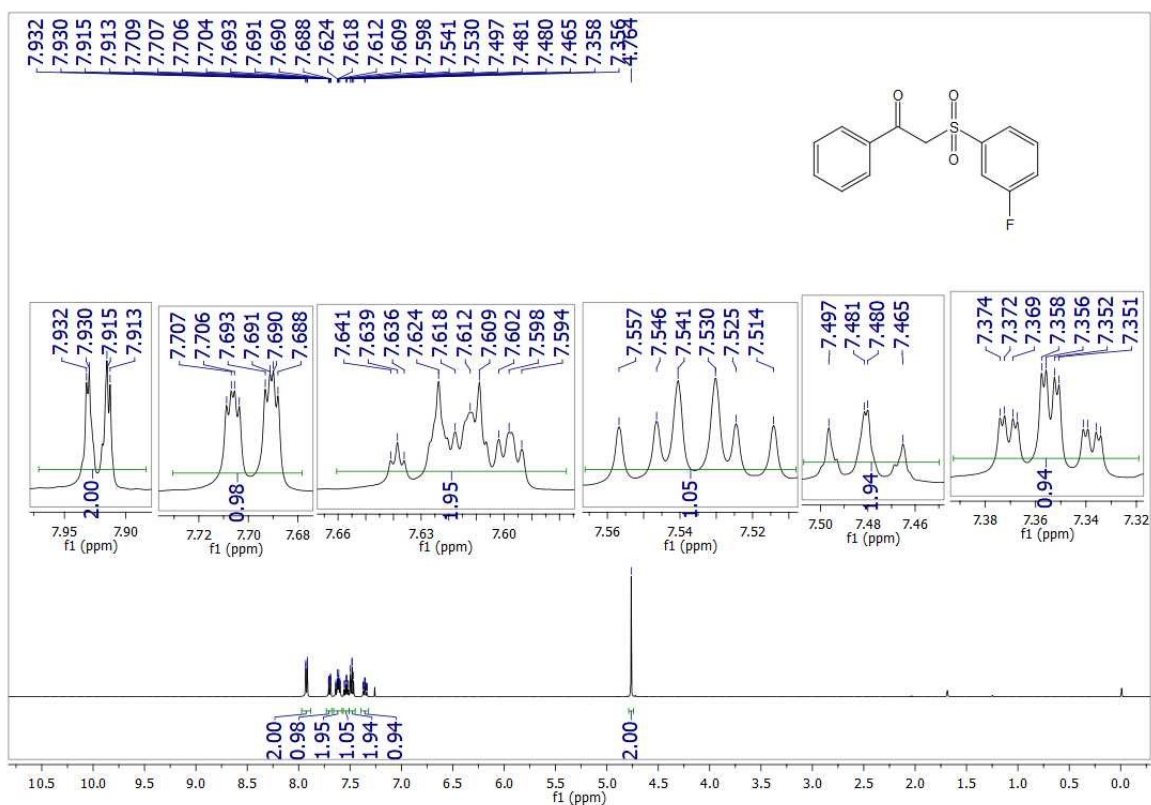

<sup>1</sup>H NMR (500 MHz, CDCl<sub>3</sub>) of compound **40**.

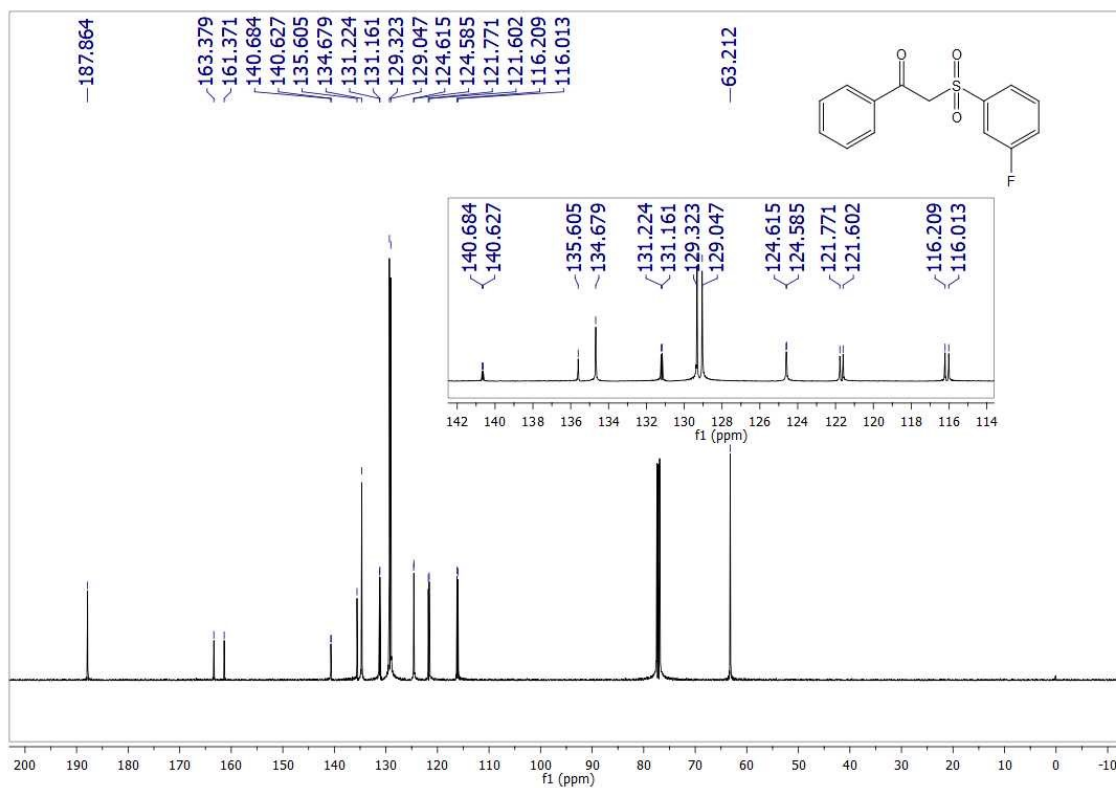

<sup>13</sup>C NMR (126 MHz, CDCl<sub>3</sub>) of compound **40**.

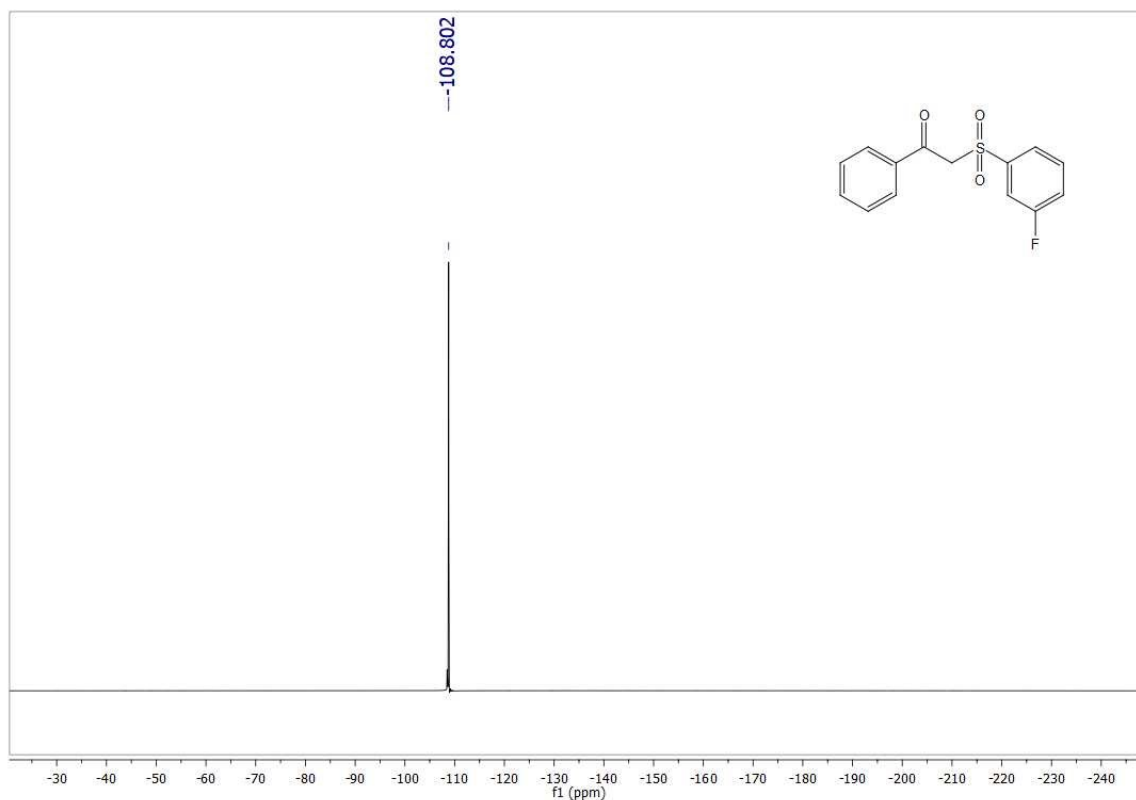

$^{19}\text{F}$  NMR (472 MHz,  $\text{CDCl}_3$ ) of compound 40.

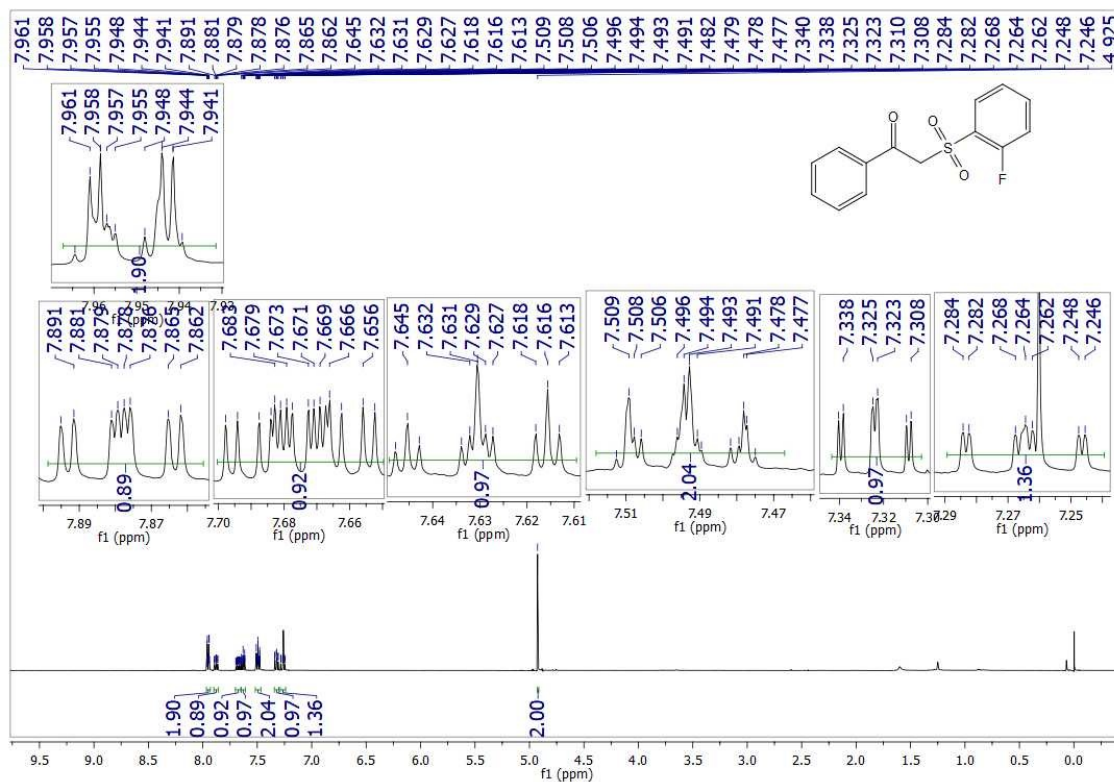

$^1\text{H}$  NMR (500 MHz,  $\text{CDCl}_3$ ) of compound 41.



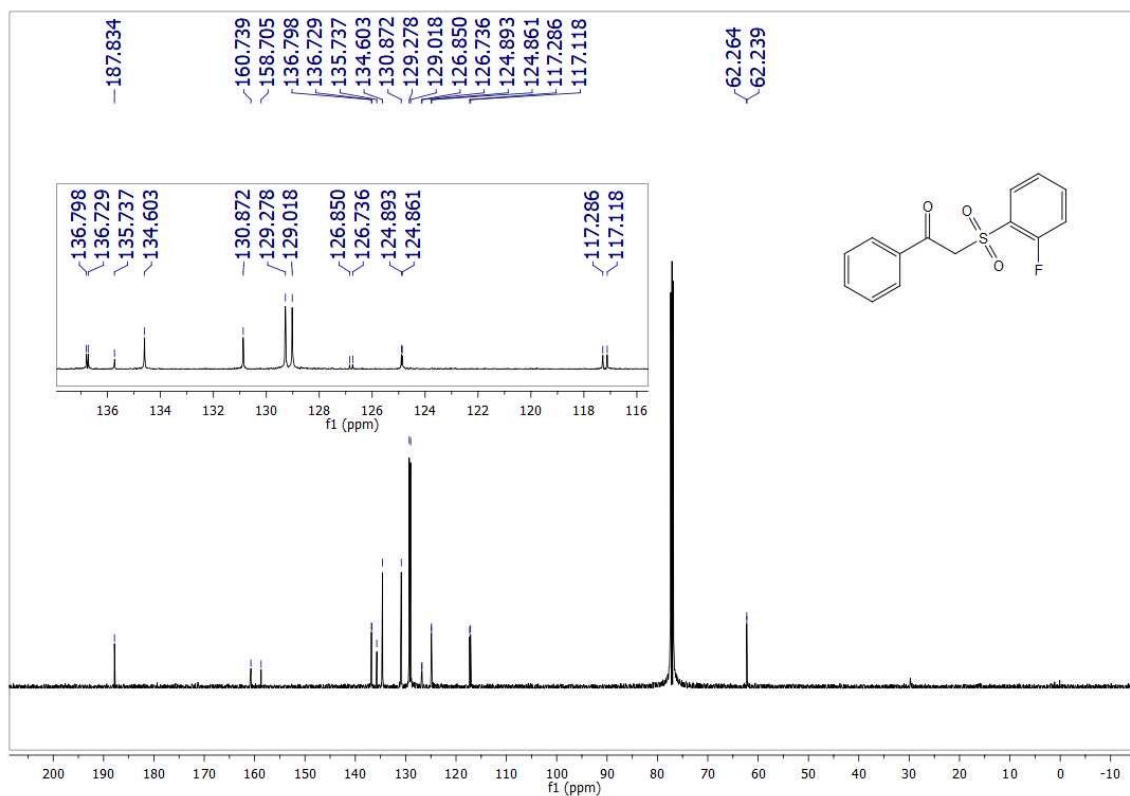

<sup>13</sup>C NMR (126 MHz, CDCl<sub>3</sub>) of compound 41.

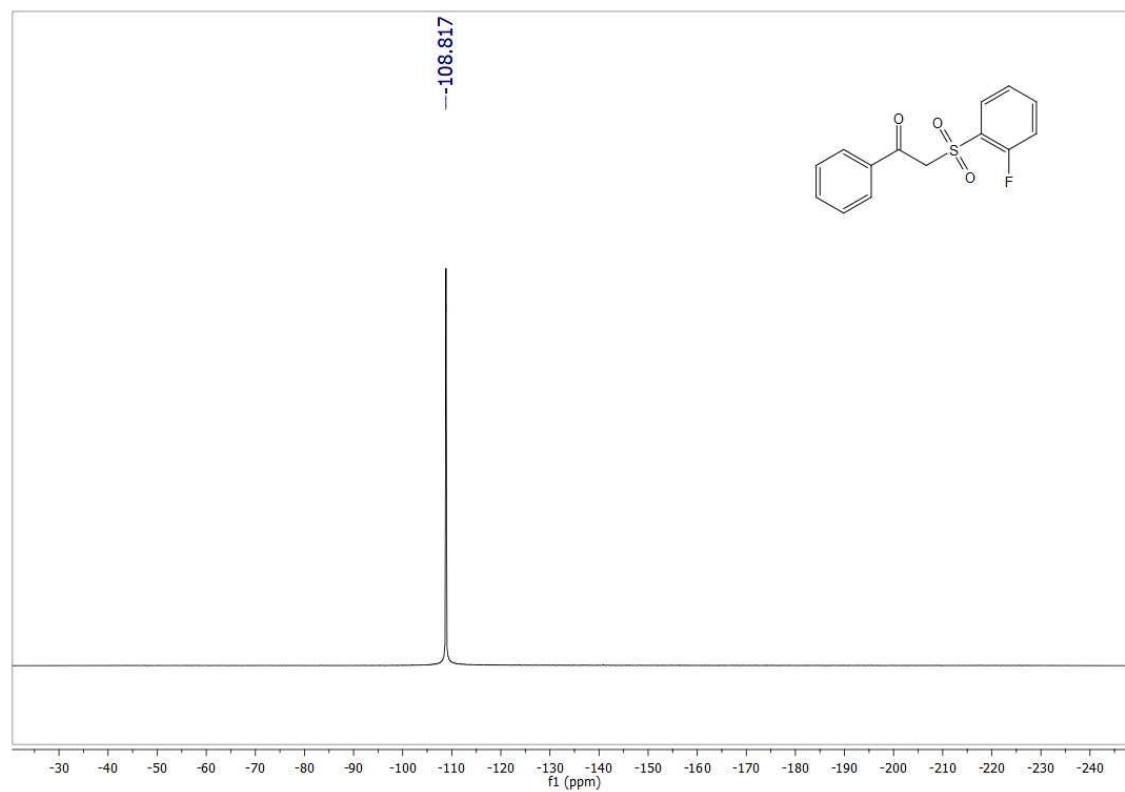

<sup>19</sup>F NMR (472 MHz, CDCl<sub>3</sub>) of compound 41.

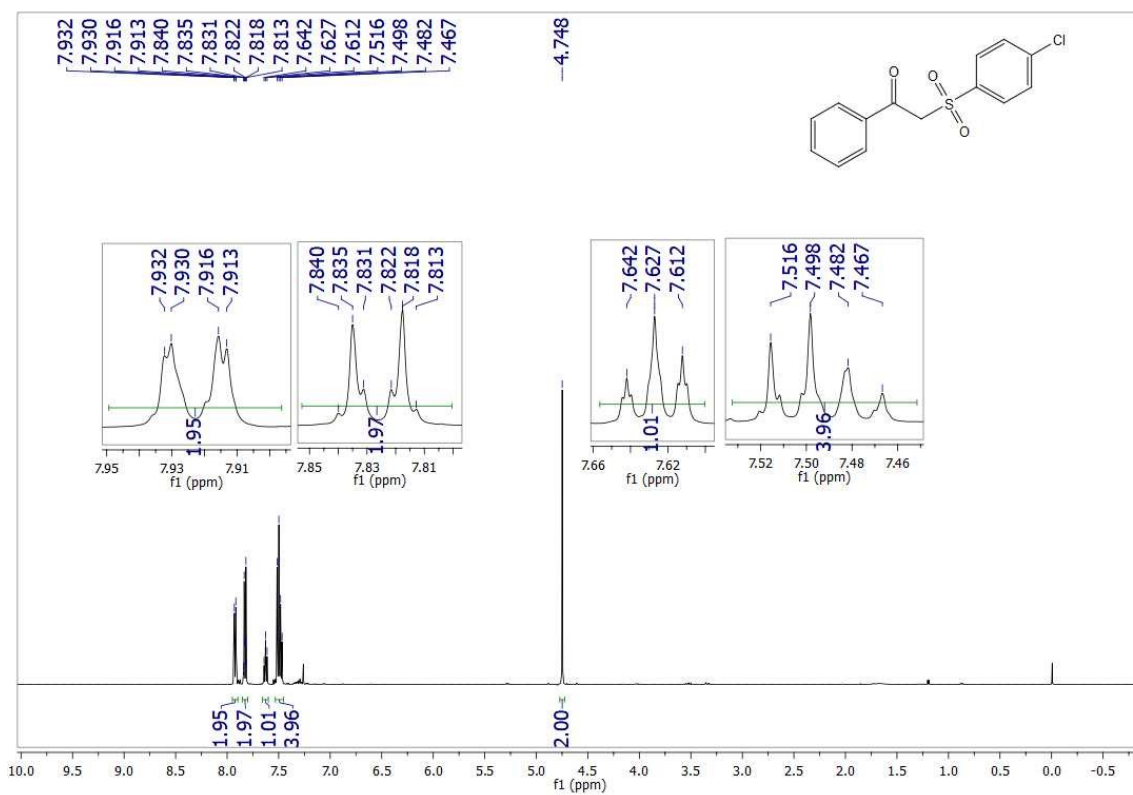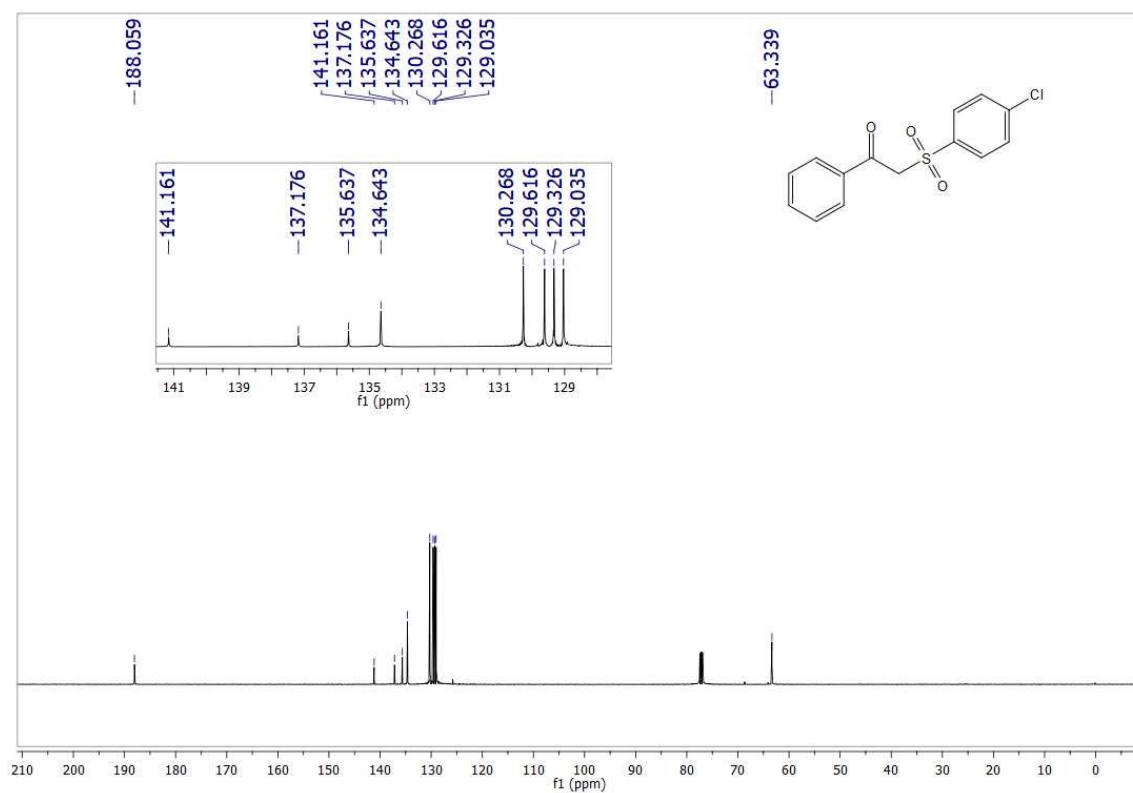



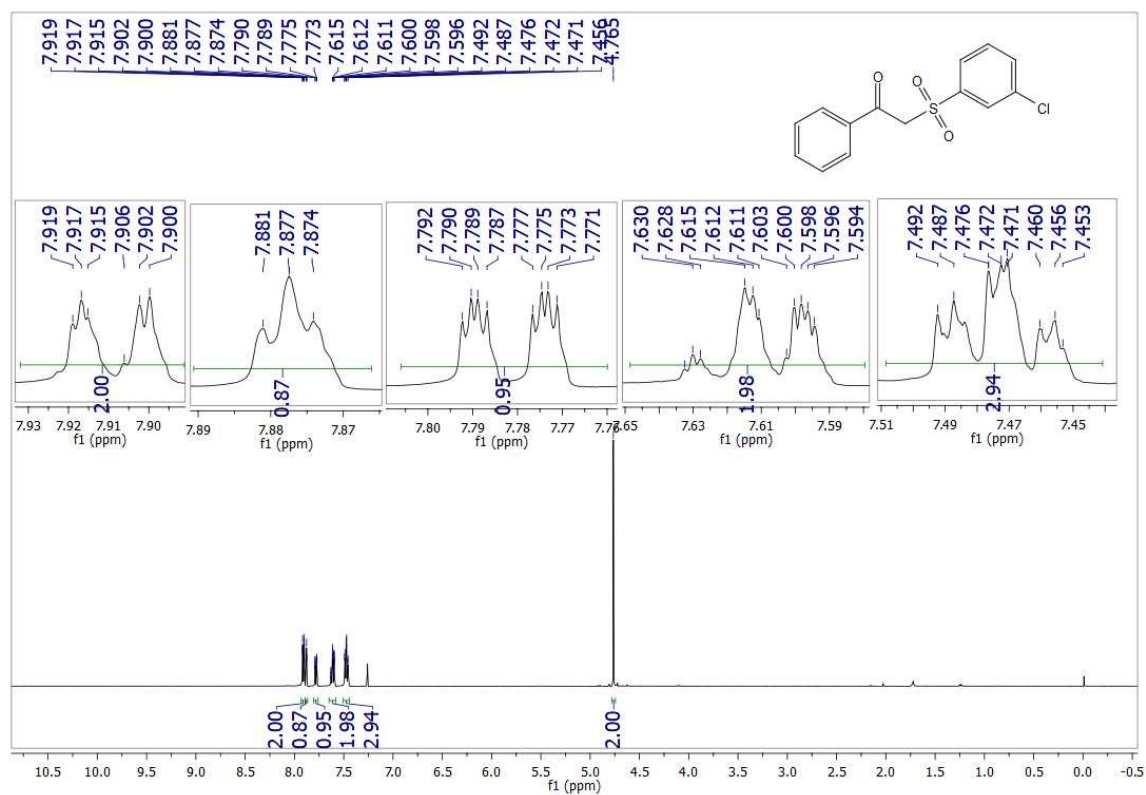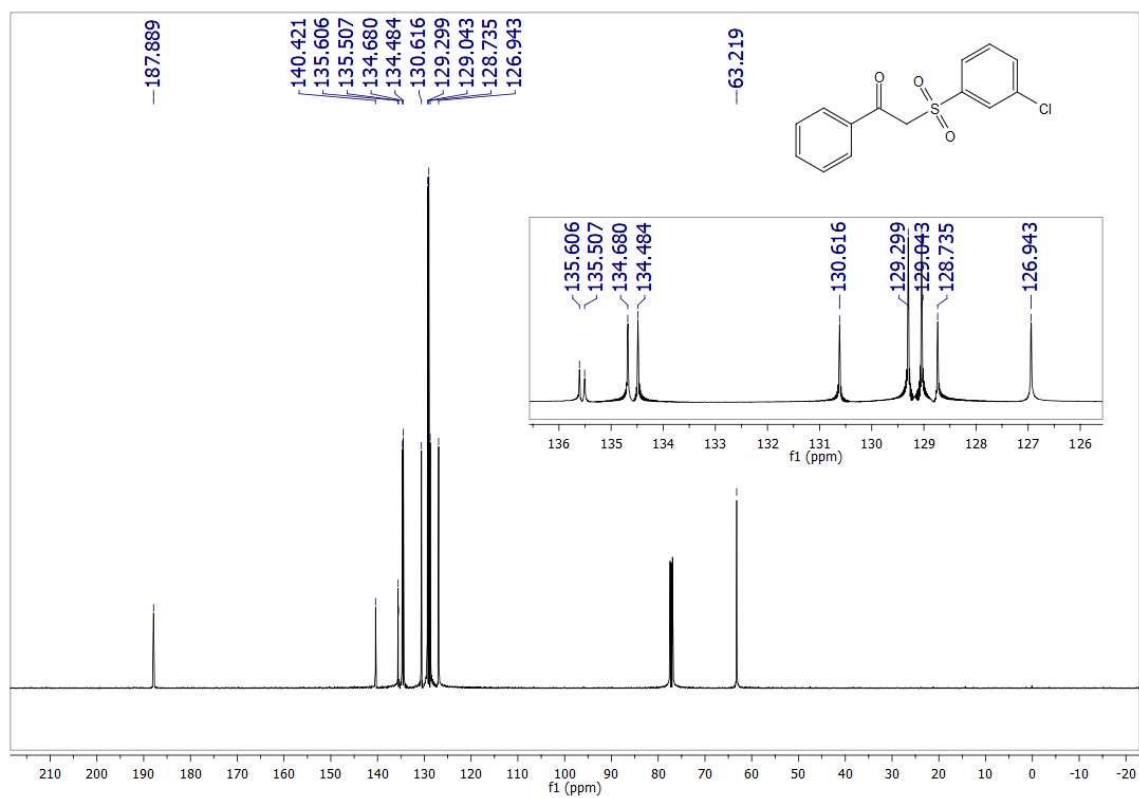

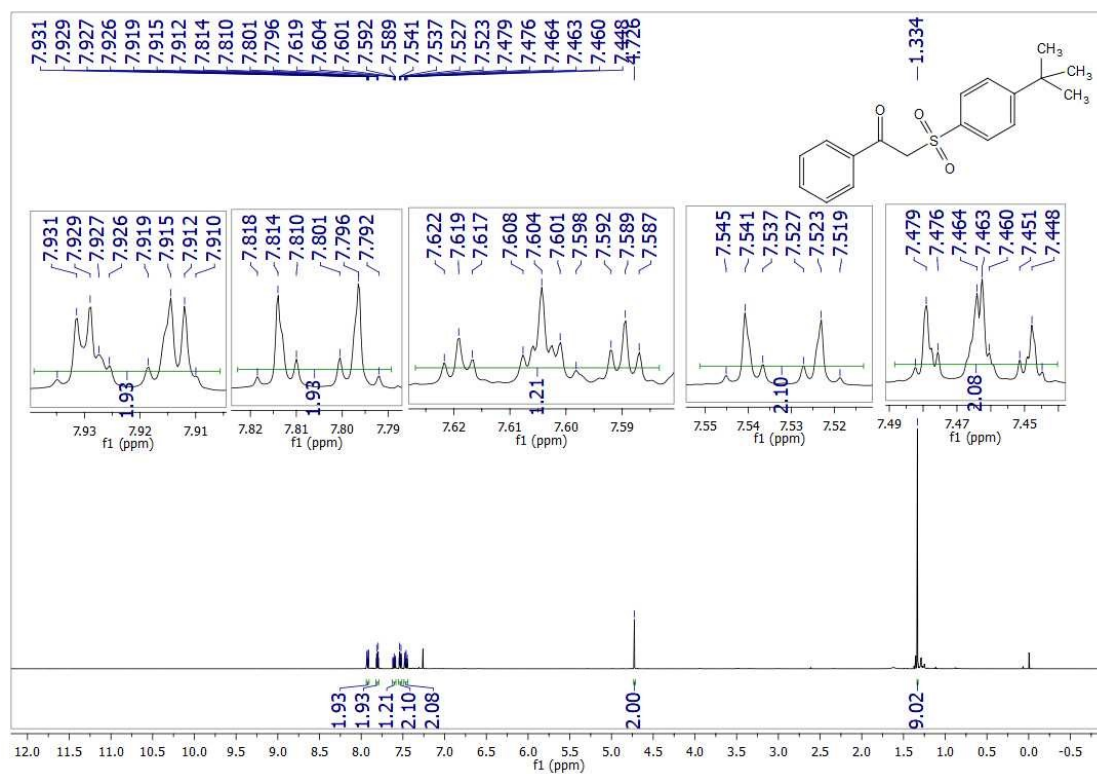

<sup>1</sup>H NMR (500 MHz, CDCl<sub>3</sub>) of compound 44.

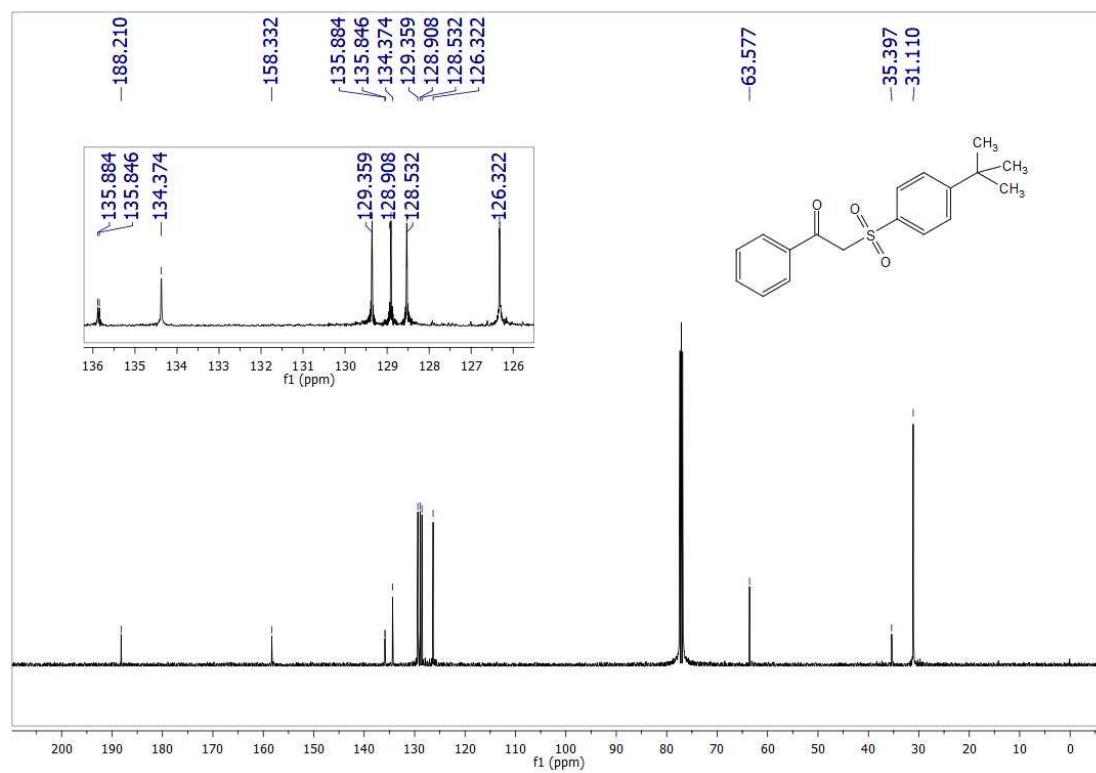

<sup>13</sup>C NMR (126 MHz, CDCl<sub>3</sub>) of compound 44.

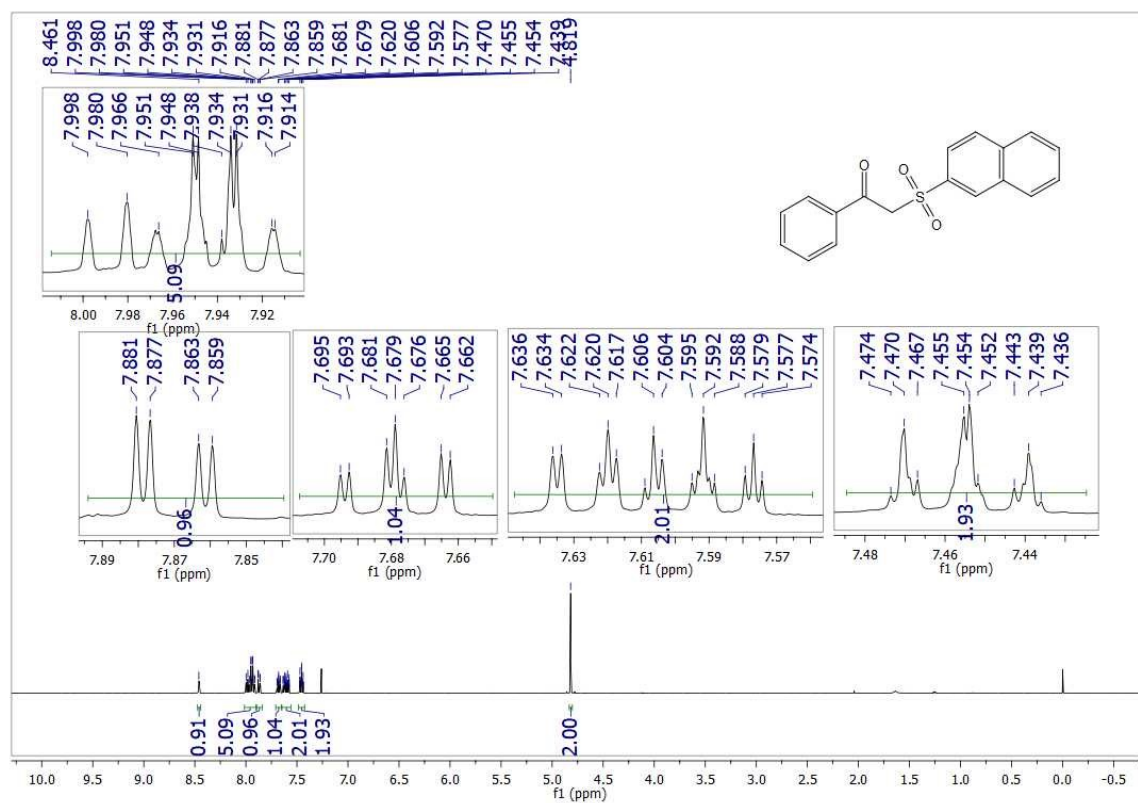

<sup>1</sup>H NMR (500 MHz, CDCl<sub>3</sub>) of compound **45**.

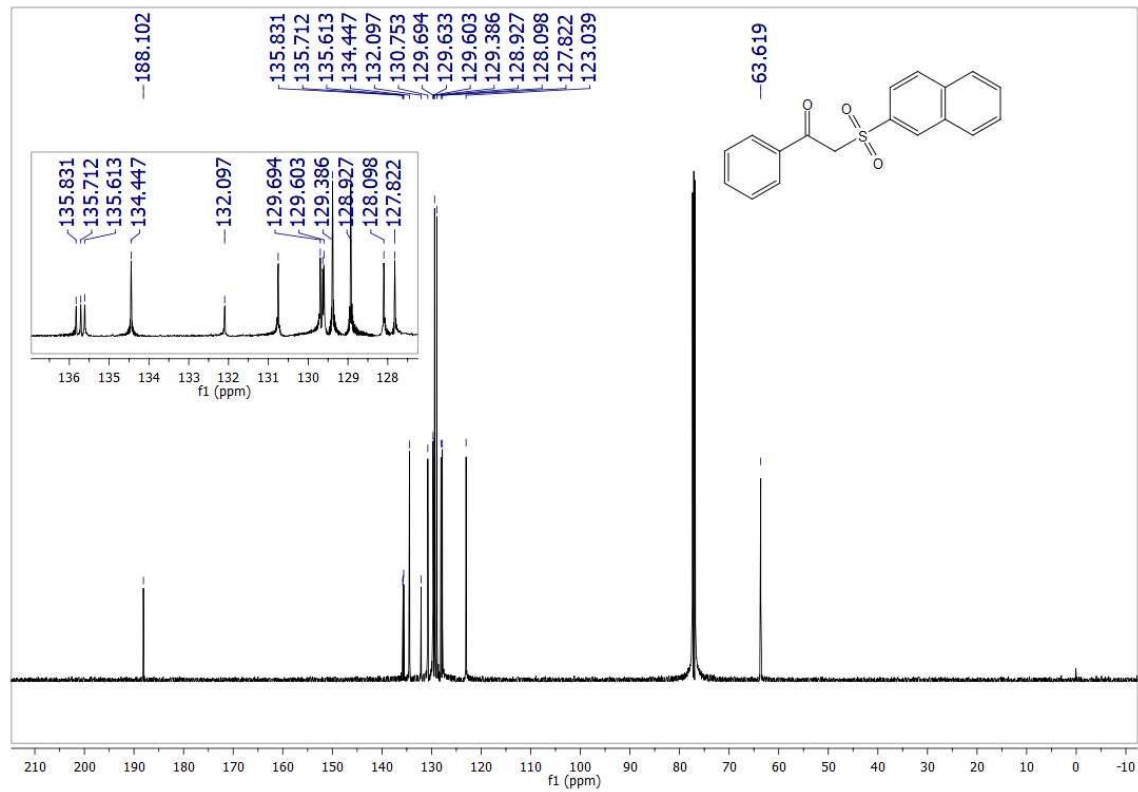

<sup>13</sup>C NMR (126 MHz, CDCl<sub>3</sub>) of compound **45**.

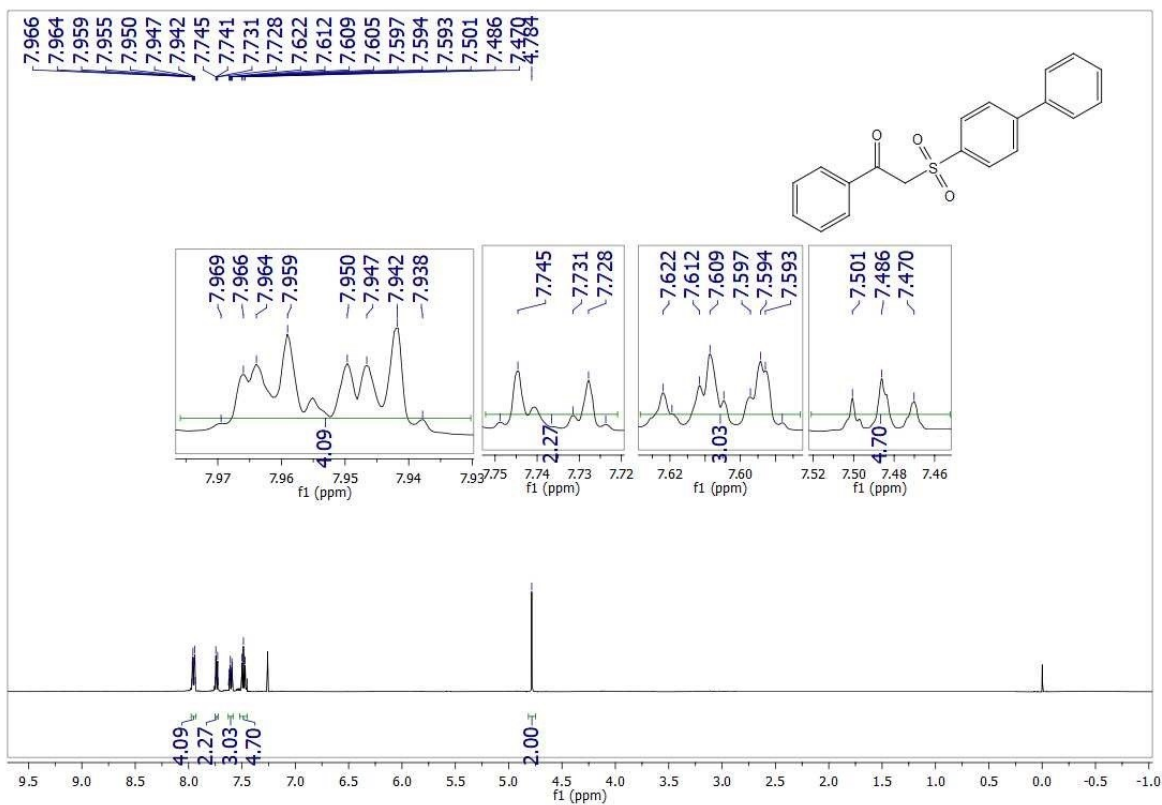

<sup>1</sup>H NMR (500 MHz, CDCl<sub>3</sub>) of compound **46**.

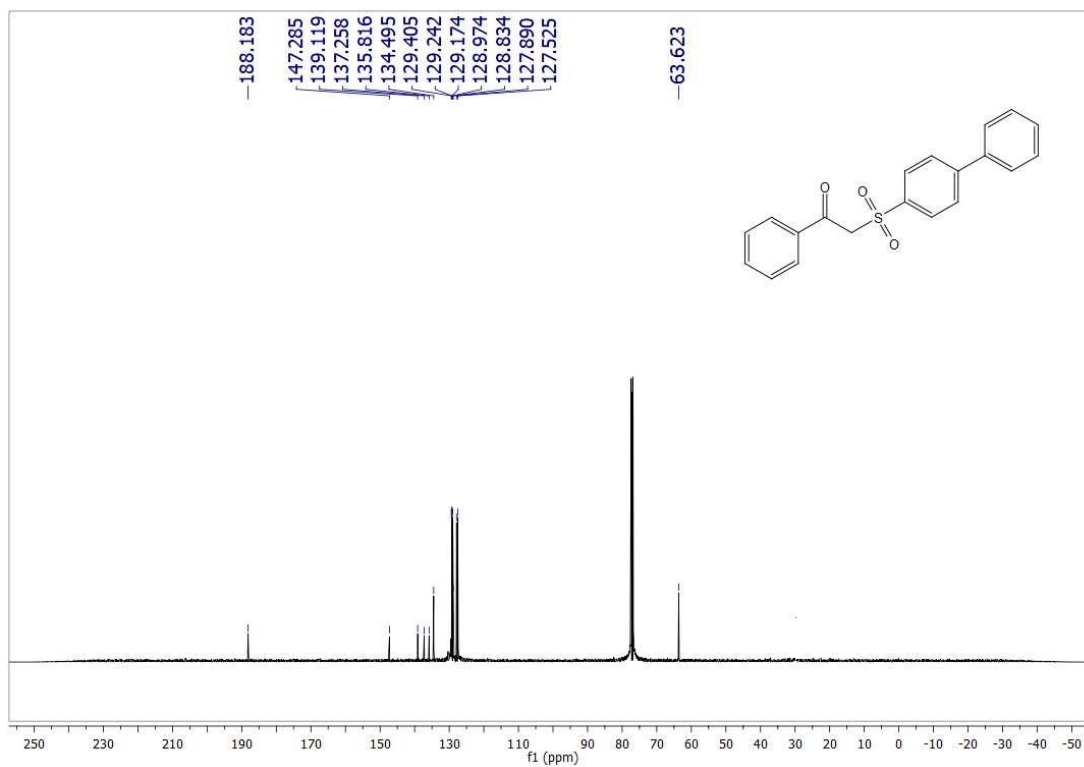

<sup>13</sup>C NMR (126 MHz, CDCl<sub>3</sub>) of compound **46**.

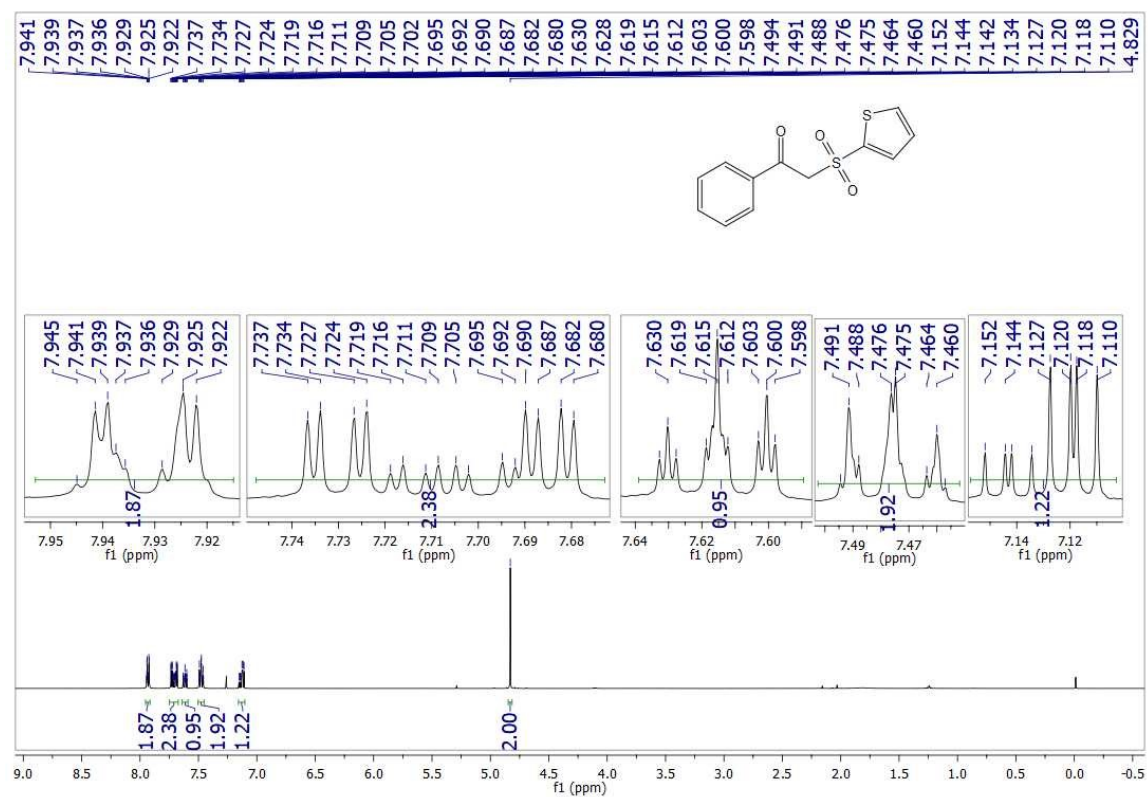

<sup>1</sup>H NMR (500 MHz, CDCl<sub>3</sub>) of compound 47.

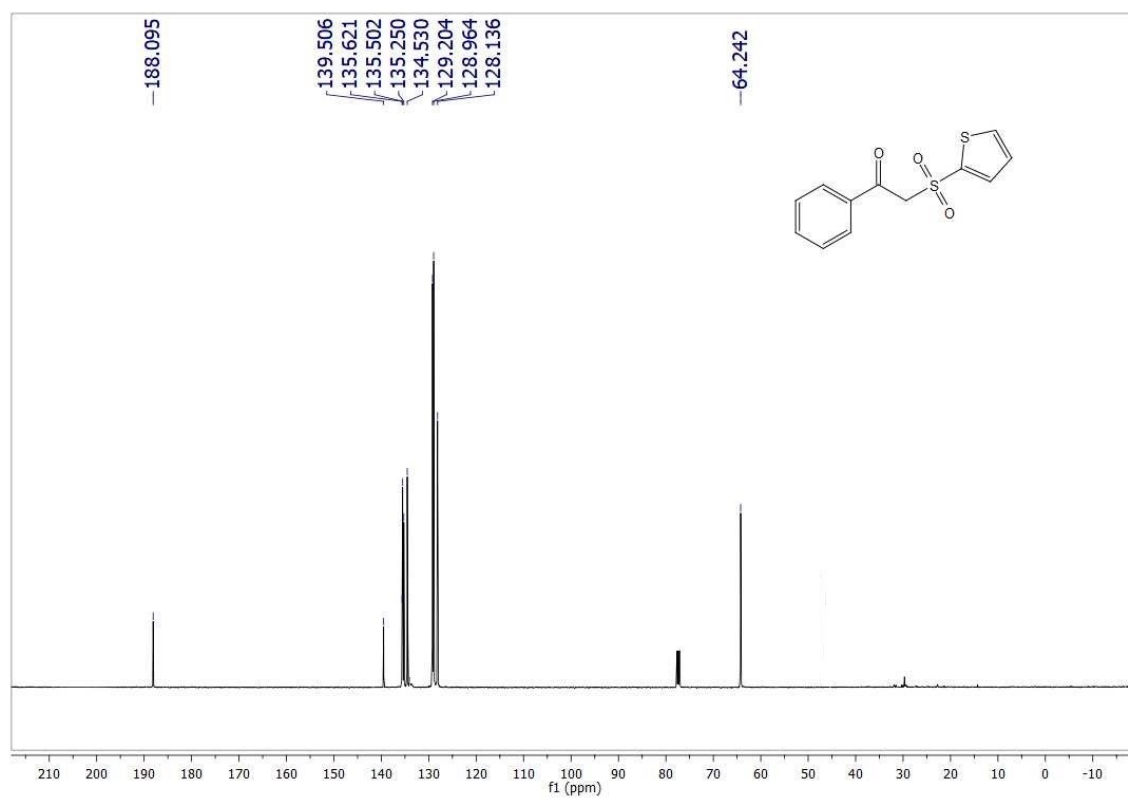

<sup>13</sup>C NMR (126 MHz, CDCl<sub>3</sub>) of compound 47.

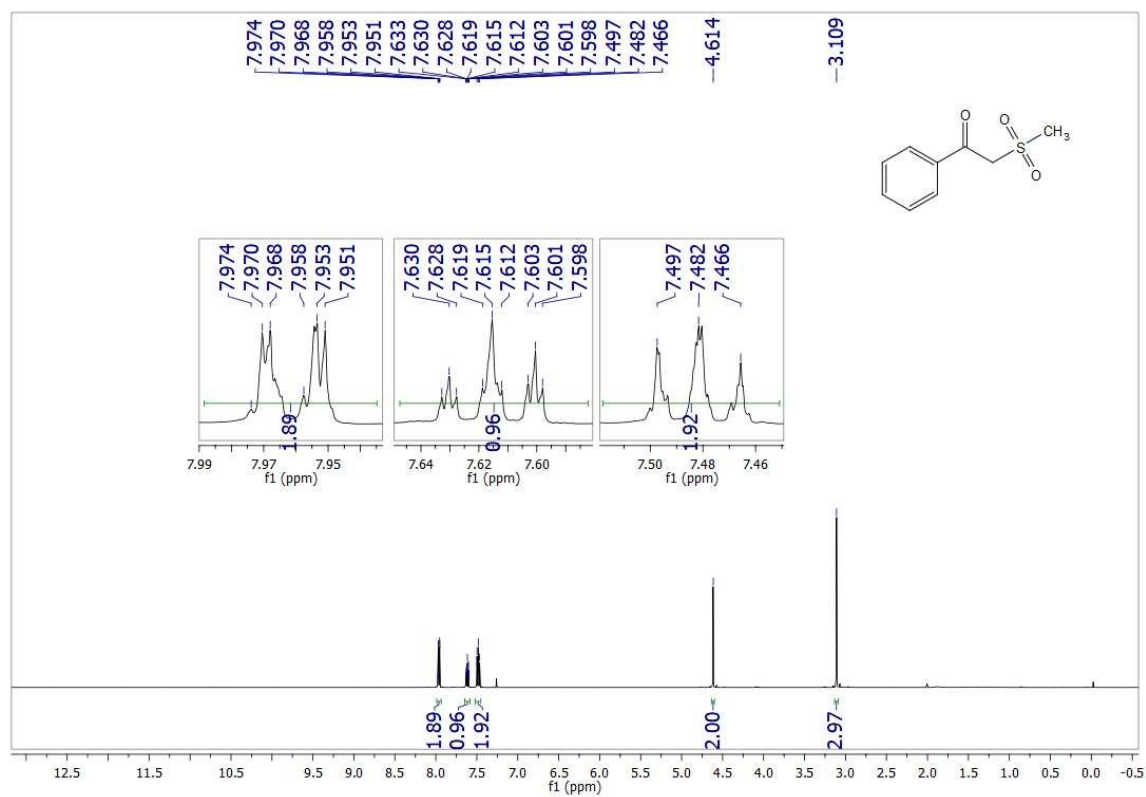

<sup>1</sup>H NMR (500 MHz, CDCl<sub>3</sub>) of compound **48**.

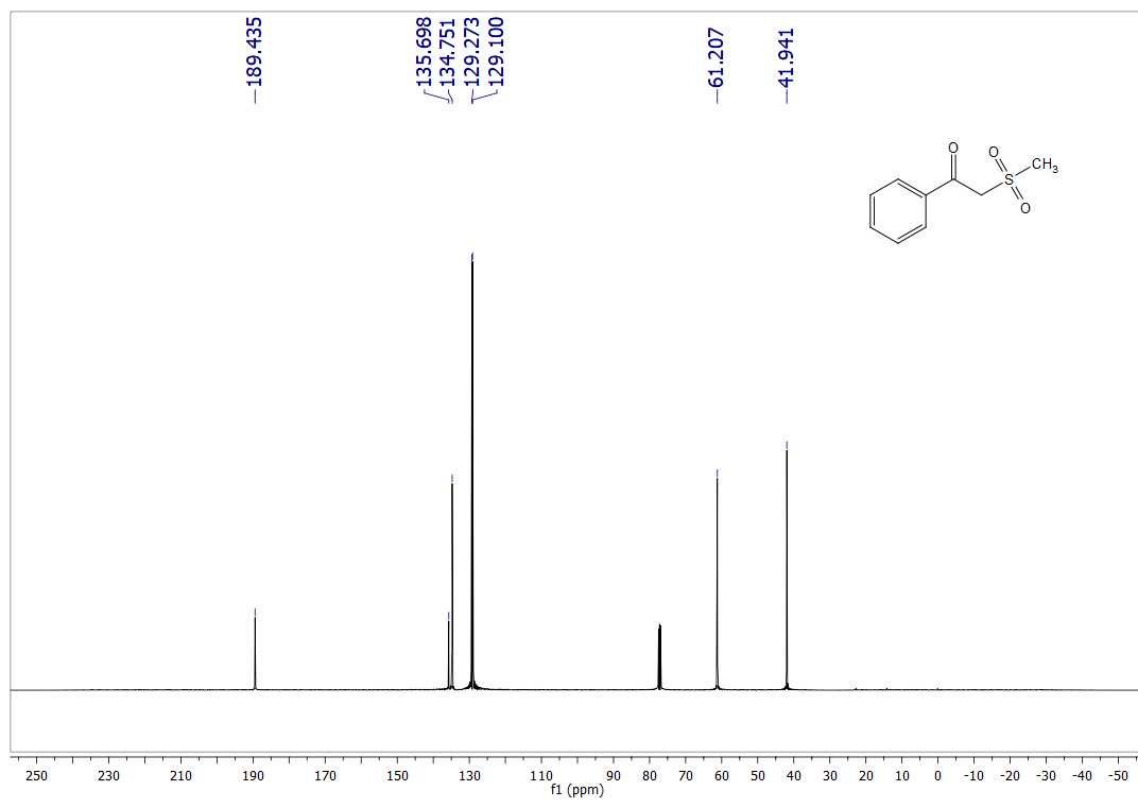

<sup>13</sup>C NMR (126 MHz, CDCl<sub>3</sub>) of compound **48**.



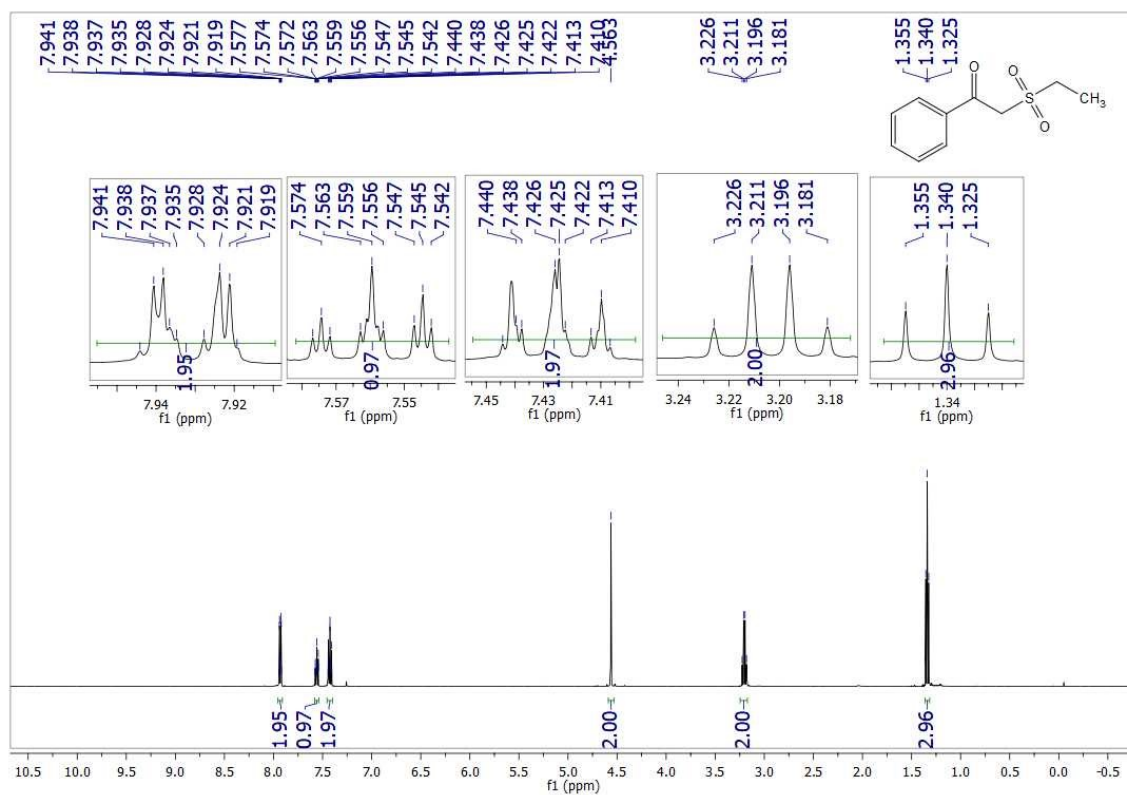

<sup>1</sup>H NMR (500 MHz, CDCl<sub>3</sub>) of compound **49**.

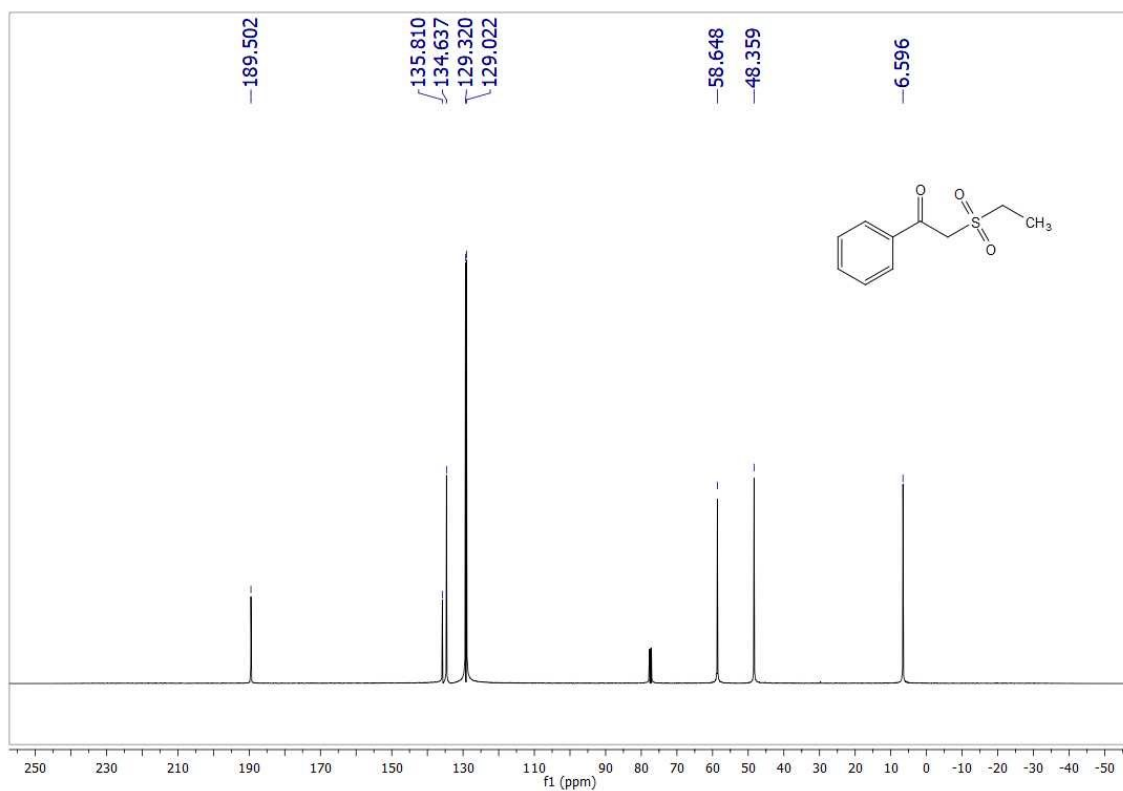

<sup>13</sup>C NMR (126 MHz, CDCl<sub>3</sub>) of compound **49**.

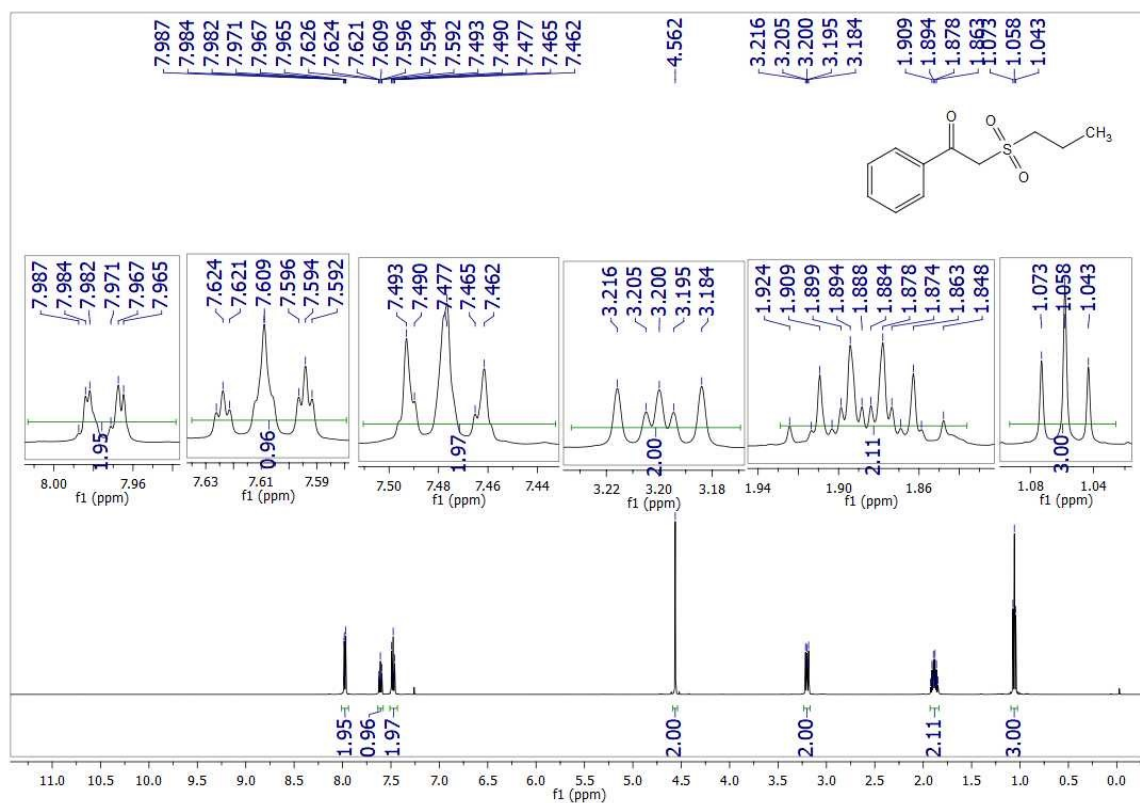

<sup>1</sup>H NMR (500 MHz, CDCl<sub>3</sub>) of compound **50**.

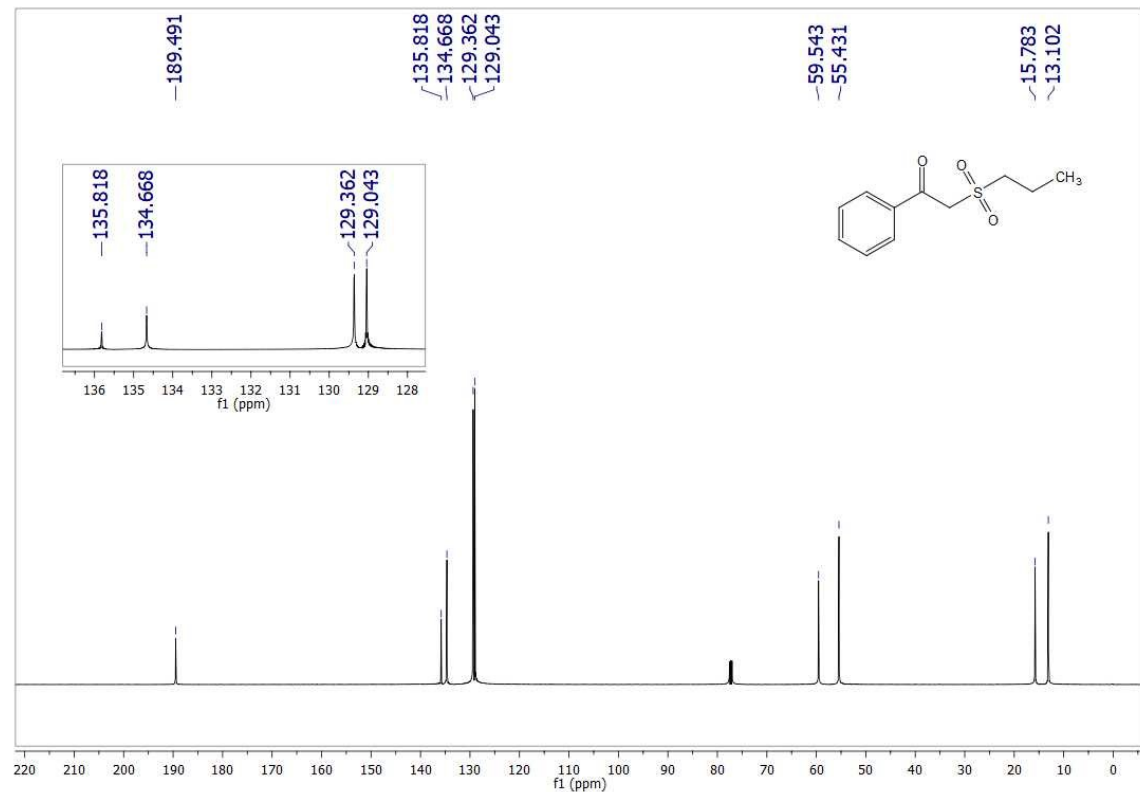

<sup>13</sup>C NMR (126 MHz, CDCl<sub>3</sub>) of compound **50**.



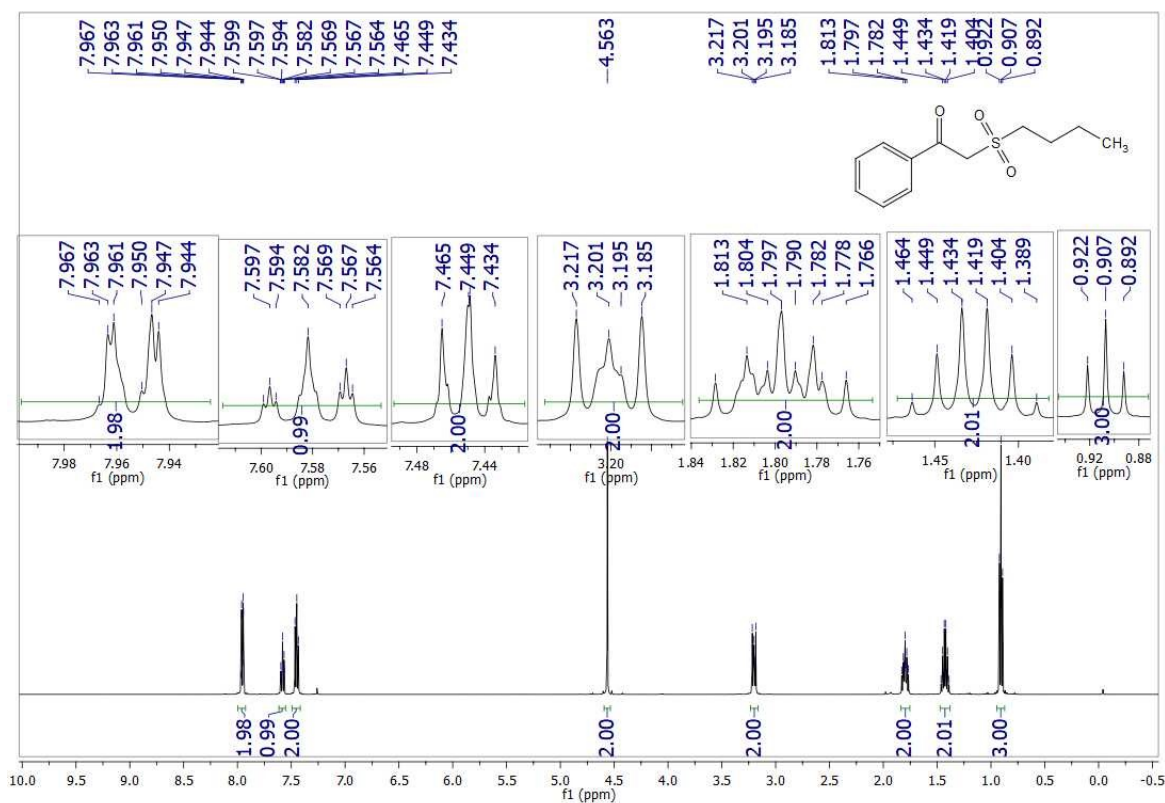

<sup>1</sup>H NMR (500 MHz, CDCl<sub>3</sub>) of compound **51**.

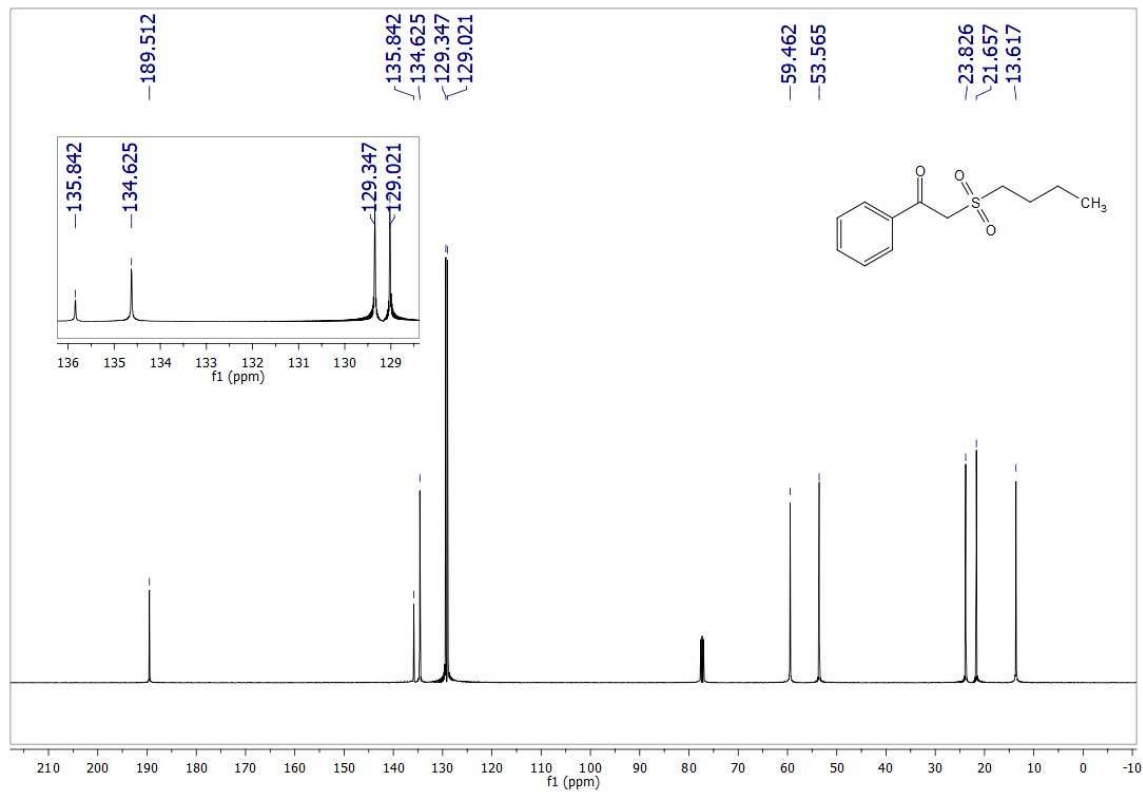

<sup>13</sup>C NMR (126 MHz, CDCl<sub>3</sub>) of compound **51**.

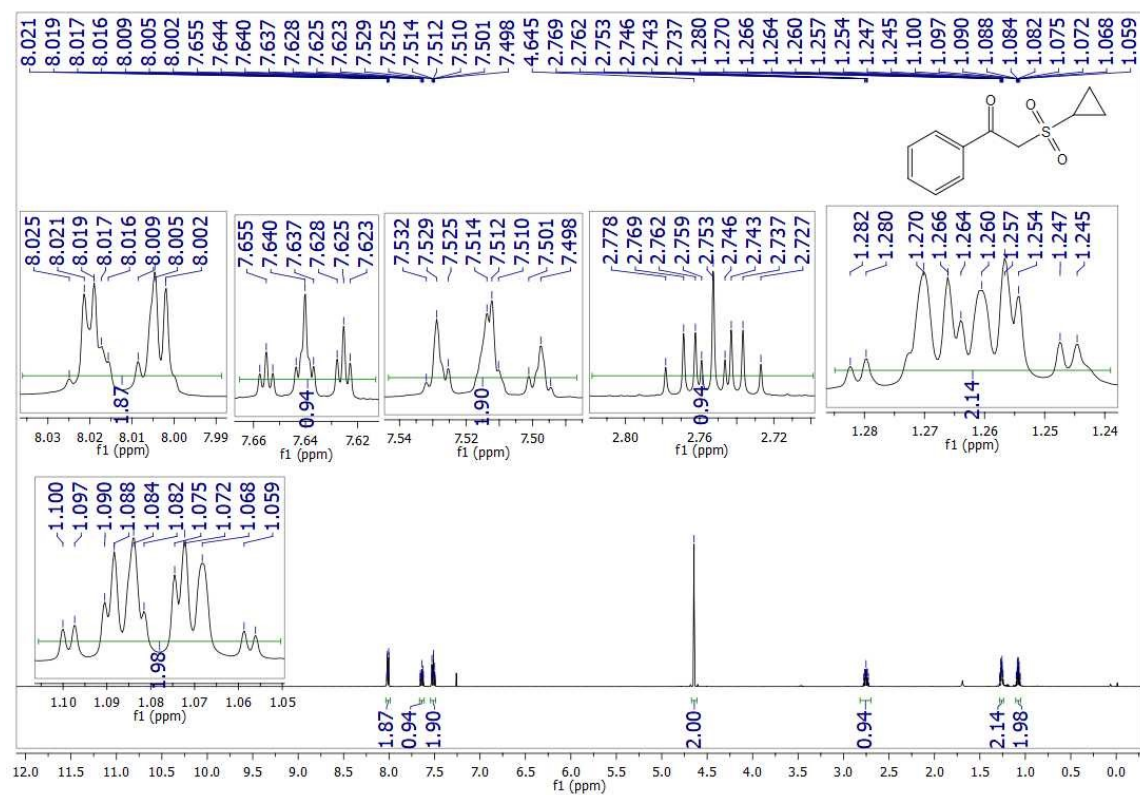

<sup>1</sup>H NMR (500 MHz, CDCl<sub>3</sub>) of compound **52**.

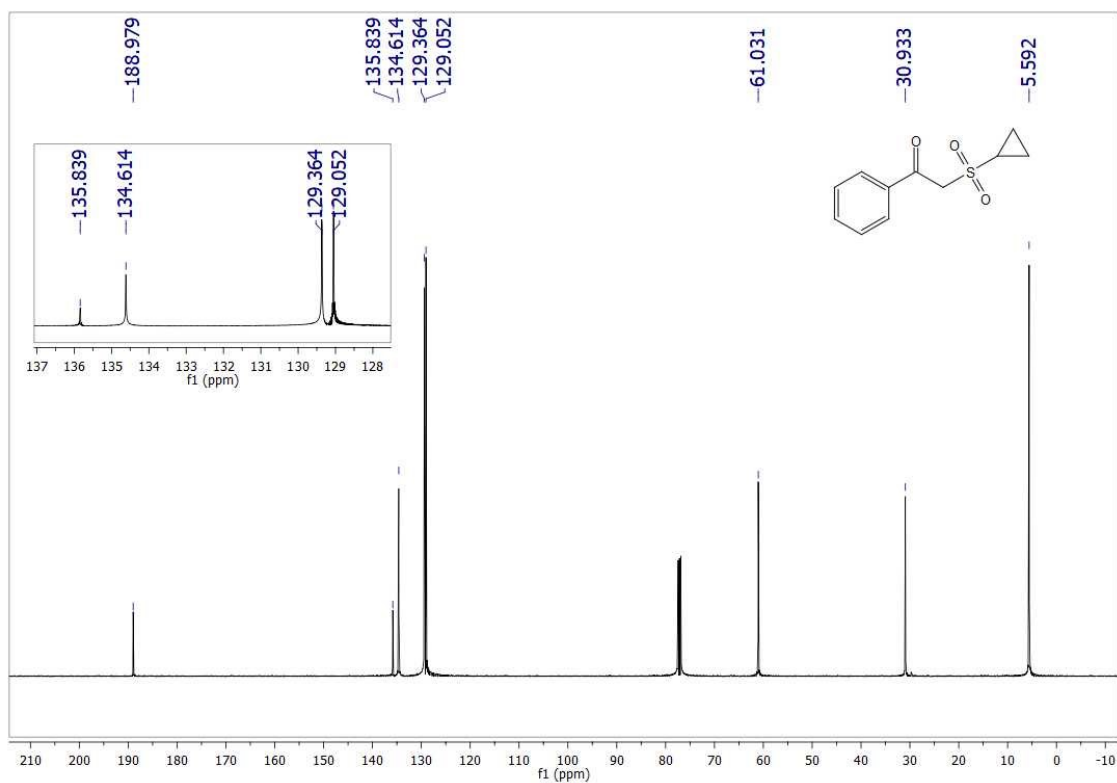

<sup>13</sup>C NMR (126 MHz, CDCl<sub>3</sub>) of compound **52**.

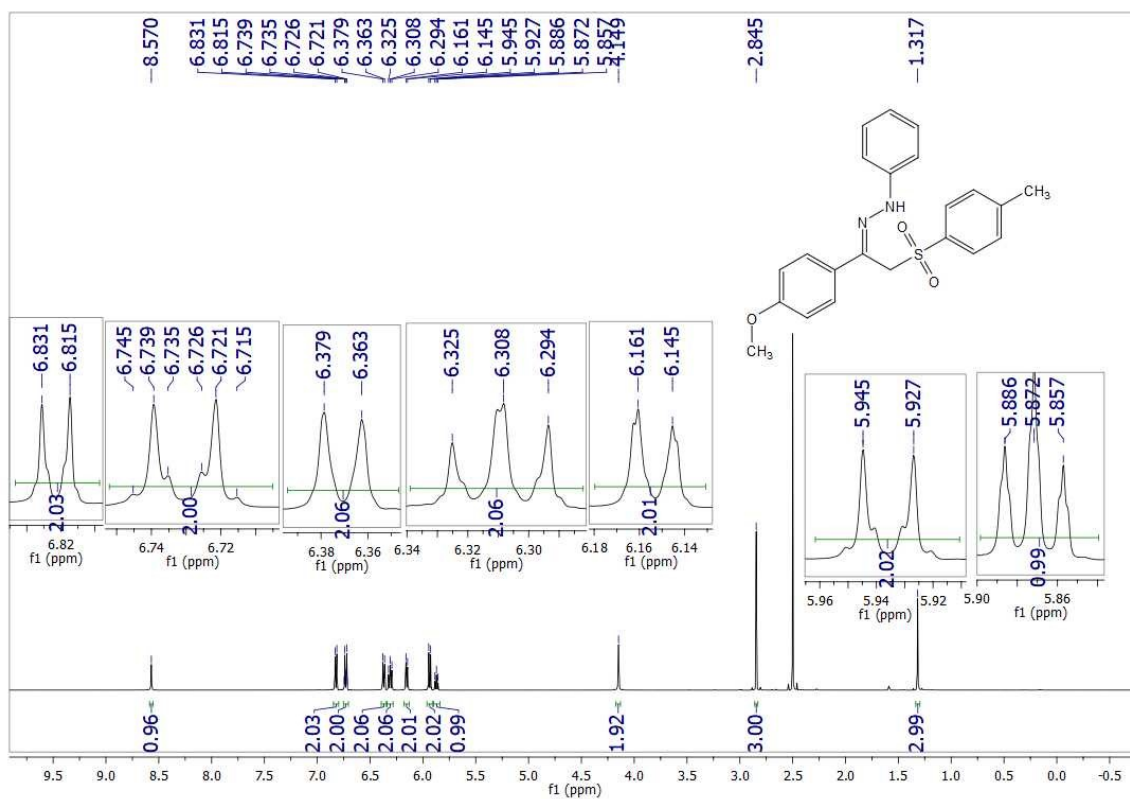

<sup>1</sup>H NMR (500 MHz, DMSO -d<sub>6</sub>) of compound **53**.

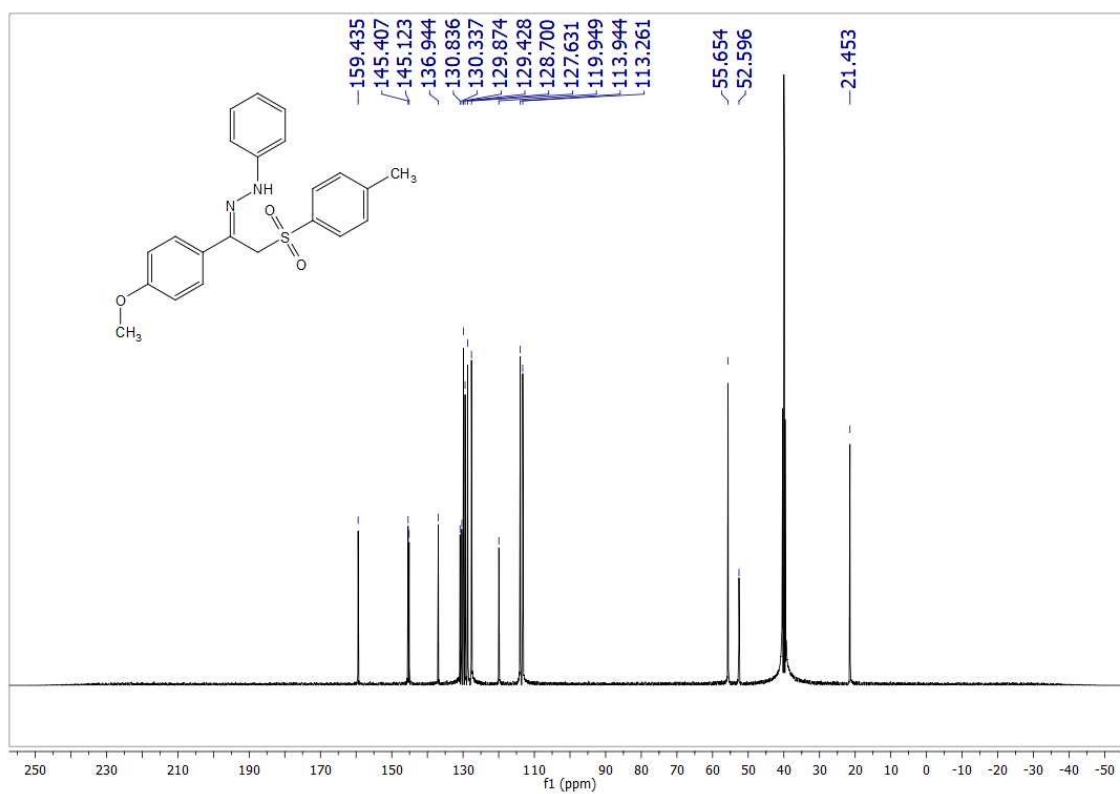

<sup>13</sup>C NMR (126 MHz, DMSO -d<sub>6</sub>) of compound **53**.

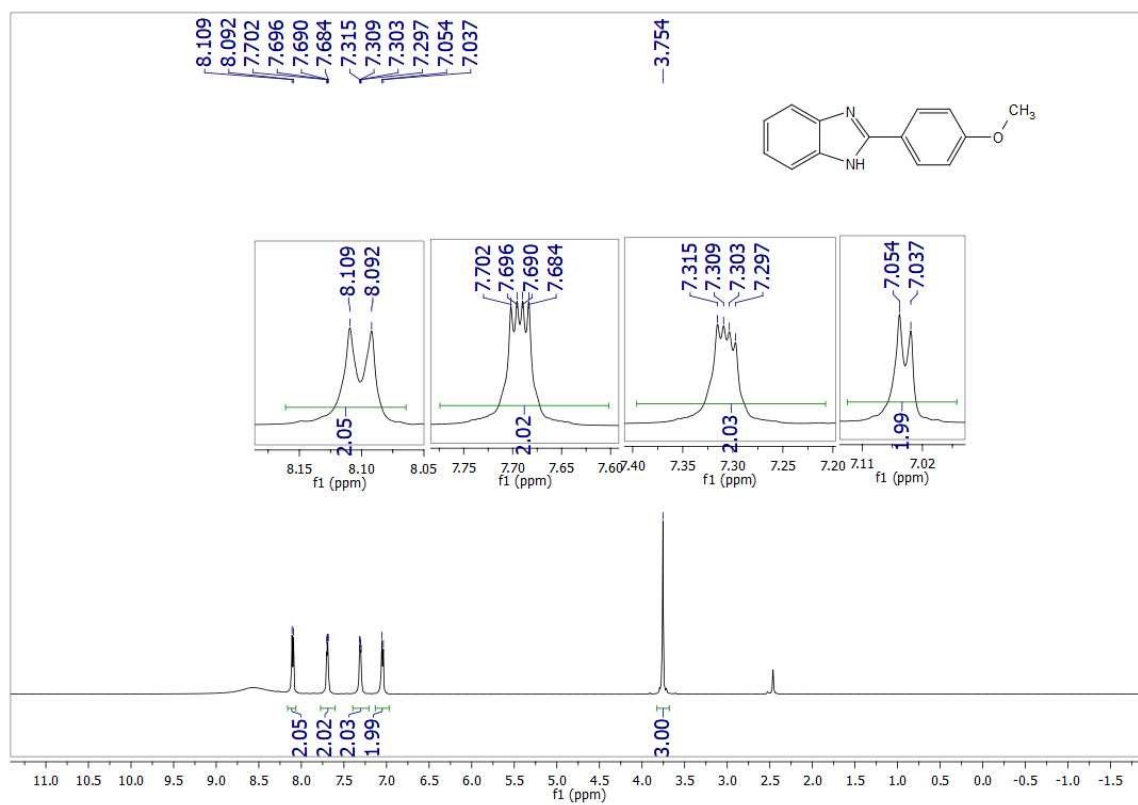

<sup>1</sup>H NMR (500 MHz, DMSO -d<sub>6</sub>) of compound **54**.

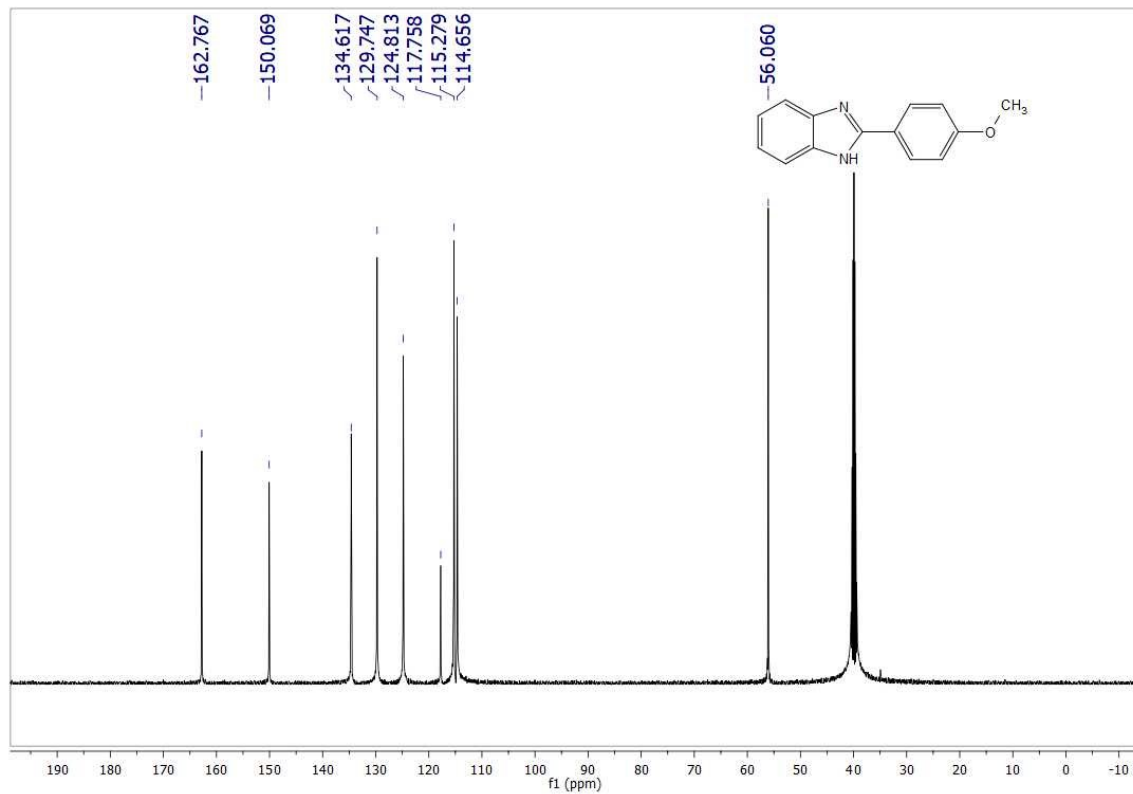

<sup>13</sup>C NMR (126 MHz, DMSO -d<sub>6</sub>) of compound **54**.

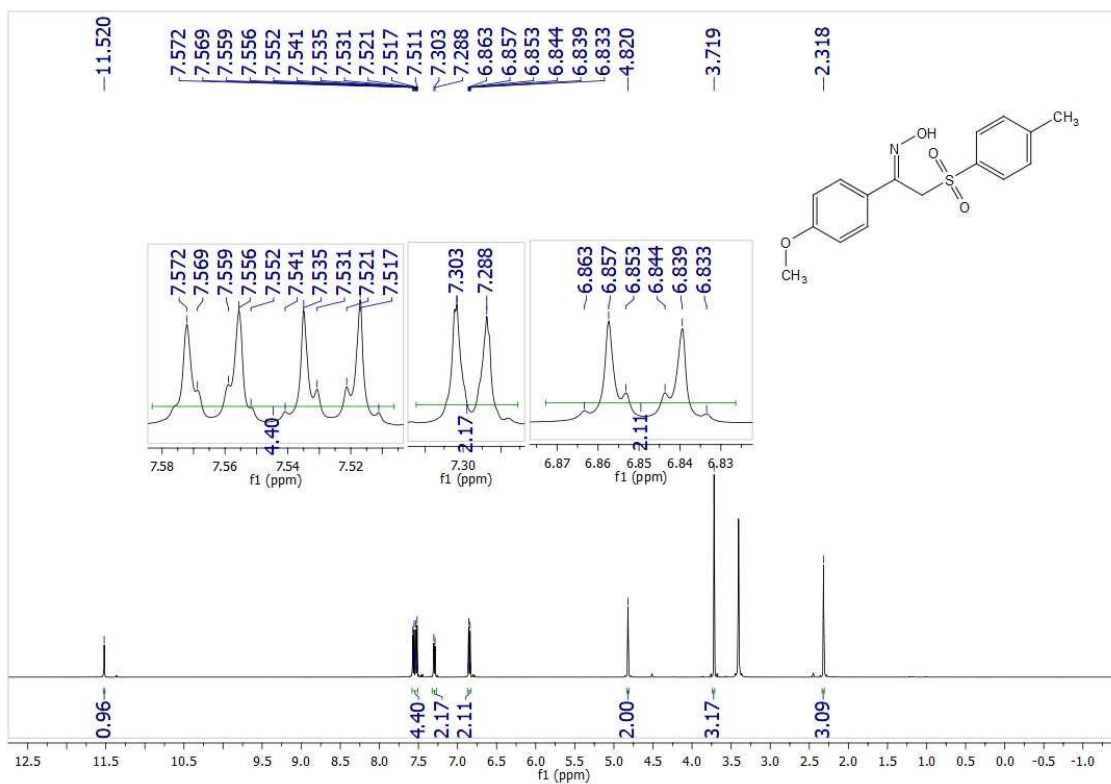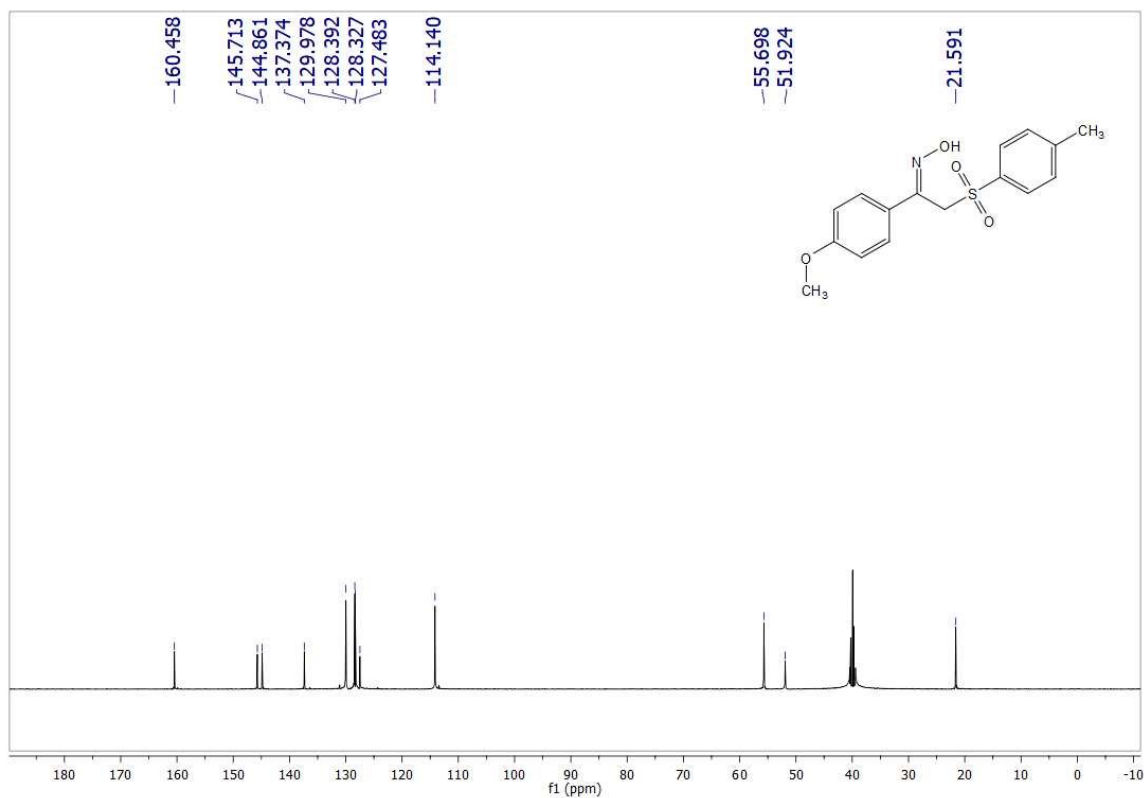



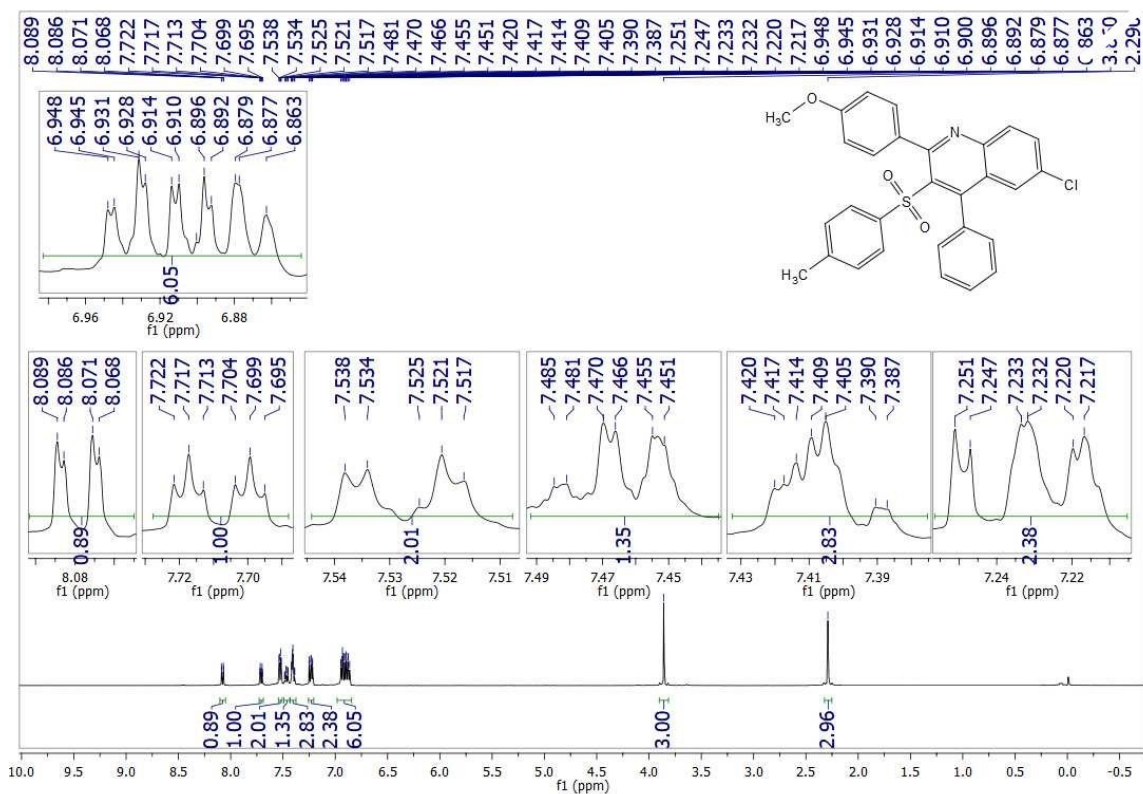

<sup>1</sup>H NMR (500 MHz, CDCl<sub>3</sub>) of compound **56**.

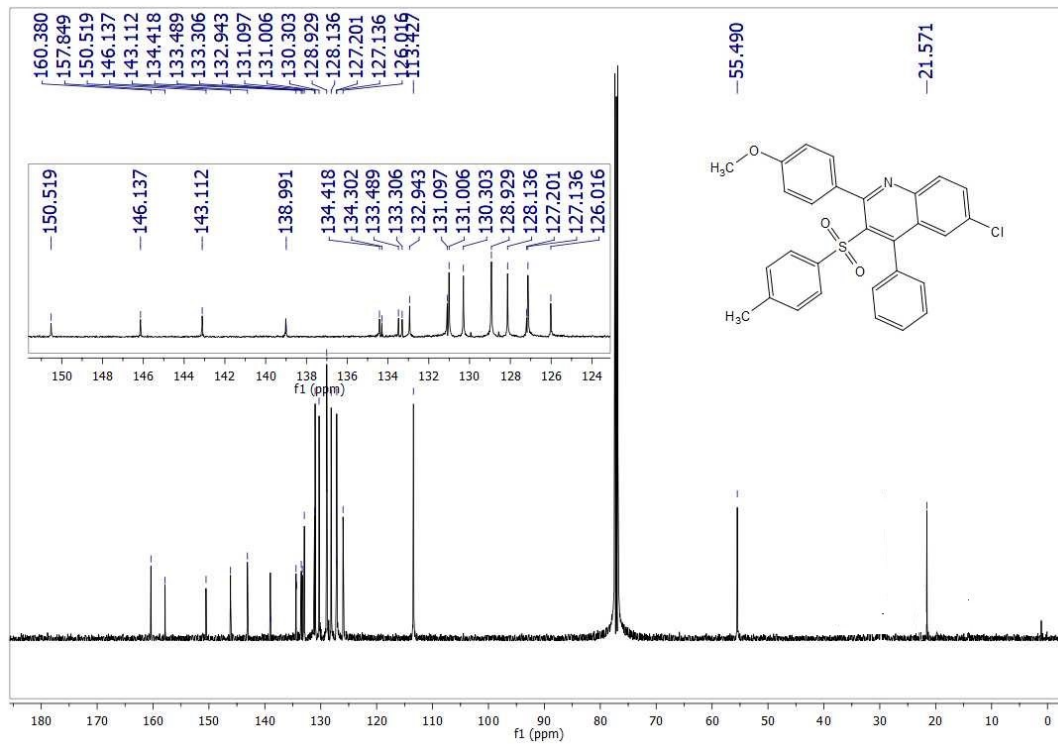

<sup>13</sup>C NMR (126 MHz, CDCl<sub>3</sub>) of compound **56**.

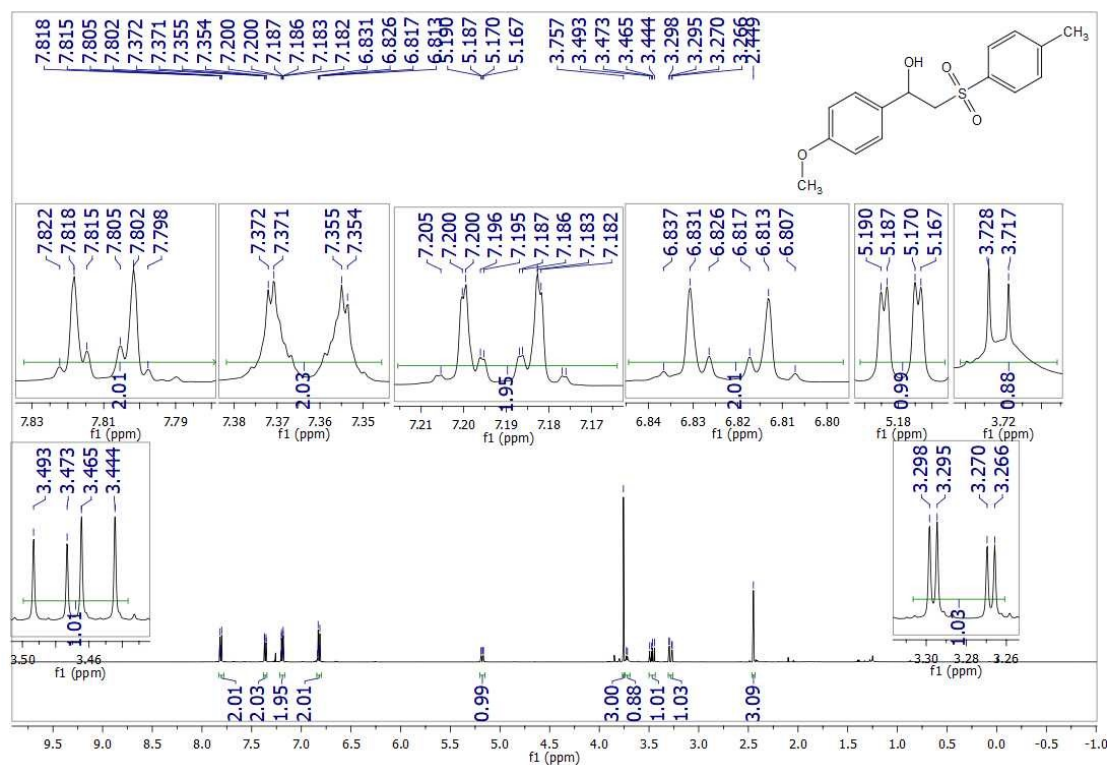

<sup>1</sup>H NMR (500 MHz, CDCl<sub>3</sub>) of compound 57.

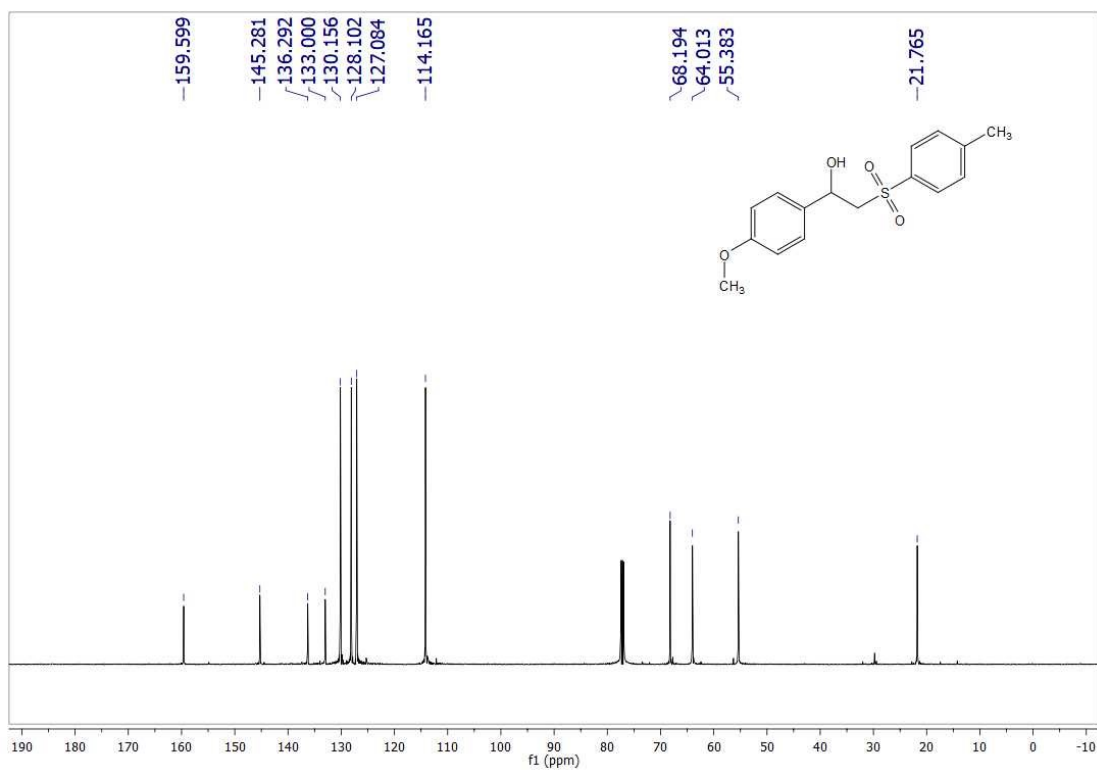

<sup>13</sup>C NMR (126 MHz, CDCl<sub>3</sub>) of compound 57.

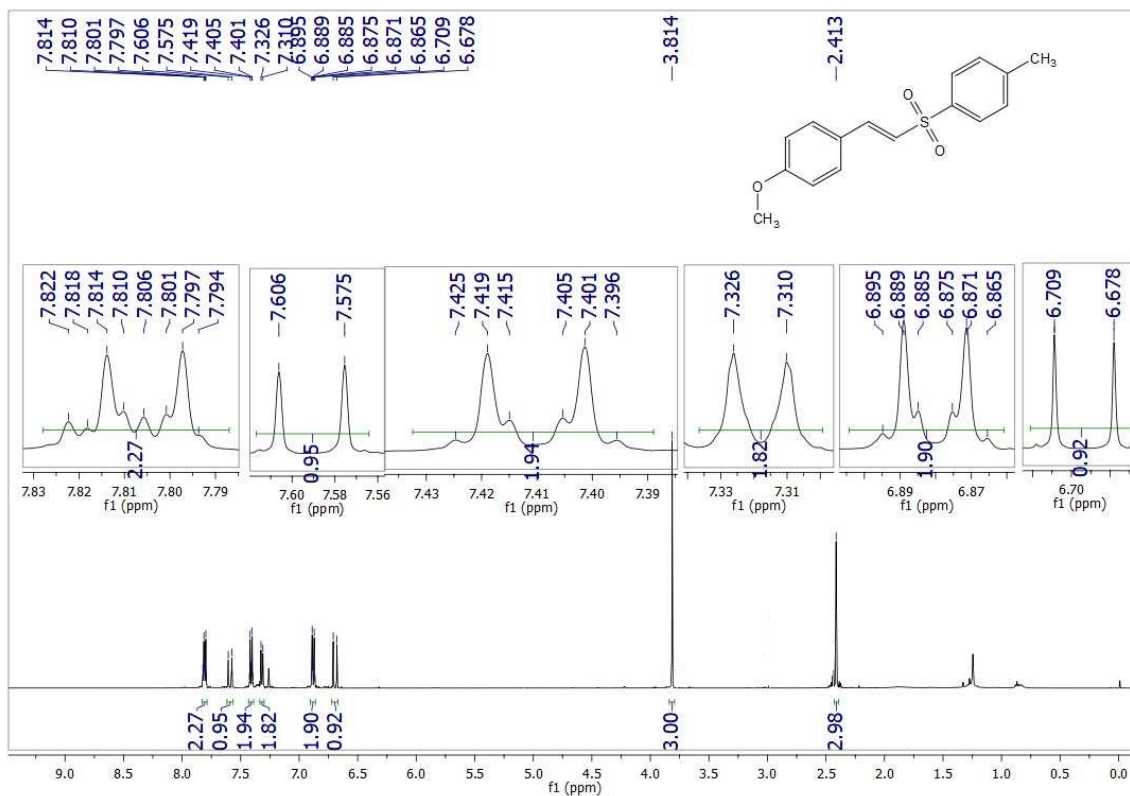

<sup>1</sup>H NMR (500 MHz, CDCl<sub>3</sub>) of compound **58**.

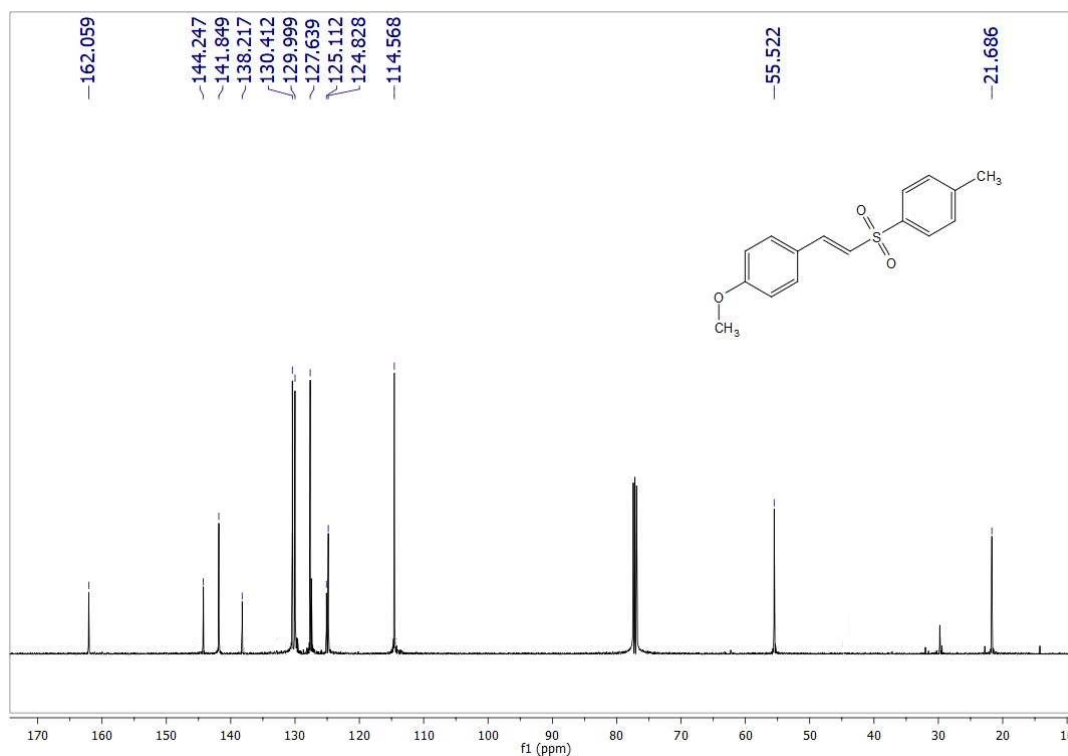

<sup>13</sup>C NMR (126 MHz, CDCl<sub>3</sub>) of compound **58**.



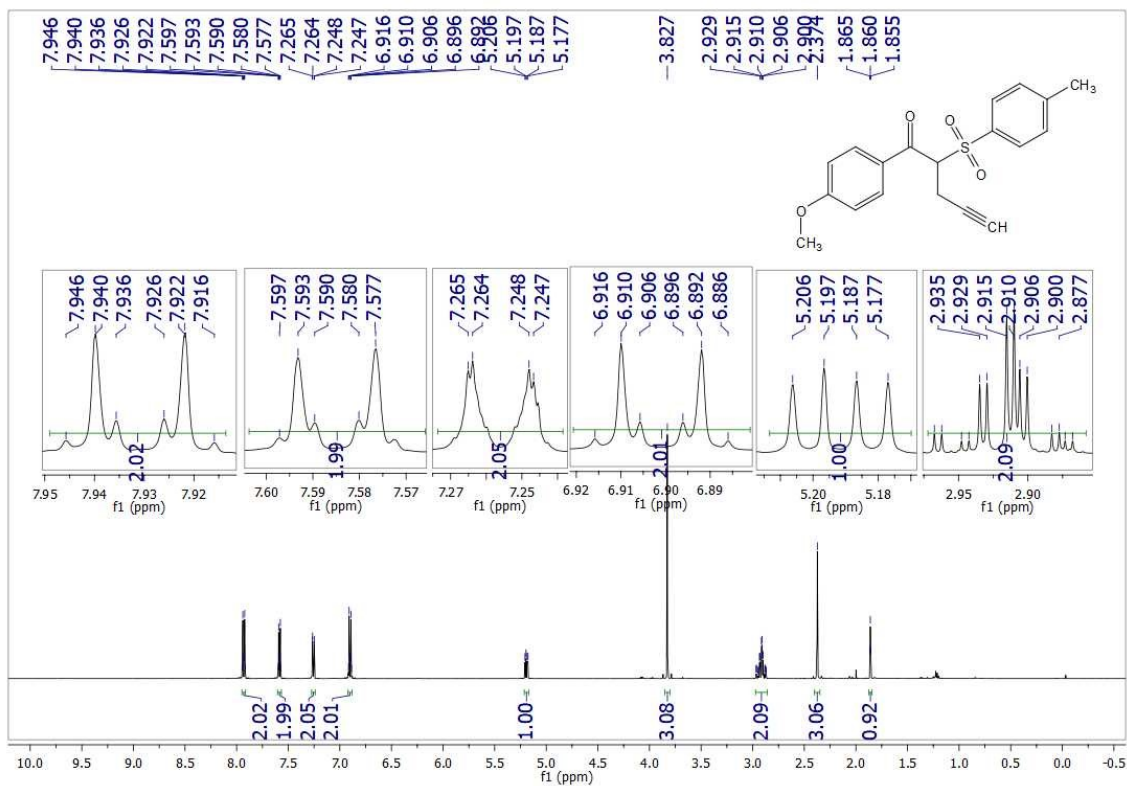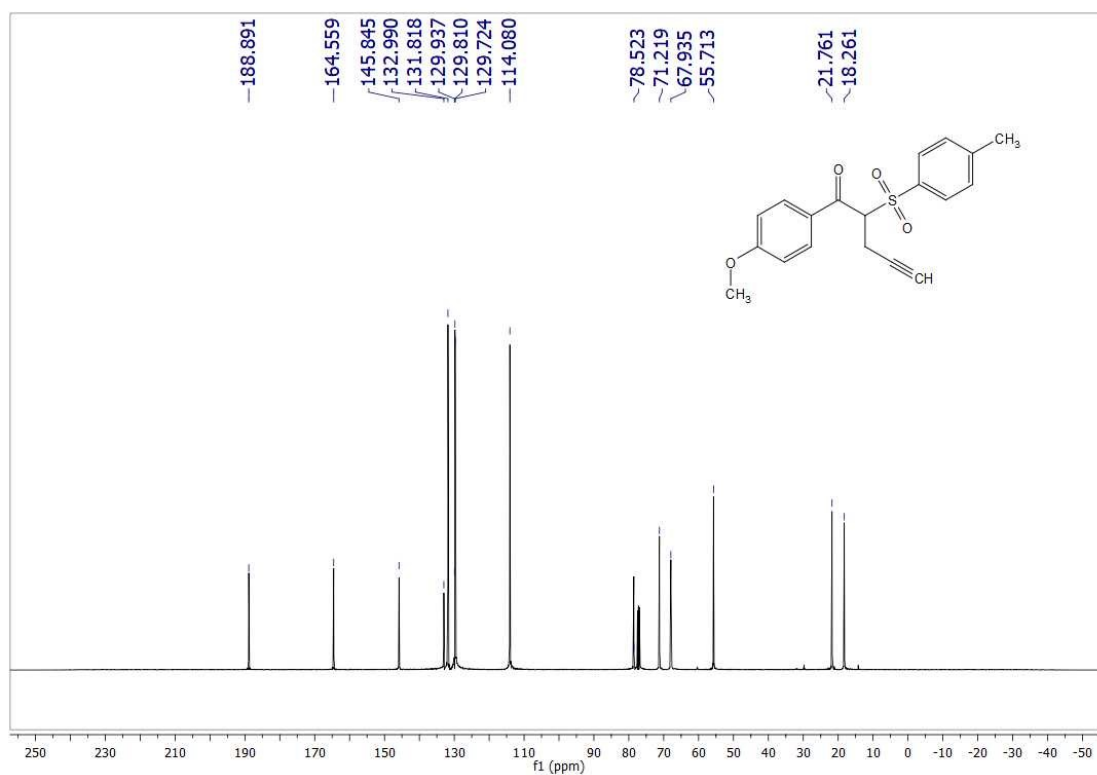

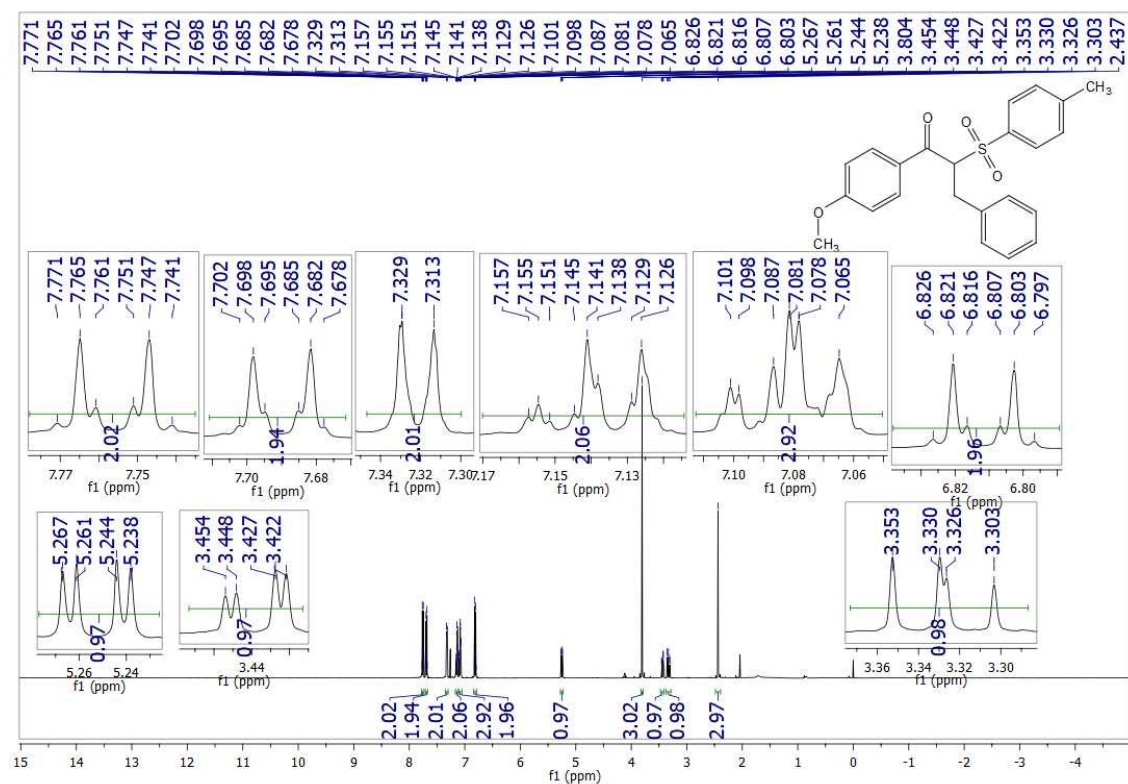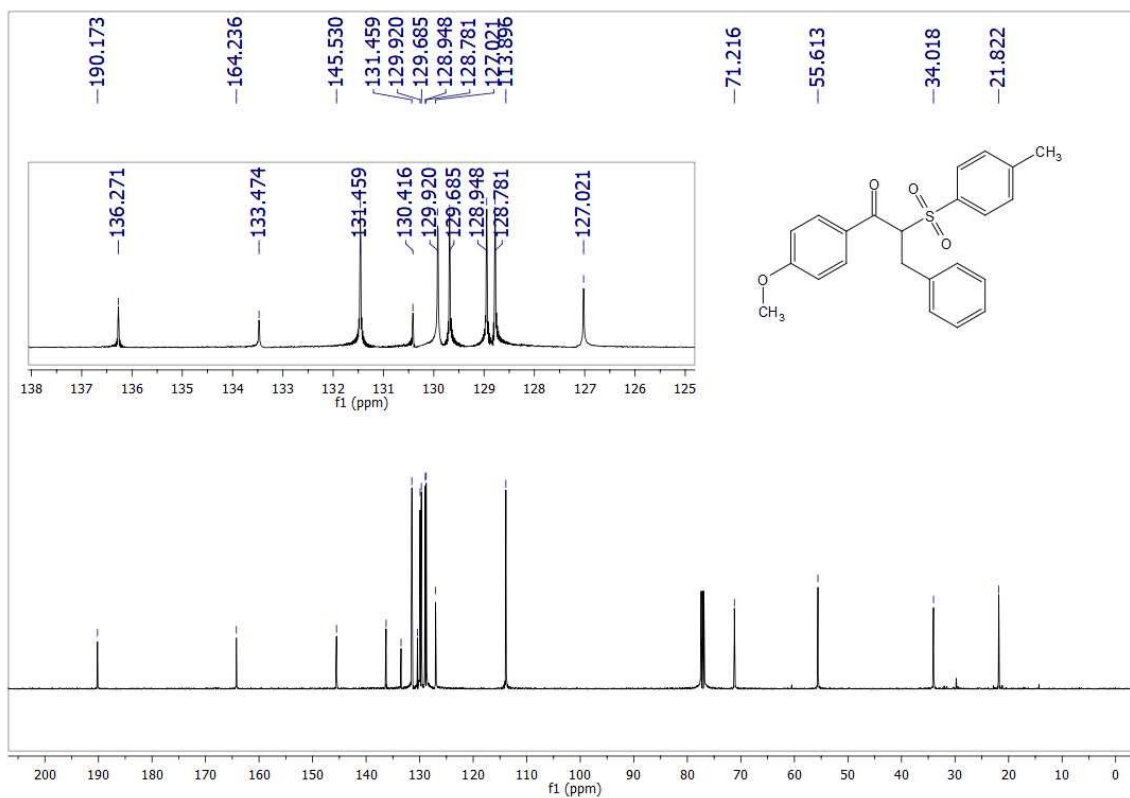

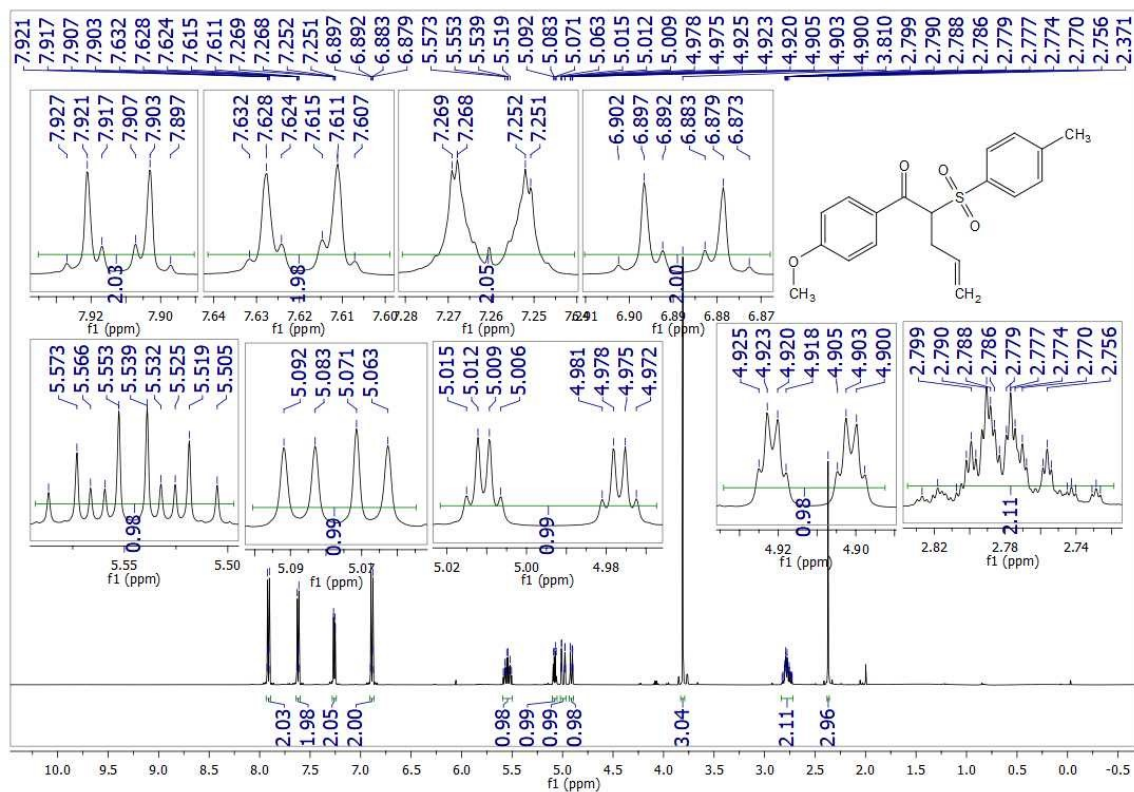

<sup>1</sup>H NMR (500 MHz, CDCl<sub>3</sub>) of compound **61**.

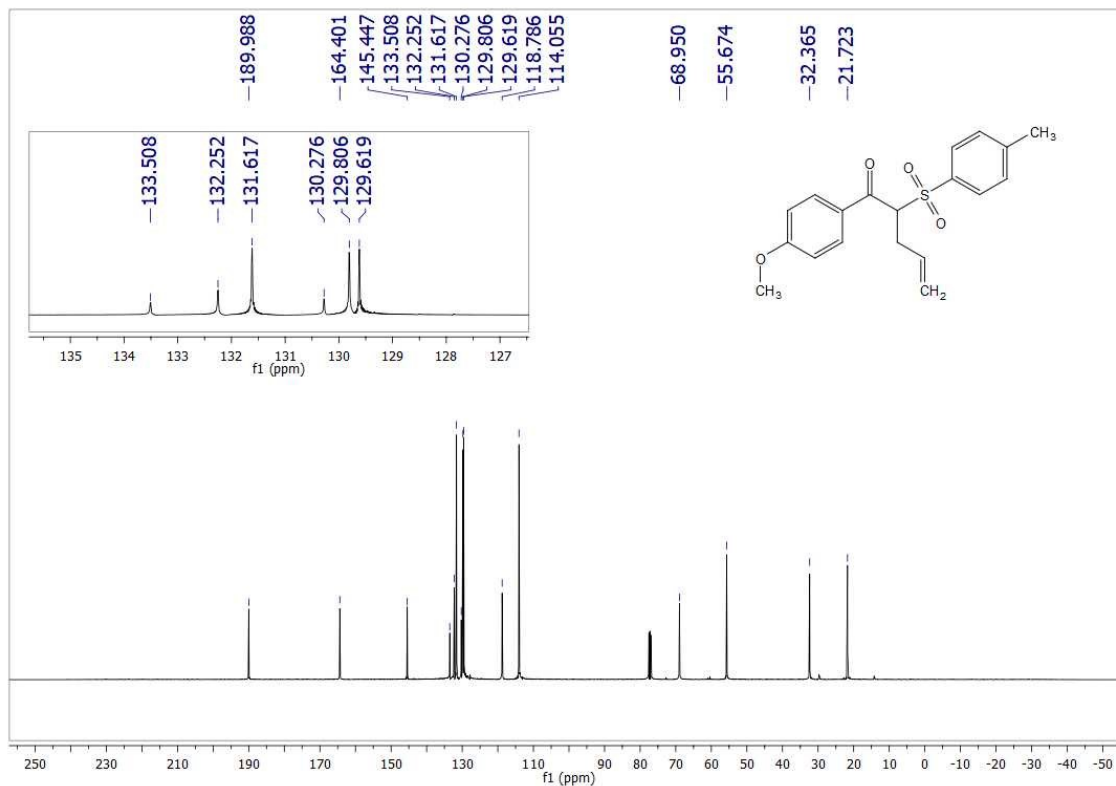

<sup>13</sup>C NMR (126 MHz, CDCl<sub>3</sub>) of compound **61**.

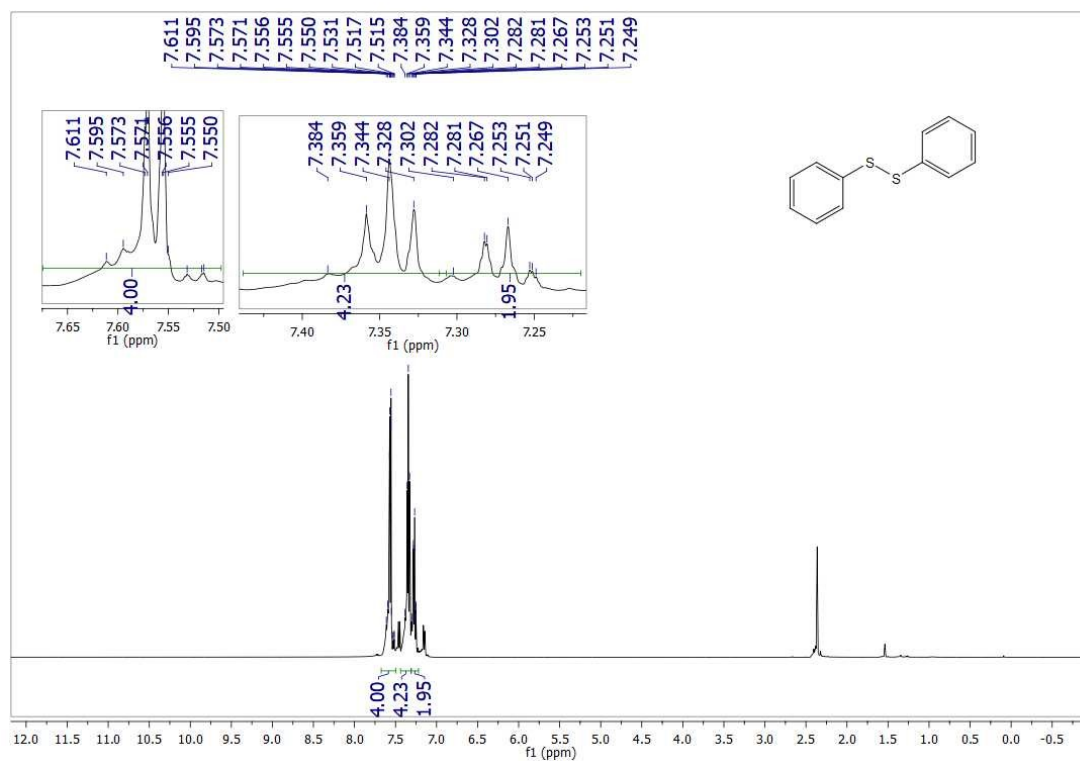

<sup>1</sup>H NMR (500 MHz, CDCl<sub>3</sub>) of **1,2-diphenyldisulfane**.

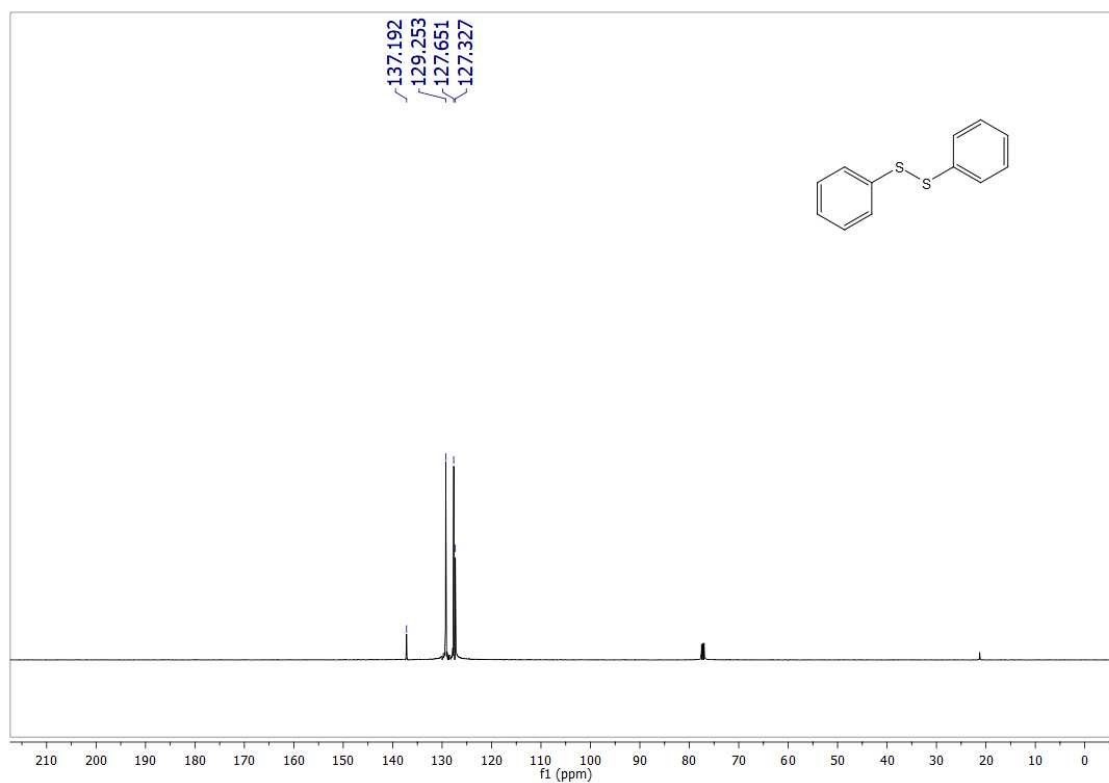

<sup>13</sup>C NMR (126 MHz, CDCl<sub>3</sub>) of **1,2-diphenyldisulfane**.

## 9. References

1. (a) H. Cao, S. Ma, Y. Feng, Y. Guo and P. Jiao, *Chem. Commun.*, 2022, **58**, 1780-1783; (b) Y. Hu, Y. Li, S. Zhang, C. Li, L. Li, Z. Zha, and Z. Wang, *Org. Lett.*, 2015, **17**, 4018-4021; (c) I. Khan, B. G. Reed-Berendt, R. L. Melen, and L. C. Morrill, *Angew. Chem. Int. Ed.*, 2018, **57**, 12356-12359; (d) R. Doi, K. Kajiwarra, T. Negoro, K. Koh and S. Ogoshi, *Org. Lett.*, 2023, **25**, 5542-5547; (e) X. Kou and K. G. M. Kou, *ACS Catal.*, 2020, **10**, 3103-3109.
2. (a) X. Kou and K. G. M. Kou, *ACS Catal.*, 2021, **11**, 11510; (b) K. Maji, P. R. Thorve, P. Raia and B. Maji, *Chem. Commun.*, 2022, **58**, 9516-9519.
3. R. Ma, Z. Deng, K.-H. Wang, J. Wang, D. Huang, Y. Su, Y. Hu and X. Lv, *ACS Omega.*, 2022, **7**, 14357-14362.
4. (a) G. Bogonda, D. V. Patil, H. Y. Kim, K. Oh, *Org. Lett.*, 2019, **21**, 3774-3779; (b) Y. Fang, T. Rogge, L. Ackermann, S.-Y. Wang and S.-J. Ji, *Nat Commun.*, 2018, **9**, 2240; (c) Z. Xuna, L. Tong-Xin and Z. Guisheng, *Asian J. Org. Chem.*, 2017, **6**, 677-681.
5. H. A. Benesi, J. Hildebrand, *J. Am. Chem. Soc.*, 1949, **71**, 2703-2707.
6. C. G. Hatchard, C. A. Parker, *Proc. R. Soc. (London)*, 1956, **235**, 518-536.
7. M. Montalti, A. Credi, L. Prodi, M. T. Gandolfi, *Handbook of Photochemistry*, Taylor Francis, 2006.
8. (a) N. Mukherjee and T. Chatterjee, *Green Chem.*, 2021, **23**, 10006-10013; (b) A. N. V. Satyanarayana, N. Mukherjee and T. Chatterjee, *Green Chem.*, 2023, **25**, 779-788; (c) K. Van Aken, L. Strekowski, L. Patiny, *Beilstein J. Org. Chem.*, 2006, **2**, 3; (d) A. Beillard, X. Bantreil, T.-X. Métro, J. Martinez and F. Lamaty, *Green Chem.*, 2018, **20**, 964-968; (e) B. Saxena, R. I. Patel, S. Sharma and A. Sharma, *Green Chem.*, 2024, **26**, 2721-2729.
9. (a) X. Wang, Y. Kuang, S. Ye and J. Wu, *Chem. Commun.*, 2019, **55**, 14962-14964; (b) F.-S. He, Y. Yao, W. Xie and Jie Wu, *Chem. Commun.*, 2020, **56**, 9469-9472; (c) F.-S. He, P. Bao, Z. Tang, F. Yu, W.-P. Deng, and Jie Wu, *Org. Lett.*, 2022, **24**, 2955-2960.
10. (a) V. K. K. Pampana, V. P. Charpe, A. Sagadevan, D. K. Das, C.-C. Lin, J. R. Hwu and K. C. Hwang, *Green Chem.*, 2021, **23**, 3569-3574; (b) B. Dam, A. K. Sahoo and B. K. Patel, *Green Chem.*, 2022, **24**, 7122-7130. (c) W.-H. Rao, C. Gao, L.-L. Jiang, F.-Y. Zhou, J.-F. Liu, and G.-D. Zou, *J. Org. Chem.*, 2024, <https://doi.org/10.1021/acs.joc.4c01660>; (d) C. Liu, Z. Liang, A. Jialingbieke, J. Gao, and D. Du, *Org. Lett.*, 2023, **25**, 2657-2662; (e) R. Chen, Y. Tang, X. He, K.-K. Wang, L. Ding, and L. Liu, *Org. Lett.*, 2023, **25**, 5454-545; (f) J. Xu, C. Shen, X. Qin, J. Wu, P. Zhang, and X. Liu, *J. Org. Chem.*, 2021, **86**, 3706-3720; (g) S. Handa, J. C. Fennwald, B. H. Lipshutz, *Angew. Chem. Int. Ed.*, 2014, **53**, 3432-3435.
11. H. A. A. Aziz, K. A. A. Rashood, K. H. El-Tahir and G. M. Suddek, *Eur. J. Med. Chem.*, 2014, **80**, 416-422.
12. M.-Y. Chang, C.-K. Chan and Y.-C. Chen, *Heterocycles*, 2014, **89**, 1237.
13. C.-K. Chan, C.-Y. Lai, W.-C. Lo, Y.-T. Cheng, M.-Y. Chang and C.-C. Wang, *Org. Biomol. Chem.*, 2020, **18**, 305-315.
14. (a) Y.-S. Lin, Y.-C. Kuo, C.-H. Kuei, M.-Y. Chang, *Tetrahedron*, 2017, **73**, 1275-1282; (b) N. Taniguchi, *J. Org. Chem.*, 2015, **80**, 7797-7802; (c) Y. Wang, Y. Zhao, C. Cai, L. Wang, H. Gong, *Org.*

- Lett.*, 2021, **23**, 8296–8301; (d) Z. Jiang, K. You, H. Wu, M. Xu, T. Wang, and J. Luo, *Org. Lett.*, 2024, **26**, 636–641
15. M.-Y. Chang, Y.-C. Cheng, Y.-J. Lu, *Org. Lett.*, 2015, **17**, 1264–1267.
  16. M.-Y. Chang, Y.-C. Chen, C.-K. Chan, *Synlett*, 2014, **25**, 1739–1744.
  17. M.-Y. Chang, Y.-C. Cheng, Y.-J. Lu, *Org. Lett.*, 2014, **16**, 6252–6255.
